# Supplementary material for: Cycloaddition of CO2 to epoxides “around water”: a strategy to apply and recycle efficient water-soluble bio-based organocatalysts in biphasic media
Source: Royal Society of Chemistry journal article supplement (doi:10.1039/d2gc04589c), 2023-01-01
Supplement: d2gc04589c1.pdf [file d2gc04589c1.pdf]

## Supporting Information

### **Cycloaddition of CO<sub>2</sub> to epoxides “around water”: A strategy to apply and recycle efficient water-soluble bio-based organocatalysts in biphasic media**

Tharinee Theerathanagorn,<sup>a</sup> Anna Vidal-López,<sup>b,c</sup> Aleix Comas-Vives,<sup>b,d</sup> Albert Poater,<sup>c\*</sup> Valerio D'Elia<sup>a\*</sup>

<sup>a</sup> *Department of Materials Science and Engineering, School of Molecular Science and Engineering, Vidyasirimedhi Institute of Science and Technology, (VISTEC), 21210, Payupnai, Wang Chan, Thailand.*

<sup>b</sup> *Department of Chemistry, Universitat Autònoma de Barcelona, 08193 Cerdanyola del Vallès, Catalonia, Spain.*

<sup>c</sup> *Institut de Química Computacional i Catàlisi and Departament de Química, Universitat de Girona, C/ Maria Aurèlia Capmany 69, 17003 Girona, Catalonia, Spain.*

<sup>d</sup> *Institute of Materials Chemistry, TU Wien, 1060 Wien, Austria*

## Contents

|                                                                                                 |      |
|-------------------------------------------------------------------------------------------------|------|
| S1. General Information.....                                                                    | S3   |
| S2. Synthesis and Characterization of Catalysts.....                                            | S3   |
| S3. <sup>1</sup> H NMR and <sup>13</sup> C NMR Spectra of Catalysts .....                       | S9   |
| S4. Solubility of the Catalysts in Epoxides and Cyclic Carbonates.....                          | S25  |
| S5. General Procedure for the Synthesis of Cyclic Carbonates .....                              | S33  |
| S6. Kinetic Profiles for Styrene Carbonate Synthesis Monitored by <sup>1</sup> H NMR .....      | S33  |
| S7. <sup>1</sup> H NMR Spectra of Crude Reaction .....                                          | S35  |
| S8. Supplementary Catalytic Results.....                                                        | S85  |
| S9. Control Experiment for the Reaction Phase.....                                              | S89  |
| S10. Quantification of Catalyst Concentration in the Aqueous Phase.....                         | S92  |
| S11. Substrate and Product Concentration Profile in the Aqueous Phase.....                      | S94  |
| S12. Calculation of the Isolated Yield of Cyclic Carbonate Product.....                         | S96  |
| S13. Determination of Chloride Ion Concentration in Seawater by Titration (Mohr's Method) ..... | S97  |
| S14. Supplementary Computational Results and Data.....                                          | S98  |
| S15. Supporting References.....                                                                 | S135 |

## S1. General Information

L-ascorbic acid (>99%), Tributylamine, tetra-N-butyl ammonium chloride (TBAC), tetra-N-butyl ammonium iodide (TBAI), tetra-N-ethyl ammonium iodide (TEAI), Choline Iodide (ChI), Hydrochloric acid (37%), Hydrobromic acid (57%), Hydroiodic acid (57%), Epichlorohydrin, Styrene oxide, Glycidyl Phenyl Ether, Glycidyl Methacrylate, Benzyl Glycidyl Ether, Propylene oxide, 1-Dodecene oxide, Methyl ricinoleate (>75%) and Methyl linolenate (>70%) were purchased from TCI Chemicals. Tetra-N-butyl ammonium bromide (TBAB), 1-Butene oxide, Potassium Carbonate, and Triethylamine were purchased from Merck. 1-Hexene oxide was purchased from Alfa Aesar. Furfuryl Glycidyl Ether was obtained from ACROS. Methyl *cis*-9-octadecenoate (99%), Ethyl oleate (70%), and m-CPBA were purchased from Sigma Aldrich. The CO<sub>2</sub> (99.99%) was obtained from Bangkok Industrial Gases. All solvents and reagents were used as received without further purification. Seawater was collected from cape Mae Phim, gulf of Thailand, in September 2022. The collected seawater was filtered to remove impurities before using as a reaction medium.

NMR spectra were measured on an automated “Bruker” for <sup>1</sup>H NMR (600 MHz) and <sup>13</sup>C (150 MHz). Chemical shifts for protons are reported in parts per million downfield from tetramethylsilane and referenced to residual protium in the NMR solvent (CDCl<sub>3</sub>: δ 7.26 ppm, DMSO-d<sub>6</sub>: δ 2.50 ppm, MeOD-d<sub>4</sub>: δ 3.31, 4.87 ppm and D<sub>2</sub>O: 4.79 ppm). Chemical shifts for carbon are referenced to the carbon resonances of the solvent (MeOD-d<sub>4</sub>: δ 49 ppm). High-resolution mass spectra (ESI/QTOF) were obtained using a compact™ ESI QTOF Mass Spectrometer. All mass spectra were calibrated post-run by the sodium formate cluster ions, which were used as the internal standard.

## S2. Synthesis and Characterization of Catalysts.

Please refer to Scheme 1 of the manuscript for the synthetic strategy and product structures.

### 2.1 General Procedure for the synthesis of glycidyltrialkylammonium chlorides

**Glycidyltributhylammonium chloride (3a)** was synthesized by a modified version of a previously described procedure.<sup>1</sup> Briefly, epichlorohydrin (216 mmol, 2.5 equiv.) was dissolved in methanol (20 mL) in a two-neck round-bottom flask. Tributylamine (86.5 mmol, 1 equiv.) dissolved in 16 mL methanol was added dropwise for 30 min. The reaction mixture was heated to reflux at 50 °C for 5 hours. Then, the mixture was cooled to room temperature and the volatile compounds were evaporated

using a rotary evaporator leading to the formation of two distinct phases. The lower phase was separated from the reaction mixture using a separatory funnel and washed several times with hexane. The residue was evacuated under a high vacuum to obtain **3a** (93 % yield) as a viscous yellowish liquid. <sup>1</sup>H NMR of compound **3a** (600 MHz, MeOD-d<sub>4</sub>) δ 4.07 (d, J = 14.7 Hz, 1H), 3.57 – 3.48 (m, 7H), 3.26 (dd, J = 14.7, 9.2 Hz, 1H), 3.08 (t, J = 4.7 Hz, 1H), 2.88 (dd, J = 4.9, 2.2 Hz, 1H), 1.91 – 1.80 (m, 6H), 1.60 – 1.53 (m, 6H), 1.15 (t, J = 7.4 Hz, 9H). <sup>13</sup>C NMR of compound **3a** (151 MHz, MeOD-d<sub>4</sub>) δ 62.71, 60.48, 45.65, 45.33, 24.85, 20.67, 14.00. HRMS (ESI/QTOF), m/z: [M+H]<sup>+</sup> Calcd for [C<sub>15</sub>H<sub>33</sub>NOCl]<sup>+</sup>: 242.2478; found: 242.2479.

**Glycidyltriethylammonium chloride (3b)** was synthesized by a modified version of a previously described procedure.<sup>1</sup> Triethylamine (10 g, 99 mmol, 1 equiv.), epichlorohydrin (13.74 g, 149 mmol, 1.5 equiv.), and methanol (40 mL) were added into a 250 mL round bottom flask containing a stirring bar. This mixture was stirred under reflux at 50 °C for 2.5 h. Then, the mixture was cooled to room temperature, evaporating the volatile compounds under reduced pressure and obtaining a viscous liquid. Diethyl ether (100 mL) was added to the reaction product, and the mixture was stirred for 30 min after which the diethyl ether phase was discarded by decantation. The latter step was repeated five times. Finally, the volatile compounds in the reaction product were evaporated under reduced pressure to afford **3b** (90 %yield) a colorless oil. <sup>1</sup>H NMR of **3b** (600 MHz, MeOD-d<sub>4</sub>) δ 4.13 (d, J = 14.8 Hz, 1H), 3.75 (m, J = 7.0 Hz, 7H), 3.38 (dd, J = 14.9, 9.1 Hz, 1H), 3.19 (t, J = 4.8 Hz, 1H), 3.05 – 3.01 (m, 1H), 1.58 (t, J = 7.7 Hz, 9H). <sup>13</sup>C NMR of compound **3b** (151 MHz, MeOD-d<sub>4</sub>) δ 61.08, 55.30, 54.99, 45.67, 45.39, 8.24, 8.06, 7.95. HRMS (ESI/QTOF), m/z: [M+H]<sup>+</sup> Calcd. for [C<sub>9</sub>H<sub>21</sub>NOCl]<sup>+</sup>: 158.1539; found: 158.1532.

## 2.2 General Procedure for the synthesis of Ascorbic acid-based compounds **5a**, **5b**, **6a** and **6b**

### Procedure A

Compounds **5a-b** and **6a-b** were synthesized by ring-opening of glycidyltrialkylammonium chlorides **3a** (**5a** and **6a**) and **3b** (**5b** and **6b**) with ascorbic acid (**5a** and **5b**) or 5,6-Isopropylidene-L-ascorbic acid (**4**, for **6a** and **6b**).<sup>2</sup> A mixture of ascorbic acid or **4** (5 g, 28.39 mmol, 1 equiv.), K<sub>2</sub>CO<sub>3</sub> (4.71 g, 34.07 mmol, 1.2 equiv.), DMF (5 mL) and H<sub>2</sub>O (5 mL) was stirred at room temperature for 30 min. Then, glycidyltrialkylammonium chloride **3a** or **3b** (34.07 mmol, 1.2 equiv.) was added, and the resulting mixture was stirred at 60 °C for 24 hours. Then, the solvent was evaporated under vacuum, and the crude product was purified by flash chromatography to afford the series of ascorbic acid derivatives **5a-b** and **6a-b**.

### Procedure B

Compounds **5a-b** and **6a-b** were synthesized by ring-opening of glycidyltrialkylammonium chlorides **3a** (**5a** and **6a**) and **3b** (**5b** and **6b**) with ascorbic acid (**5a** and **5b**) or 5,6-Isopropylidene-L-ascorbic acid (**4**, for **6a** and **6b**).<sup>2</sup> A mixture of ascorbic acid or **4** (5 g, 28.39 mmol, 1 equiv.), K<sub>2</sub>CO<sub>3</sub> (4.71 g, 34.07 mmol, 1.2 equiv.), MeOH (7 mL) and H<sub>2</sub>O (7 mL) was stirred at room temperature for 30 min. Then, glycidyltrialkylammonium chloride **3a** or **3b** (34.07 mmol, 1.2 equiv.) was added and the resulting mixture was refluxed at 55 °C for 24 hours. Then, the solvent was evaporated under vacuum, and the crude product was purified by flash chromatography to afford the series of ascorbic acid derivatives **5a-b** and **6a-b**.

**5-(1,2-dihydroxyethyl)-4-(2-hydroxy-3-(tributylammonio)propoxy)-2-oxo-2,5-dihydrofuran-3-olate**

**(5a)** The crude product was purified by flash chromatography on silica gel (EtOAc: EtOH, 80:20) affording a yellow foam (72% yield for procedure A and 55% yield for procedure B). <sup>1</sup>H NMR (600 MHz, MeOD-d<sub>4</sub>) δ 4.42 (dd, J = 5.7, 2.3 Hz, 1H), 4.38 – 4.25 (m, 1H), 3.96 – 3.84 (m, 2H), 3.77 – 3.63 (m, 3H), 3.58 – 3.47 (m, 4H), 3.46 – 3.37 (m, 4H), 1.33 (q, J = 6.8, 4.7 Hz, 9H). <sup>13</sup>C NMR (151 MHz, MeOD-d<sub>4</sub>) δ 180.01, 179.72, 177.84, 177.69, 118.38, 118.14, 79.82, 79.79, 76.06, 75.89, 71.54, 71.49, 65.58, 65.35, 64.07, 64.05, 60.62, 60.40, 54.84, 7.87. HRMS (ESI/QTOF), m/z: [M+HCOO]<sup>-</sup> Calcd. for [C<sub>21</sub>H<sub>39</sub>NO<sub>7</sub>+HCOO]<sup>-</sup>: 462.2709; found: 462.2706.

**5-(1,2-dihydroxyethyl)-4-(2-hydroxy-3-(triethylammonio)propoxy)-2-oxo-2,5-dihydrofuran-3-olate**

**(5b)** The crude product was purified by flash chromatography on silica gel (EtOAc: MeOH, 35:65) affording a pale yellow foam (89% yield for procedure A and 61% yield for procedure B). <sup>1</sup>H NMR (600 MHz, MeOD-d<sub>4</sub>) δ 4.42 (dd, J = 5.7, 2.3 Hz, 1H), 4.38 – 4.25 (m, 1H), 3.96 – 3.84 (m, 2H), 3.77 – 3.63 (m, 3H), 3.58 – 3.47 (m, 4H), 3.46 – 3.37 (m, 4H), 1.33 (q, J = 6.8, 4.7 Hz, 9H). <sup>13</sup>C NMR (151 MHz, MeOD-d<sub>4</sub>) δ 180.01, 179.72, 177.84, 177.69, 118.38, 118.14, 79.82, 79.79, 76.06, 75.89, 71.54, 71.49, 65.58, 65.35, 64.07, 64.05, 60.62, 60.40, 54.84, 7.87. HRMS (ESI/QTOF), m/z: [M+HCOO]<sup>-</sup> Calcd for [C<sub>15</sub>H<sub>27</sub>NO<sub>7</sub>+HCOO]<sup>-</sup>: 378.1770; found: 378.1771.

**5-(2,2-dimethyl-1,3-dioxolan-4-yl)-4-(2-hydroxy-3-(tributylammonio)propoxy)-2-oxo-2,5**

**dihydrofuran-3-olate (6a)** The crude product was purified by flash chromatography on silica gel (EtOAc: EtOH, 90:10) to afford a light yellow foam in 67% yield (procedure A) and 53% yield (procedure B). <sup>1</sup>H NMR (600 MHz, MeOD-d<sub>4</sub>) δ 4.39 – 4.25 (m, 3H), 4.16 (t, J = 7.8 Hz, 1H), 4.08 (t, J = 7.7 Hz, 1H), 3.96 – 3.89 (m, 1H), 3.75 – 3.68 (m, 1H), 3.65 (d, J = 14.4 Hz, 1H), 3.53 – 3.42 (m, 4H), 3.39 – 3.31 (m, 3H), 1.84 – 1.75 (m, 3H), 1.75 – 1.66 (m, 3H), 1.47 – 1.40 (m, 6H), 1.37 (s, 3H), 1.34 (s, 3H), 1.04 (t, J = 7.5 Hz, 9H). <sup>13</sup>C NMR (151 MHz, MeOD-d<sub>4</sub>) δ 177.90, 177.84, 177.26, 177.23, 118.60, 118.49, 110.57, 76.13, 76.09, 76.05, 75.93, 66.53, 65.71, 65.65, 62.39, 62.32, 60.51, 26.51, 26.49, 25.99, 25.97, 24.81, 20.66, 13.99. HRMS (ESI/QTOF), m/z: [M+HCOO]<sup>-</sup> Calcd for [C<sub>24</sub>H<sub>43</sub>NO<sub>7</sub>+HCOO]<sup>-</sup>: 502.3022; found: 502.3022.

**5-(2,2-dimethyl-1,3-dioxolan-4-yl)-4-(2-hydroxy-3-(triethylammonio)propoxy)-2-oxo-2,5-dihydrofuran-3-olate (6b)** The crude product was purified by column chromatography (EtOAc: MeOH, 65:35) to afford **6b** as a light brown foam in 85% yield (procedure A) and 71% yield (procedure B). <sup>1</sup>H NMR (600 MHz, MeOD-d<sub>4</sub>) δ 4.41 – 4.32 (m, 2H), 4.30 (d, J = 3.3 Hz, 1H), 4.17 (t, J = 7.7 Hz, 1H), 4.10 (t, J = 7.7 Hz, 1H), 3.97 – 3.88 (m, 1H), 3.77 – 3.67 (m, 1H), 3.65 – 3.51 (m, 4H), 3.51 – 3.41 (m, 4H), 1.42 – 1.32 (m, 15H). <sup>13</sup>C NMR (151 MHz, MeOD-d<sub>4</sub>) δ 179.02, 178.90, 177.47, 118.21, 110.56, 110.54, 78.98, 78.97, 76.05, 76.03, 66.48, 65.57, 65.54, 60.72, 60.57, 54.88, 26.48, 25.93, 7.90. HRMS (ESI/QTOF), m/z: [M+HCOO]<sup>-</sup> Calcd for [C<sub>18</sub>H<sub>31</sub>NO<sub>7</sub>+HCOO]<sup>-</sup>: 418.2083; found: 418.2083.

### 2.3 General Procedure for the protonation of compounds **5a-b** and **6a-b**

The ascorbic acid-based catalysts **7a-X**, **7b-X** (X= Cl, Br, I), **8a-I**, and **8b-I** were synthesized according to a method reported in the literature. In a representative experiment, 2M hydrohalic acid (HCl, HBr, or HI) was added to a solution of **5a** (3g) dissolved in water (5 mL) until reaching pH 2 at room temperature. Afterward, the mixture was frozen and freeze-dried overnight to afford **7a-X** (X= Cl, Br, I).

**N,N-dibutyl-N-(3-((2-(1,2-dihydroxyethyl)-4-hydroxy-5-oxo-2,5-dihydrofuran-3-yl)oxy)-2-hydroxypropyl)butan-1-ammonium chloride (7a-Cl)** A light-brown foam was obtained. <sup>1</sup>H NMR (600 MHz, MeOD-d<sub>4</sub>) δ 4.84 (s, 1H), 4.37 (q, J = 6.8 Hz, 1H), 4.04 – 3.96 (m, 1H), 3.91 (t, J = 7.5 Hz, 1H), 3.88 – 3.82 (m, 1H), 3.67 – 3.59 (m, 2H), 3.54 (d, J = 14.6 Hz, 1H), 3.46 (dd, J = 14.5, 9.3 Hz, 1H), 3.41 – 3.35 (m, 3H), 3.32 – 3.26 (m, 3H), 1.77 – 1.68 (m, 3H), 1.67 – 1.57 (m, 3H), 1.36 (h, J = 7.4 Hz, 6H), 0.96 (t, J = 7.4 Hz, 9H). <sup>13</sup>C NMR (151 MHz, MeOD-d<sub>4</sub>) δ 172.70, 172.66, 162.29, 162.20, 121.73, 121.67, 76.99, 75.10, 75.01, 70.37, 70.34, 65.40, 65.35, 63.37, 61.95, 60.55, 24.77, 20.58, 13.93. HRMS (ESI/QTOF), m/z: [M-H]<sup>-</sup> Calcd for [C<sub>21</sub>H<sub>39</sub>ClNO<sub>7</sub>]<sup>-</sup>: 452.2421; found: 452.2427.

**N,N-dibutyl-N-(3-((2-(1,2-dihydroxyethyl)-4-hydroxy-5-oxo-2,5-dihydrofuran-3-yl)oxy)-2-hydroxypropyl)butan-1-ammonium bromide (7a-Br)** A light-brown foam was obtained. <sup>1</sup>H NMR (600 MHz, MeOD-d<sub>4</sub>) δ 4.94 (s, 1H), 4.47 (q, J = 6.9 Hz, 1H), 4.12 – 4.06 (m, 1H), 3.98 (t, J = 7.8 Hz, 1H), 3.97 – 3.90 (m, 1H), 3.74 – 3.68 (m, 2H), 3.63 (d, J = 14.1 Hz, 1H), 3.55 (dd, J = 15.0, 9.2 Hz, 1H), 3.50 – 3.44 (m, 3H), 3.42 – 3.35 (m, 3H), 1.86 – 1.78 (m, 3H), 1.76 – 1.67 (m, 3H), 1.46 (h, J = 7.3 Hz, 6H), 1.05 (t, J = 7.4 Hz, 9H). <sup>13</sup>C NMR (151 MHz, MeOD-d<sub>4</sub>) δ 172.55, 172.51, 162.12, 162.04, 121.60, 121.53, 76.84, 74.96, 74.87, 70.23, 70.19, 65.26, 65.21, 63.22, 61.81, 60.41, 24.63, 20.44, 13.79. HRMS (ESI/QTOF), m/z: [M-H]<sup>-</sup> Calcd for [C<sub>21</sub>H<sub>39</sub>BrNO<sub>7</sub>]<sup>-</sup>: 496.1915; found: 496.1915.

**N,N-dibutyl-N-(3-((2-(1,2-dihydroxyethyl)-4-hydroxy-5-oxo-2,5-dihydrofuran-3-yl)oxy)-2-hydroxypropyl)butan-1-ammonium iodide (7a-I)** A pale-yellow foam was obtained. <sup>1</sup>H NMR

(600 MHz, MeOD- $d_4$ )  $\delta$  4.95 (s, 1H), 4.49 (q,  $J = 6.8$  Hz, 1H), 4.14 – 4.07 (m, 1H), 4.01 (t,  $J = 8.0$  Hz, 1H), 4.01 – 3.92 (m, 1H), 3.76 – 3.70 (m, 2H), 3.65 (d,  $J = 14.4$  Hz, 1H), 3.57 (dd,  $J = 14.8, 9.2$  Hz, 1H), 3.54 – 3.45 (m, 3H), 3.45 – 3.35 (m, 3H), 1.88 – 1.79 (m, 3H), 1.79 – 1.70 (m, 3H), 1.69 (s, 0H), 1.48 (h,  $J = 7.3$  Hz, 6H), 1.07 (t,  $J = 7.4$  Hz, 9H).  $^{13}\text{C NMR}$  (151 MHz, MeOD- $d_4$ )  $\delta$  172.58, 172.54, 161.79, 161.76, 121.90, 121.87, 76.95, 75.17, 75.11, 70.38, 70.35, 65.45, 65.43, 63.34, 61.98, 60.68, 24.90, 20.65, 13.96 **HRMS** (ESI/QTOF),  $m/z$ :  $[\text{M-H}]^-$  Calcd for  $[\text{C}_{21}\text{H}_{39}\text{INO}_7]^-$ : 544.1777; found: 544.1781.

**3-((2-(1,2-dihydroxyethyl)-4-hydroxy-5-oxo-2,5-dihydrofuran-3-yl)oxy)-*N,N,N*-triethyl-2-hydroxypropan-1-ammonium chloride (7b-Cl)** A light-brown foam was obtained.  $^1\text{H NMR}$  (600 MHz, MeOD- $d_4$ )  $\delta$  4.58 (s, 2H), 4.09 (q,  $J = 6.6$  Hz, 1H), 3.77 – 3.69 (m, 1H), 3.64 (t,  $J = 7.0$  Hz, 1H), 3.63 – 3.55 (m, 1H), 3.38 – 3.27 (m, 2H), 3.25 – 3.14 (m, 4H), 3.17 – 3.05 (m, 4H), 0.99 (t,  $J = 7.4$  Hz, 9H).  $^{13}\text{C NMR}$  (151 MHz, MeOD- $d_4$ )  $\delta$  172.34, 172.30, 161.34, 161.30, 121.73, 121.69, 76.81, 75.00, 74.94, 70.20, 70.17, 65.25, 65.22, 63.33, 60.19, 54.92, 7.93. **HRMS** (ESI/QTOF),  $m/z$ :  $[\text{M-H}]^-$  Calcd for  $[\text{C}_{15}\text{H}_{27}\text{ClNO}_7]^-$ : 368.1482; found: 368.1489.

**3-((2-(1,2-dihydroxyethyl)-4-hydroxy-5-oxo-2,5-dihydrofuran-3-yl)oxy)-*N,N,N*-triethyl-2-hydroxypropan-1-ammonium bromide (7b-Br)** A pale-yellow foam was obtained.  $^1\text{H NMR}$  (600 MHz, MeOD- $d_4$ )  $\delta$  4.72 (s, 1H), 4.29 (q,  $J = 6.7$  Hz, 1H), 3.93 – 3.86 (m, 1H), 3.86 – 3.81 (m, 1H), 3.81 – 3.73 (m, 1H), 3.58 – 3.48 (m, 2H), 3.42 – 3.34 (m, 4H), 3.34 – 3.26 (m, 4H), 1.19 (t,  $J = 7.4$  Hz, 9H).  $^{13}\text{C NMR}$  (151 MHz, MeOD- $d_4$ )  $\delta$  173.17, 164.35, 164.13, 121.16, 121.05, 77.24, 77.22, 75.17, 75.10, 70.32, 70.30, 65.25, 65.20, 63.37, 60.15, 54.94, 8.00. **HRMS** (ESI/QTOF),  $m/z$ :  $[\text{M-H}]^-$  Calcd for  $[\text{C}_{15}\text{H}_{27}\text{BrNO}_7]^-$ : 412.0976; found: 412.0981.

**3-((2-(1,2-dihydroxyethyl)-4-hydroxy-5-oxo-2,5-dihydrofuran-3-yl)oxy)-*N,N,N*-triethyl-2-hydroxypropan-1-ammonium iodide (7b-I)** A pale-yellow foam was obtained.  $^1\text{H NMR}$  (600 MHz, MeOD- $d_4$ )  $\delta$  4.79 (s, 1H), 4.36 (q,  $J = 5.7$  Hz, 1H), 4.01 – 3.92 (m, 1H), 3.90 (t,  $J = 6.9$  Hz, 1H), 3.87 – 3.80 (m, 1H), 3.66 – 3.57 (m, 2H), 3.50 – 3.42 (m, 4H), 3.44 – 3.33 (m, 4H), 1.28 (t,  $J = 7.2$  Hz, 9H).  $^{13}\text{C NMR}$  (151 MHz, MeOD- $d_4$ )  $\delta$  172.89, 163.11, 162.99, 121.51, 121.43, 77.09, 75.19, 75.13, 70.32, 70.30, 65.32, 65.29, 63.33, 60.27, 55.08, 8.10. **HRMS** (ESI/QTOF),  $m/z$ :  $[\text{M-H}]^-$  Calcd for  $[\text{C}_{15}\text{H}_{27}\text{INO}_7]^-$ : 460.0838; found: 460.0838.

***N,N*-dibutyl-*N*-(3-((2-(2,2-dimethyl-1,3-dioxolan-4-yl)-4-hydroxy-5-oxo-2,5-dihydrofuran-3-yl)oxy)-2-hydroxypropyl)butan-1-ammonium iodide (8a-I)** A light yellow foam was obtained.  $^1\text{H NMR}$  (600 MHz, MeOD- $d_4$ )  $\delta$  4.72 (s, 1H), 4.47 – 4.38 (m, 2H), 4.20 (t,  $J = 7.8$  Hz, 1H), 4.11 – 3.98 (m, 2H), 3.86 (dd,  $J = 10.2, 6.8$  Hz, 1H), 3.62 (dd,  $J = 14.5, 8.4$  Hz, 1H), 3.56 – 3.48 (m, 1H), 3.49 – 3.41 (m, 3H), 3.39 – 3.32 (m, 3H), 1.84 – 1.74 (m, 3H), 1.76 – 1.65 (m, 3H), 1.48 – 1.39 (m, 6H), 1.34 (s,

3H), 1.33 (s, 3H), 1.02 (t, J = 7.4 Hz, 9H). <sup>13</sup>C NMR (151 MHz, MeOD-d<sub>4</sub>) δ 173.13, 173.09, 164.26, 164.19, 121.43, 121.35, 111.12, 111.11, 76.84, 76.82, 75.37, 75.27, 75.01, 66.46, 65.54, 65.48, 62.11, 60.60, 26.29, 25.71, 25.69, 24.82, 20.65, 13.94. HRMS (ESI/QTOF), m/z: [M-H]<sup>-</sup> Calcd for [C<sub>24</sub>H<sub>44</sub>INO<sub>7</sub>]<sup>-</sup>: 584.2090; found: 584.2090.

**3-((2-(2,2-dimethyl-1,3-dioxolan-4-yl)-4-hydroxy-5-oxo-2,5-dihydrofuran-3-yl)oxy)-N,N,N-triethyl-2-hydroxypropan-1-ammonium iodide (8b-I)** A light brown foam was obtained. <sup>1</sup>H NMR (600 MHz, MeOD-d<sub>4</sub>) δ 4.67 (d, J = 2.5 Hz, 1H), 4.33 – 4.26 (m, 2H), 4.06 (t, J = 7.9 Hz, 1H), 3.96 – 3.88 (m, 2H), 3.81 – 3.72 (m, 1H), 3.45 – 3.38 (m, 4H), 3.39 – 3.32 (m, 1H), 3.35 – 3.26 (m, 3H), 1.20 (t, J = 7.3 Hz, 9H), 1.18 (s, 3H), 1.17 (s, 3H). <sup>13</sup>C NMR (151 MHz, MeOD-d<sub>4</sub>) δ 172.12, 172.09, 161.38, 161.36, 121.79, 121.73, 111.09, 76.46, 75.11, 75.01, 74.70, 66.39, 65.32, 65.27, 60.32, 54.98, 26.27, 25.60, 7.96. HRMS (ESI/QTOF), m/z: [M-H]<sup>-</sup> Calcd for [C<sub>18</sub>H<sub>31</sub>INO<sub>7</sub>]<sup>-</sup>: 500.1150; found: 500.1153.

**2-(1,2-dihydroxyethyl)-4-(2-hydroxy-3-(triethylammonio)propoxy)-5-oxo-2,5-dihydrofuran-3-olate (9b)**

Ascorbic acid (5 g, 28.39 mmol, 1 equiv.) and NaOH (1.7 g, 42.58 mmol 1.5 equiv.) were dissolved in a mixture of DMF (7 mL) and water (5 mL) at room temperature for 30 minutes. Afterward, **3b** (42.58 mmol, 1.5 equiv.) was added and stirred at 60 °C for 24 hours. The solvent was concentrated under vacuum, and the crude product was purified by flash chromatography (CHCl<sub>3</sub>: MeOH, 40:60). <sup>1</sup>H NMR (600 MHz, MeOD-d<sub>4</sub>) δ 4.42 (dd, 1H), 4.36 – 4.26 (m, 1H), 3.97 – 3.81 (m, 2H), 3.77 – 3.63 (m, 3H), 3.58 – 3.46 (m, 4H), 3.46 – 3.36 (m, 4H), 1.33 (q, J = 6.5 Hz, 9H). <sup>13</sup>C NMR (151 MHz, MeOD-d<sub>4</sub>) δ 179.97, 179.70, 177.80, 177.65, 118.33, 118.10, 79.77, 79.73, 76.05, 75.87, 71.45, 71.41, 65.54, 65.32, 64.02, 63.99, 60.54, 60.33, 54.82, 7.87. HRMS (ESI/QTOF), m/z: [M+HCOO]<sup>-</sup> Calcd for [C<sub>15</sub>H<sub>27</sub>NO<sub>7</sub>+HCOO]<sup>-</sup>: 378.1770; found: 378.1772.

**3-((5-(1,2-dihydroxyethyl)-4-hydroxy-2-oxo-2,5-dihydrofuran-3-yl)oxy)-N,N,N-triethyl-2-hydroxypropan-1-ammonium (9b-I)** was obtained as a pale yellow foam from **9b** following the procedure listed above for the synthesis of **7a-X** from **5a** (89 %yield). <sup>1</sup>H NMR of (600 MHz, MeOD-d<sub>4</sub>) δ 5.00 (d, J = 1.7 Hz, 1H), 4.58 – 4.51 (m, 1H), 4.19 – 4.11 (m, 1H), 4.07 – 3.98 (m, 2H), 3.80 – 3.72 (m, 2H), 3.69 – 3.59 (m, 4H), 3.58 – 3.50 (m, 4H), 1.43 (t, J = 7.2 Hz, 9H). <sup>13</sup>C NMR (151 MHz, MeOD-d<sub>4</sub>) δ 172.46, 172.41, 161.45, 161.40, 121.85, 121.82, 76.88, 76.87, 75.12, 75.06, 70.27, 70.25, 65.34, 65.32, 63.30, 55.14, 8.09. HRMS (ESI/QTOF), m/z: [M-H]<sup>-</sup> Calcd for [C<sub>15</sub>H<sub>27</sub>INO<sub>7</sub>]<sup>-</sup>: 460.0838; found: 460.0838.



### S3. $^1\text{H}$ NMR and $^{13}\text{C}$ NMR Spectra of Catalysts

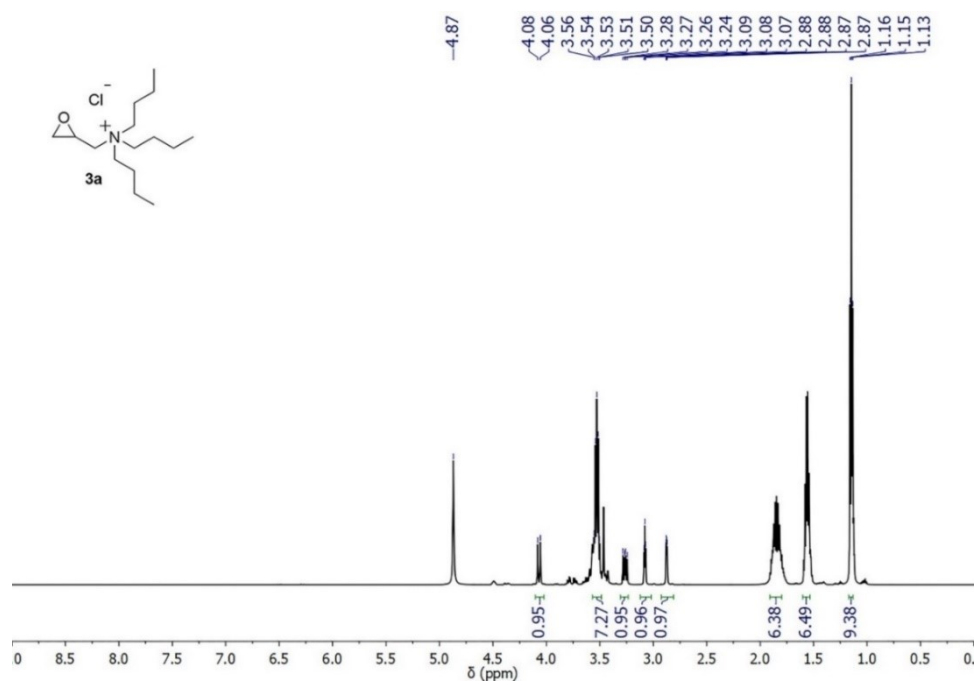

**Figure S1.**  $^1\text{H}$  NMR (MeOD- $d_4$ ) spectrum of compound **3a**.

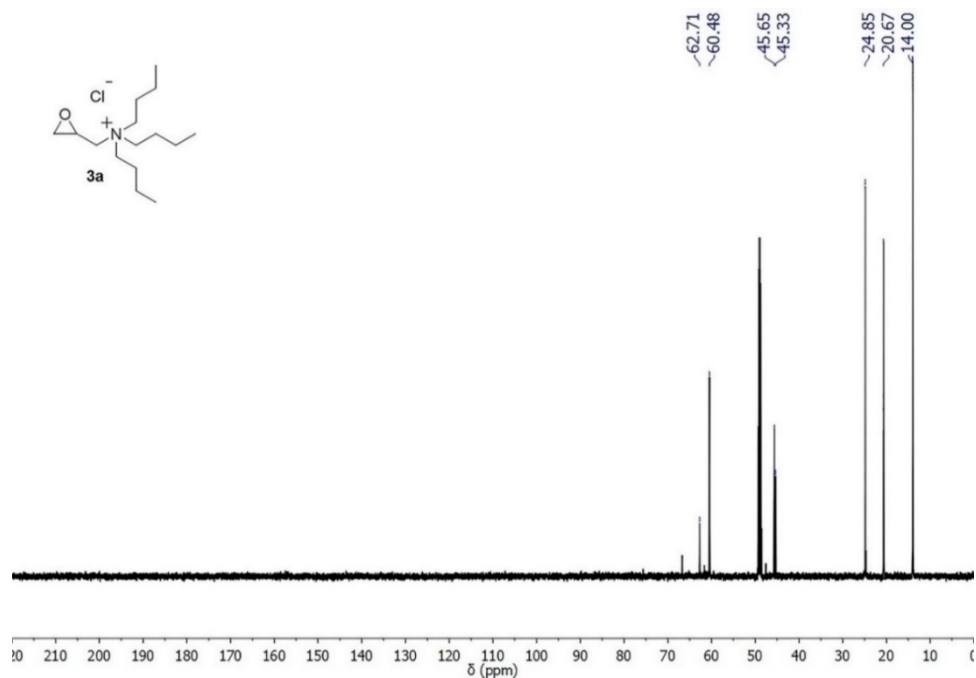

**Figure S2.**  $^{13}\text{C}$  NMR (MeOD- $d_4$ ) spectrum of compound **3a**.

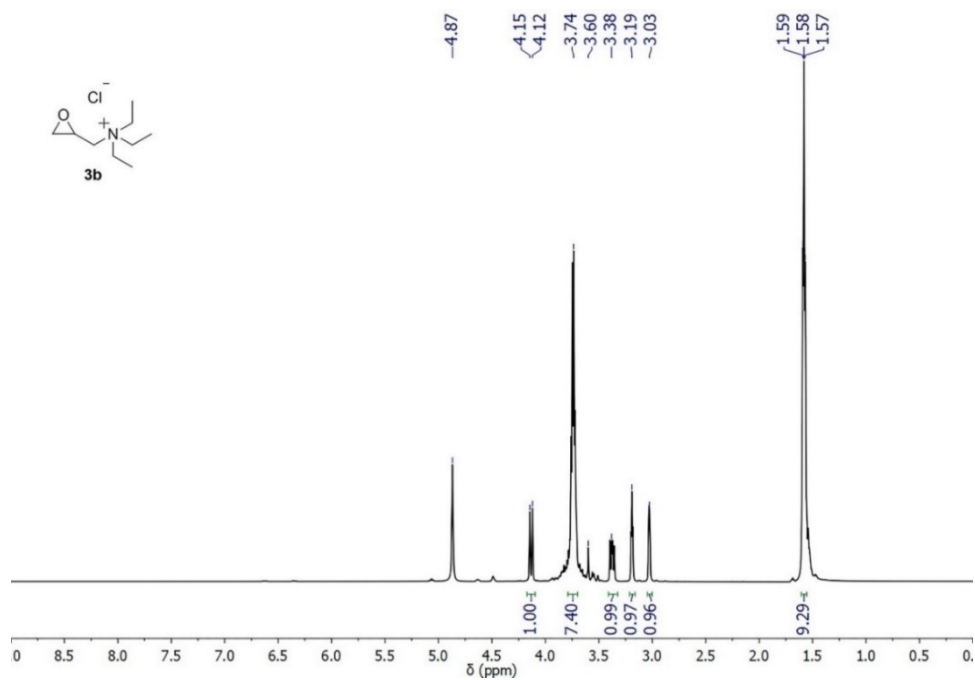

**Figure S3.** <sup>1</sup>H NMR (MeOD-d<sub>4</sub>) spectrum of compound **3b**.

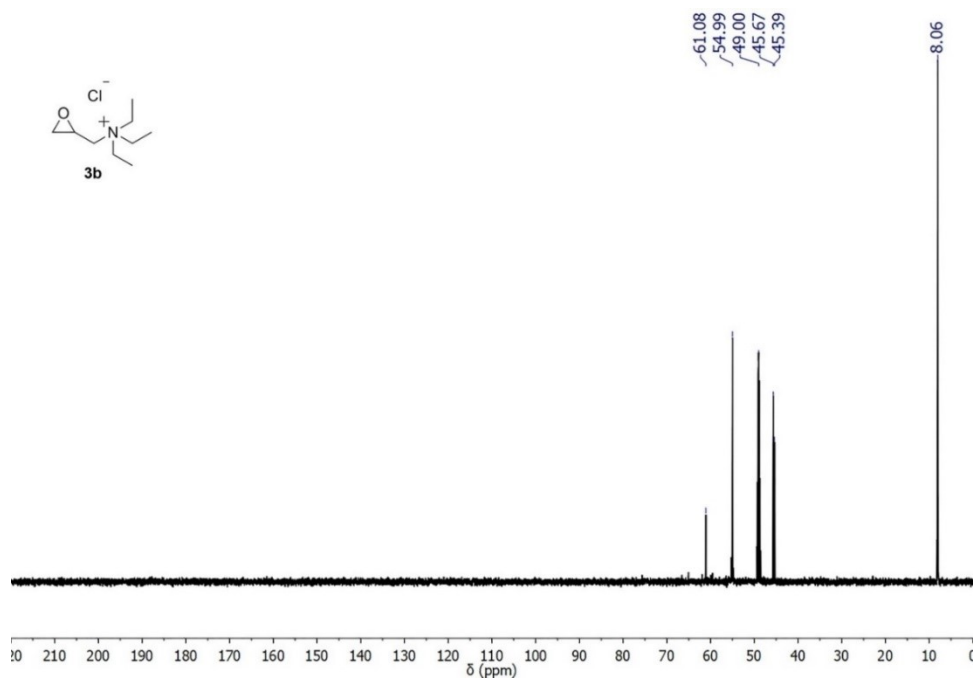

**Figure S4.** <sup>13</sup>C NMR (MeOD-d<sub>4</sub>) spectrum of compound **3b**.

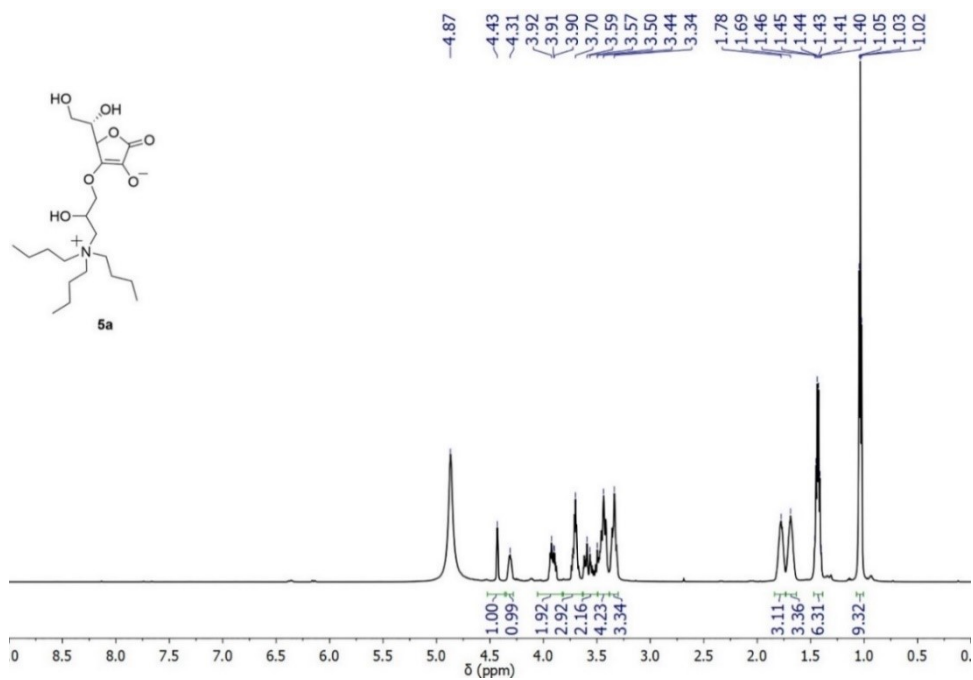

**Figure S5.**  $^1\text{H NMR}$  (MeOD- $d_4$ ) spectrum of compound **5a**.

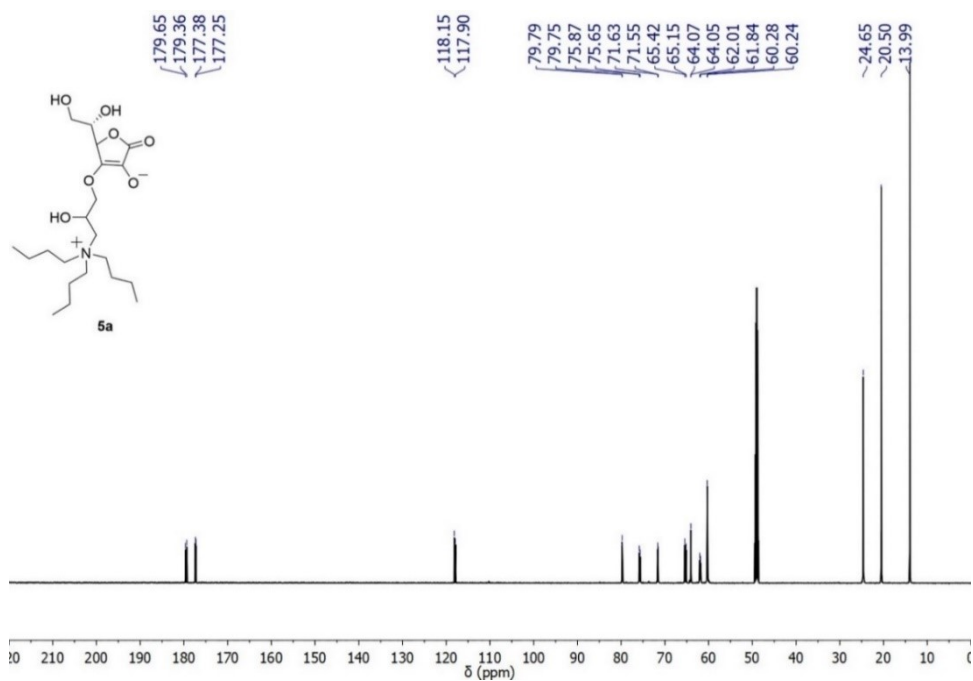

**Figure S6.**  $^{13}\text{C NMR}$  (MeOD- $d_4$ ) spectrum of compound **5a**.

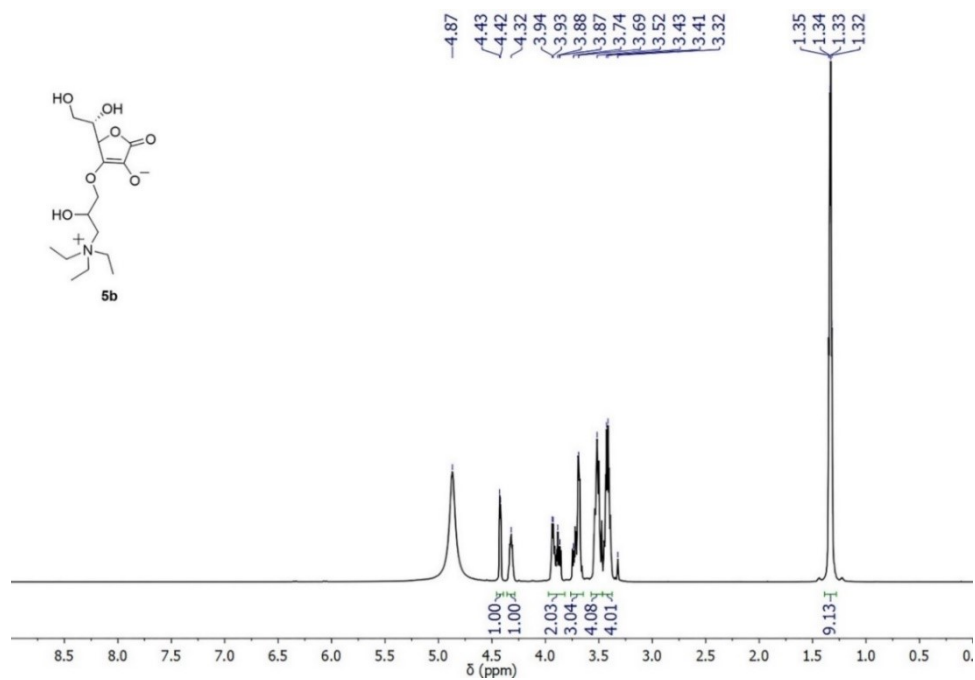

**Figure S7.**  $^1\text{H NMR}$  (MeOD- $d_4$ ) spectrum of compound **5b**.

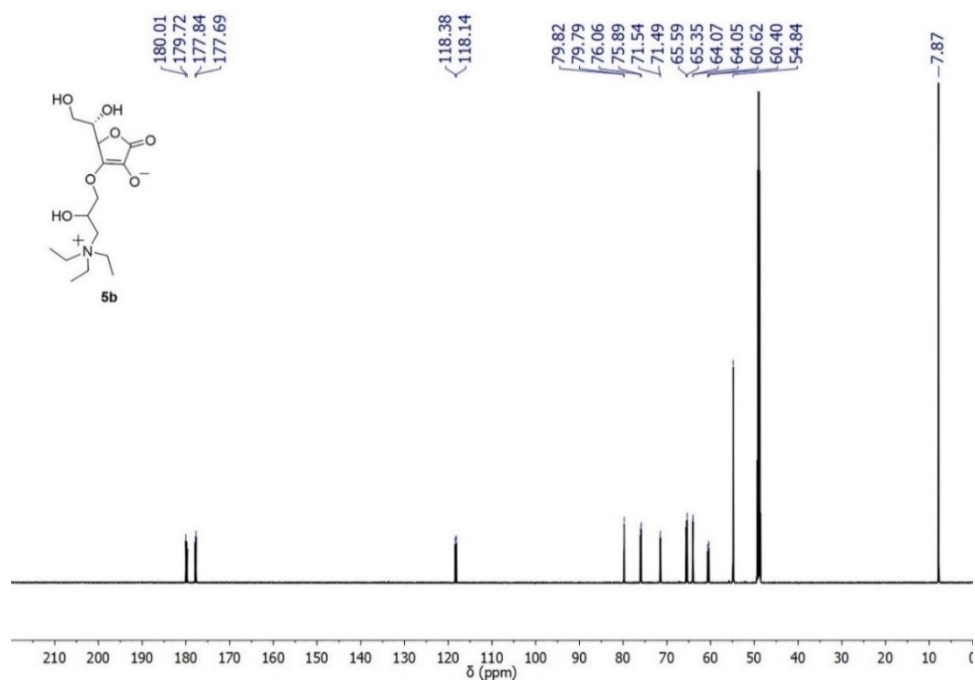

**Figure S8.**  $^{13}\text{C NMR}$  (MeOD- $d_4$ ) spectrum of compound **5b**.

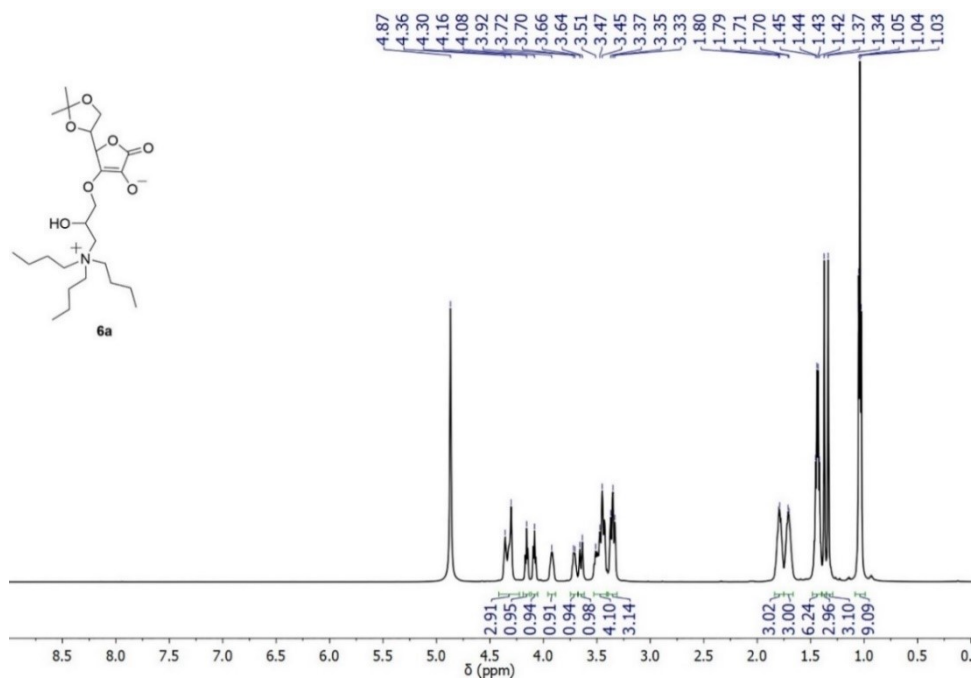

**Figure S9.**  $^1\text{H NMR}$  (MeOD- $d_4$ ) spectrum of compound **6a**.

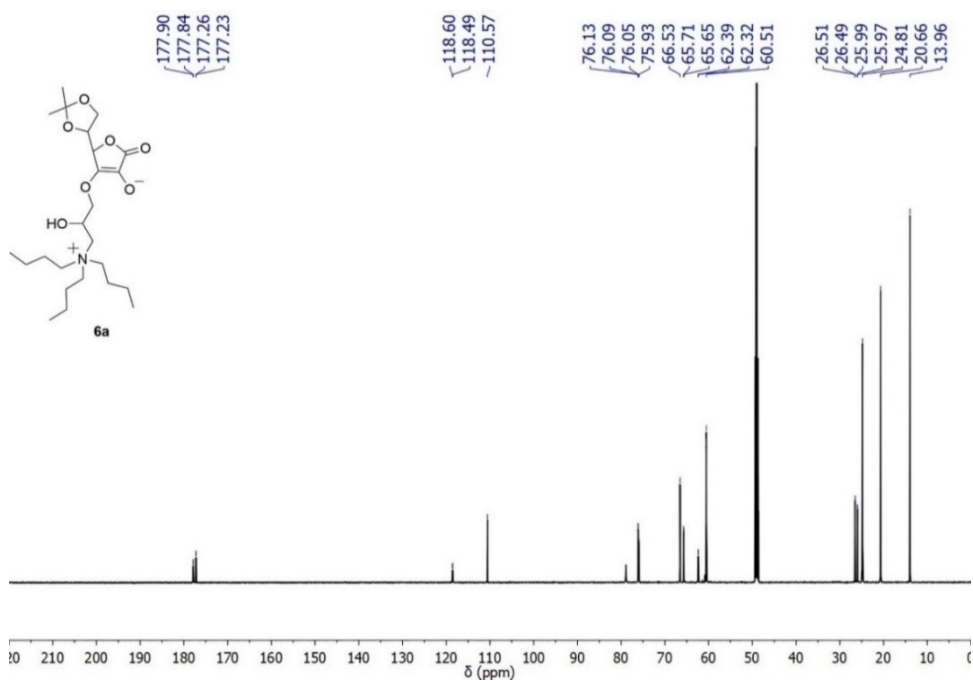

**Figure S10.**  $^{13}\text{C NMR}$  (MeOD- $d_4$ ) spectrum of compound **6a**.

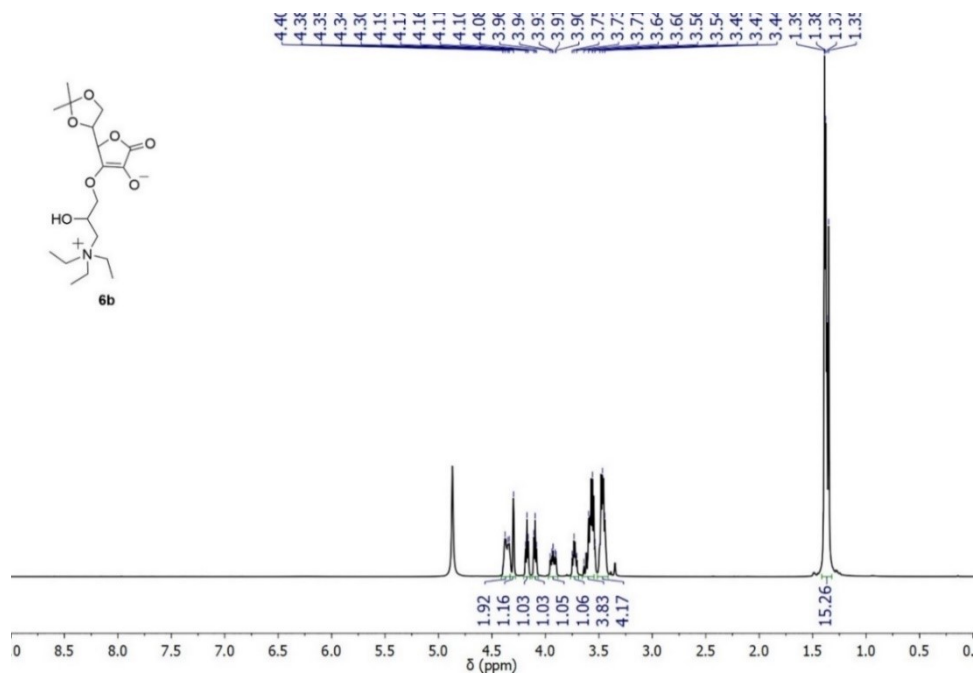

**Figure S11.**  $^1\text{H}$  NMR (MeOD- $d_4$ ) spectrum of compound **6b**.

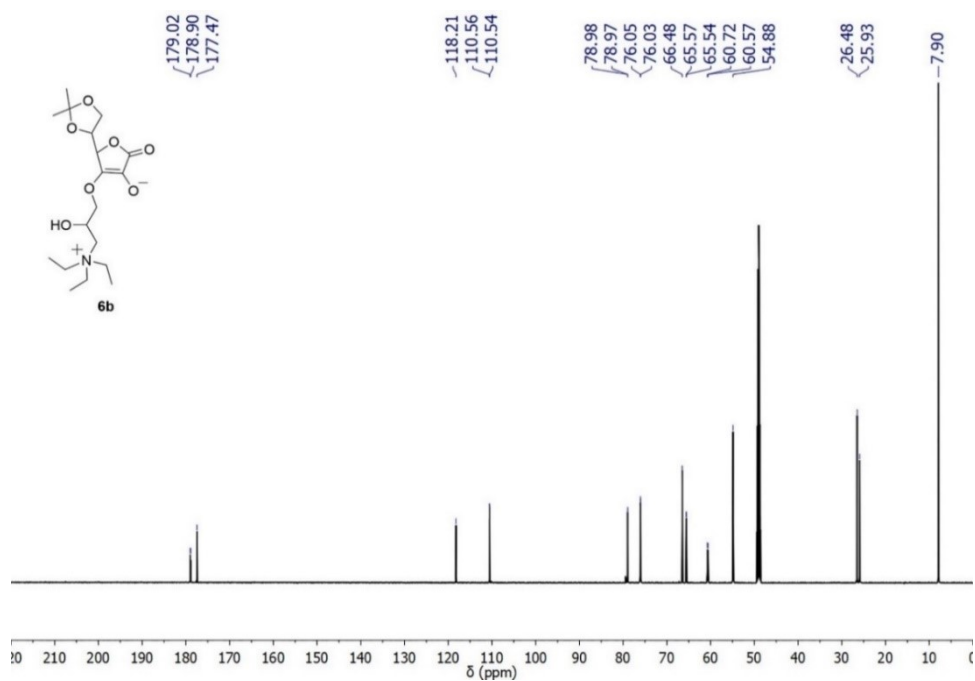

**Figure S12.**  $^{13}\text{C}$  NMR (MeOD- $d_4$ ) spectrum of compound **6b**.

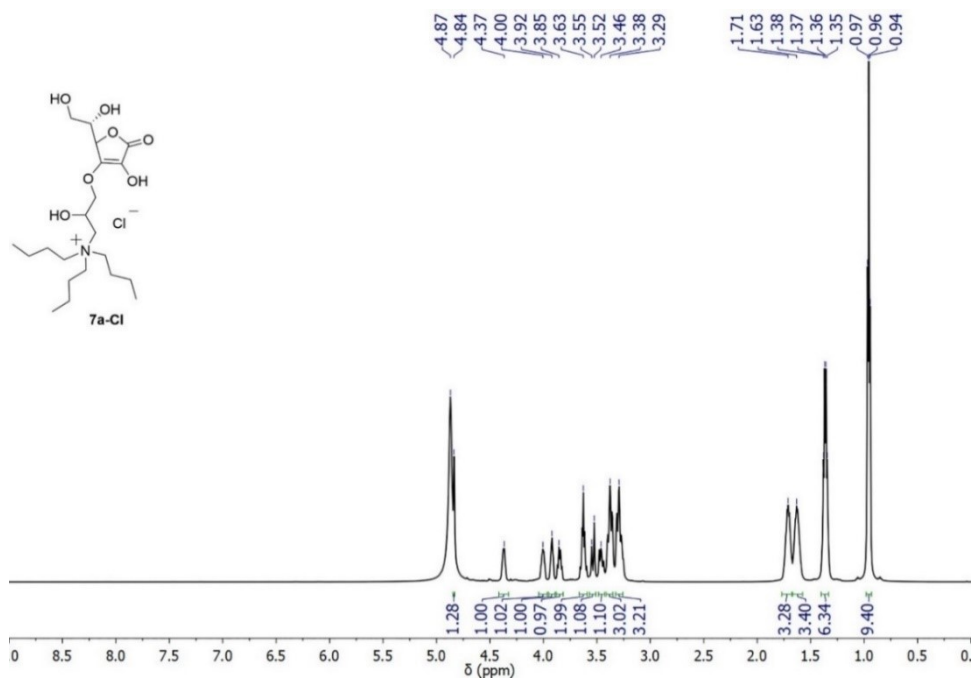

Figure S13. <sup>1</sup>H NMR (MeOD-d<sub>4</sub>) spectrum of compound 7a-Cl.

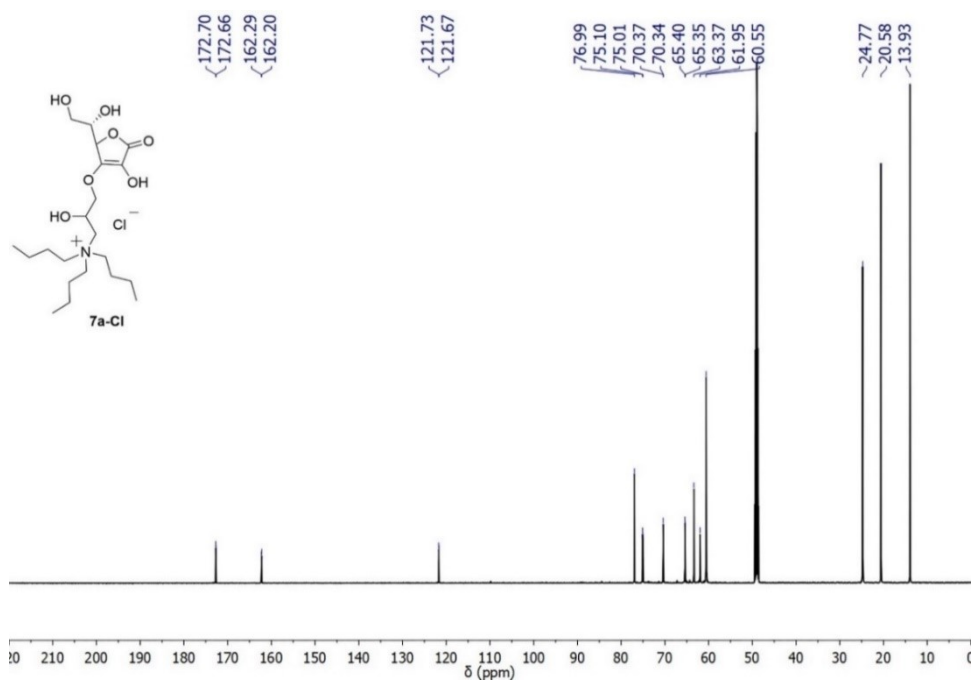

Figure S14. <sup>13</sup>C NMR (MeOD-d<sub>4</sub>) spectrum of compound 7a-Cl.

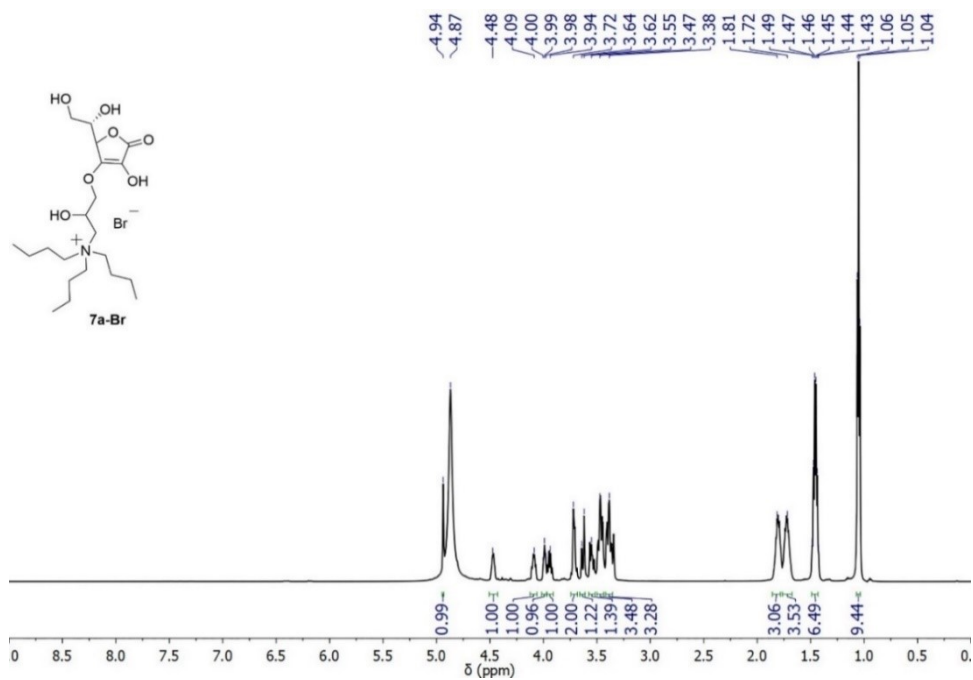

**Figure S15.**  $^1\text{H}$  NMR (MeOD- $d_4$ ) spectrum of compound **7a-Br**.

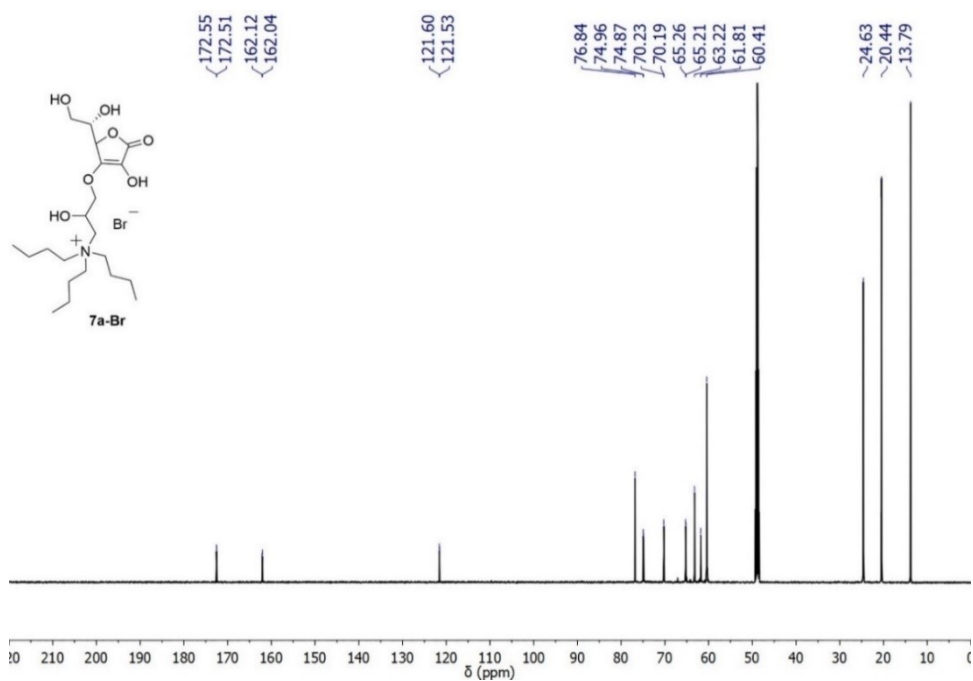

**Figure S16.**  $^{13}\text{C}$  NMR (MeOD- $d_4$ ) spectrum of compound **7a-Br**.



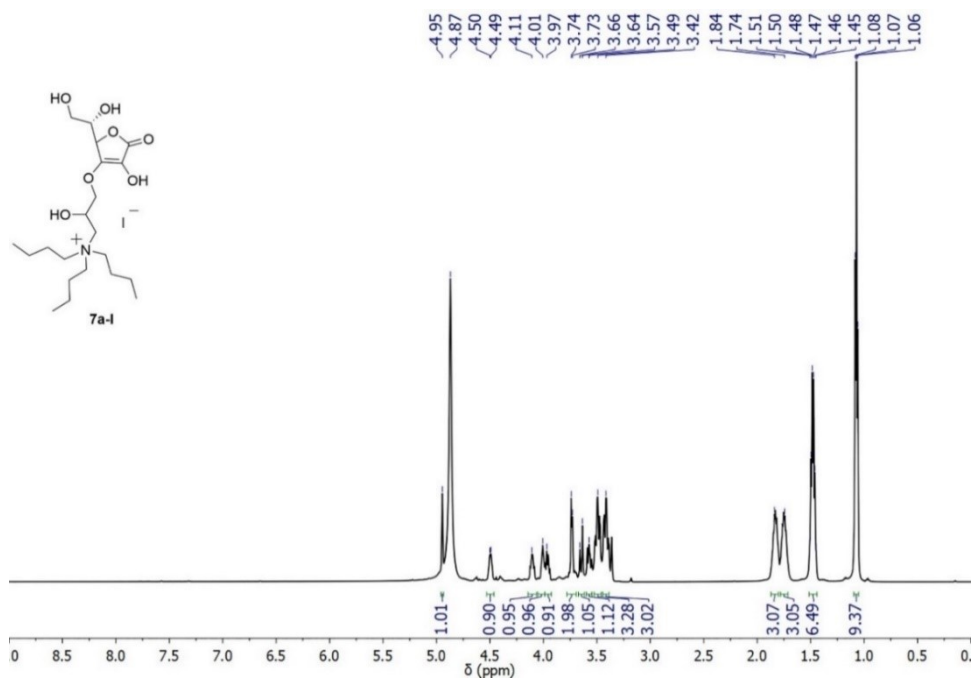

Figure S17. <sup>1</sup>H NMR (MeOD-d<sub>4</sub>) spectrum of compound 7a-I.

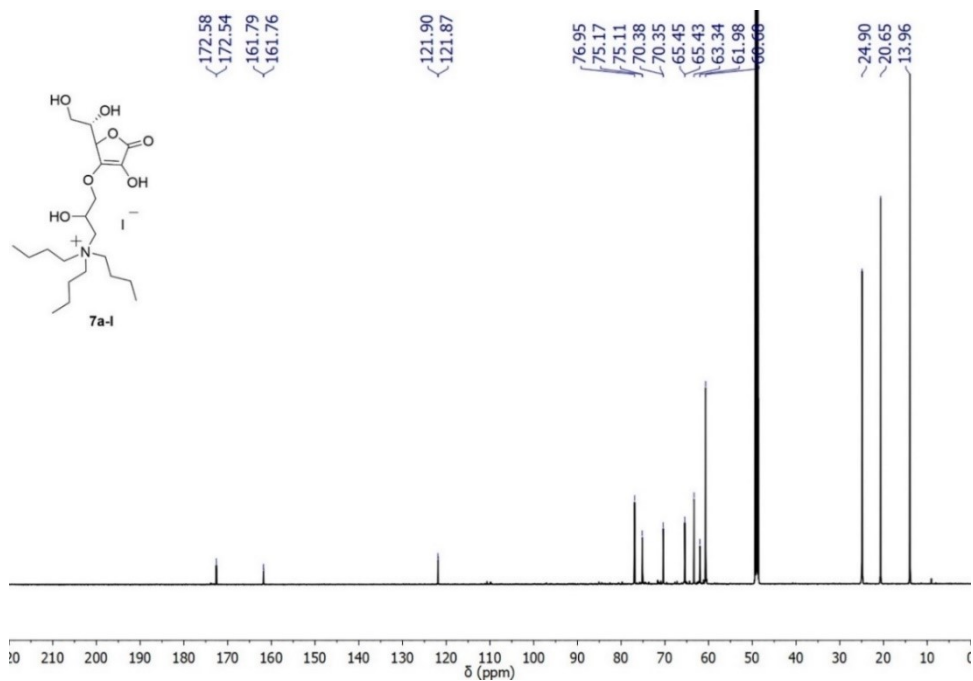

Figure S18. <sup>13</sup>C NMR (MeOD-d<sub>4</sub>) spectrum of compound 7a-I.

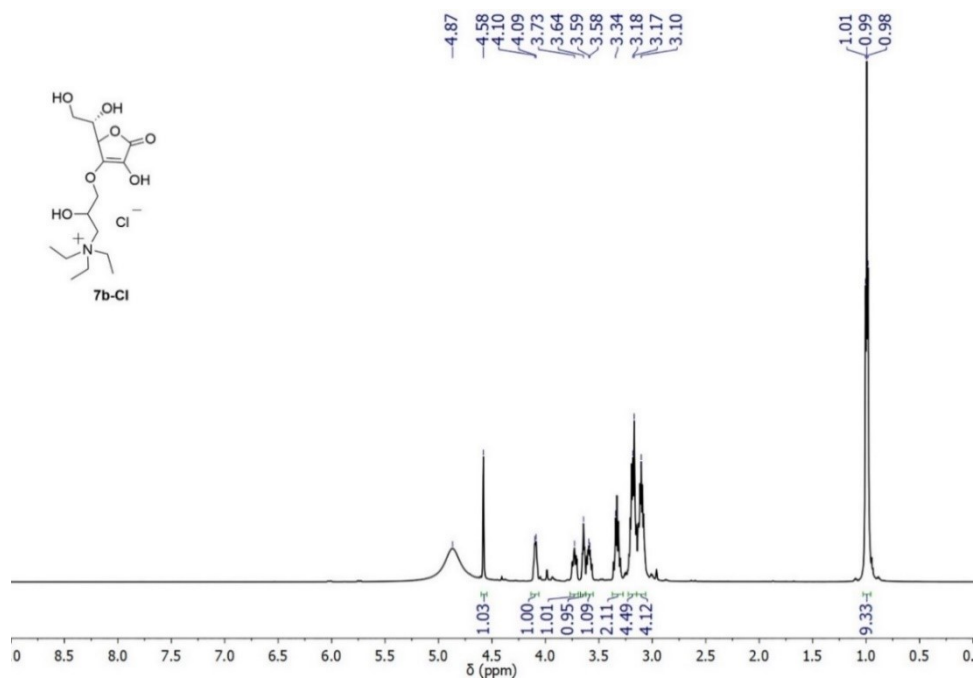

**Figure S19.**  $^1\text{H}$  NMR (MeOD- $d_4$ ) spectrum of compound **7b-Cl**.

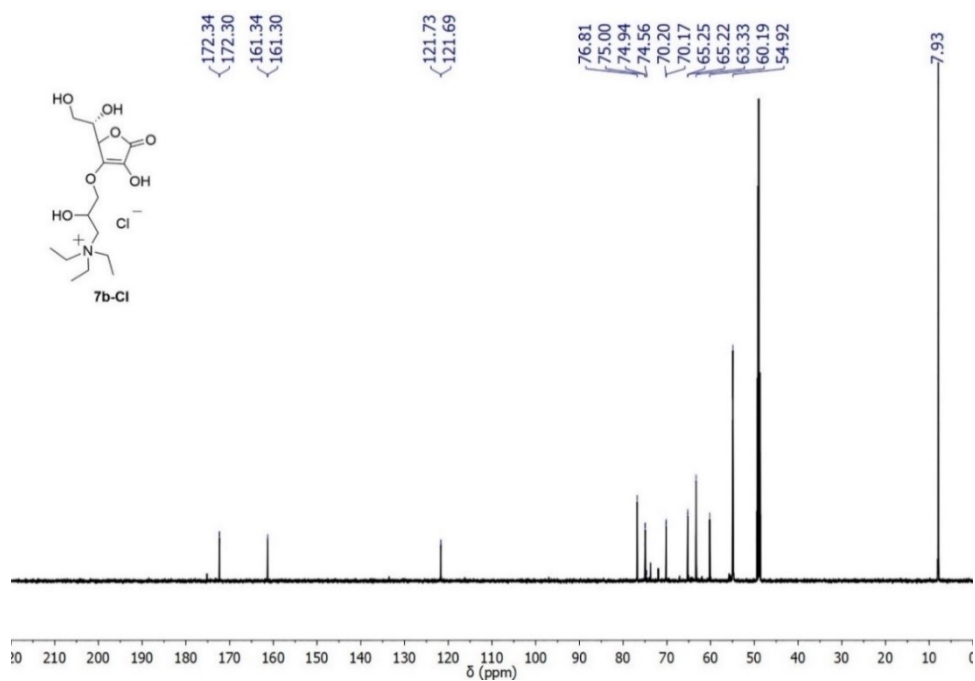

**Figure S20.**  $^{13}\text{C}$  NMR (MeOD- $d_4$ ) spectrum of compound **7b-Cl**.

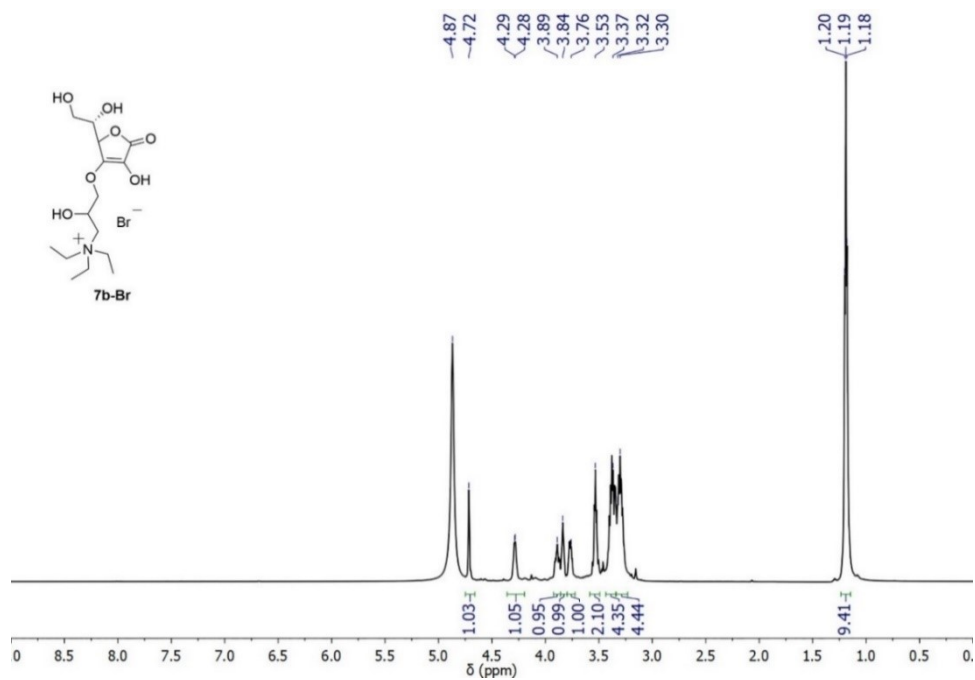

**Figure S21.**  $^1\text{H}$  NMR (MeOD- $d_4$ ) spectrum of compound **7b-Br**.

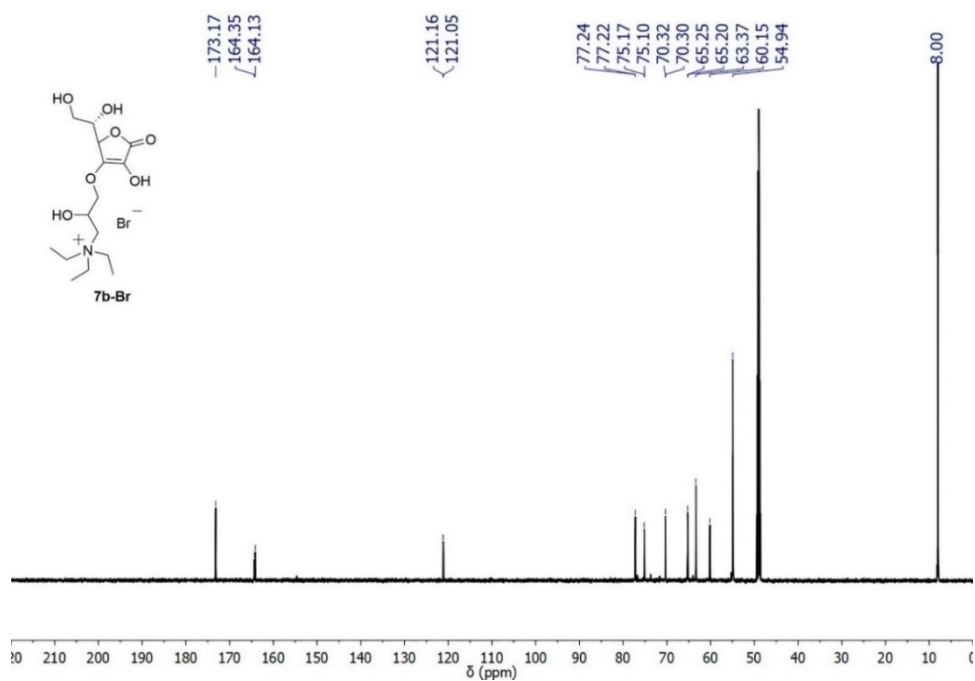

**Figure S22.**  $^{13}\text{C}$  NMR (MeOD- $d_4$ ) spectrum of compound **7b-Br**.

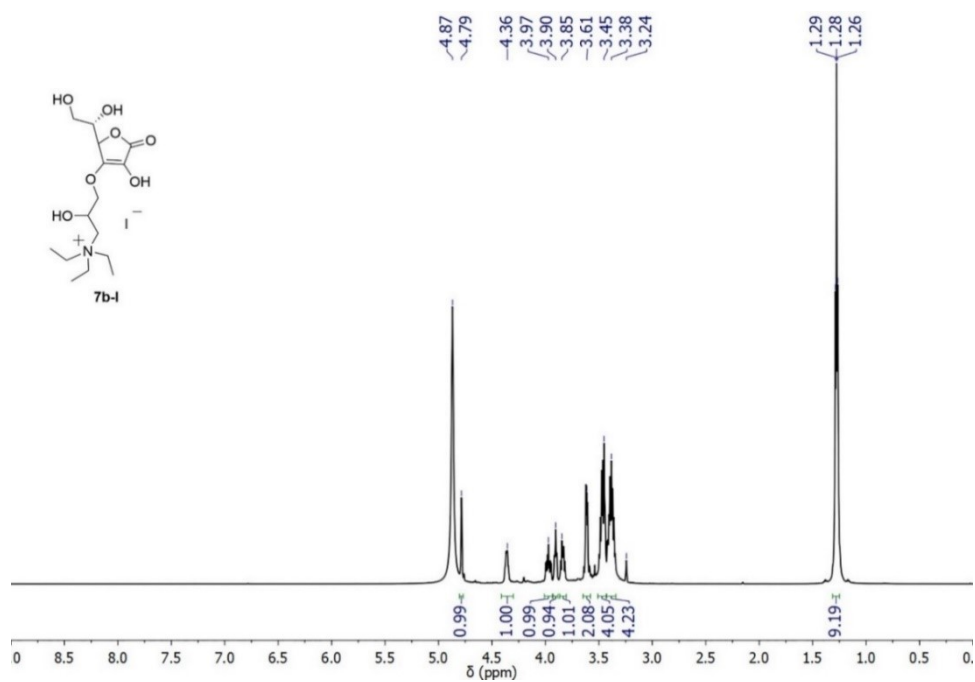

**Figure S23.** <sup>1</sup>H NMR (MeOD-d<sub>4</sub>) spectrum of compound 7b-I.

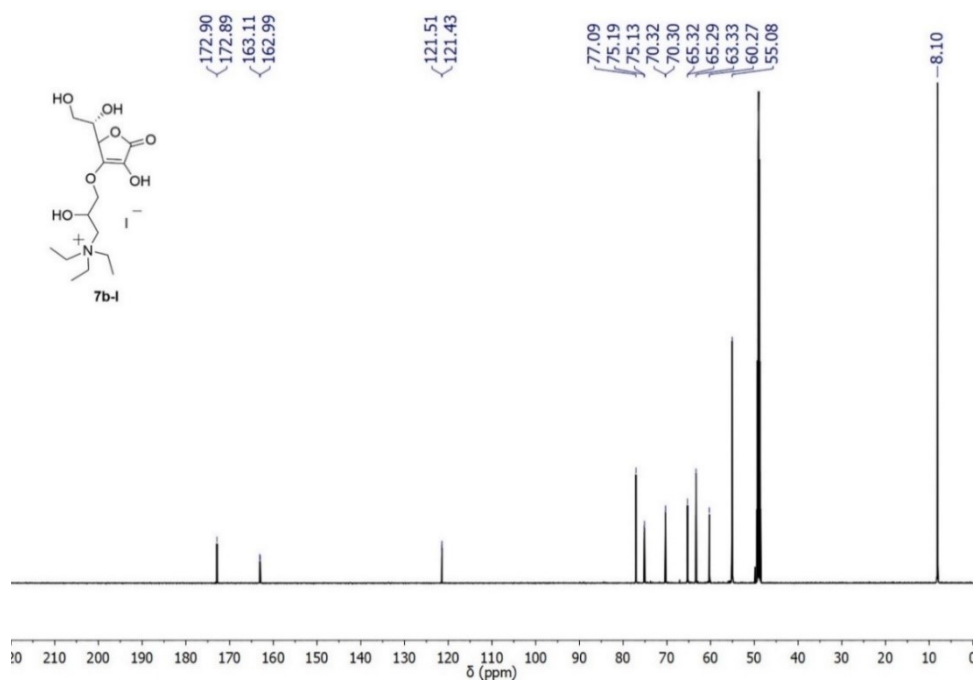

**Figure S24.** <sup>13</sup>C NMR (MeOD-d<sub>4</sub>) spectrum of compound 7b-I.

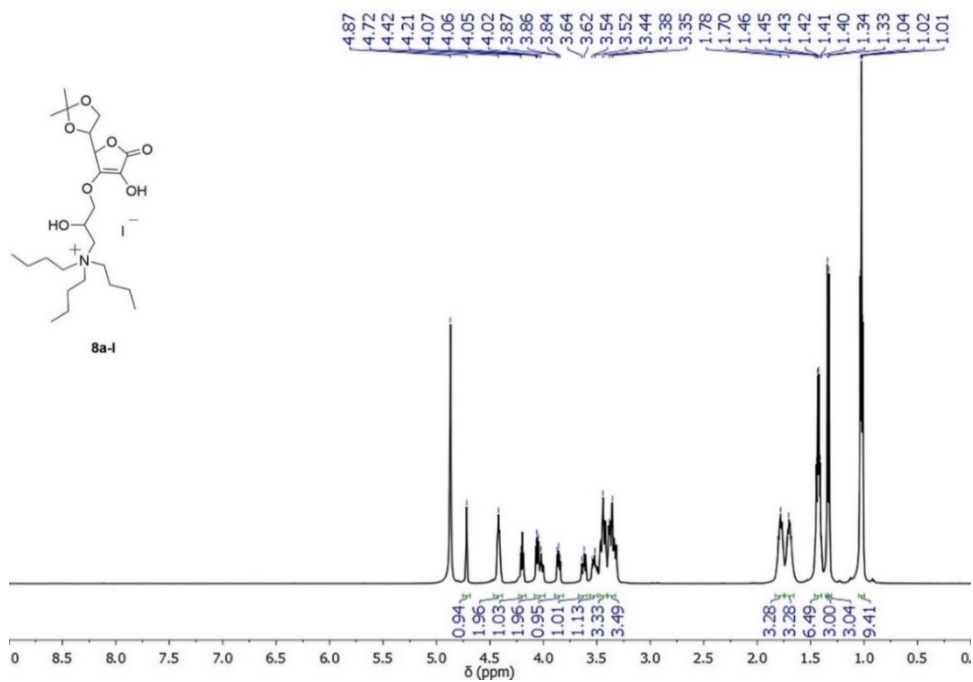

**Figure S25.**  $^1\text{H NMR}$  (MeOD- $d_4$ ) spectrum of compound **8a-I**

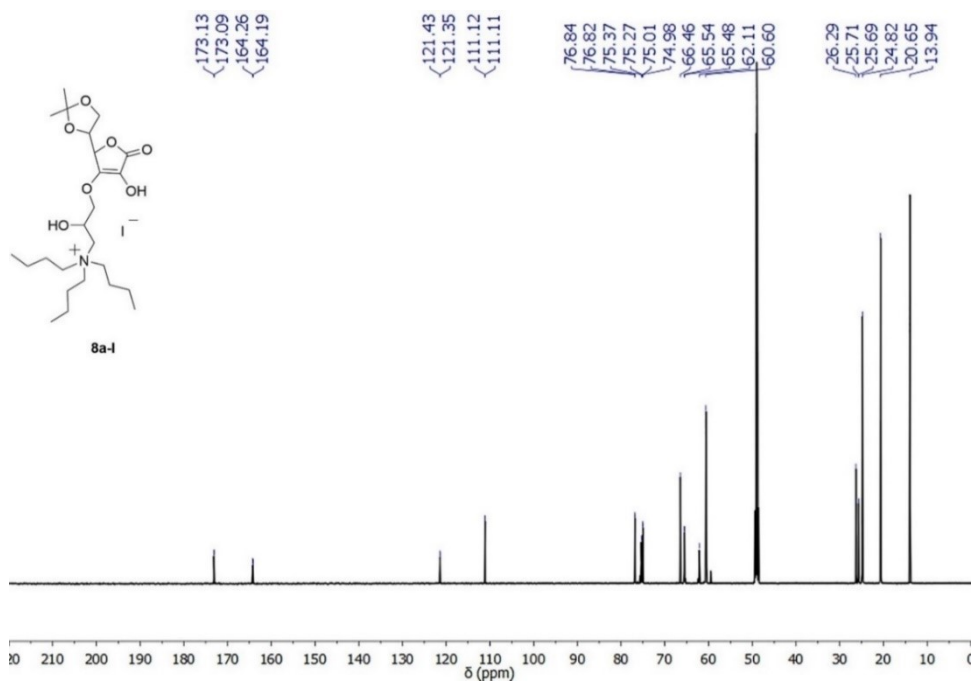

**Figure S26.**  $^{13}\text{C NMR}$  (MeOD- $d_4$ ) spectrum of compound **8a-I**

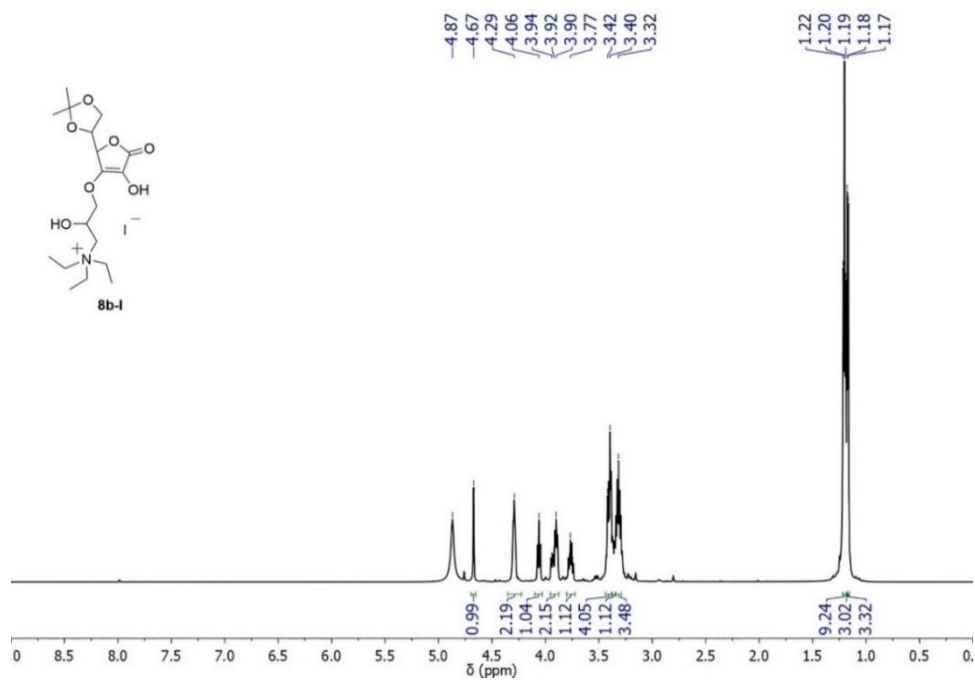

**Figure S27.**  $^1\text{H}$  NMR (MeOD- $d_4$ ) spectrum of compound **8b-I**

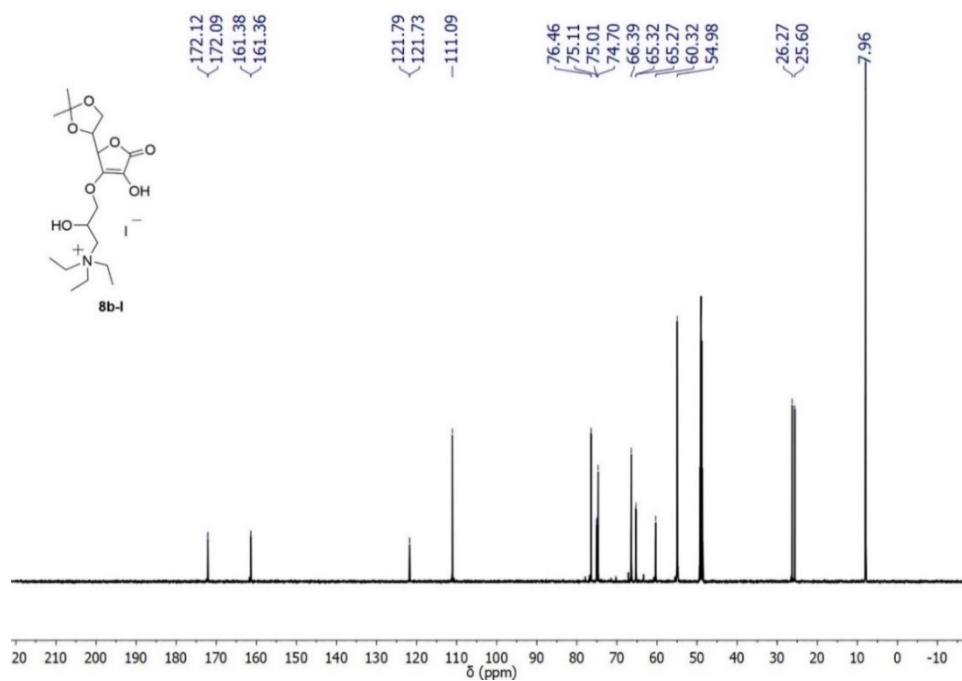

**Figure S28.**  $^{13}\text{C}$  NMR (MeOD- $d_4$ ) spectrum of compound **8b-I**

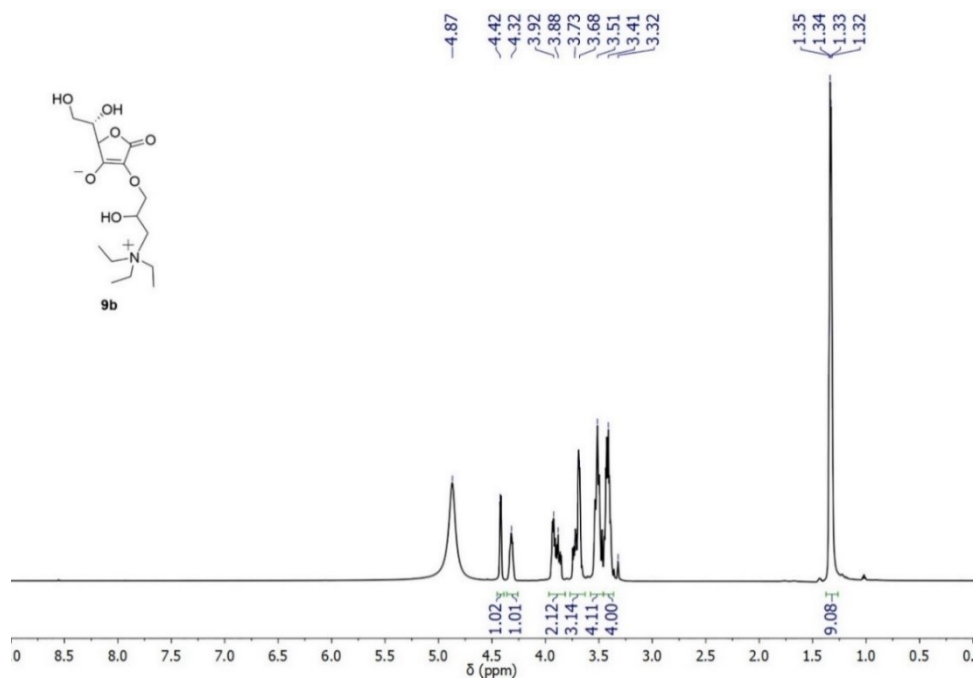

**Figure S29.** <sup>1</sup>H NMR (MeOD-d<sub>4</sub>) spectrum of compound **9b**

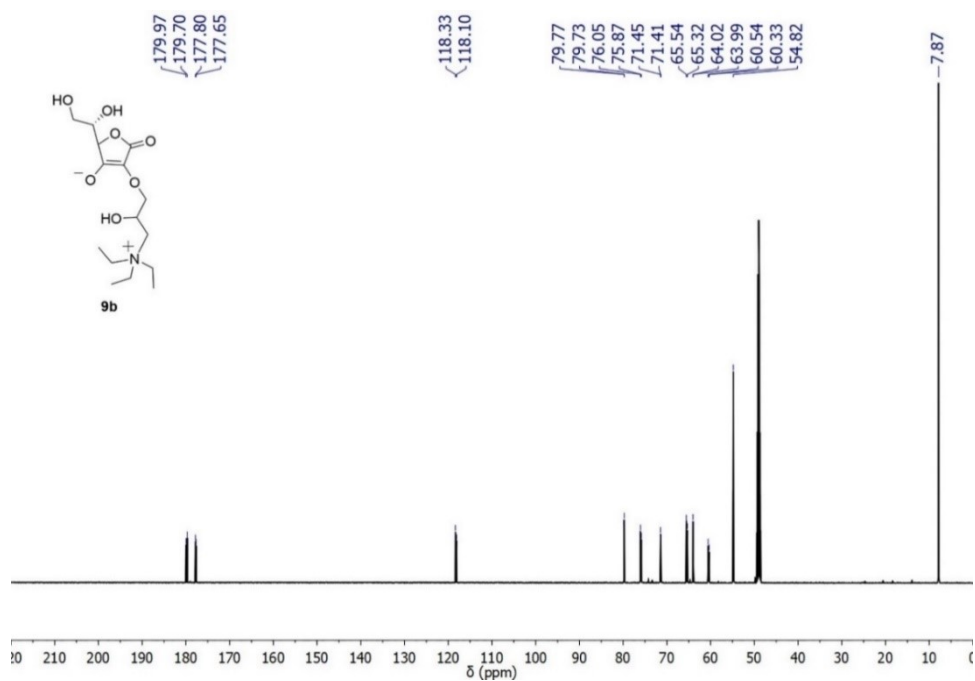

**Figure S30.** <sup>13</sup>C NMR (MeOD-d<sub>4</sub>) spectrum of compound **9b**

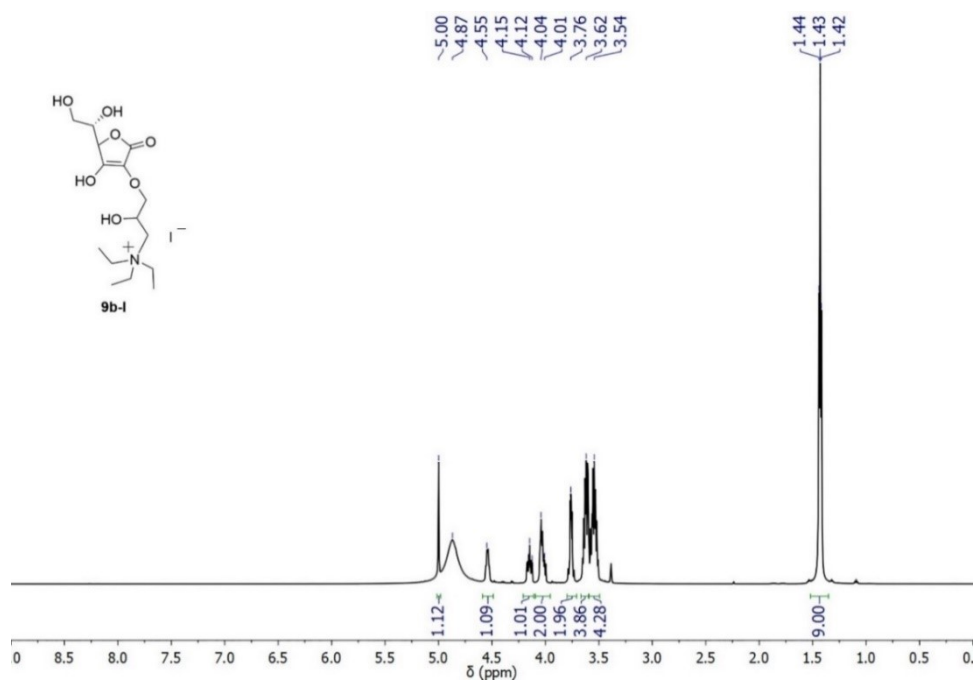

**Figure S31.** <sup>1</sup>H NMR (MeOD-d<sub>4</sub>) spectrum of compound **9b-I**

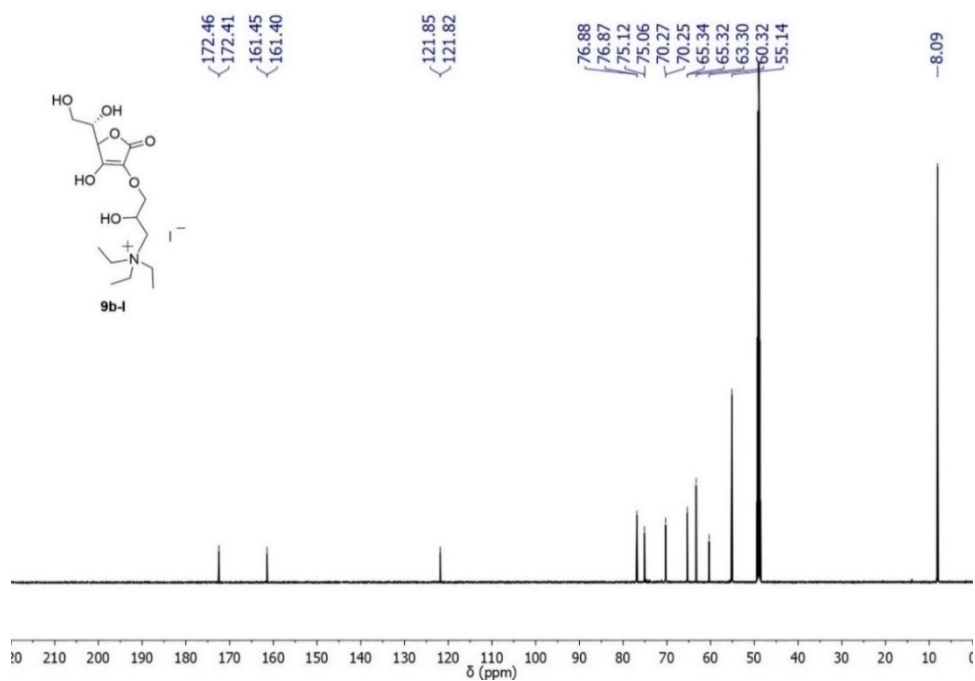

**Figure S32.** <sup>13</sup>C NMR (MeOD-d<sub>4</sub>) spectrum of compound **9b-I**



#### S4. Solubility of the Catalysts in Epoxides and Cyclic Carbonates

All compounds could be dissolved in water with a solubility of at least 0.5 g/mL or higher. The solubility of the most promising catalysts **7a-I**, **7b-I**, and **8b-I** in several epoxides and carbonates was assessed by <sup>1</sup>H NMR using 1,3,5-trimethoxybenzene as the internal standard.

Sample preparation: In the absence of added water, an excess of catalyst (about 1 g) was dispersed into 100 μL epoxide or cyclic carbonate in a microtube. The mixture was shaken and equilibrated at 250 rpm under ambient temperature for 24 hours. For the case of water/cyclic carbonate biphasic systems, the catalyst (about 1g) was dissolved in 50 μL of water per mmol of carbonate in a microtube followed by adding 100 μL of carbonate. The mixture was equilibrated at 250 rpm under ambient temperature for 24 hours. For analysis, an aliquot of 25 μL of the supernatant from each sample was transferred into an NMR tube containing 500 μL DMSO-d<sub>6</sub>. The quantification was carried out using 1,3,5-trimethoxybenzene as the internal standard. The concentration of soluble catalyst was calculated as in Equation (S1) based on the integration ratio of catalyst (a) and epoxide or cyclic carbonate (b) to the internal standard signal (δ 6.1 ppm, 3H).

Equation (S1):

$$\text{Solubility of catalyst} = \frac{I_a \times H_b \times MW_a}{I_b \times H_a \times MW_b}$$

Where  $I_a$  is the integral value of the protons signal of the catalyst,  $I_b$  is the integral value of the protons signal of an epoxide or cyclic carbonate,  $H_a$  is the number of protons of the catalyst,  $H_b$  is the number of protons of the epoxide or cyclic carbonate,  $MW_a$  is the molecular weight of the catalyst, and  $MW_b$  is the molecular weight of epoxide or cyclic carbonate.

**For example:** Calculation of catalyst **7a-I** in styrene oxide (**10a**)

$$\begin{aligned} \text{Solubility of } \mathbf{7a-I} &= \frac{I_{\mathbf{7a-I}} \times H_{\mathbf{10a}} \times MW_{\mathbf{7a-I}}}{I_{\mathbf{10a}} \times H_{\mathbf{7a-I}} \times MW_{\mathbf{10a}}} \\ &= \frac{0.40 \times 1 \times 545.45}{1.04 \times 9 \times 120.15} \\ &= 0.1940 \text{ g/g styrene oxide} \end{aligned}$$

∴ Solubility of **7a-I** = 194.01 mg/g **10a**

For terminal epoxides and carbonates, compound **7a-I** displayed some solubility in epoxide **10a** that was found to increase when the experiment was carried out at 60 °C, while no solubility in **11a** at room temperature was observed. **7a-I** displayed significant solubility in all terminal cyclic carbonates tested, indicating that this compound would be partially found in the product when used in biphasic reactions. On the other hand, **7b-I** was insoluble in any terminal epoxide at room temperature and 60 °C in **10a** and 80 °C in **11a**, while some low solubility was observed in epoxides **13a** and **14a** at 100 °C. Interestingly, compound **7b-I** was very sparingly soluble (carbonates **10b**, **13b**, **14b**) or insoluble (**11b**, **12b**) in terminal carbonates. The solubility of **7b-I** in the carbonate phase decreased further in the presence of a water layer in the system (the carbonate/water volumetric ratio was similar to the case of the biphasic catalytic reactions) due to repartition between the phases; this was also the case of terminal carbonate **15b**. Catalyst **8b-I**, with an acetal-protected ethyldiol side chain, was not soluble in epoxides **10a** and **11a** but was slightly more soluble in cyclic carbonates than **7b-I** as observed for the cases of carbonates **10b** and **11b**. Finally, all catalysts were insoluble in non-polar epoxidized fatty acid esters (**20a**, **22a**) and their carbonated products (**20b**, **22b**) due to the presence of long aliphatic chains.

**Table S1.** Solubility of catalysts in epoxides and cyclic carbonates under various conditions.

| Epoxide                                                                             | Solubility of catalyst <sup>a</sup><br>(mg/g epoxide) <sup>b</sup> |                                      |      | Cyclic carbonate                                                                     | Solubility of catalyst <sup>a</sup><br>(mg/g carbonate) <sup>b</sup> |                             |      |
|-------------------------------------------------------------------------------------|--------------------------------------------------------------------|--------------------------------------|------|--------------------------------------------------------------------------------------|----------------------------------------------------------------------|-----------------------------|------|
|                                                                                     | 7a-I                                                               | 7b-I                                 | 8b-I |                                                                                      | 7a-I                                                                 | 7b-I                        | 8b-I |
|  | 184±28<br>(308) <sup>c</sup>                                       | ND <sup>d</sup><br>(ND) <sup>e</sup> | ND   |  | >1000                                                                | 28±3<br>[25±2] <sup>e</sup> | 54±7 |
|  | ND                                                                 | ND<br>(ND) <sup>f</sup>              | ND   |  | >1000                                                                | ND                          | 16±3 |
|  | -                                                                  | ND                                   | -    |  | >1000                                                                | ND                          | -    |
|  | -                                                                  | ND<br>(35) <sup>g</sup>              | -    |  | >1000                                                                | 24±8<br>[4±2] <sup>e</sup>  | -    |
|  | -                                                                  | ND<br>(37) <sup>g</sup>              | -    |  | >1000                                                                | 22±3<br>[13±1] <sup>e</sup> | -    |
|  | ND                                                                 | ND                                   | ND   |  | ND                                                                   | ND                          | ND   |
|  | ND                                                                 | ND                                   | ND   |  | ND                                                                   | ND                          | ND   |

<sup>a</sup> Epoxide or carbonate (100 µl), **7a-I**, **7b-I** or **8b-I** at room temperature, 250 rpm for 24 h. <sup>b</sup> Determined by <sup>1</sup>H NMR (see section S4 of the supporting information and Fig. S33-S34) using 1,3,5 trimethoxybenzene as the internal standard in DMSO-d<sub>6</sub>. <sup>c</sup> Solubility in the epoxide at 60 °C. <sup>d</sup> ND: Not detected by <sup>1</sup>H-NMR measurement. <sup>e</sup> Solubility in the carbonate phase (100 µl) in the presence of 4 mol% **7b-I** and of 50 µL of water/mmol carbonate (30-40 µL of water depending on the epoxide). <sup>f</sup> Solubility in the epoxide at 80 °C. <sup>g</sup> Solubility in the epoxide at 100 °C.

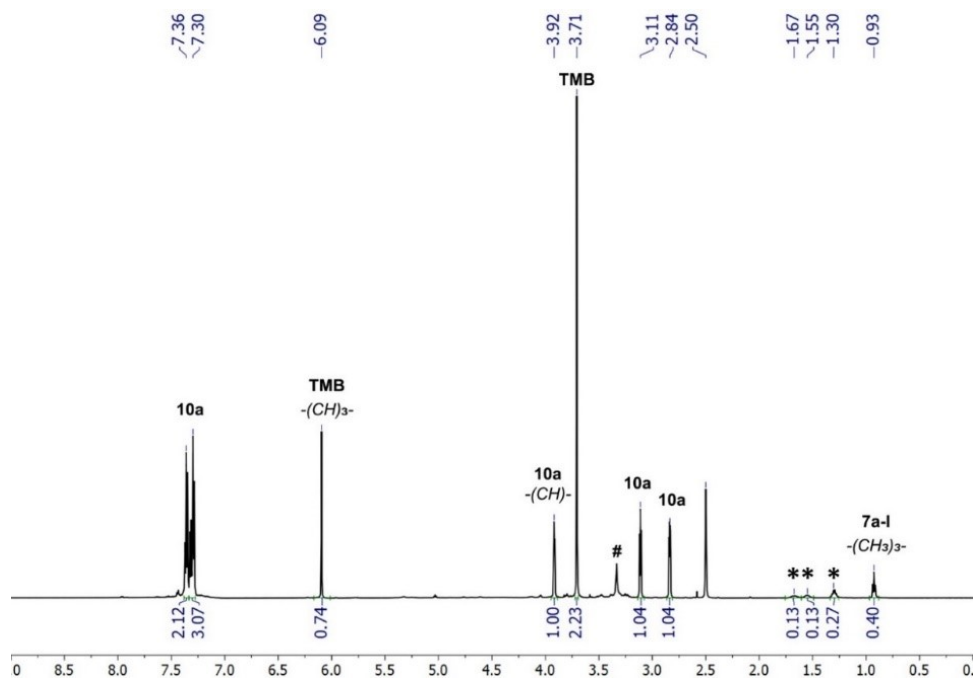

**Figure S33.**  $^1\text{H}$  NMR ( $\text{DMSO-d}_6$ ) solubility measurement of catalyst **7a-I** (\*) in **10a** using 1,3,5 trimethoxy benzene (TMB) as internal standard. (#) residual water signal in  $\text{DMSO-d}_6$ .

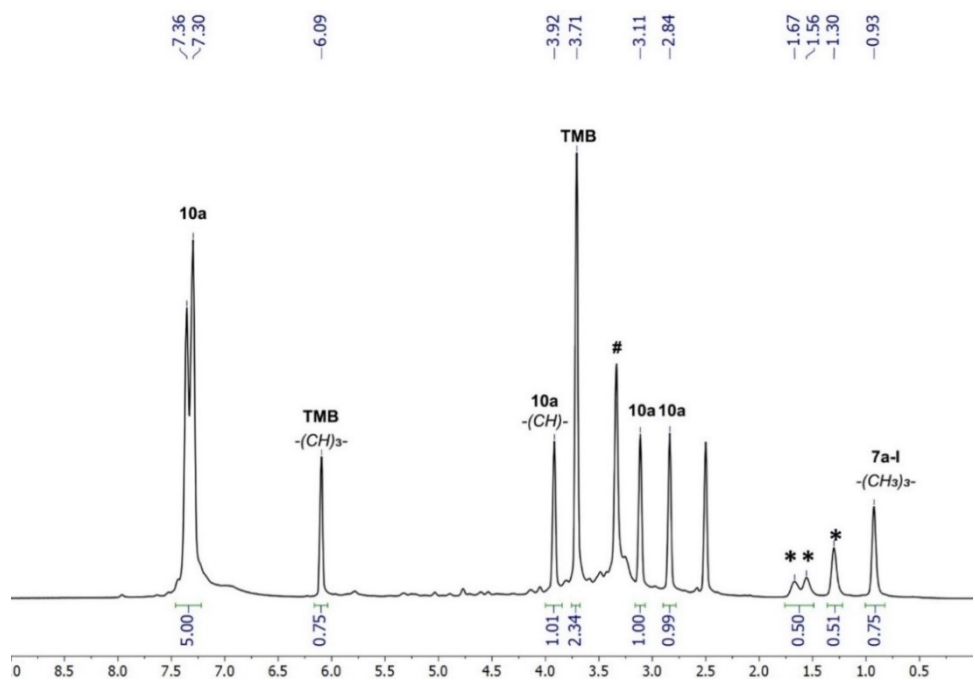

**Figure S34.**  $^1\text{H}$  NMR ( $\text{DMSO-d}_6$ ) solubility measurement of catalyst **7a-I** (\*) in **10a** at 60 °C using 1,3,5 trimethoxy benzene (TMB) as internal standard. (#) residual water signal in  $\text{DMSO-d}_6$ .

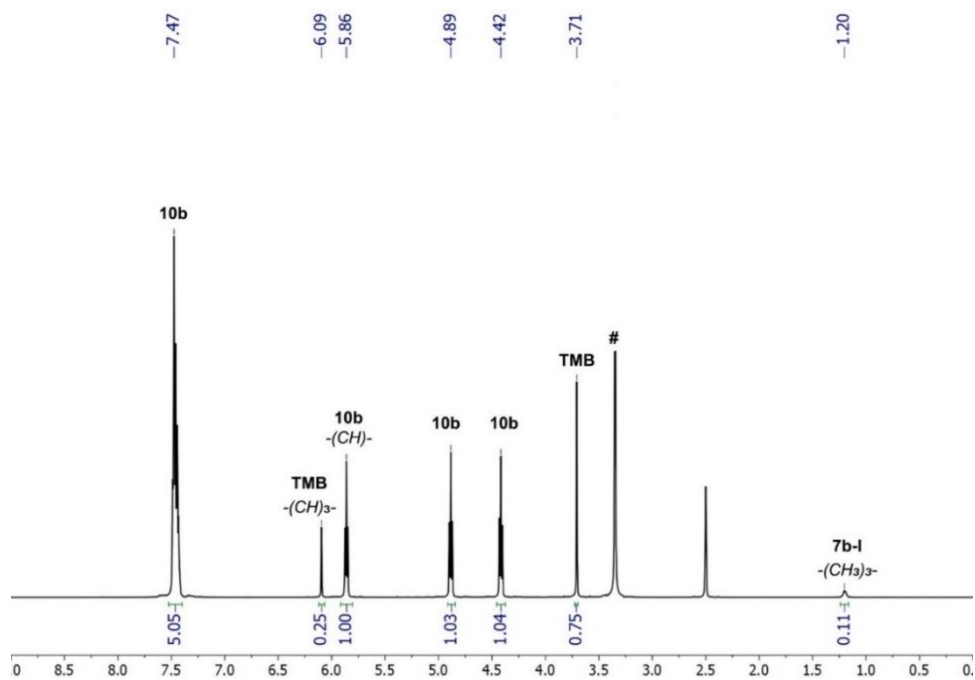

**Figure S35.** <sup>1</sup>H NMR (DMSO-d<sub>6</sub>) solubility measurement of catalyst **7b-I** in **10b** using 1,3,5 trimethoxy benzene (TMB) as internal standard. (#) residual water signal in DMSO-d<sub>6</sub>.

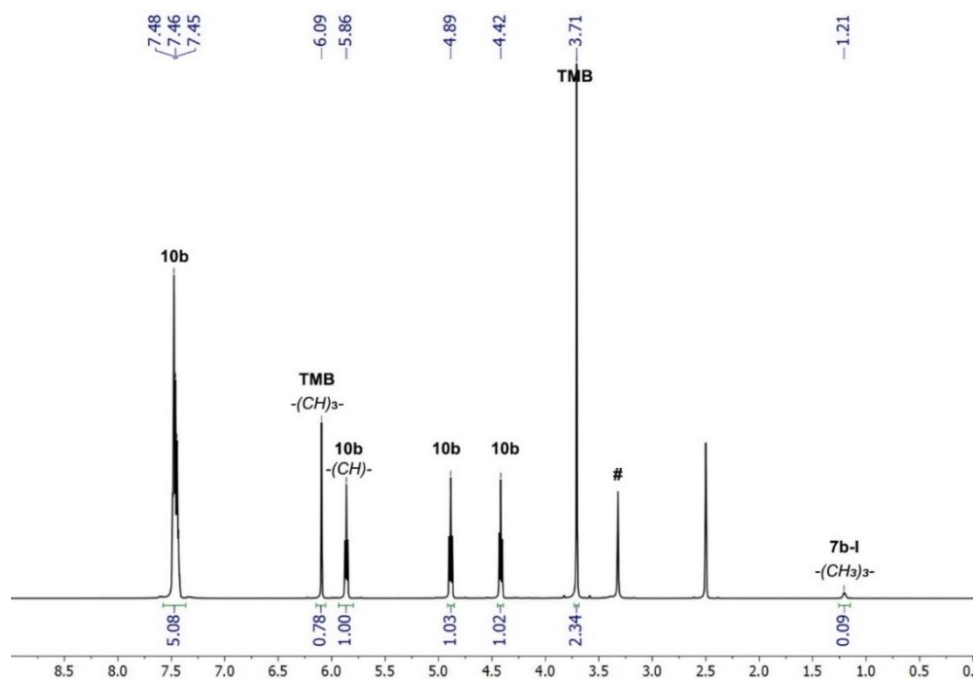

**Figure S36.** <sup>1</sup>H NMR (DMSO-d<sub>6</sub>) solubility measurement of catalyst **7b-I** in **10b** and 50 μL of water/mmol carbonate using 1,3,5 trimethoxy benzene (TMB) as internal standard. (#) residual water signal in DMSO-d<sub>6</sub>.

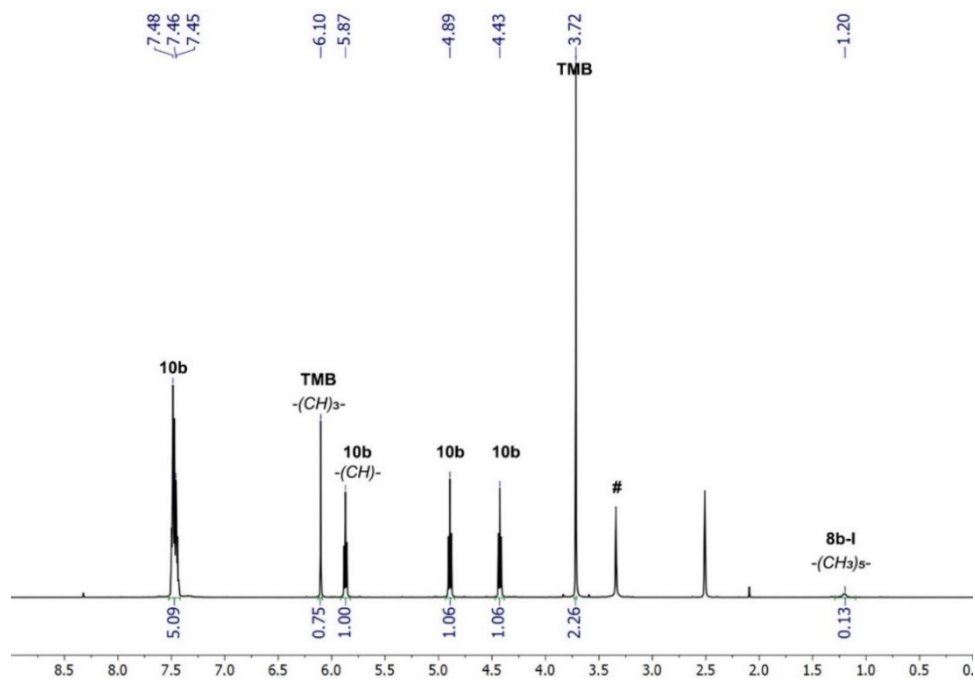

**Figure S37.**  $^1\text{H}$  NMR ( $\text{DMSO-d}_6$ ) solubility measurement of catalyst **8b-I** in **10b** using 1,3,5 trimethoxy benzene (TMB) as internal standard. (#) residual water signal in  $\text{DMSO-d}_6$ .

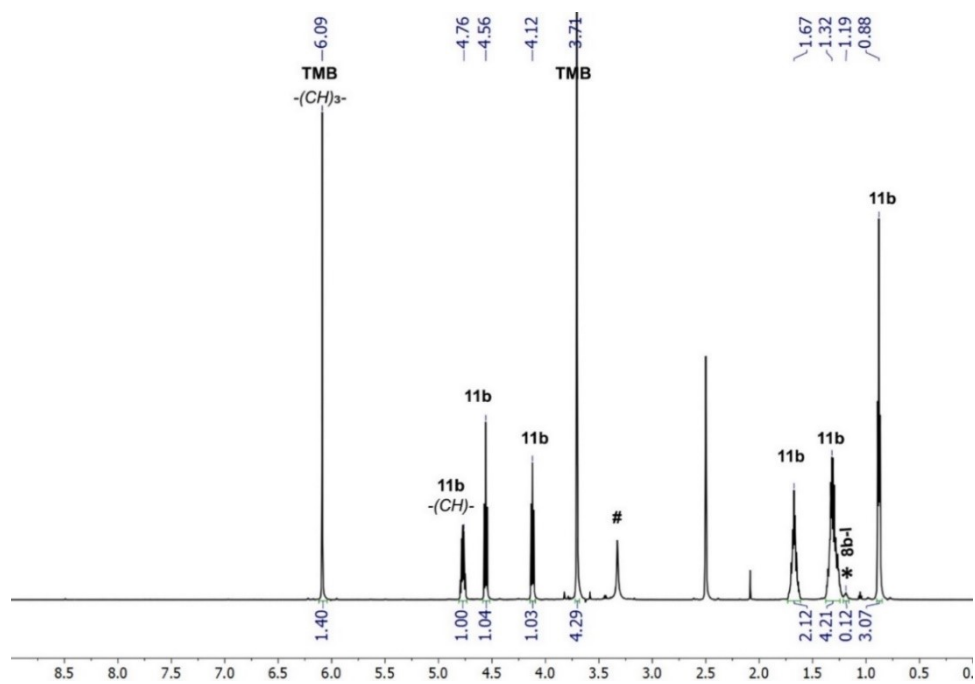

**Figure S38.**  $^1\text{H}$  NMR ( $\text{DMSO-d}_6$ ) solubility measurement of catalyst **8b-I** in **11b** using 1,3,5 trimethoxy benzene (TMB) as internal standard. (#) residual water signal in  $\text{DMSO-d}_6$ .

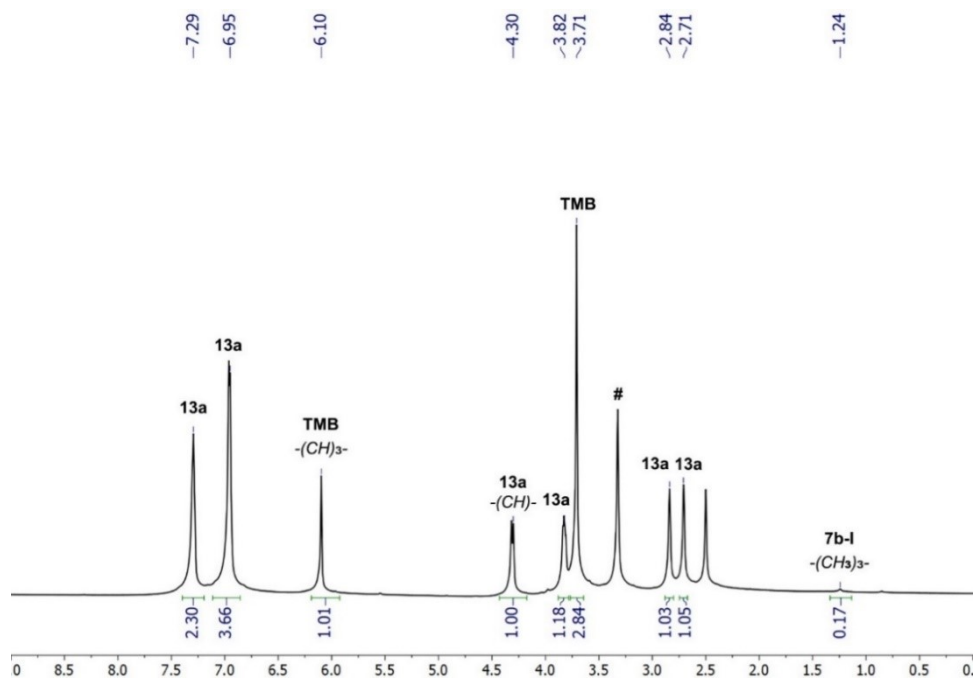

**Figure S39.**  $^1\text{H}$  NMR ( $\text{DMSO-d}_6$ ) solubility measurement of catalyst **7b-I** in **13a** at 100 °C using 1,3,5 trimethoxy benzene (TMB) as internal standard. (#) residual water signal in  $\text{DMSO-d}_6$ .

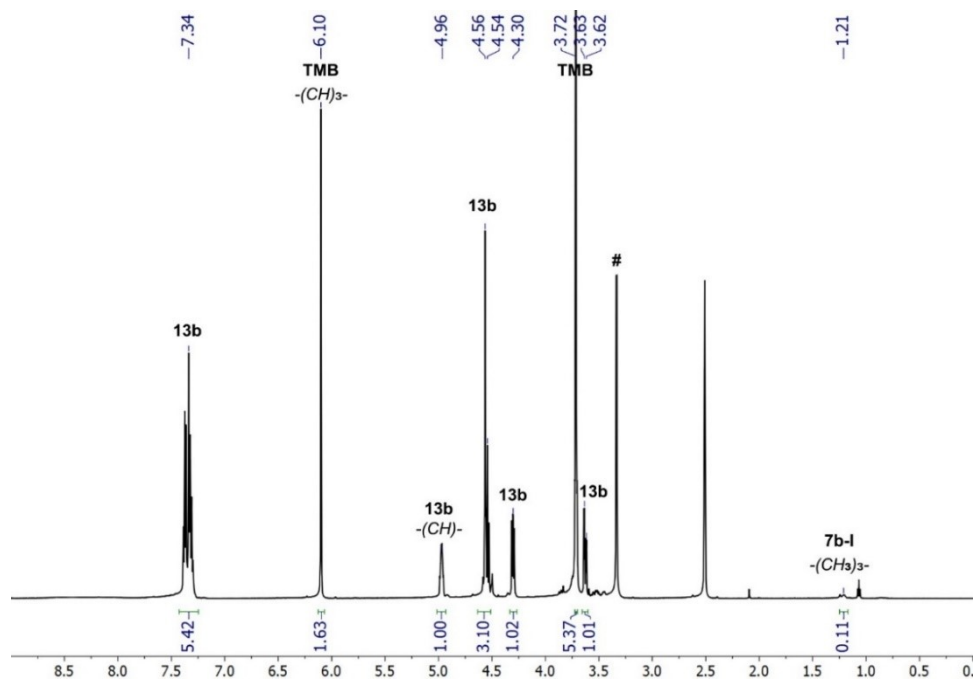

**Figure S40.**  $^1\text{H}$  NMR ( $\text{DMSO-d}_6$ ) solubility measurement of catalyst **7b-I** in **13b** using 1,3,5 trimethoxy benzene (TMB) as internal standard. (#) residual water signal in  $\text{DMSO-d}_6$ .

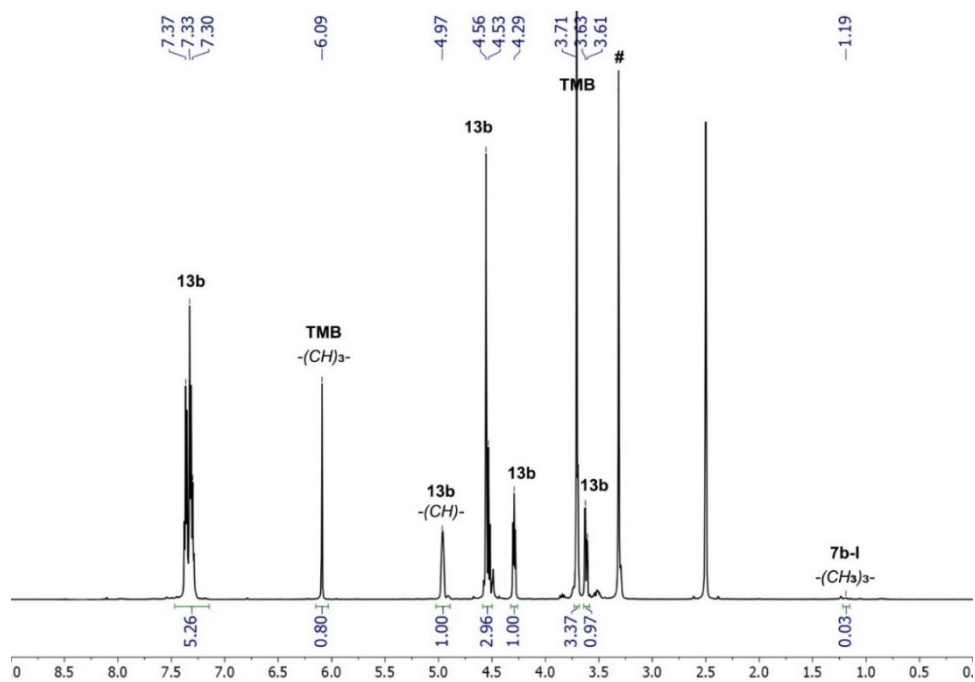

**Figure S41.**  $^1\text{H}$  NMR ( $\text{DMSO-d}_6$ ) solubility measurement of catalyst **7b-I** in **13b** and 50  $\mu\text{L}$  of water/mmol carbonate using 1,3,5 trimethoxy benzene (TMB) as internal standard. (#) residual water signal in  $\text{DMSO-d}_6$ .

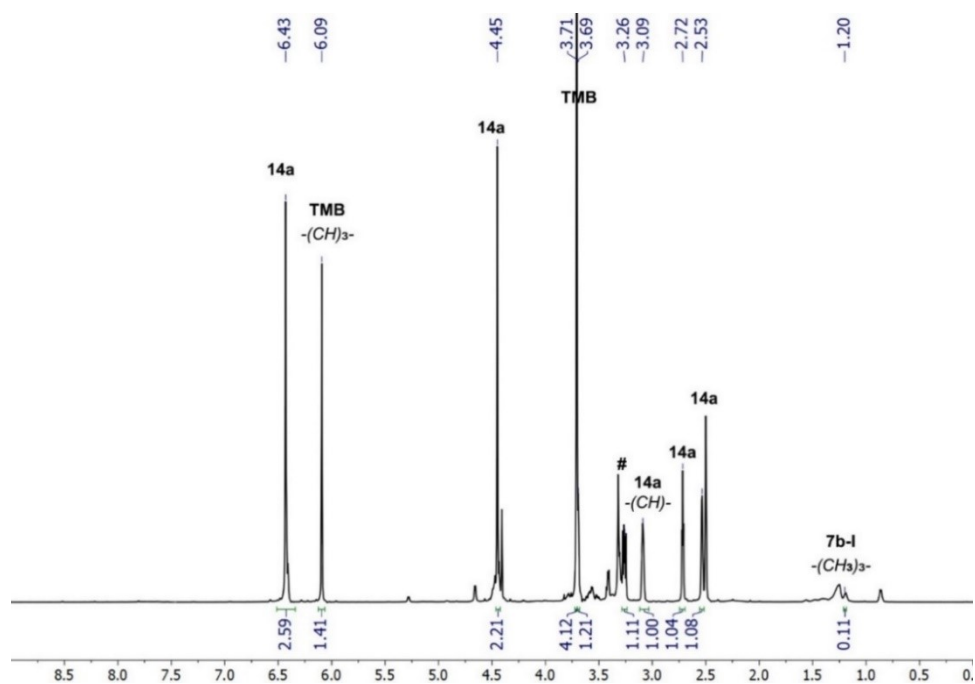

**Figure S42.**  $^1\text{H}$  NMR ( $\text{DMSO-d}_6$ ) solubility measurement of catalyst **7b-I** in **14a** at 100  $^\circ\text{C}$  using 1,3,5 trimethoxy benzene (TMB) as internal standard. (#) residual water signal in  $\text{DMSO-d}_6$ .

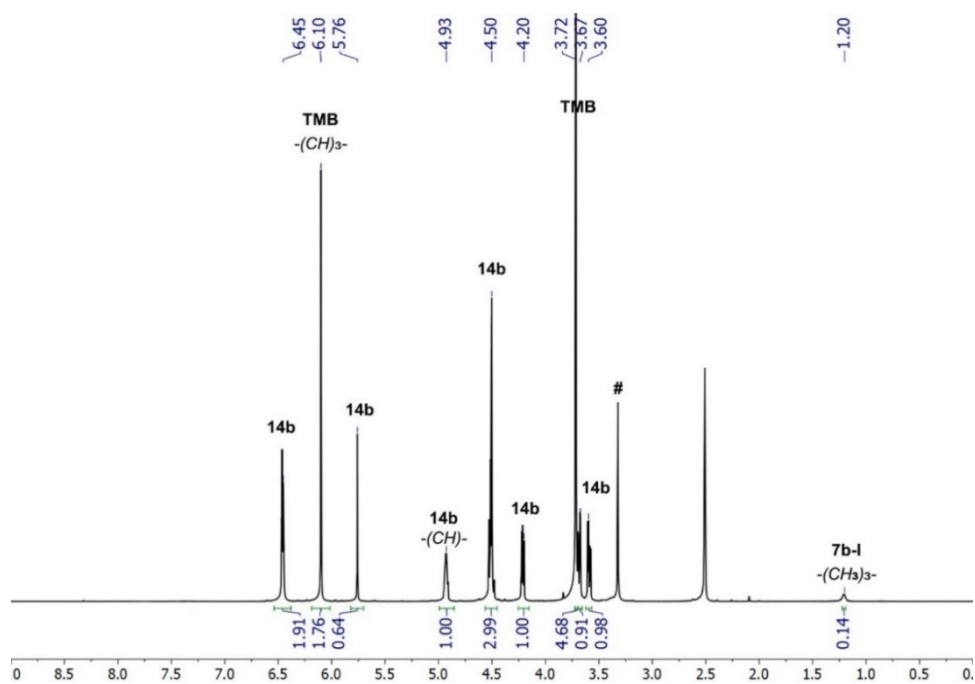

**Figure S43.**  $^1\text{H}$  NMR ( $\text{DMSO-d}_6$ ) solubility measurement of catalyst **7b-I** in **14b** using 1,3,5 trimethoxy benzene (TMB) as internal standard. (#) residual water signal in  $\text{DMSO-d}_6$ .

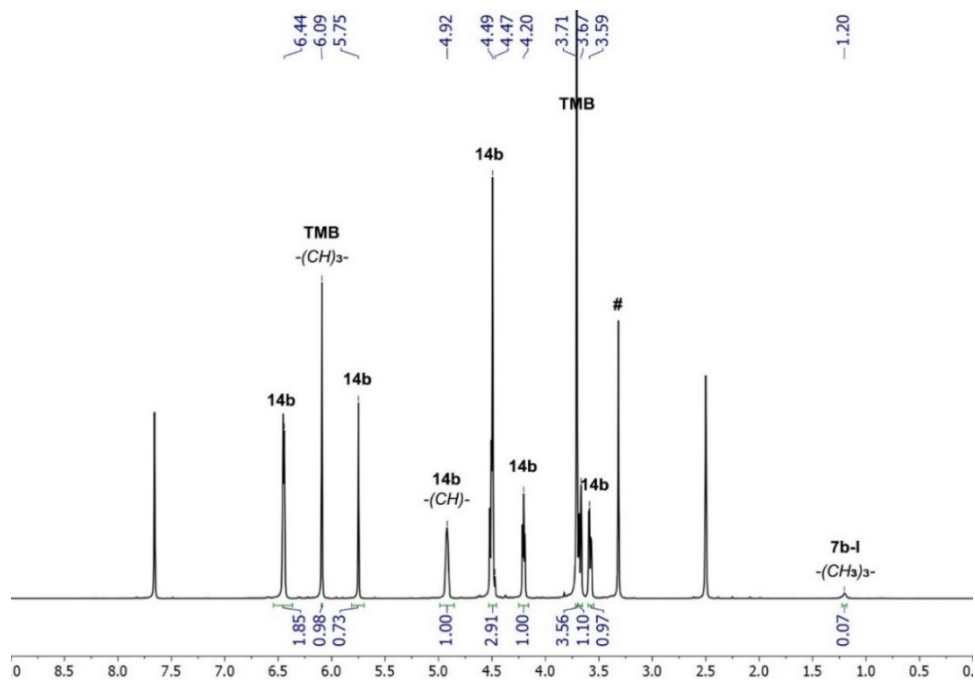

**Figure S44.**  $^1\text{H}$  NMR ( $\text{DMSO-d}_6$ ) solubility measurement of catalyst **7b-I** in **14b** and 50  $\mu\text{L}$  of water/mmol carbonate using 1,3,5 trimethoxy benzene (TMB) as internal standard. (#) residual water signal in  $\text{DMSO-d}_6$ .



## S5. General Procedure for the Synthesis of Cyclic Carbonates

### 5.1 CO<sub>2</sub> coupling reactions with epoxides at atmospheric pressure (1 bar)

Epoxide substrate (10 mmol), a stirring bar, 4 mol% (0.04 equiv.) of catalyst, and water (0-0.5 mL) were added into a 50 mL round bottom Schlenk flask. A rubber balloon containing CO<sub>2</sub> was connected to the Schlenk flask and part of the CO<sub>2</sub> was used for flushing the flask to replace air. The reaction vessel was well sealed to prevent losses of CO<sub>2</sub>. The reaction mixture was stirred and heated at atmospheric pressure at the desired temperature. At the end of the reaction, an aliquot of the reaction mixture was analyzed by <sup>1</sup>H NMR to determine substrate conversion and selectivity. <sup>1</sup>H NMR spectra of crude products of the organic phases are shown in Figures S46-S61.

### 5.2 High-pressure reactions in biphasic systems (10-30 bar)

The epoxide substrate (10 mmol), catalyst (4 mol%; 0.04 equiv.), and deionized water (0-2 mL) were placed inside a 75 mL stainless steel autoclave containing a magnetic stirring bar. The autoclave was sealed and pressurized with CO<sub>2</sub> (10-30 bar), heated at the desired temperature (generally 60-100 °C for terminal epoxides, 100-120 °C for internal epoxides), and stirred for the desired reaction time. At the end of each run, the autoclave was cooled in an ice bath and carefully vented. Phase separation between the organic phase and the aqueous phase was generally observed. Then, the whole reaction mixture was carefully withdrawn using a glass Pasteur pipette and the aqueous phase was discarded. The obtained product was analyzed by <sup>1</sup>H NMR to calculate conversion and selectivity. <sup>1</sup>H NMR spectra of crude products in the separated organic phases are shown in Figures S62-S146. For the scale-up process (50 mmol of epoxide), a 200 mL stainless steel autoclave was used.

### 5.3 Recycling of the aqueous layer

The separation of the aqueous layer was carried out as in the procedure reported above. The used aqueous layer was readded into a reaction autoclave that was refilled with fresh substrate and the reactor pressurized again with CO<sub>2</sub>.

## S6. Kinetic profiles for Styrene Carbonate Synthesis Monitored by <sup>1</sup>H NMR

The kinetic comparison for the cycloaddition reaction of styrene oxide and CO<sub>2</sub> catalyzed by **7a-I** versus the previously reported binary system of ascorbic acid/TBAI<sup>3</sup> was performed under solvent-free conditions at 60 °C and 1 bar CO<sub>2</sub>. <sup>1</sup>H NMR spectra were measured to observe epoxide conversion and selectivity after 2, 4, 6, 8, 12, and 24 hours as shown in Table S2 and Figure S45.

**Table S2** Comparison of catalyst activity at various reaction times.<sup>a</sup>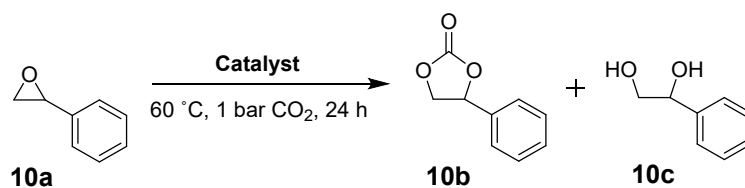

| Entry | Catalyst (mol%) | Additive (mol%) | Temp. (°C) | P <sub>CO2</sub> (bar) | Time (h) | Conversion <sup>b</sup> (%) ± S.D | Selectivity <sup>c</sup> (%) ± S.D |
|-------|-----------------|-----------------|------------|------------------------|----------|-----------------------------------|------------------------------------|
| 1     | AsA (4)         | TBAI (4)        | 60         | 1                      | 2        | 19±1                              | 85±1                               |
| 2     | AsA (4)         | TBAI (4)        | 60         | 1                      | 4        | 45±1                              | 94±1                               |
| 3     | AsA (4)         | TBAI (4)        | 60         | 1                      | 6        | 64±1                              | 95±1                               |
| 4     | AsA (4)         | TBAI (4)        | 60         | 1                      | 8        | 71±1                              | 97±1                               |
| 5     | AsA (4)         | TBAI (4)        | 60         | 1                      | 12       | 82±1                              | 98±1                               |
| 6     | AsA (4)         | TBAI (4)        | 60         | 1                      | 24       | 86±1                              | 95±1                               |
| 7     | <b>7a-I</b> (4) | -               | 60         | 1                      | 2        | 19±1                              | 78±1                               |
| 8     | <b>7a-I</b> (4) | -               | 60         | 1                      | 4        | 60±1                              | 87±1                               |
| 9     | <b>7a-I</b> (4) | -               | 60         | 1                      | 6        | 72±1                              | 94±1                               |
| 10    | <b>7a-I</b> (4) | -               | 60         | 1                      | 8        | 81±1                              | 96±1                               |
| 11    | <b>7a-I</b> (4) | -               | 60         | 1                      | 12       | 89±1                              | 98±1                               |
| 12    | <b>7a-I</b> (4) | -               | 60         | 1                      | 24       | 97±1                              | 98±1                               |

<sup>a</sup> Epoxide (10 mmol), Catalyst (4 mol%) at 60 °C, 1 bar CO<sub>2</sub>, without solvent for 24 h. <sup>b</sup> Determined by <sup>1</sup>H NMR in CDCl<sub>3</sub>. <sup>c</sup> Refers to the selectivity for cyclic carbonates (**10b**) versus 1,2-diol (**10c**).

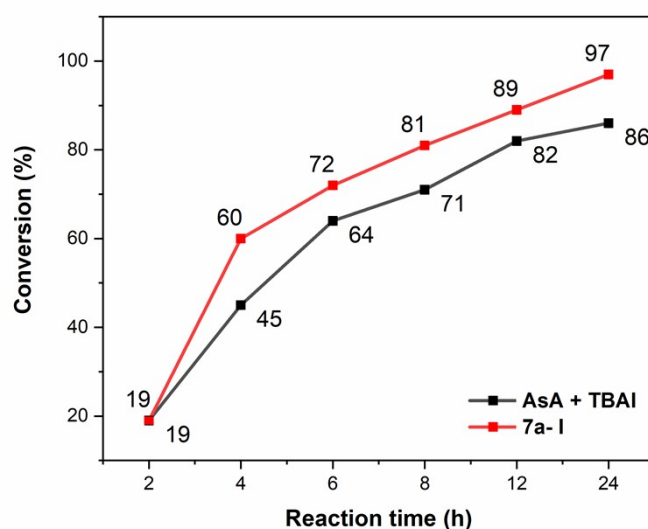**Figure S45.** Kinetic profiles of styrene oxide conversion in the CO<sub>2</sub> cycloaddition reaction catalysed by the binary system of ascorbic acid/TBAI (black line) and **7a-I** (red line).

## S7. <sup>1</sup>H NMR Spectra of Crude Reaction

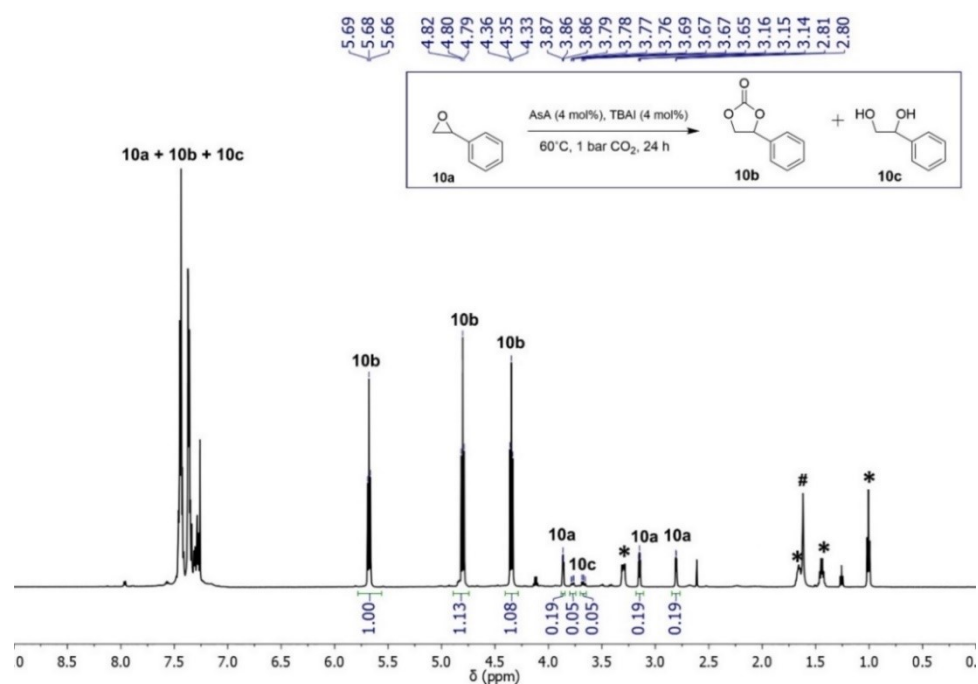

**Figure S46.** <sup>1</sup>H NMR (CDCl<sub>3</sub>) spectrum of crude CO<sub>2</sub> cycloaddition reaction to **10a**; **10a** (10 mmol), 4 mol% Ascorbic acid, 4 mol% TBAI (\*), solvent-free, 60 °C, 1 bar CO<sub>2</sub> (balloon), 24 h; Table 1, Entry 2. (#) residual water signal in CDCl<sub>3</sub>.

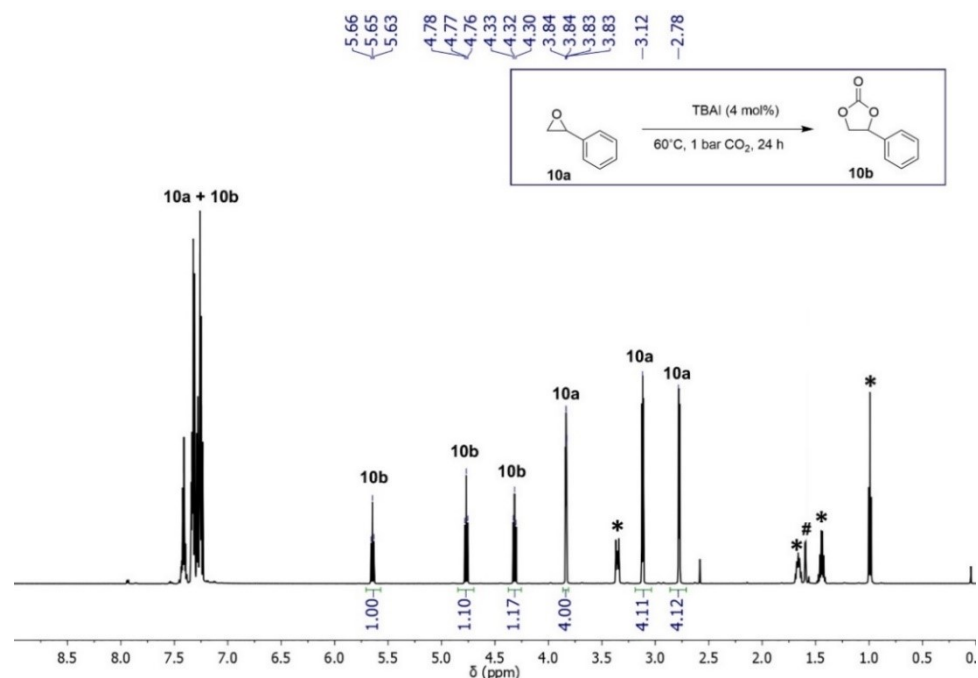

**Figure S47.** <sup>1</sup>H NMR (CDCl<sub>3</sub>) spectrum of crude CO<sub>2</sub> cycloaddition reaction to **10a**; **10a** (10 mmol), 4 mol% TBAI (\*), solvent-free, 60 °C, 1 bar CO<sub>2</sub> (balloon), 24 h; Table 1, Entry 3. (#) residual water signal in CDCl<sub>3</sub>.

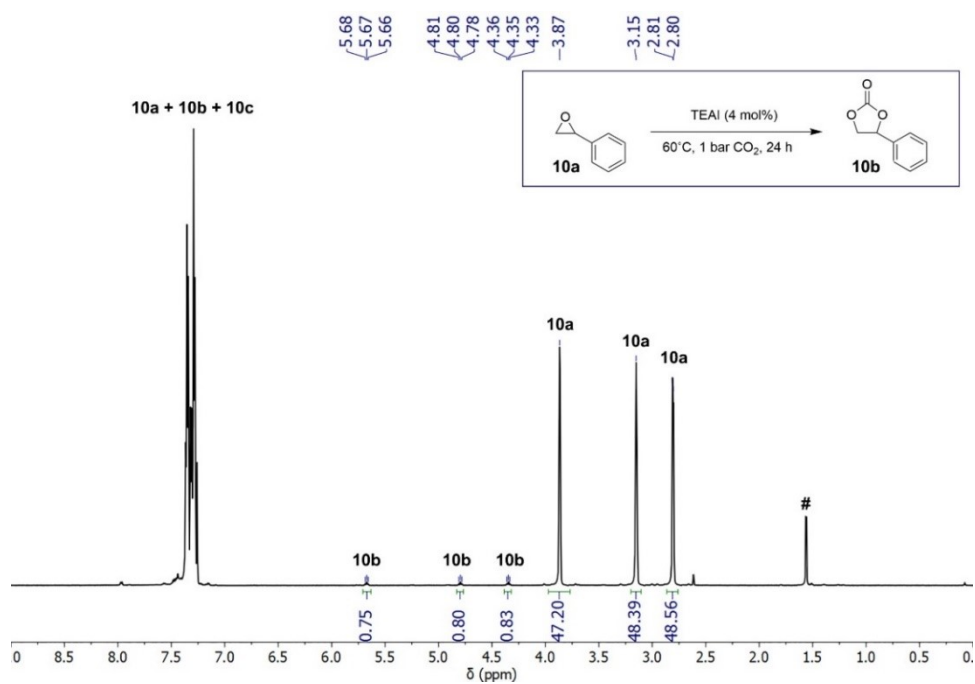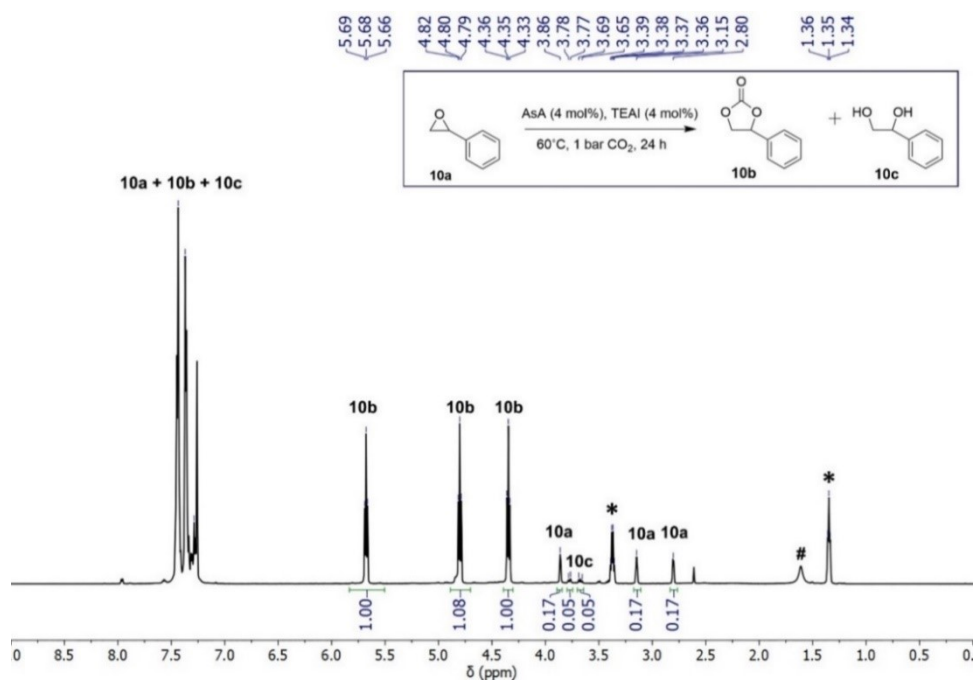

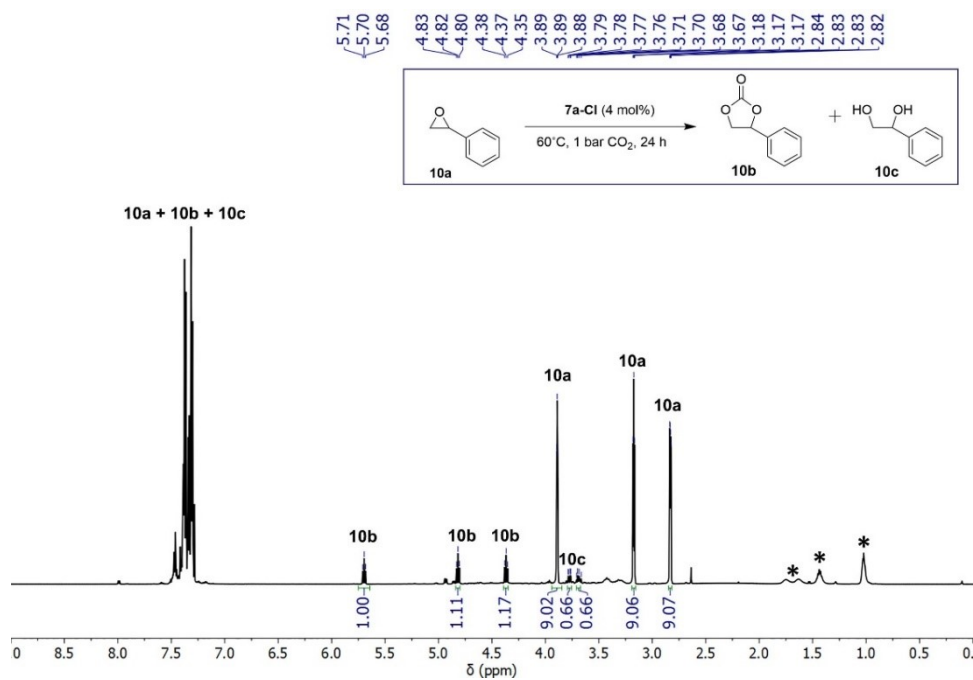

**Figure S50.** <sup>1</sup>H NMR (CDCl<sub>3</sub>) spectrum of crude CO<sub>2</sub> cycloaddition reaction to **10a**; **10a** (10 mmol), 4 mol% **7a-Cl** (\*), solvent-free, 60 °C, 1 bar CO<sub>2</sub> (balloon), 24 h; Table 1, Entry 6.

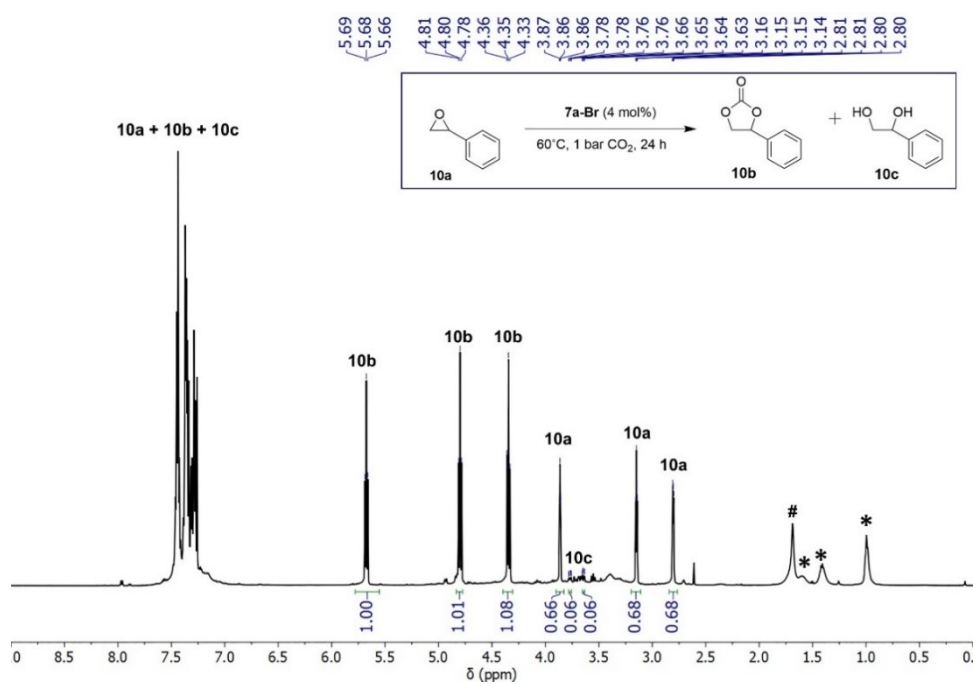

**Figure S51.** <sup>1</sup>H NMR (CDCl<sub>3</sub>) spectrum of crude CO<sub>2</sub> cycloaddition reaction to **10a**; **10a** (10 mmol), 4 mol% **7a-Br** (\*), solvent-free, 60 °C, 1 bar CO<sub>2</sub> (balloon), 24 h; Table 1, Entry 7. (#) residual water signal in CDCl<sub>3</sub>.

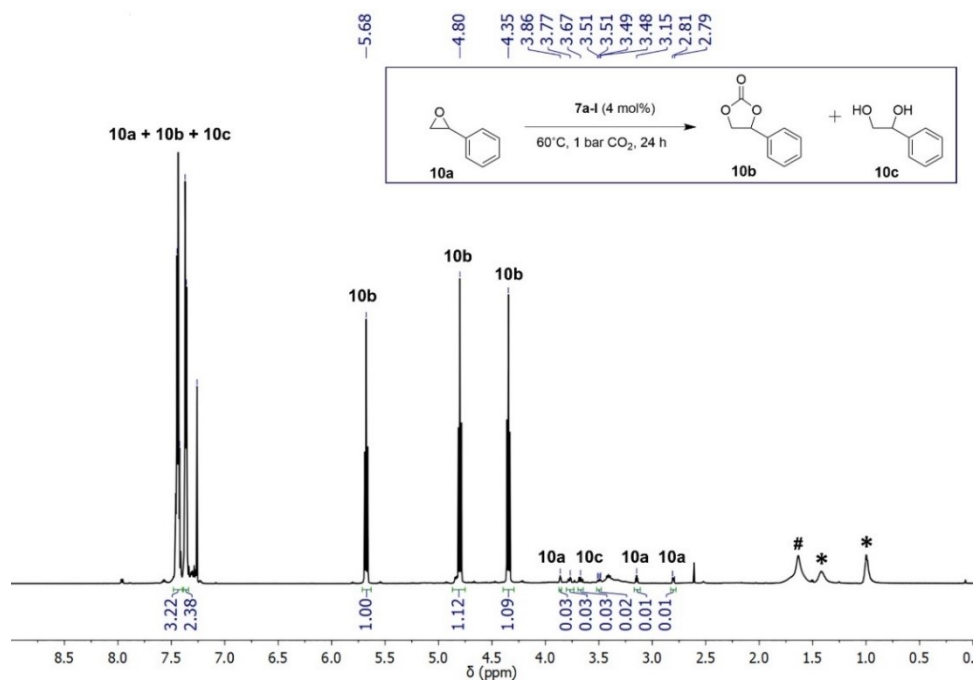

**Figure S52.**  $^1\text{H}$  NMR ( $\text{CDCl}_3$ ) spectrum of crude  $\text{CO}_2$  cycloaddition reaction to **10a**; **10a** (10 mmol), 4 mol% **7a-I** (\*), solvent-free, 60 °C, 1 bar  $\text{CO}_2$  (balloon), 24 h; Table 1, Entry 8. (#) residual water signal in  $\text{CDCl}_3$ .

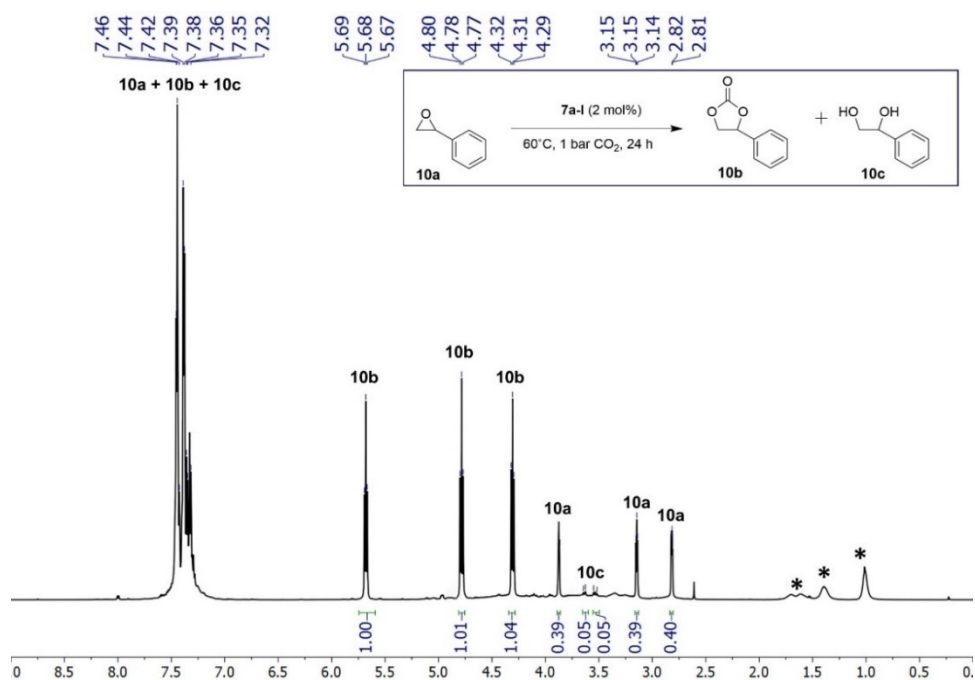

**Figure S53.**  $^1\text{H}$  NMR ( $\text{CDCl}_3$ ) spectrum of crude  $\text{CO}_2$  cycloaddition reaction to **10a**; **10a** (10 mmol), 2 mol% **7a-I** (\*), solvent-free, 60 °C, 1 bar  $\text{CO}_2$  (balloon), 24 h; Table 1, Entry 9. (#) residual water signal in  $\text{CDCl}_3$ .

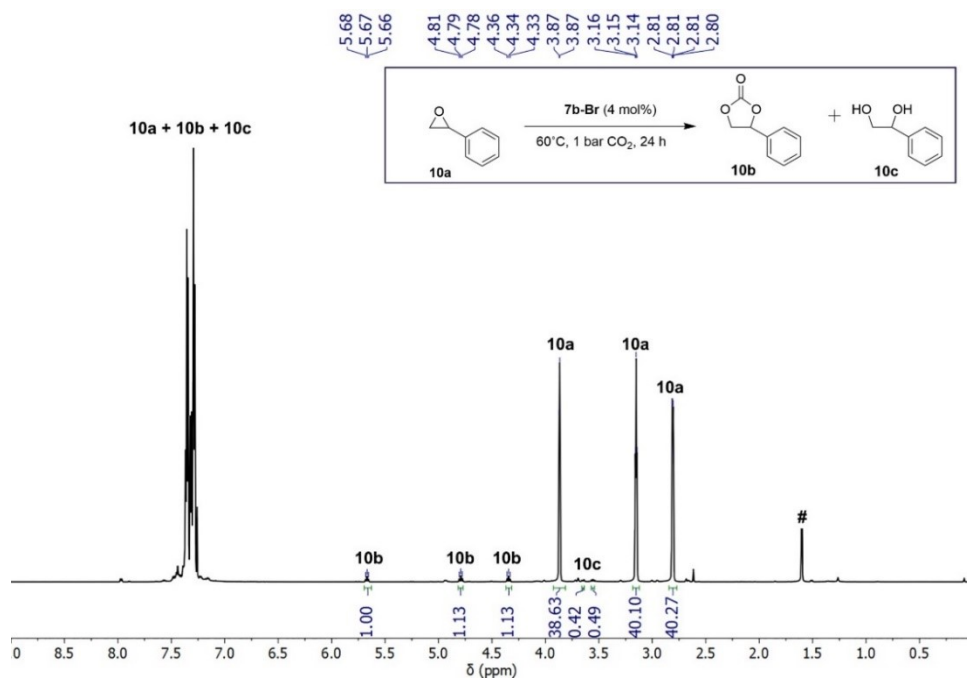

**Figure S54.** <sup>1</sup>H NMR (CDCl<sub>3</sub>) spectrum of crude CO<sub>2</sub> cycloaddition reaction to **10a**; **10a** (10 mmol), 4 mol% **7b-Br**, solvent-free, 60 °C, 1 bar CO<sub>2</sub> (balloon), 24 h; Table 1, Entry 11. (#) residual water signal in CDCl<sub>3</sub>.

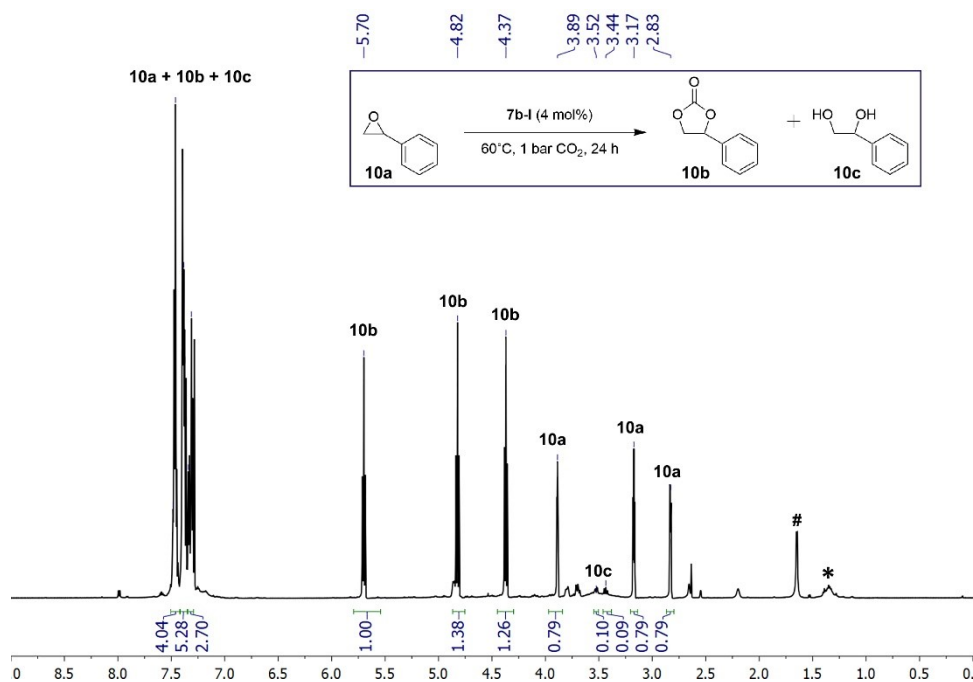

**Figure S55.** <sup>1</sup>H NMR (CDCl<sub>3</sub>) spectrum of crude CO<sub>2</sub> cycloaddition reaction to **10a**; **10a** (10 mmol), 4 mol% **7b-I** (\*), solvent-free, 60 °C, 1 bar CO<sub>2</sub> (balloon), 24 h; Table 1, Entry 12. (#) residual water signal in CDCl<sub>3</sub>.

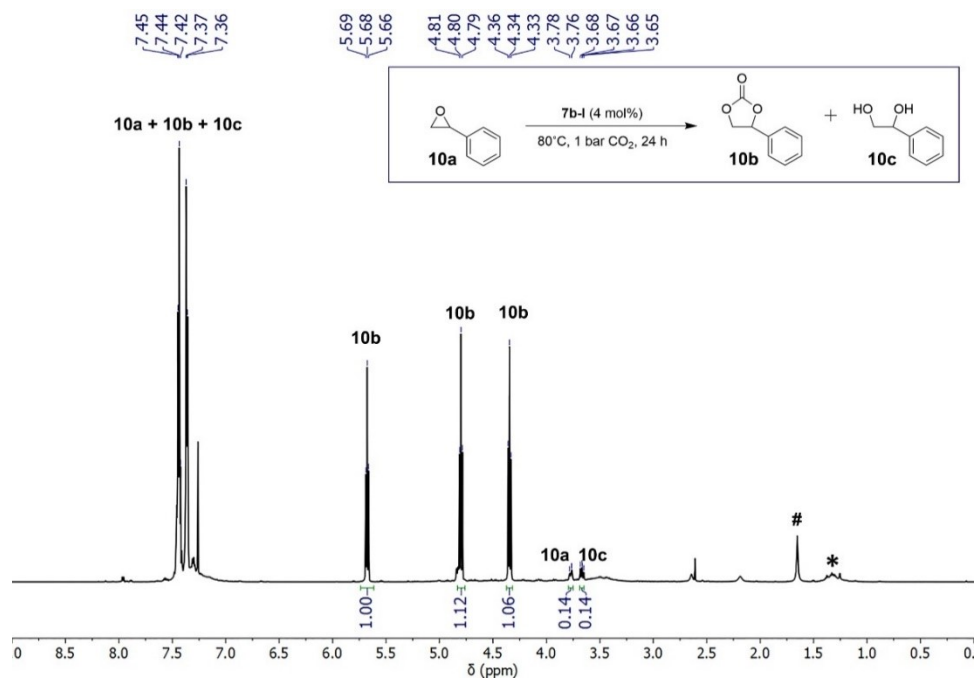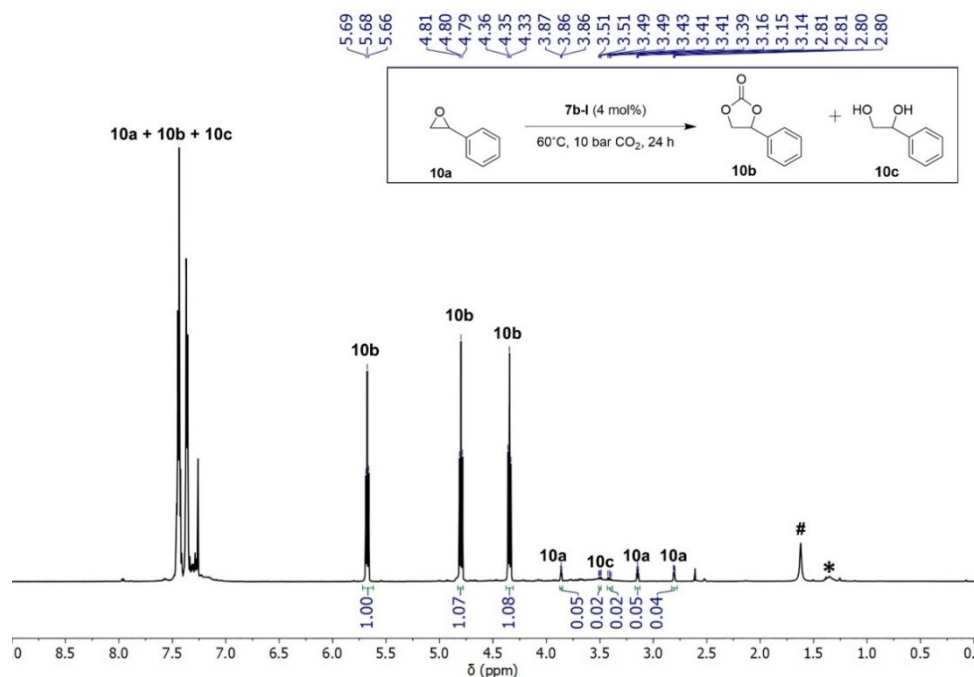

**Figure S57.** <sup>1</sup>H NMR (CDCl<sub>3</sub>) spectrum of crude CO<sub>2</sub> cycloaddition reaction to **10a**; **10a** (10 mmol), 4 mol% **7b-I** (\*), solvent-free, 60 °C, 10 bar CO<sub>2</sub>, 24 h; Table 1, Entry 14. (#) residual water signal in CDCl<sub>3</sub>.



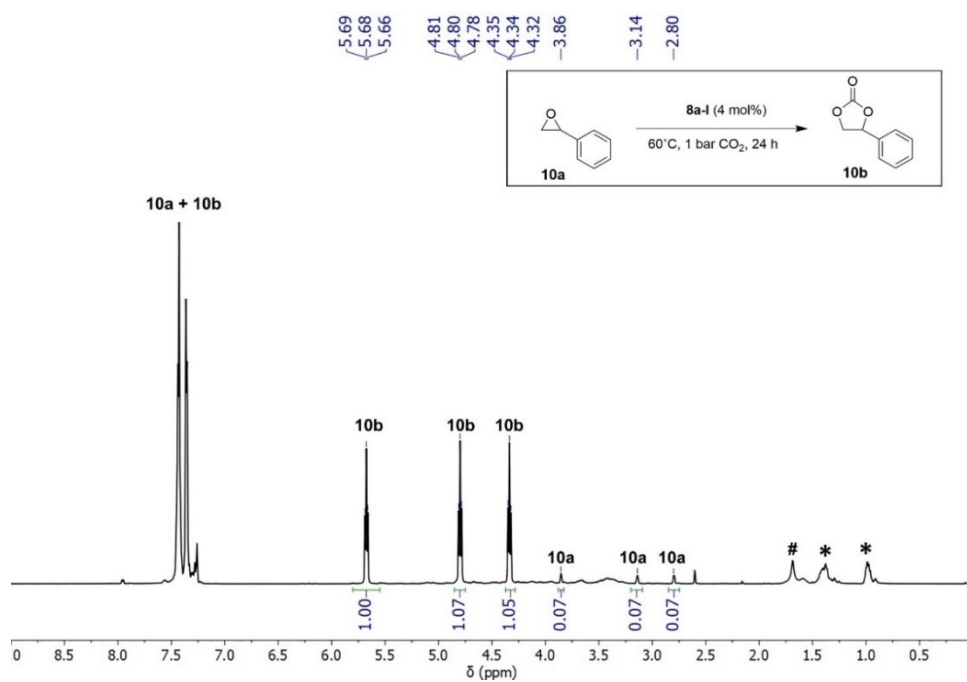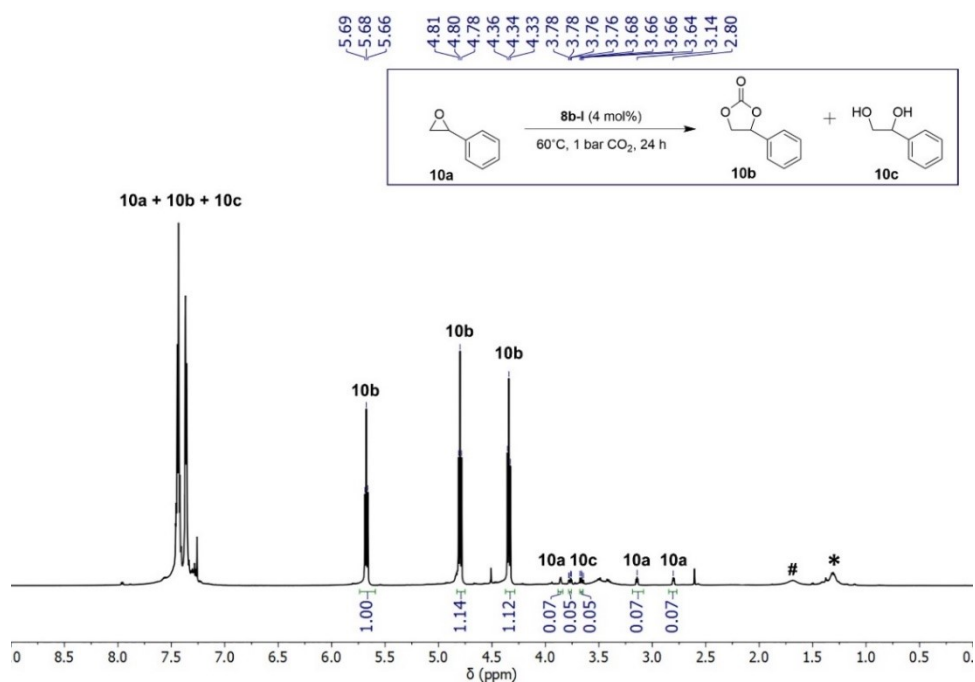

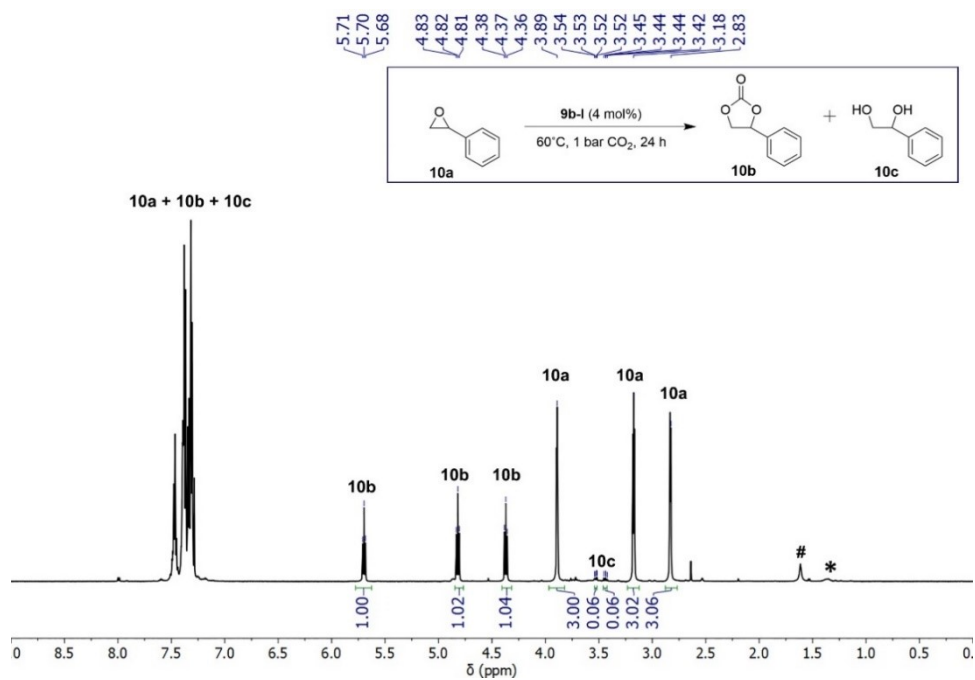

**Figure S60.** <sup>1</sup>H NMR (CDCl<sub>3</sub>) spectrum of crude CO<sub>2</sub> cycloaddition reaction to **10a**; **10a** (10 mmol), 4 mol% **9b-I** (\*), solvent-free, 60 °C, 1 bar CO<sub>2</sub> (balloon), 24 h; Table 1, Entry 17. (#) residual water signal in CDCl<sub>3</sub>.

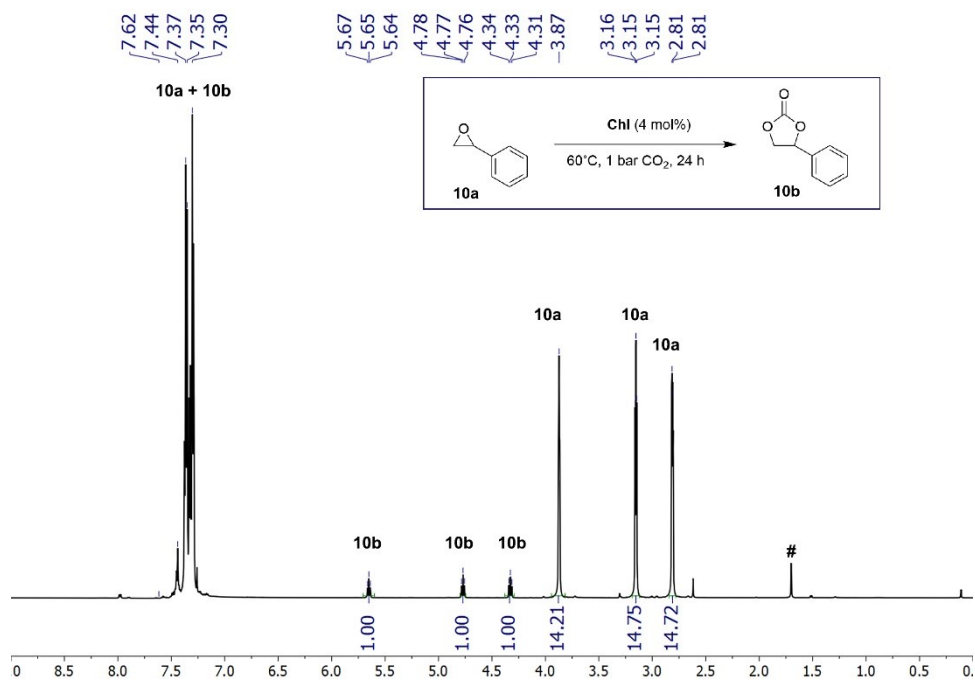

**Figure S61.** <sup>1</sup>H NMR (CDCl<sub>3</sub>) spectrum of crude CO<sub>2</sub> cycloaddition reaction to **10a**; **10a** (10 mmol), 4 mol% **ChI**, solvent-free, 60 °C, 1 bar CO<sub>2</sub> (balloon), 24 h; Table 1, Entry 18. (#) residual water signal in CDCl<sub>3</sub>.

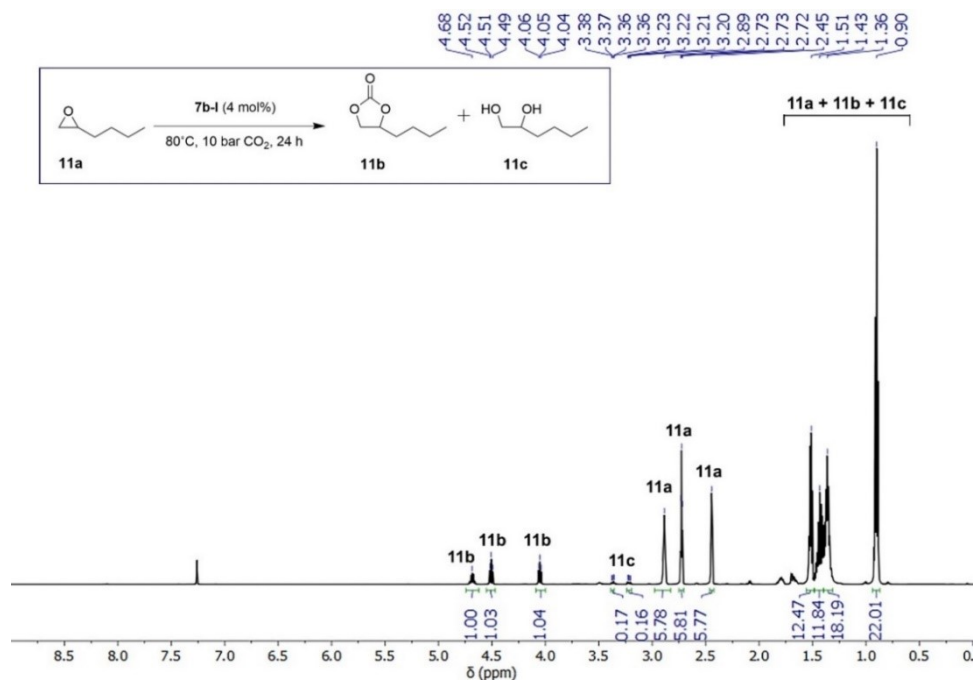

**Figure S62.** <sup>1</sup>H NMR (CDCl<sub>3</sub>) spectrum of crude CO<sub>2</sub> cycloaddition reaction to **11a**; **11a** (10 mmol), 4 mol% **7b-I**, solvent-free, 80 °C, 10 bar CO<sub>2</sub>, 24 h; Table 2, Entry 1.

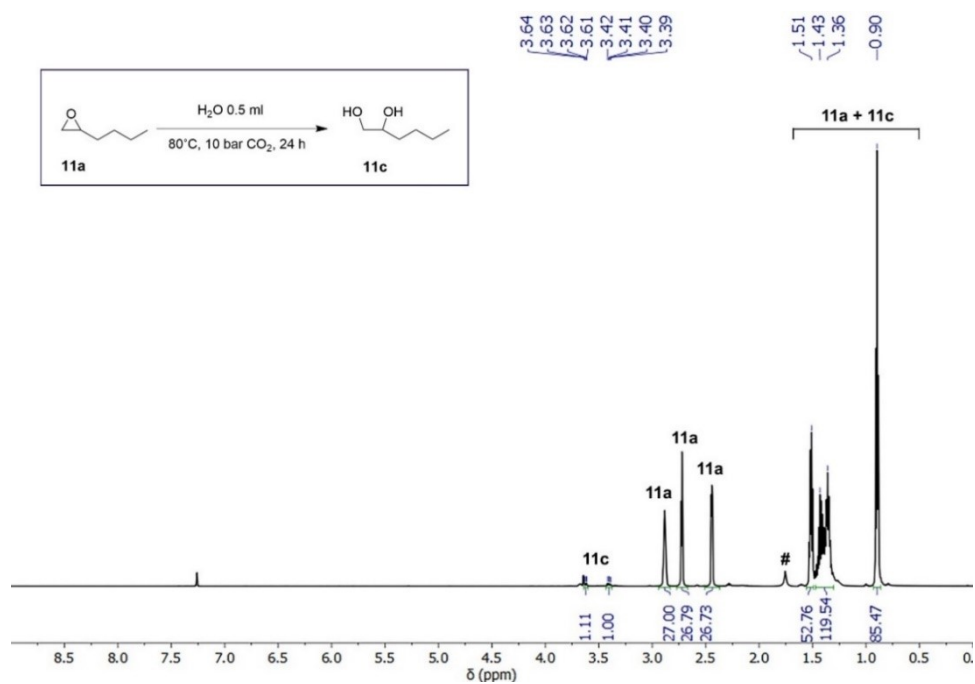

**Figure S63.** <sup>1</sup>H NMR (CDCl<sub>3</sub>) spectrum of crude CO<sub>2</sub> cycloaddition reaction to **11a**; **11a** (10 mmol), 0.5 mL H<sub>2</sub>O, 80 °C, 10 bar CO<sub>2</sub>, 24 h; Table 2, Entry 2. (#) residual water signal in CDCl<sub>3</sub>.

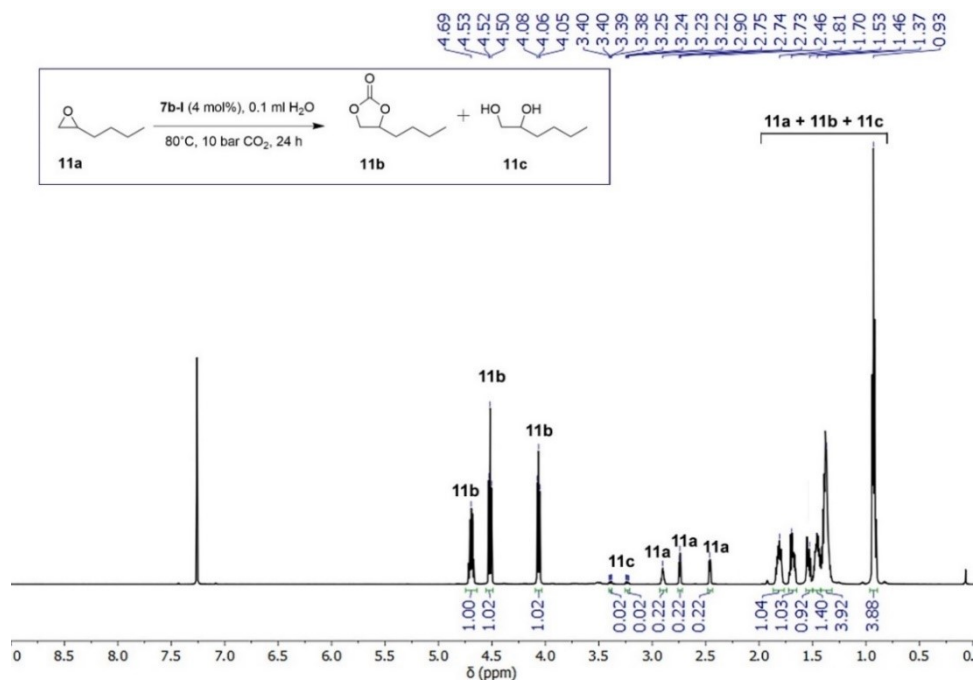

**Figure S64.** <sup>1</sup>H NMR (CDCl<sub>3</sub>) spectrum of crude CO<sub>2</sub> cycloaddition reaction to **11a**; **11a** (10 mmol), 4 mol% **7b-I**, 0.1 mL H<sub>2</sub>O, 80 °C, 10 bar CO<sub>2</sub>, 24 h (1<sup>st</sup> run); Table 2, Entry 3.

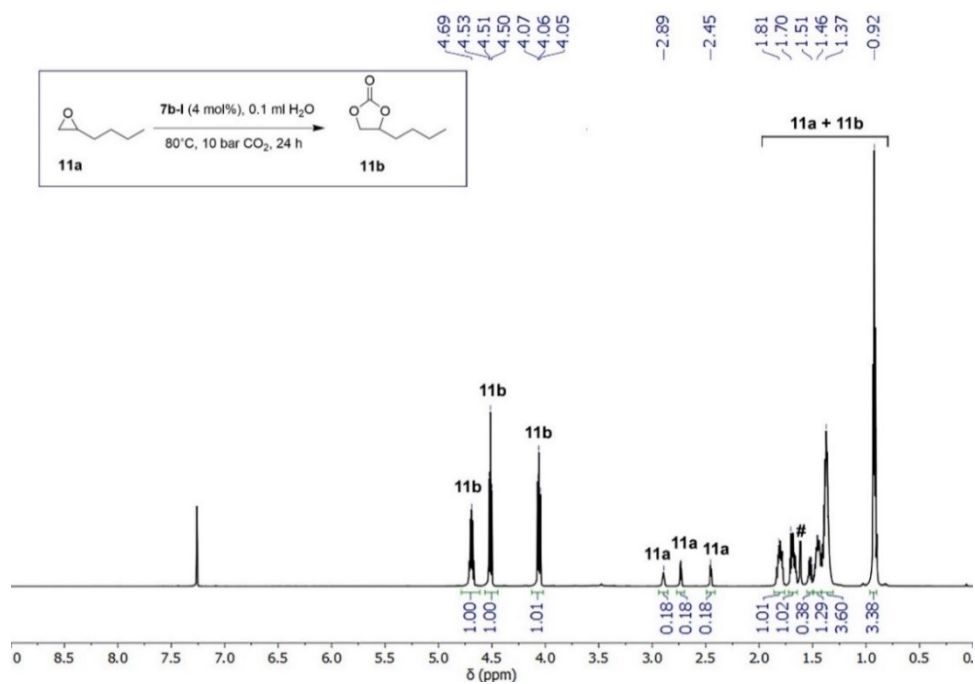

**Figure S65.** <sup>1</sup>H NMR (CDCl<sub>3</sub>) spectrum of crude CO<sub>2</sub> cycloaddition reaction to **11a**; **11a** (10 mmol), 4 mol% **7b-I**, 0.1 mL H<sub>2</sub>O, 80 °C, 10 bar CO<sub>2</sub>, 24 h (2<sup>nd</sup> run); Table 2, Entry 4. (#) residual water signal in CDCl<sub>3</sub>.

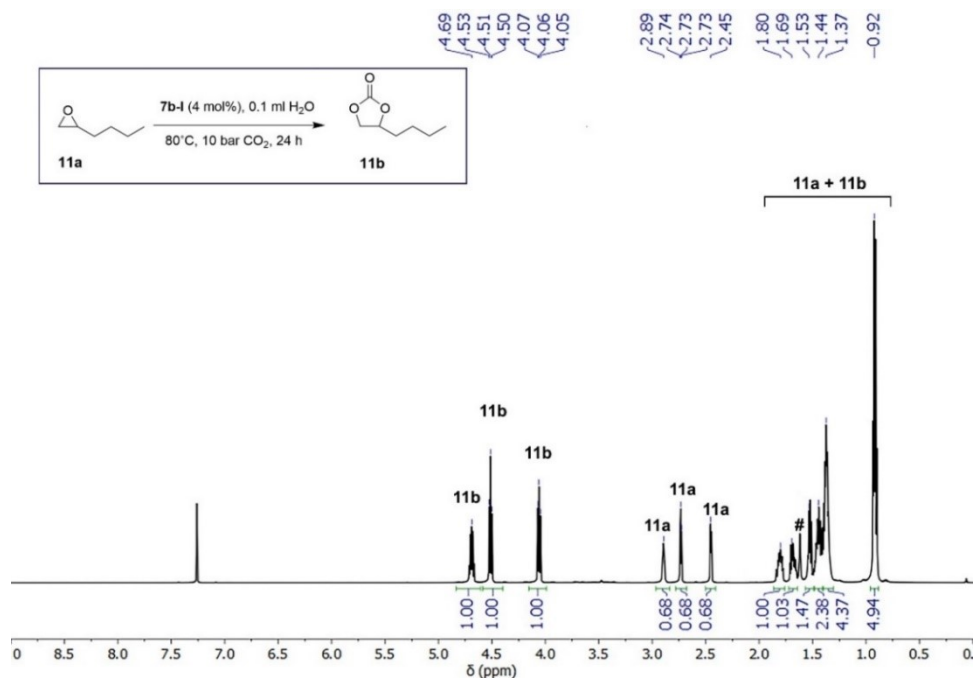

**Figure S66.**  $^1\text{H}$  NMR ( $\text{CDCl}_3$ ) spectrum of crude  $\text{CO}_2$  cycloaddition reaction to **11a**; **11a** (10 mmol), 4 mol% **7b-I**, 0.1 mL  $\text{H}_2\text{O}$ , 80 °C, 10 bar  $\text{CO}_2$ , 24 h (3<sup>rd</sup> run); Table 2, Entry 5. (#) residual water signal in  $\text{CDCl}_3$ .

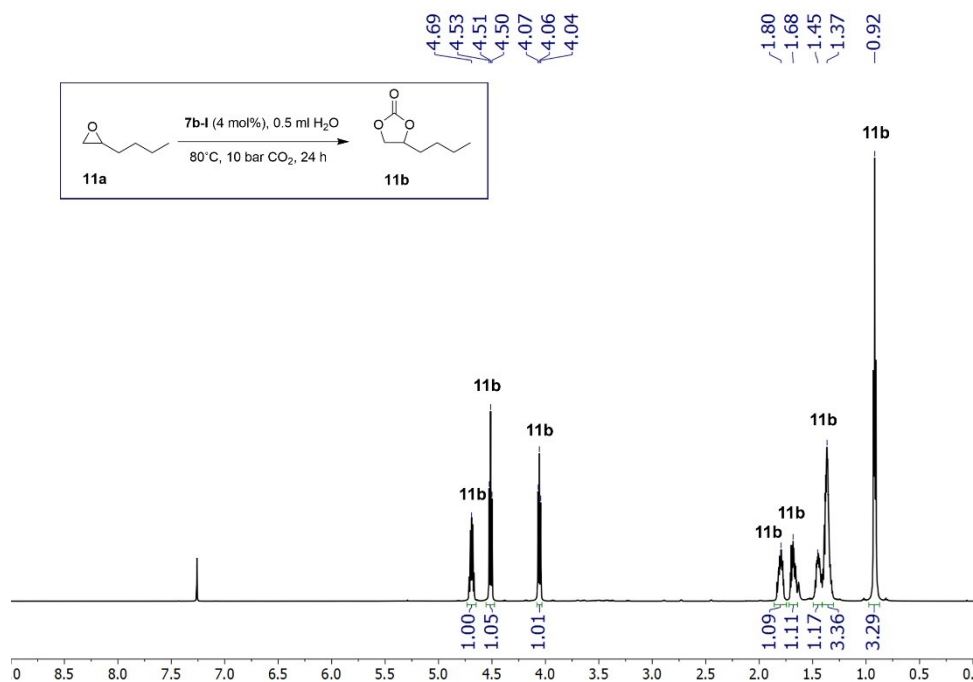

**Figure S67.**  $^1\text{H}$  NMR ( $\text{CDCl}_3$ ) spectrum of crude  $\text{CO}_2$  cycloaddition reaction to **11a**; **11a** (10 mmol), 4 mol% **7b-I**, 0.5 mL  $\text{H}_2\text{O}$ , 80 °C, 10 bar  $\text{CO}_2$ , 24 h (1<sup>st</sup> run); Table 2, Entry 6. The NMR spectrum matches the literature reference *J. Org. Chem.* 2005, 70, 1, 381–383.

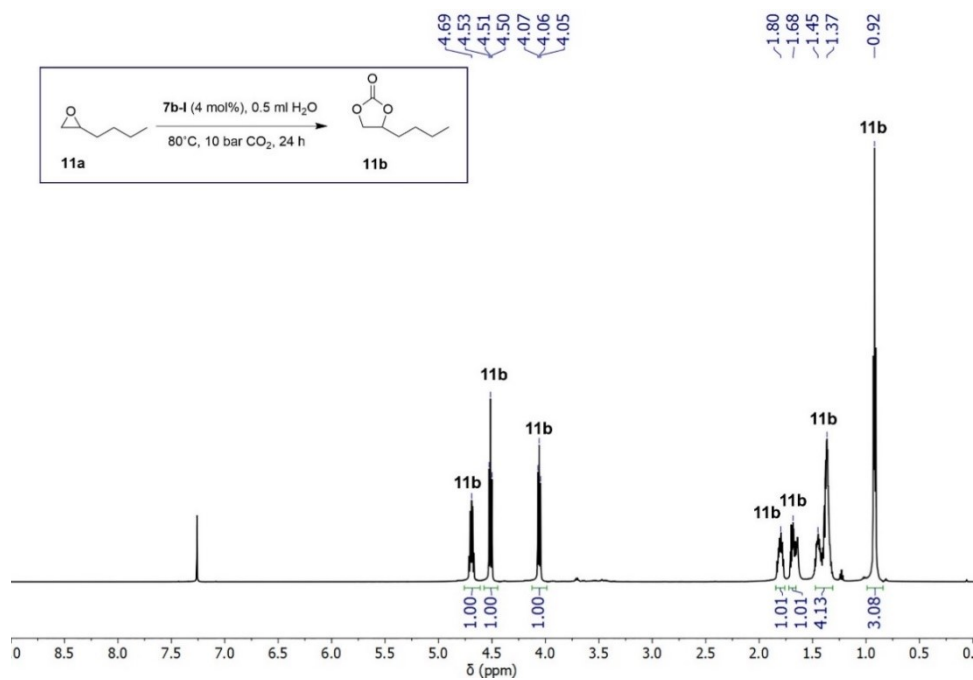

**Figure S68.**  $^1\text{H}$  NMR ( $\text{CDCl}_3$ ) spectrum of crude  $\text{CO}_2$  cycloaddition reaction to **11a**; **11a** (10 mmol), 4 mol% **7b-I**, 0.5 mL  $\text{H}_2\text{O}$ , 80 °C, 10 bar  $\text{CO}_2$ , 24 h (2<sup>nd</sup> run). The NMR spectrum matches the literature reference *J. Org. Chem.* 2005, 70, 1, 381–383.

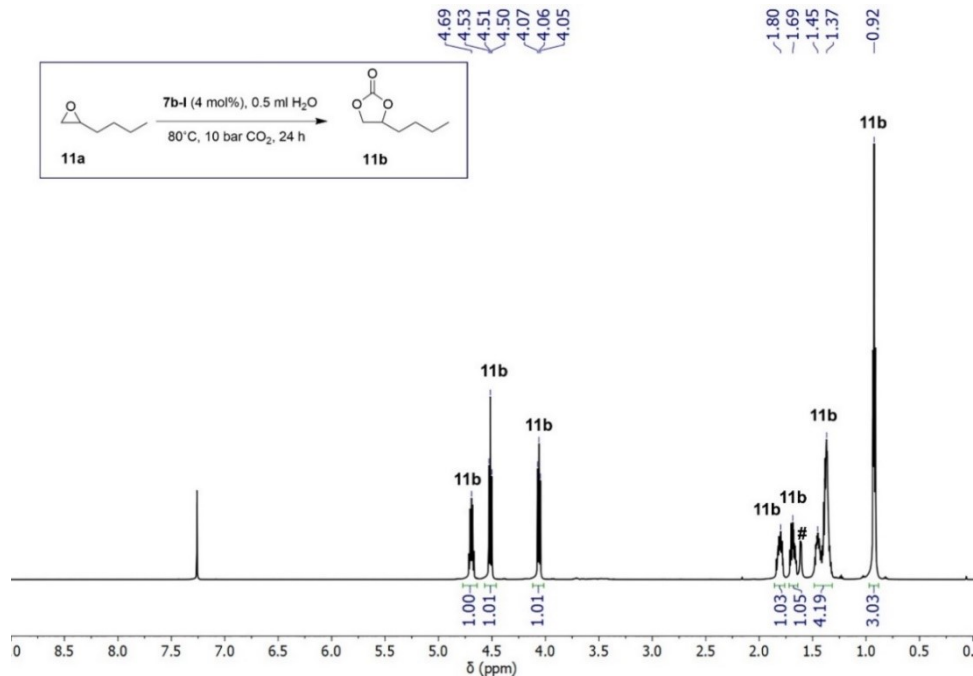

**Figure S69.**  $^1\text{H}$  NMR ( $\text{CDCl}_3$ ) spectrum of crude  $\text{CO}_2$  cycloaddition reaction to **11a**; **11a** (10 mmol), 4 mol% **7b-I**, 0.5 mL  $\text{H}_2\text{O}$ , 80 °C, 10 bar  $\text{CO}_2$ , 24 h (3<sup>rd</sup> run). (#) residual water signal in  $\text{CDCl}_3$ . The NMR spectrum matches the literature reference *J. Org. Chem.* 2005, 70, 1, 381–383.

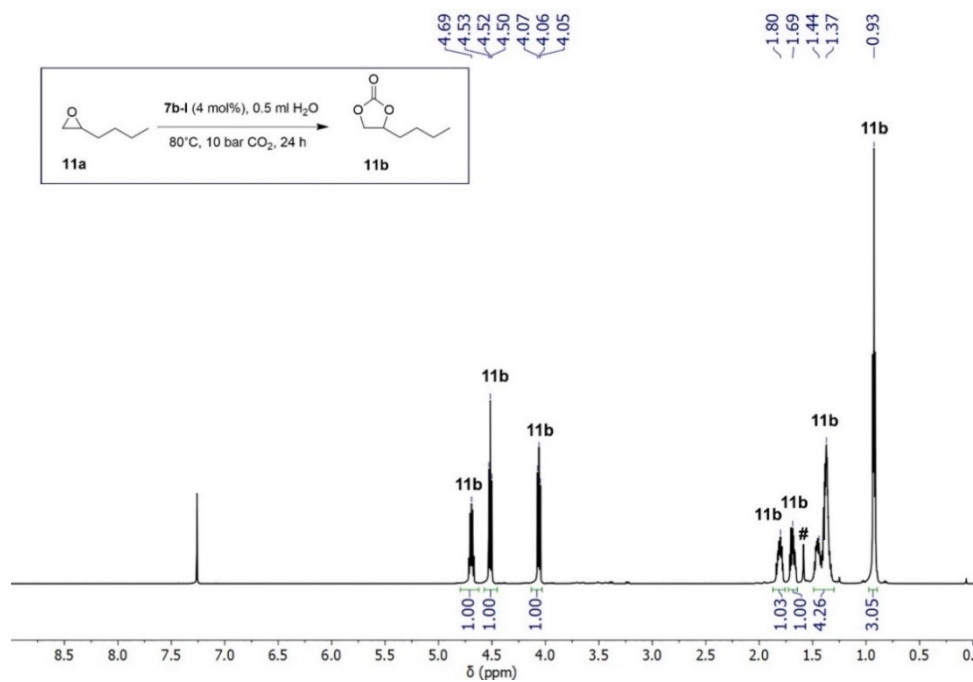

**Figure S70.**  $^1\text{H}$  NMR ( $\text{CDCl}_3$ ) spectrum of crude  $\text{CO}_2$  cycloaddition reaction to **11a**; **11a** (10 mmol), 4 mol% **7b-I**, 0.5 mL  $\text{H}_2\text{O}$ , 80 °C, 10 bar  $\text{CO}_2$ , 24 h (4<sup>th</sup> run). (#) residual water signal in  $\text{CDCl}_3$ . The NMR spectrum matches the literature reference *J. Org. Chem.* 2005, 70, 1, 381–383.

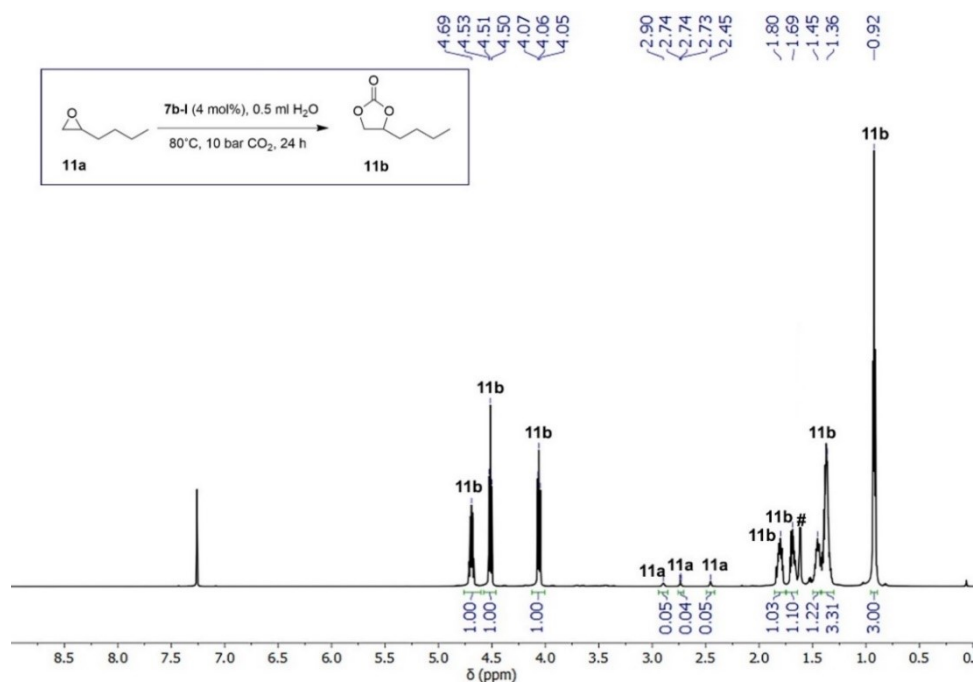

**Figure S71.**  $^1\text{H}$  NMR ( $\text{CDCl}_3$ ) spectrum of crude  $\text{CO}_2$  cycloaddition reaction to **11a**; **11a** (10 mmol), 4 mol% **7b-I**, 0.5 mL  $\text{H}_2\text{O}$ , 80 °C, 10 bar  $\text{CO}_2$ , 24 h (5<sup>th</sup> run). (#) residual water signal in  $\text{CDCl}_3$ .

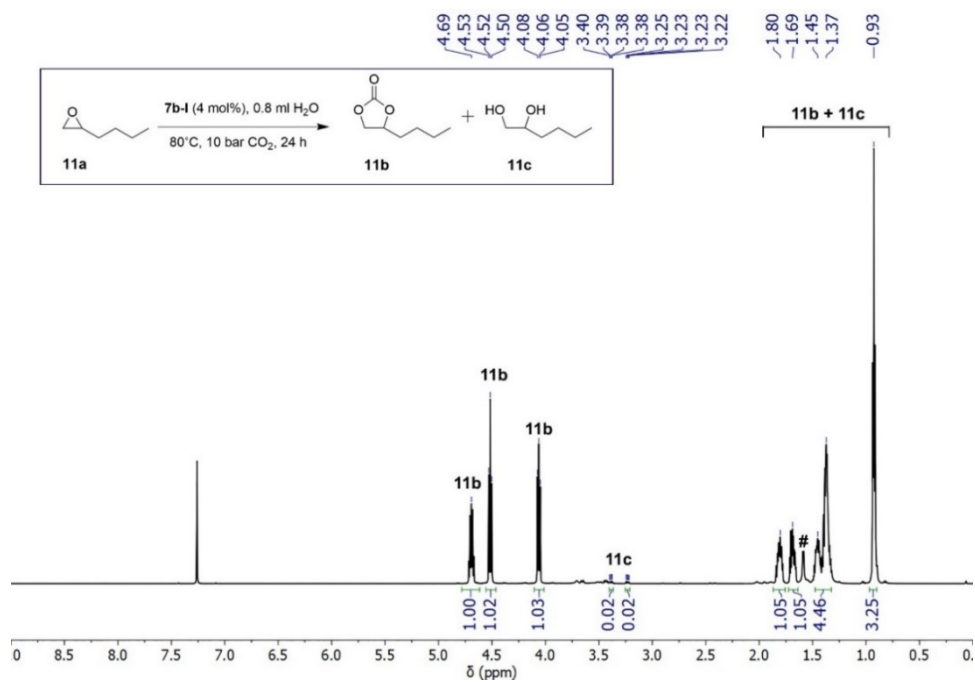

**Figure S72.** <sup>1</sup>H NMR (CDCl<sub>3</sub>) spectrum of crude CO<sub>2</sub> cycloaddition reaction to **11a**; **11a** (10 mmol), 4 mol% **7b-I**, 0.8 mL H<sub>2</sub>O, 80 °C, 10 bar CO<sub>2</sub>, 24 h; Table 2, Entry 7. (#) residual water signal in CDCl<sub>3</sub>.

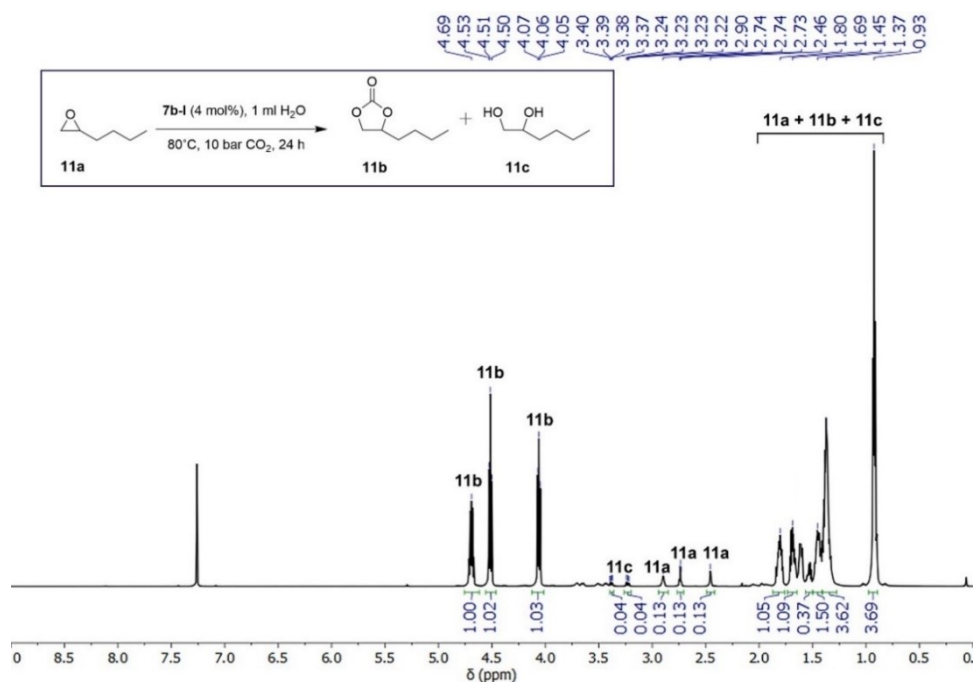

**Figure S73.** <sup>1</sup>H NMR (CDCl<sub>3</sub>) spectrum of crude CO<sub>2</sub> cycloaddition reaction to **11a**; **11a** (10 mmol), 4 mol% **7b-I**, 1 mL H<sub>2</sub>O, 80 °C, 10 bar CO<sub>2</sub>, 24 h; Table 2, Entry 8.



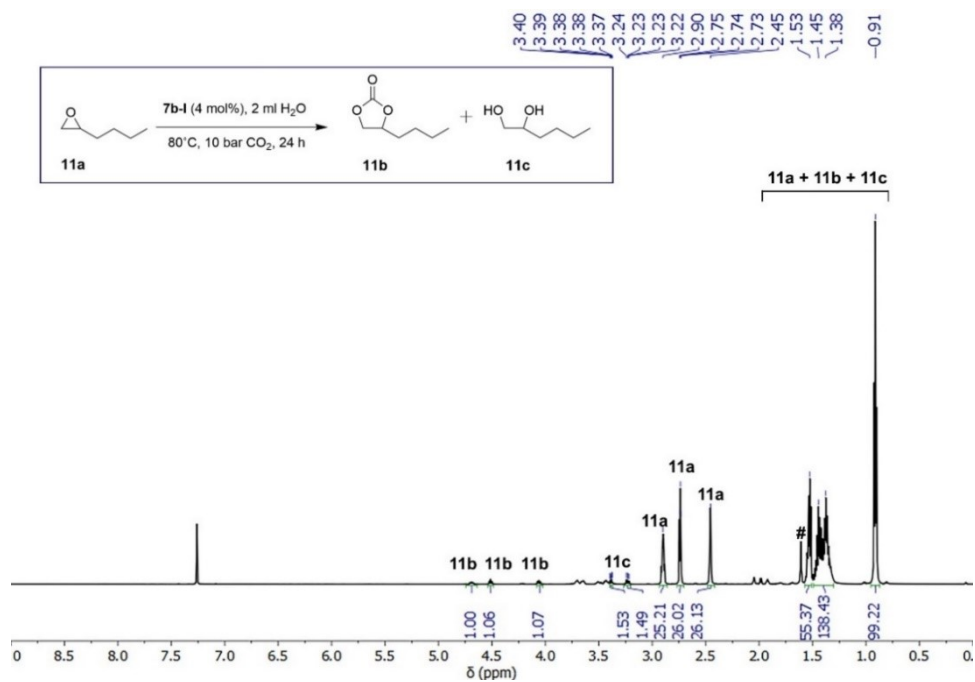

**Figure S74.** <sup>1</sup>H NMR (CDCl<sub>3</sub>) spectrum of crude CO<sub>2</sub> cycloaddition reaction to **11a**; **11a** (10 mmol), 4 mol% **7b-I**, 2 mL H<sub>2</sub>O, 80 °C, 10 bar CO<sub>2</sub>, 24 h; Table 2, Entry 9. (#) residual water signal in CDCl<sub>3</sub>.

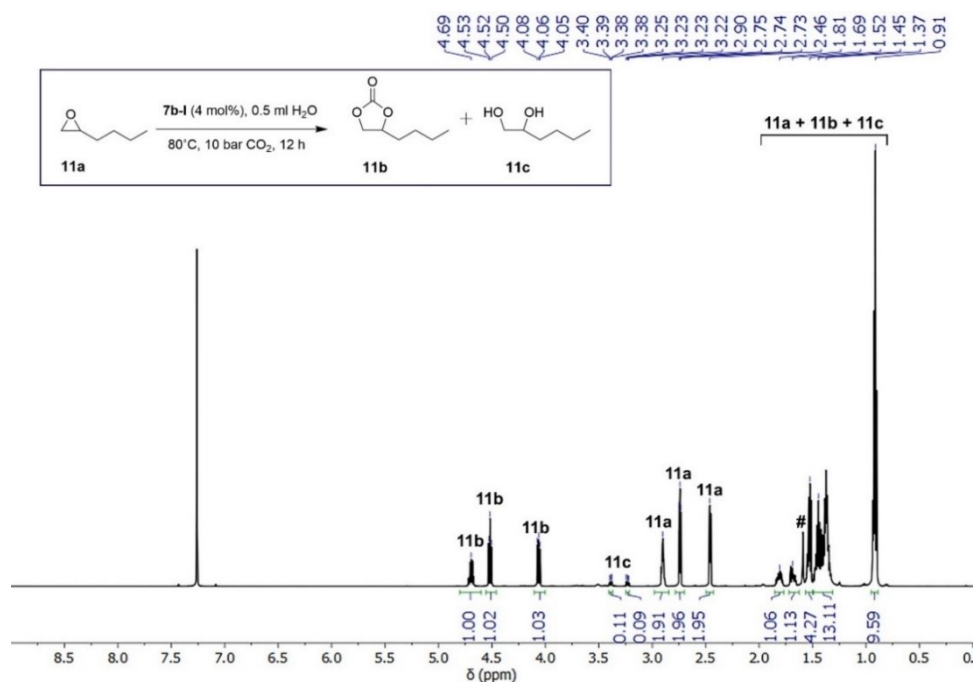

**Figure S75.** <sup>1</sup>H NMR (CDCl<sub>3</sub>) spectrum of crude CO<sub>2</sub> cycloaddition reaction to **11a**; **11a** (10 mmol), 4 mol% **7b-I**, 0.5 mL H<sub>2</sub>O, 80 °C, 10 bar CO<sub>2</sub>, 12 h; Table 2, Entry 10. (#) residual water signal in CDCl<sub>3</sub>.

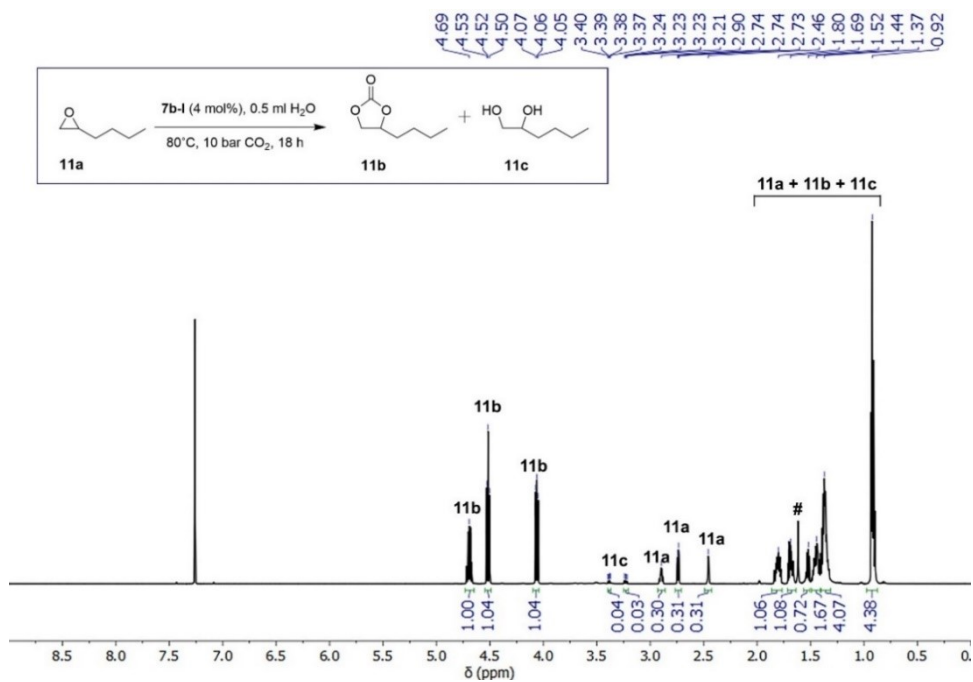

**Figure S76.** <sup>1</sup>H NMR (CDCl<sub>3</sub>) spectrum of crude CO<sub>2</sub> cycloaddition reaction to **11a**; **11a** (10 mmol), 4 mol% **7b-I**, 0.5 mL H<sub>2</sub>O, 80 °C, 10 bar CO<sub>2</sub>, 18 h; Table 2, Entry 11. (#) residual water signal in CDCl<sub>3</sub>.

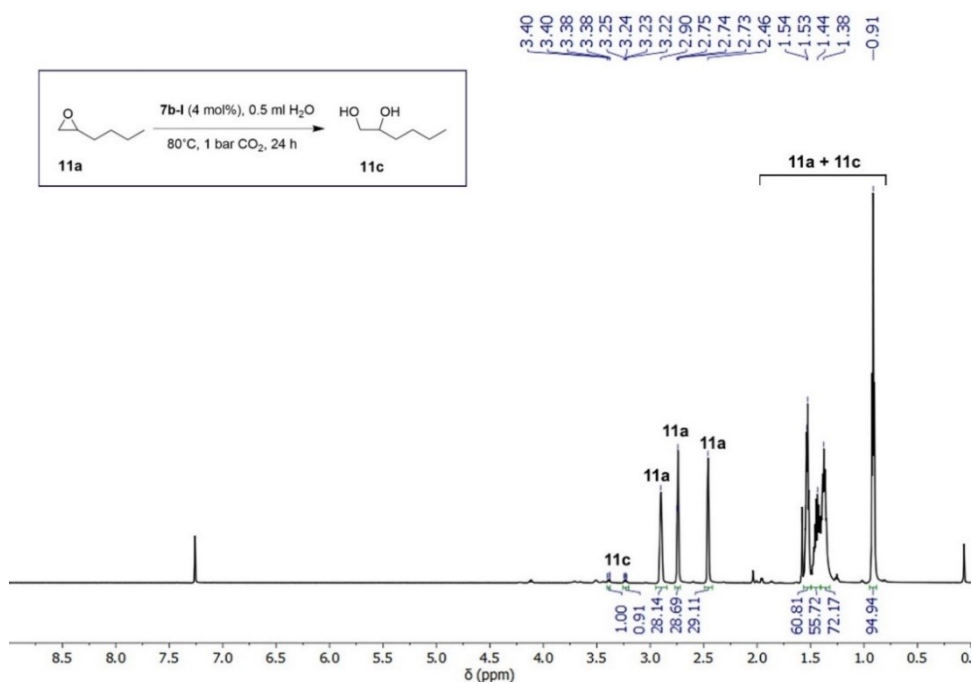

**Figure S77.** <sup>1</sup>H NMR (CDCl<sub>3</sub>) spectrum of crude CO<sub>2</sub> cycloaddition reaction to **11a**; **11a** (10 mmol), 4 mol% **7b-I**, 0.5 mL H<sub>2</sub>O, 80 °C, 1 bar CO<sub>2</sub>, 24 h; Table 2, Entry 12.

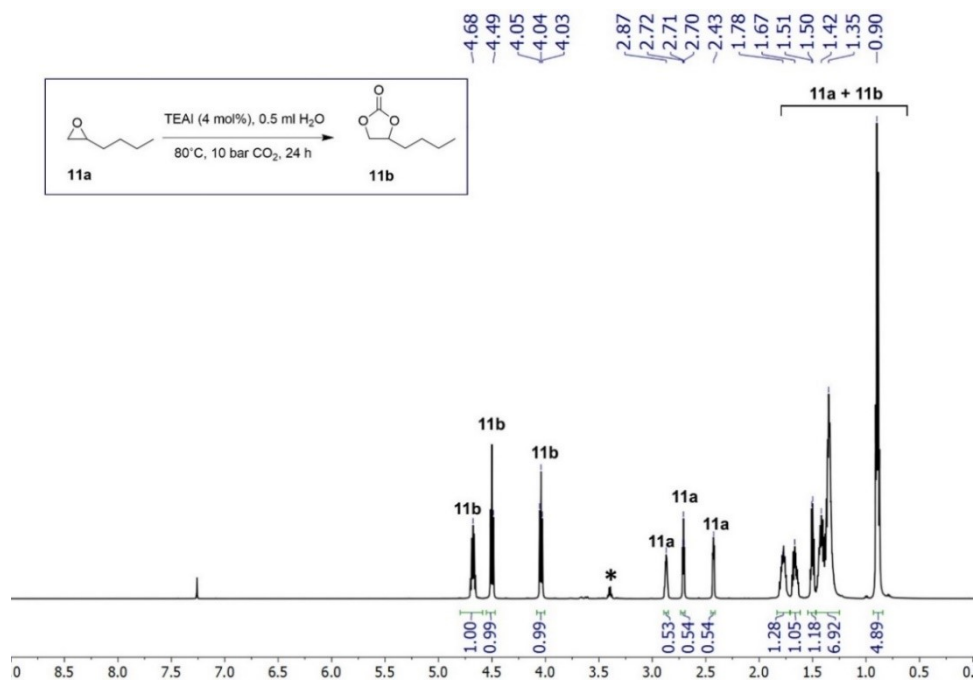

**Figure S78.** <sup>1</sup>H NMR (CDCl<sub>3</sub>) spectrum of crude CO<sub>2</sub> cycloaddition reaction to **11a**; **11a** (10 mmol), 4 mol% TEAI (\*), 0.5 mL H<sub>2</sub>O, 80 °C, 10 bar CO<sub>2</sub>, 24 h (1<sup>st</sup> run); Table 2, Entry 13.

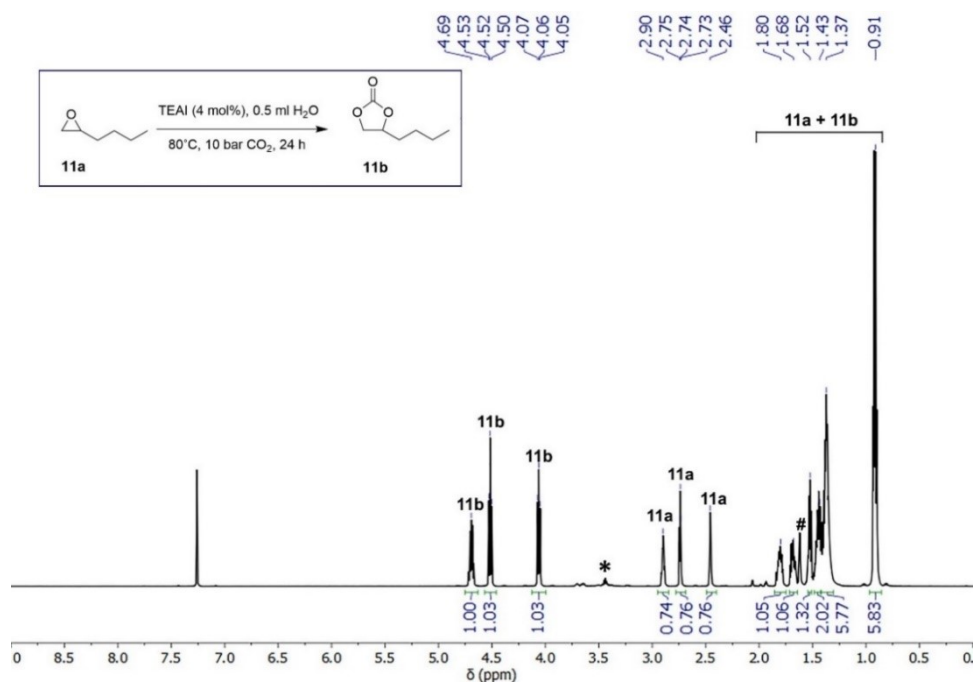

**Figure S79.** <sup>1</sup>H NMR (CDCl<sub>3</sub>) spectrum of crude CO<sub>2</sub> cycloaddition reaction to **11a**; **11a** (10 mmol), 4 mol% TEAI (\*), 0.5 mL H<sub>2</sub>O, 80 °C, 10 bar CO<sub>2</sub>, 24 h (2<sup>nd</sup> run); Table 2, Entry 14. (#) residual water signal in CDCl<sub>3</sub>.

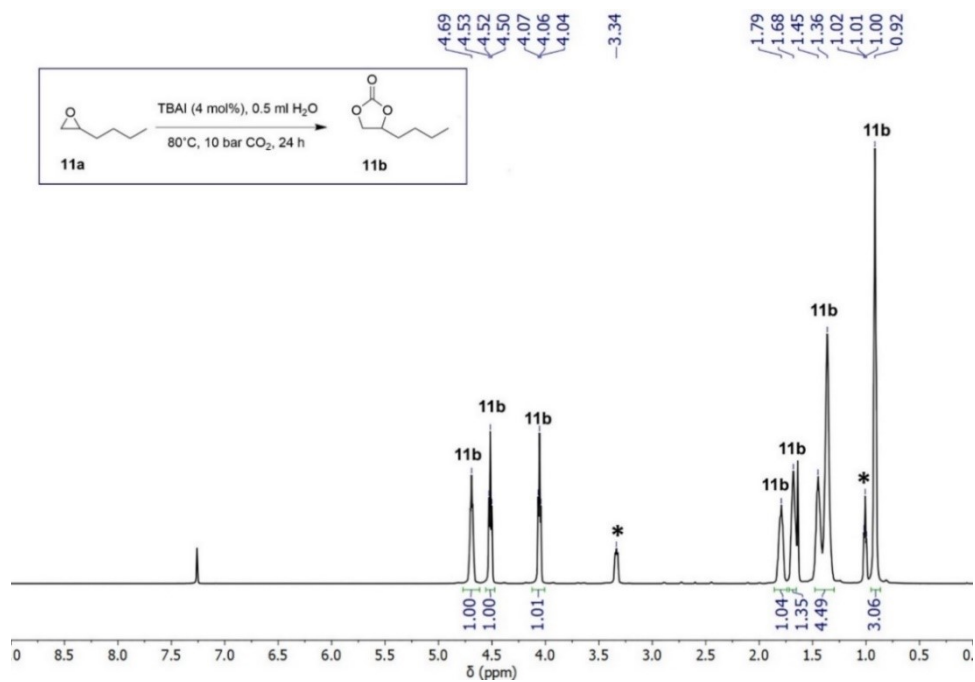

**Figure S80.**  $^1\text{H}$  NMR ( $\text{CDCl}_3$ ) spectrum of crude  $\text{CO}_2$  cycloaddition reaction to **11a**; **11a** (10 mmol), 4 mol% **TBAI** (\*), 0.5 mL  $\text{H}_2\text{O}$ , 80 °C, 10 bar  $\text{CO}_2$ , 24 h (1<sup>st</sup> run); Table 2, Entry 15.

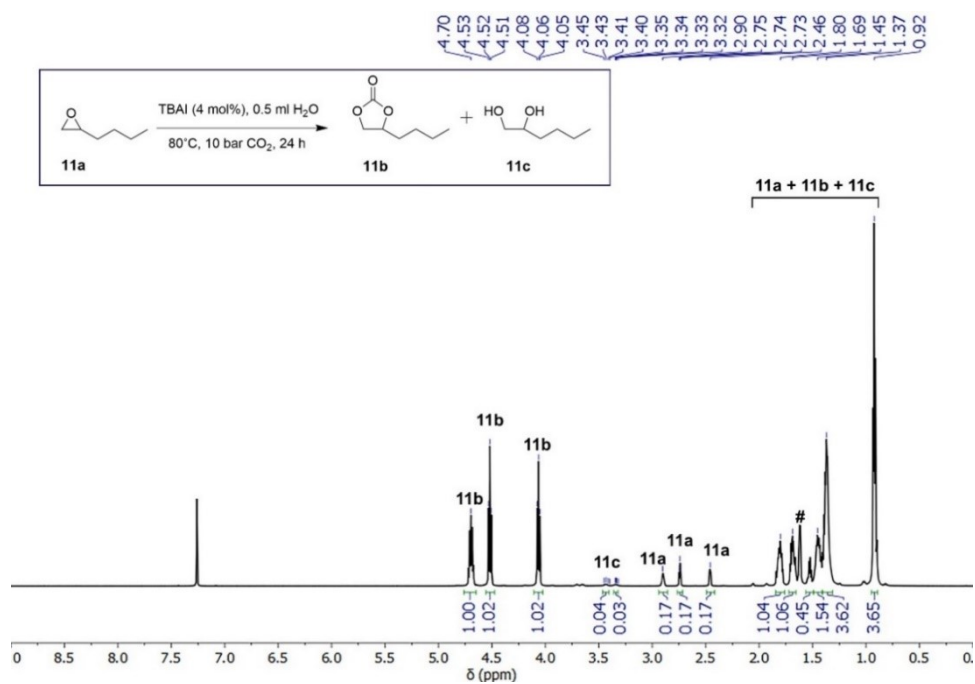

**Figure S81.**  $^1\text{H}$  NMR ( $\text{CDCl}_3$ ) spectrum of crude  $\text{CO}_2$  cycloaddition reaction to **11a**; **11a** (10 mmol), 4 mol% **TBAI**, 0.5 mL  $\text{H}_2\text{O}$ , 80 °C, 10 bar  $\text{CO}_2$ , 24 h (2<sup>nd</sup> run); Table 2, Entry 16. (#) residual water signal in  $\text{CDCl}_3$ .

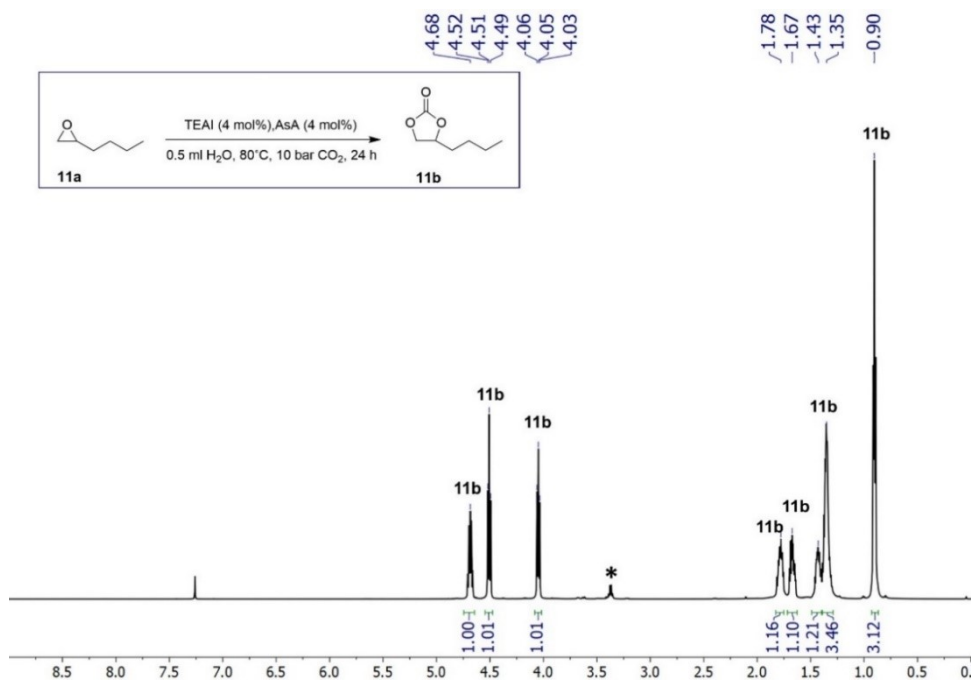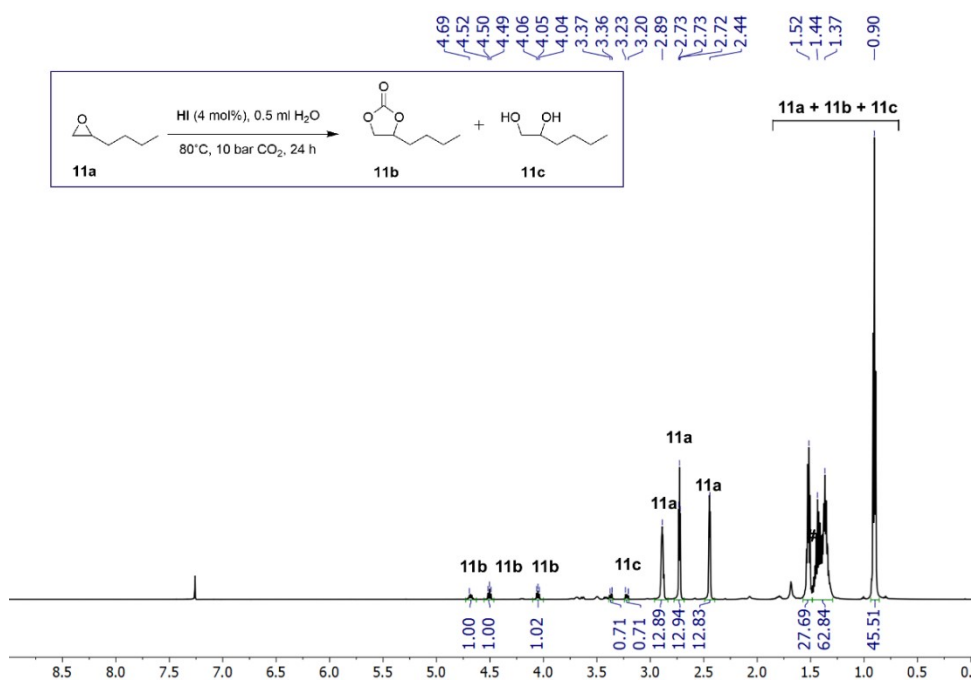

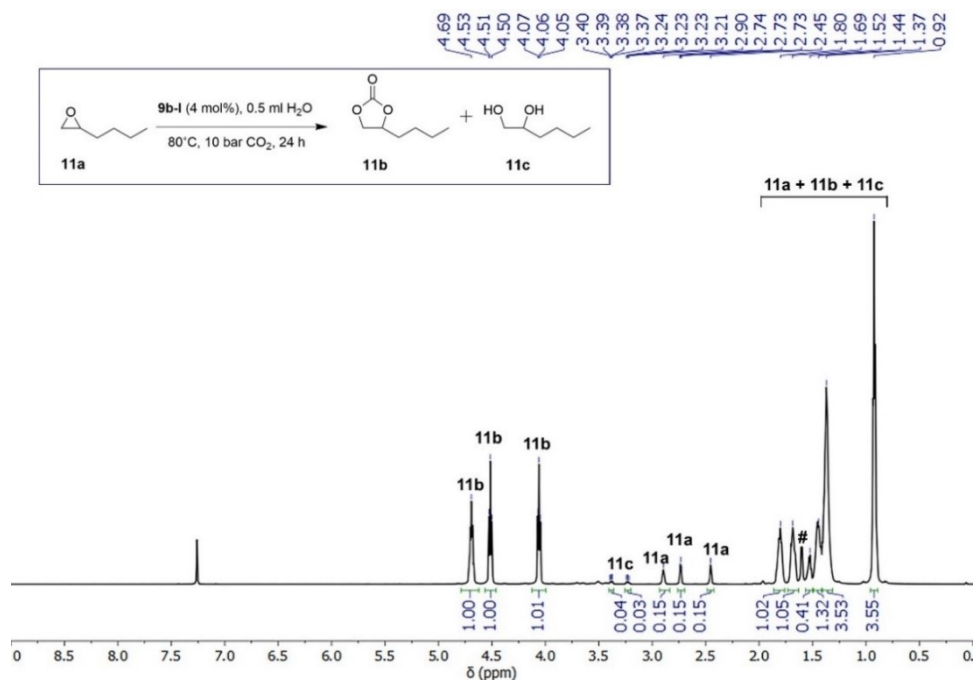

**Figure S84.**  $^1\text{H NMR}$  ( $\text{CDCl}_3$ ) spectrum of crude  $\text{CO}_2$  cycloaddition reaction to **11a**; **11a** (10 mmol), 4 mol% **9b-I**, 0.5 mL  $\text{H}_2\text{O}$ , 80 °C, 10 bar  $\text{CO}_2$ , 24 h; Table 2, Entry 20. (#) residual water signal in  $\text{CDCl}_3$ .

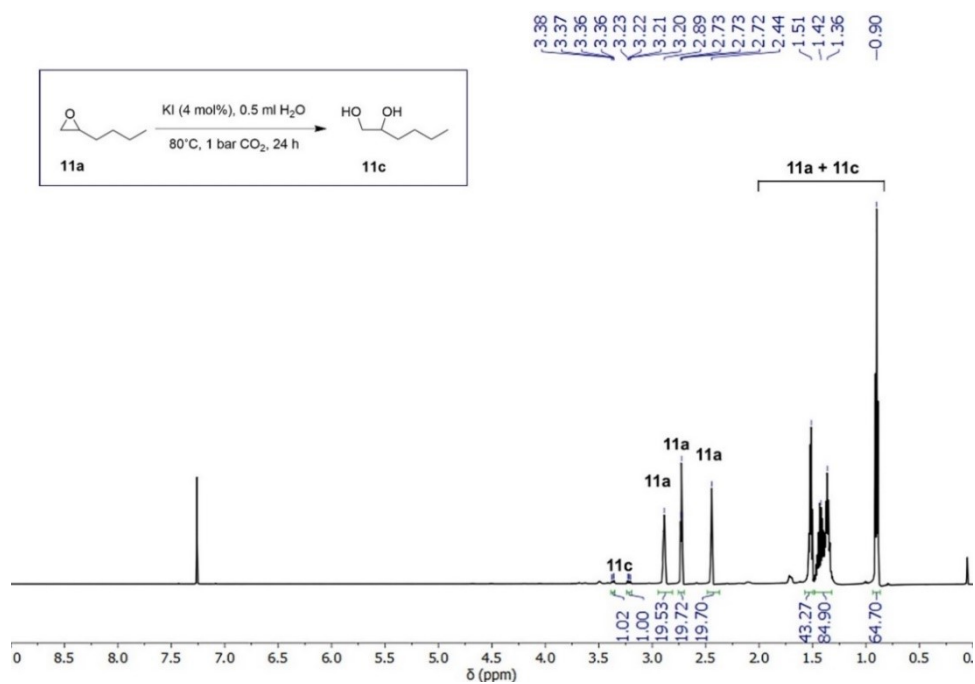

**Figure S85.**  $^1\text{H NMR}$  ( $\text{CDCl}_3$ ) spectrum of crude  $\text{CO}_2$  cycloaddition reaction to **11a**; **11a** (10 mmol), 4 mol% **KI**, 0.5 mL  $\text{H}_2\text{O}$ , 80 °C, 1 bar  $\text{CO}_2$ , 24 h; Table 3, Entry 1.

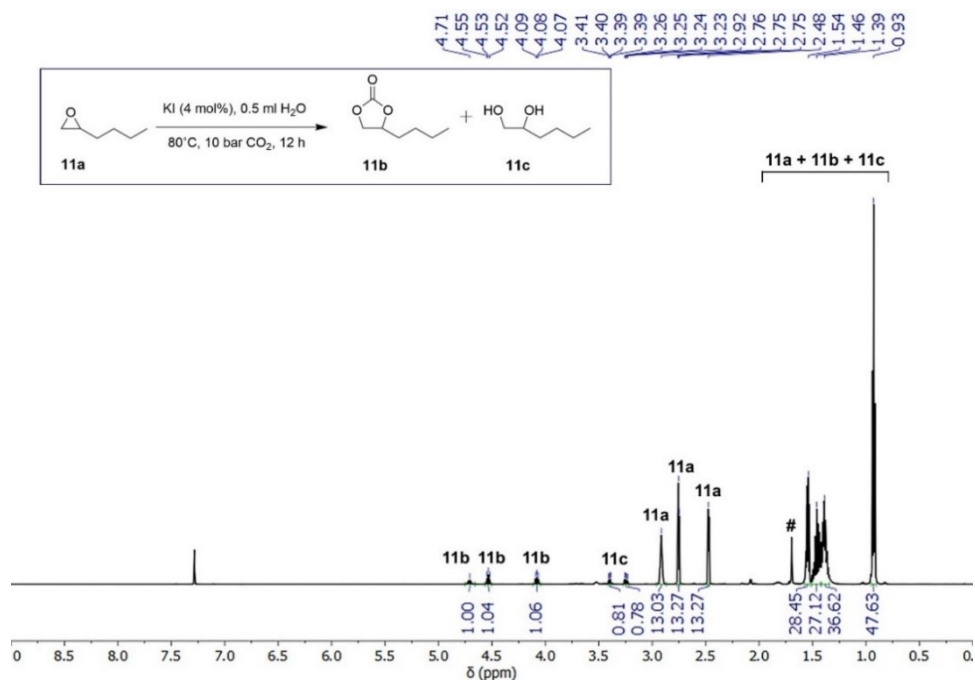

**Figure S86.**  $^1\text{H}$  NMR ( $\text{CDCl}_3$ ) spectrum of crude  $\text{CO}_2$  cycloaddition reaction to **11a**; **11a** (10 mmol), 4 mol% KI, 0.5 mL  $\text{H}_2\text{O}$ , 80 °C, 10 bar  $\text{CO}_2$ , 12 h; Table 3, Entry 2. (#) residual water signal in  $\text{CDCl}_3$ .

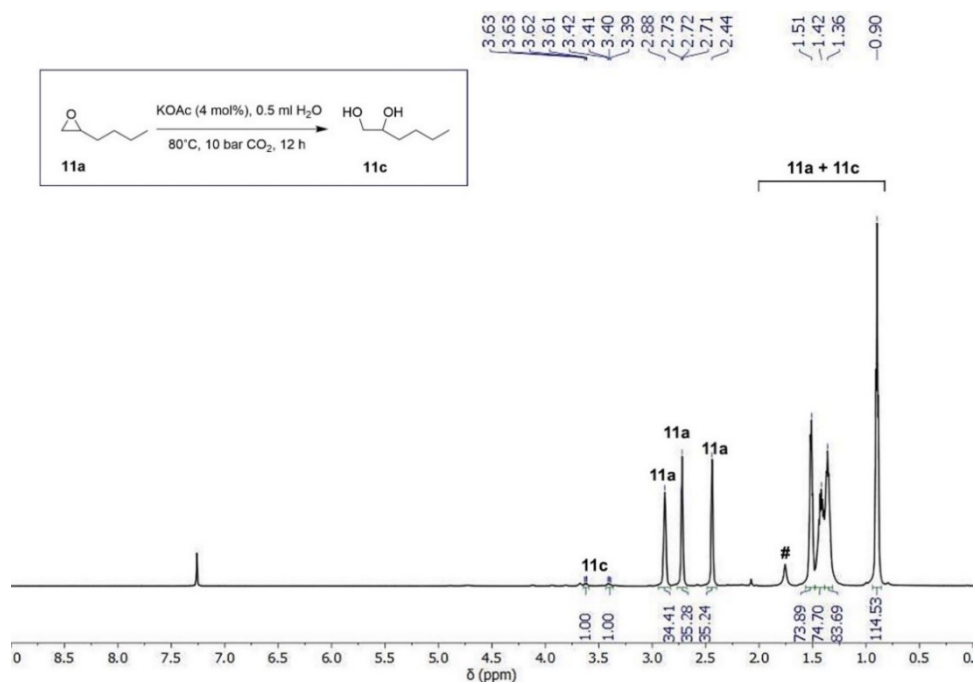

**Figure S87.**  $^1\text{H}$  NMR ( $\text{CDCl}_3$ ) spectrum of crude  $\text{CO}_2$  cycloaddition reaction to **11a**; **11a** (10 mmol), 4 mol% KOAc (\*), 0.5 mL  $\text{H}_2\text{O}$ , 80 °C, 10 bar  $\text{CO}_2$ , 12 h; Table 3, Entry 3.

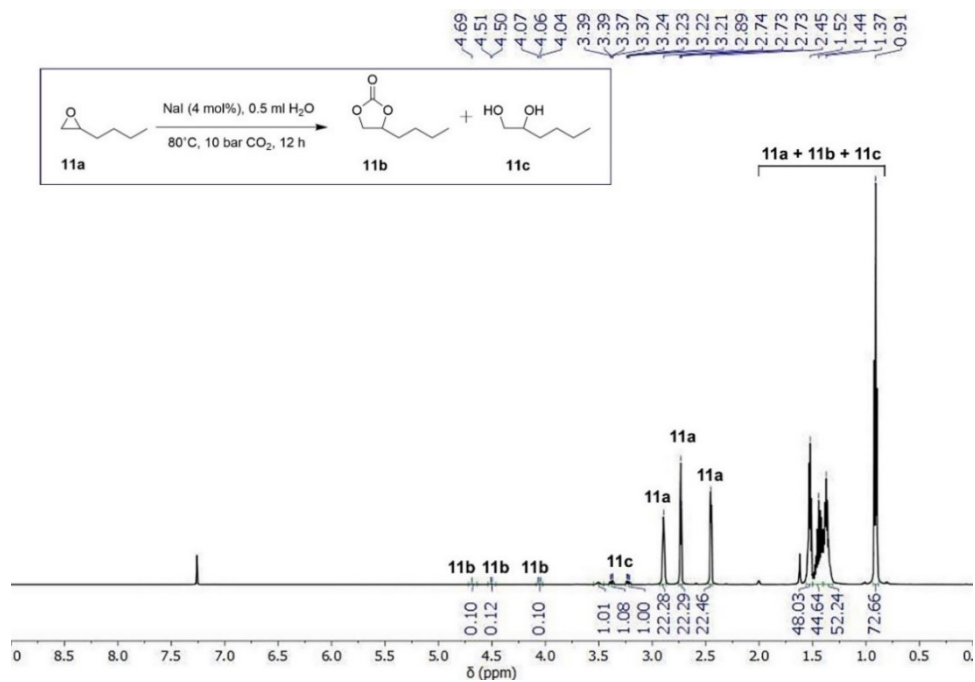

**Figure S88.** <sup>1</sup>H NMR (CDCl<sub>3</sub>) spectrum of crude CO<sub>2</sub> cycloaddition reaction to **11a**; **11a** (10 mmol), 4 mol% NaI, 0.5 mL H<sub>2</sub>O, 80 °C, 10 bar CO<sub>2</sub>, 12 h; Table 3, Entry 5.

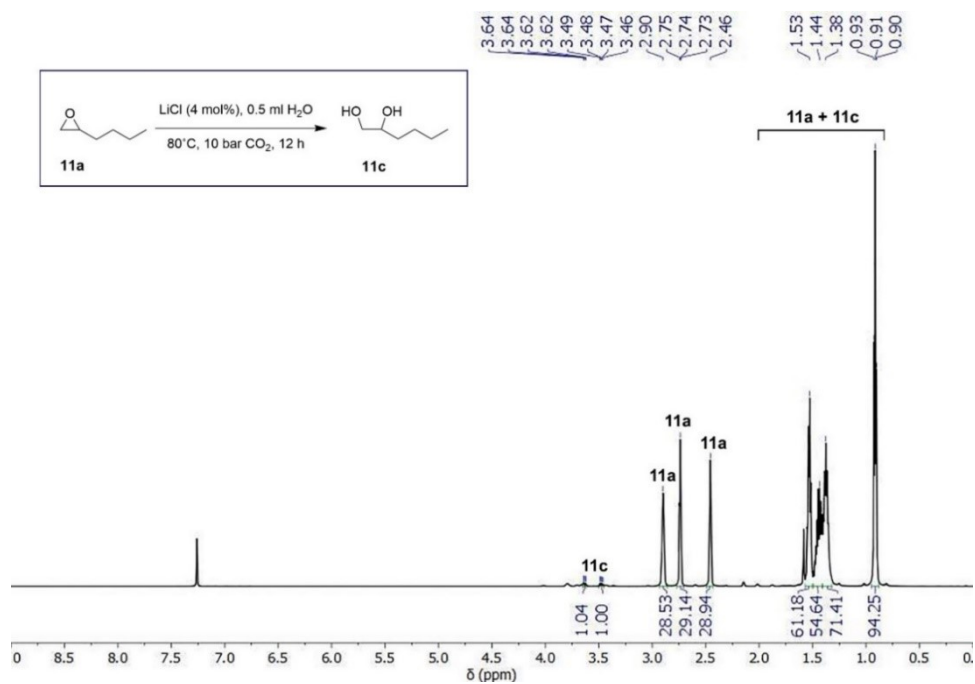

**Figure S89.** <sup>1</sup>H NMR (CDCl<sub>3</sub>) spectrum of crude CO<sub>2</sub> cycloaddition reaction to **11a**; **11a** (10 mmol), 4 mol% LiCl, 0.5 mL H<sub>2</sub>O, 80 °C, 10 bar CO<sub>2</sub>, 12 h; Table 3, Entry 6.



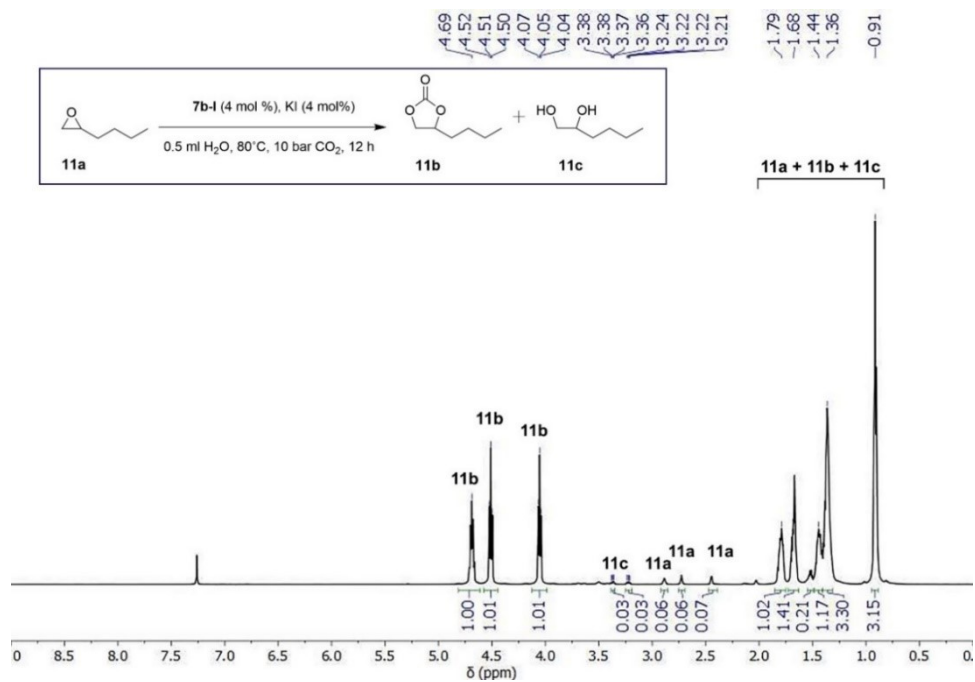

**Figure S90.** <sup>1</sup>H NMR (CDCl<sub>3</sub>) spectrum of crude CO<sub>2</sub> cycloaddition reaction to **11a**; **11a** (10 mmol), 4 mol% **7b-I**, 4 mol% KI, 0.5 mL H<sub>2</sub>O, 80 °C, 10 bar CO<sub>2</sub>, 12 h (1<sup>st</sup> run); Table 3, Entry 9.

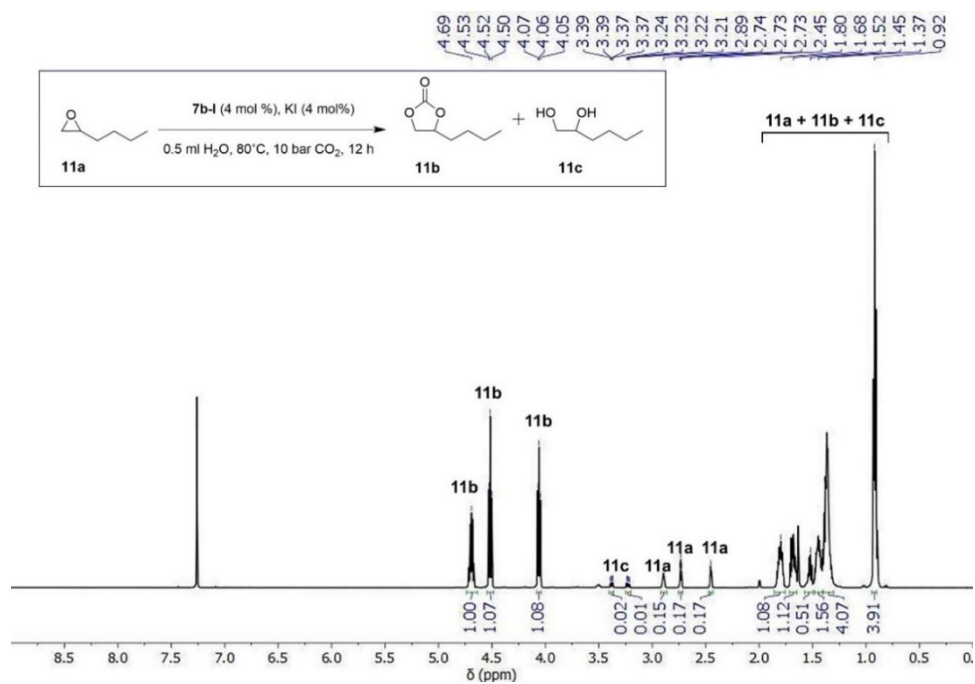

**Figure S91.** <sup>1</sup>H NMR (CDCl<sub>3</sub>) spectrum of crude CO<sub>2</sub> cycloaddition reaction to **11a**; **11a** (10 mmol), 4 mol% **7b-I**, 4 mol% KI, 0.5 mL H<sub>2</sub>O, 80 °C, 10 bar CO<sub>2</sub>, 12 h (2<sup>nd</sup> run).

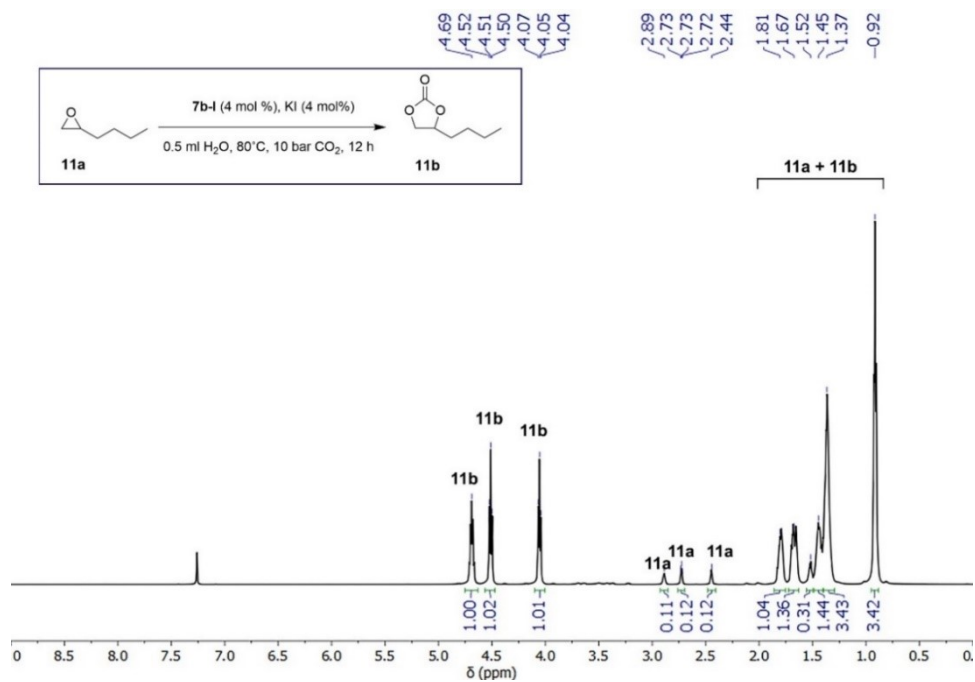

**Figure S92.** <sup>1</sup>H NMR (CDCl<sub>3</sub>) spectrum of crude CO<sub>2</sub> cycloaddition reaction to 11a; 11a (10 mmol), 4 mol% 7b-I, 4 mol% KI, 0.5 mL H<sub>2</sub>O, 80 °C, 10 bar CO<sub>2</sub>, 12 h (3<sup>rd</sup> run).

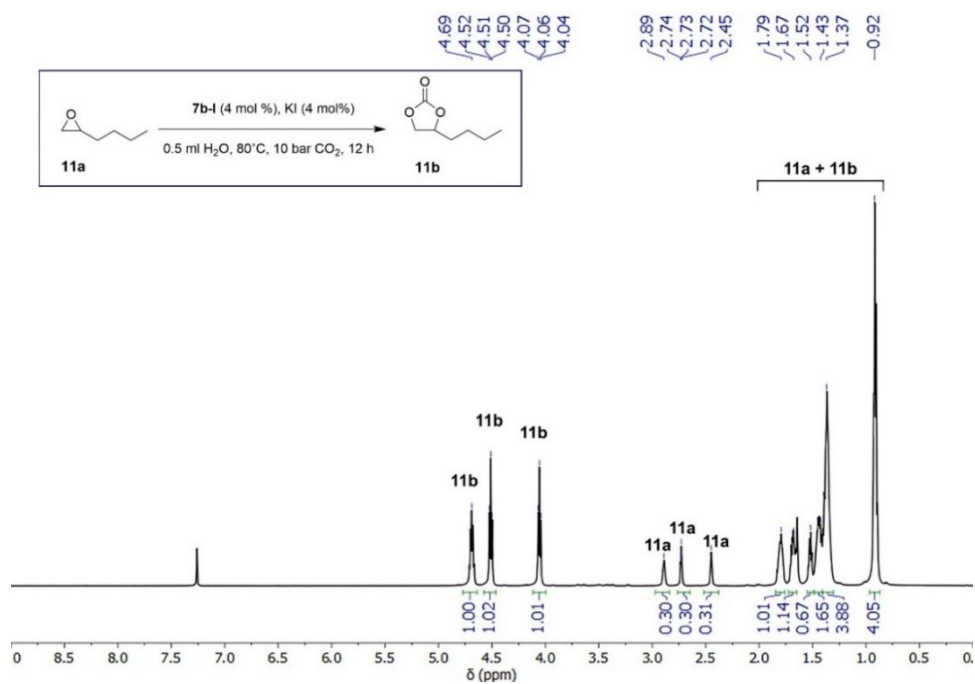

**Figure S93.** <sup>1</sup>H NMR (CDCl<sub>3</sub>) spectrum of crude CO<sub>2</sub> cycloaddition reaction to 11a; 11a (10 mmol), 4 mol% 7b-I, 4 mol% KI, 0.5 mL H<sub>2</sub>O, 80 °C, 10 bar CO<sub>2</sub>, 12 h (4<sup>th</sup> run).

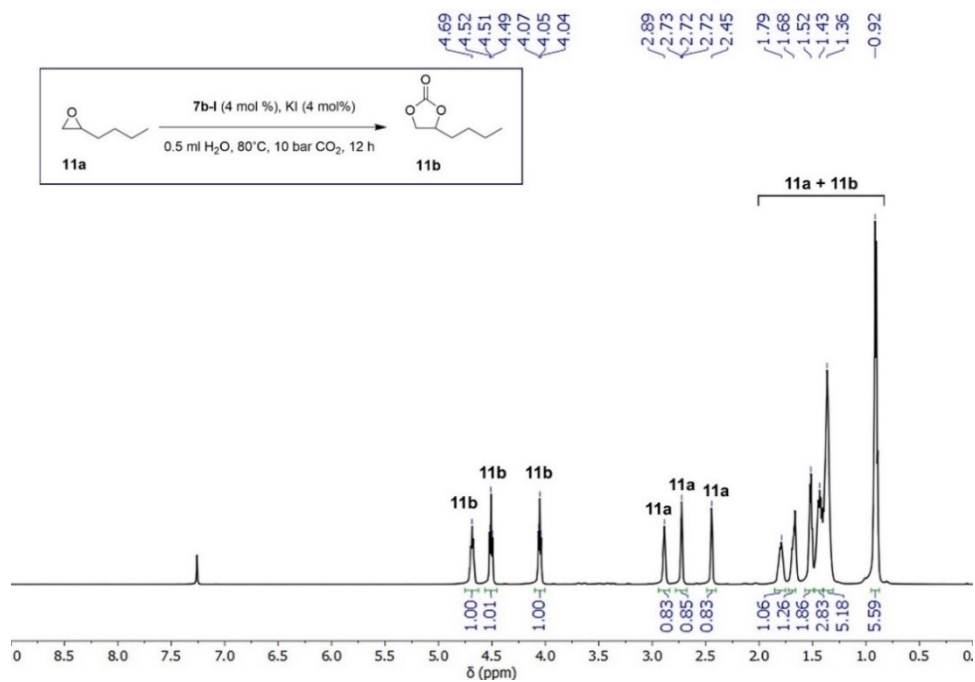

**Figure S94.** <sup>1</sup>H NMR (CDCl<sub>3</sub>) spectrum of crude CO<sub>2</sub> cycloaddition reaction to **11a**; **11a** (10 mmol), 4 mol% **7b-I**, 4 mol% KI, 0.5 mL H<sub>2</sub>O, 80 °C, 10 bar CO<sub>2</sub>, 12 h (5<sup>th</sup> run).

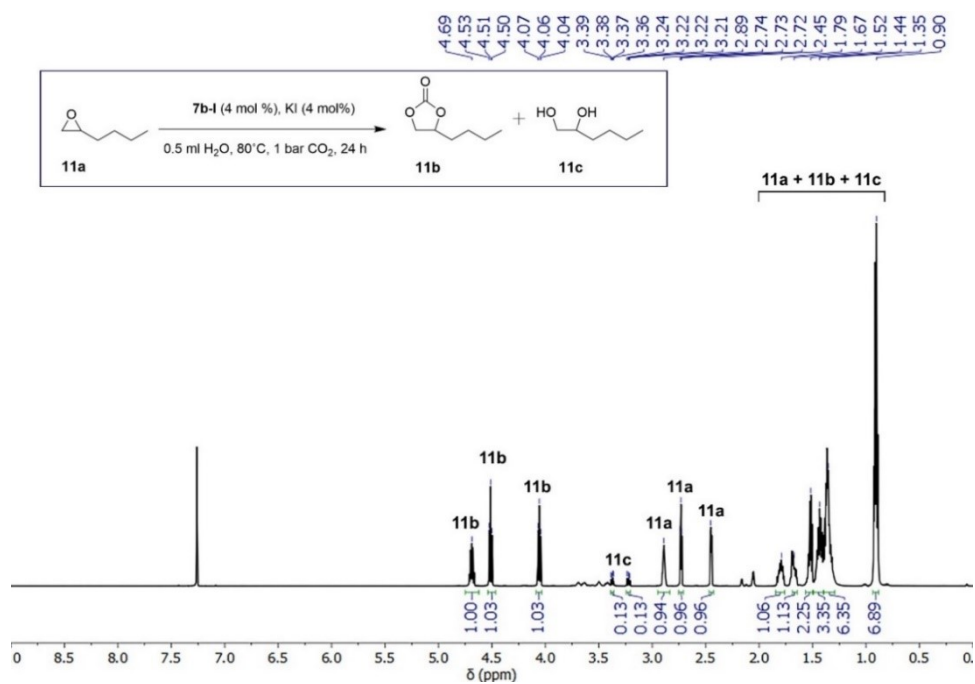

**Figure S95.** <sup>1</sup>H NMR (CDCl<sub>3</sub>) spectrum of crude CO<sub>2</sub> cycloaddition reaction to **11a**; **11a** (10 mmol), 4 mol% **7b-I**, 4 mol% KI, 0.5 mL H<sub>2</sub>O, 80 °C, 1 bar CO<sub>2</sub> (ballon), 24 h; Table 3, Entry 10.

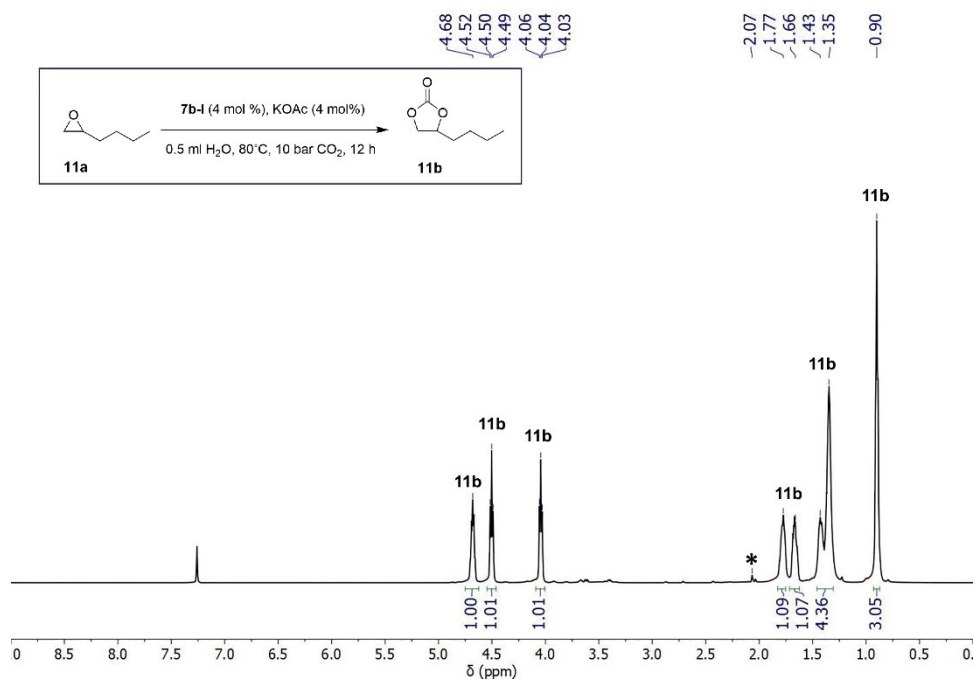

**Figure S96.** <sup>1</sup>H NMR (CDCl<sub>3</sub>) spectrum of crude CO<sub>2</sub> cycloaddition reaction to **11a**; **11a** (10 mmol), 4 mol% **7b-I**, 4 mol% KOAc (\*), 0.5 mL H<sub>2</sub>O, 80 °C, 10 bar CO<sub>2</sub>, 12 h (1<sup>st</sup> run); Table 3, Entry 11.

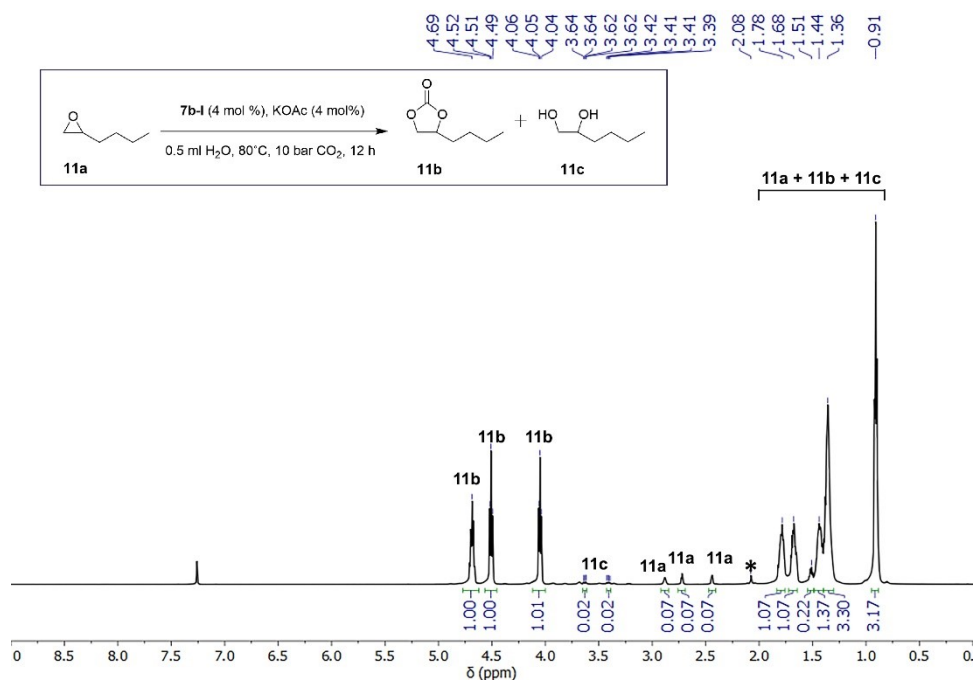

**Figure S97.** <sup>1</sup>H NMR (CDCl<sub>3</sub>) spectrum of crude CO<sub>2</sub> cycloaddition reaction to **11a**; **11a** (10 mmol), 4 mol% **7b-I**, 4 mol% KOAc (\*), 0.5 mL H<sub>2</sub>O, 80 °C, 10 bar CO<sub>2</sub>, 12 h (2<sup>nd</sup> run).

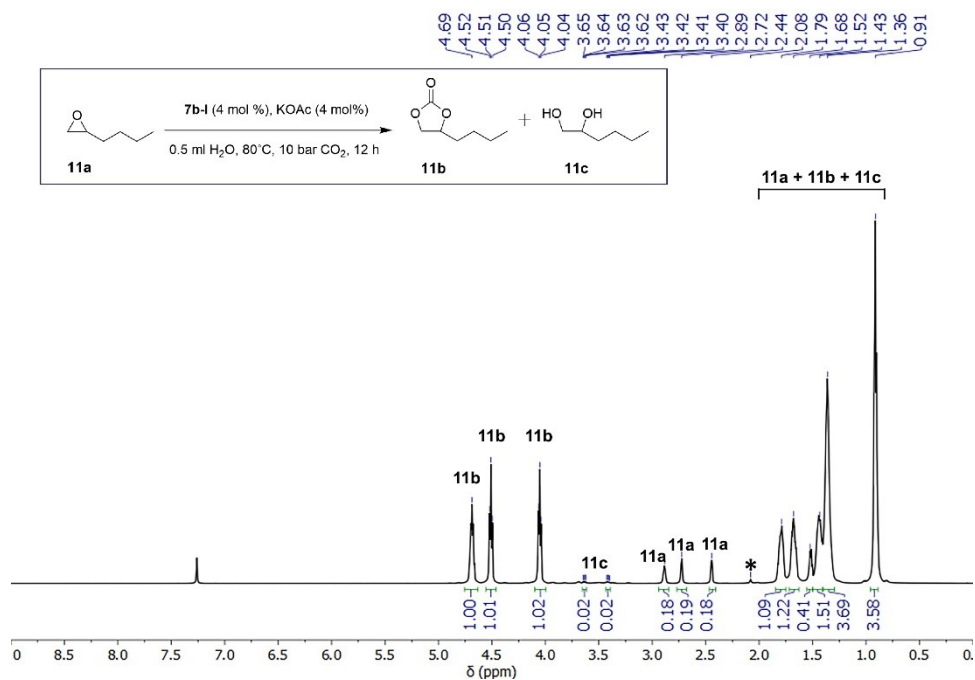

**Figure S98.** <sup>1</sup>H NMR (CDCl<sub>3</sub>) spectrum of crude CO<sub>2</sub> cycloaddition reaction to **11a**; **11a** (10 mmol), 4 mol% **7b-I**, 4 mol% KOAc (\*), 0.5 mL H<sub>2</sub>O, 80 °C, 10 bar CO<sub>2</sub>, 12 h (3<sup>rd</sup> run).

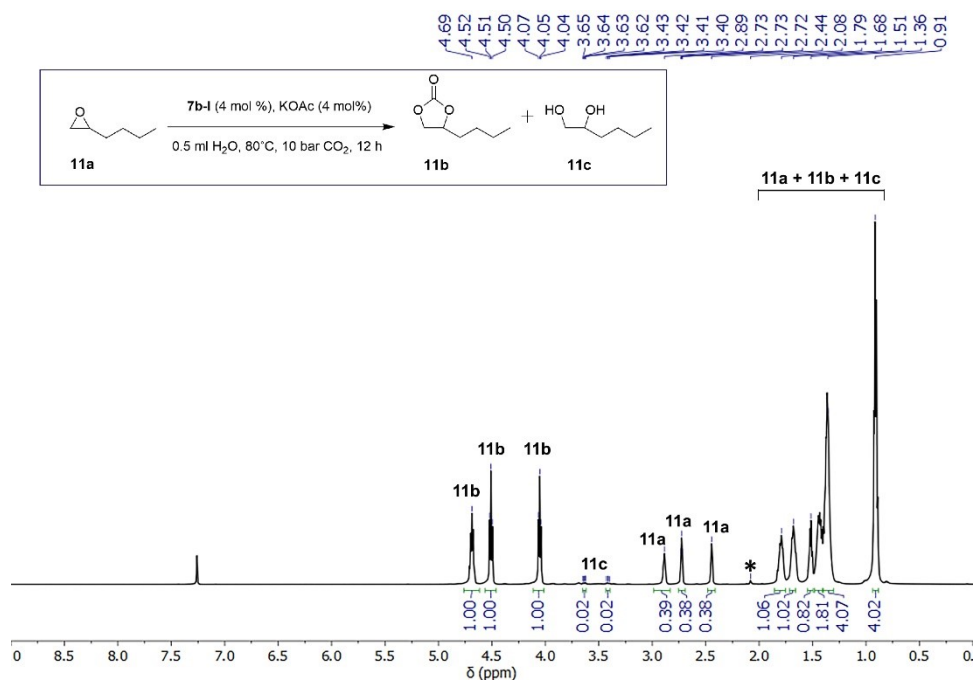

**Figure S99.** <sup>1</sup>H NMR (CDCl<sub>3</sub>) spectrum of crude CO<sub>2</sub> cycloaddition reaction to **11a**; **11a** (10 mmol), 4 mol% **7b-I**, 4 mol% KOAc (\*), 0.5 mL H<sub>2</sub>O, 80 °C, 10 bar CO<sub>2</sub>, 12 h (4<sup>th</sup> run).

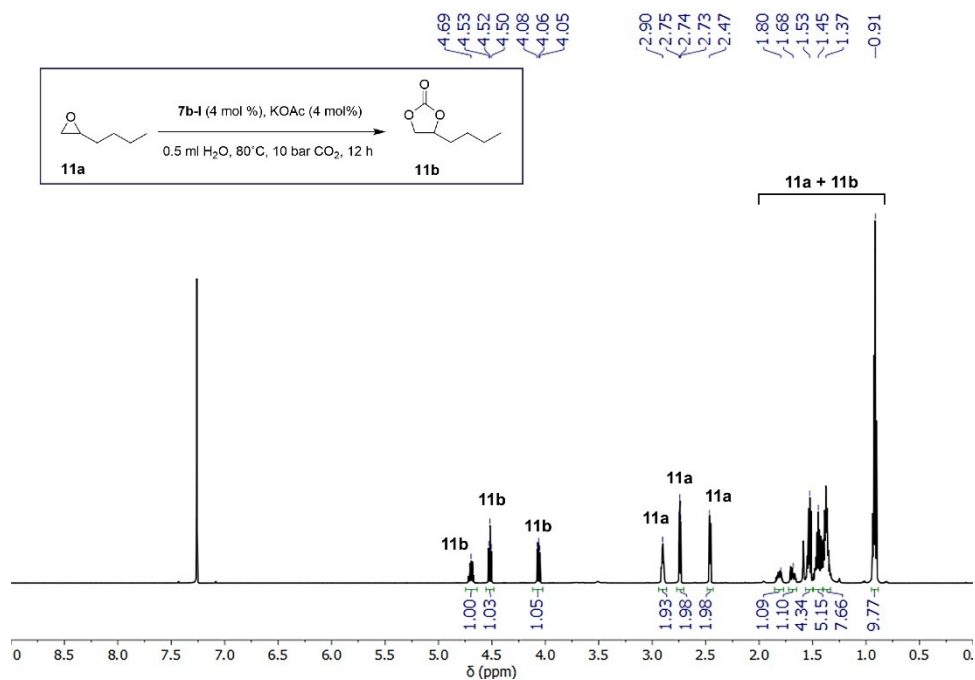

**Figure S100.** <sup>1</sup>H NMR (CDCl<sub>3</sub>) spectrum of crude CO<sub>2</sub> cycloaddition reaction to **11a**; **11a** (10 mmol), 4 mol% **7b-I**, 4 mol% KOAc, 0.5 mL H<sub>2</sub>O, 80 °C, 10 bar CO<sub>2</sub>, 12 h (5<sup>th</sup> run).

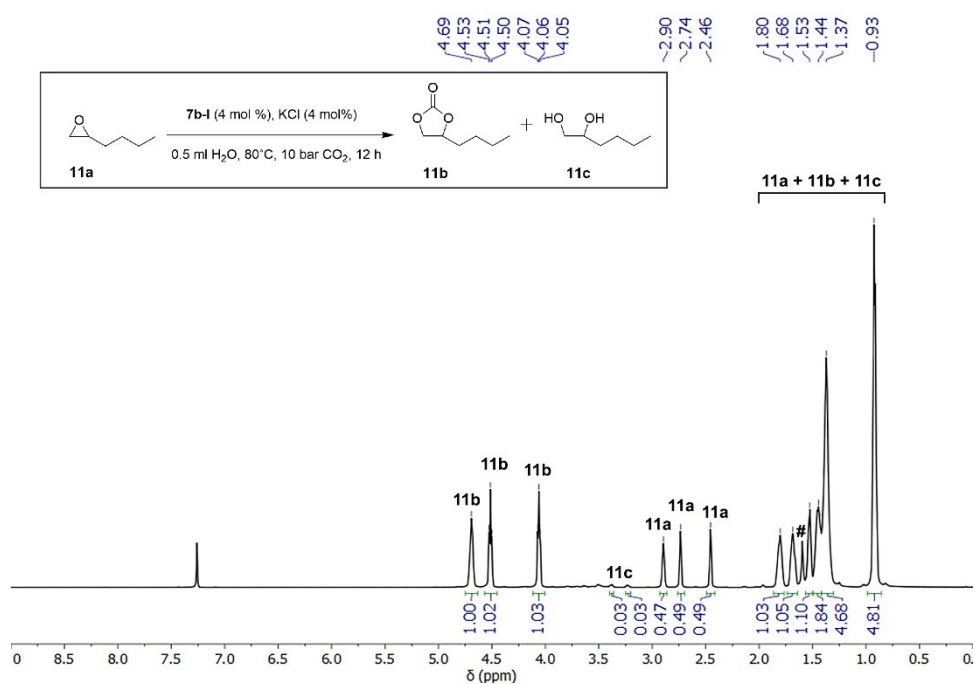

**Figure S101.** <sup>1</sup>H NMR (CDCl<sub>3</sub>) spectrum of crude CO<sub>2</sub> cycloaddition reaction to **11a**; **11a** (10 mmol), 4 mol% **7b-I**, 4 mol% KCl, 0.5 mL H<sub>2</sub>O, 80 °C, 10 bar CO<sub>2</sub>, 12 h; Table 3, Entry 12. (#) residual water signal in CDCl<sub>3</sub>.

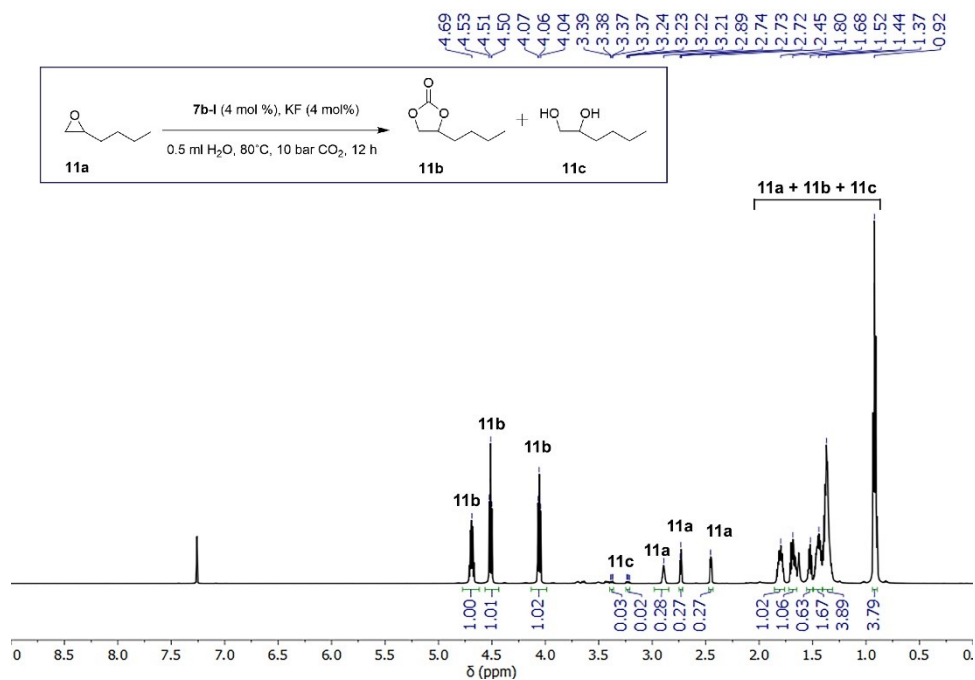

**Figure S102.** <sup>1</sup>H NMR (CDCl<sub>3</sub>) spectrum of crude CO<sub>2</sub> cycloaddition reaction to **11a**; **11a** (10 mmol), 4 mol% **7b-I**, 4 mol% KF, 0.5 mL H<sub>2</sub>O, 80 °C, 10 bar CO<sub>2</sub>, 12 h; Table 3, Entry 13.

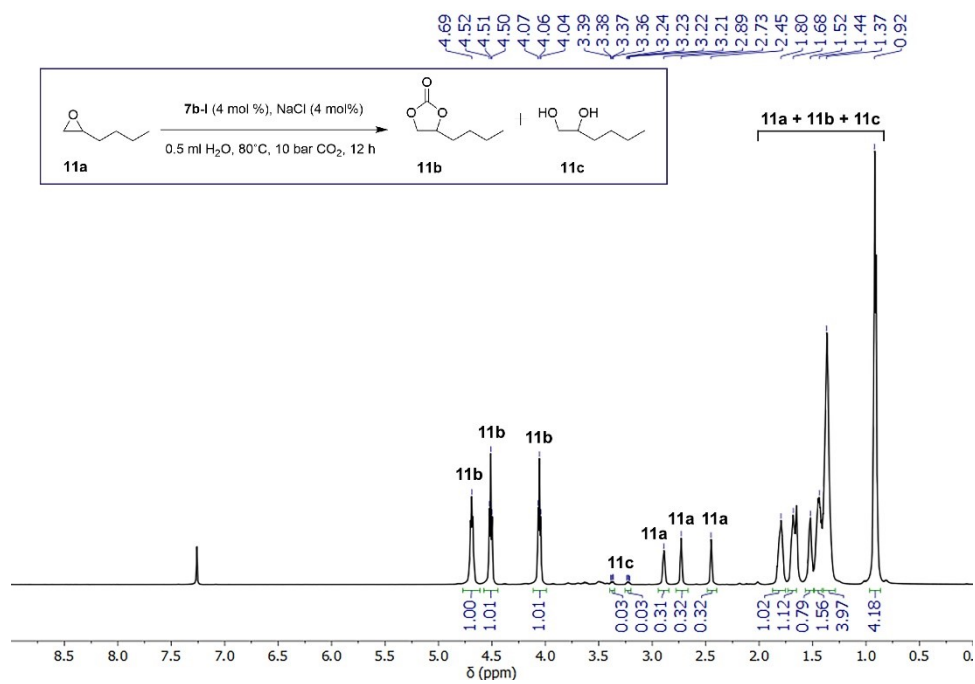

**Figure S103.** <sup>1</sup>H NMR (CDCl<sub>3</sub>) spectrum of crude CO<sub>2</sub> cycloaddition reaction to **11a**; **11a** (10 mmol), 4 mol% **7b-I**, 4 mol% NaCl, 0.5 mL H<sub>2</sub>O, 80 °C, 10 bar CO<sub>2</sub>, 12 h; Table 3, Entry 14.

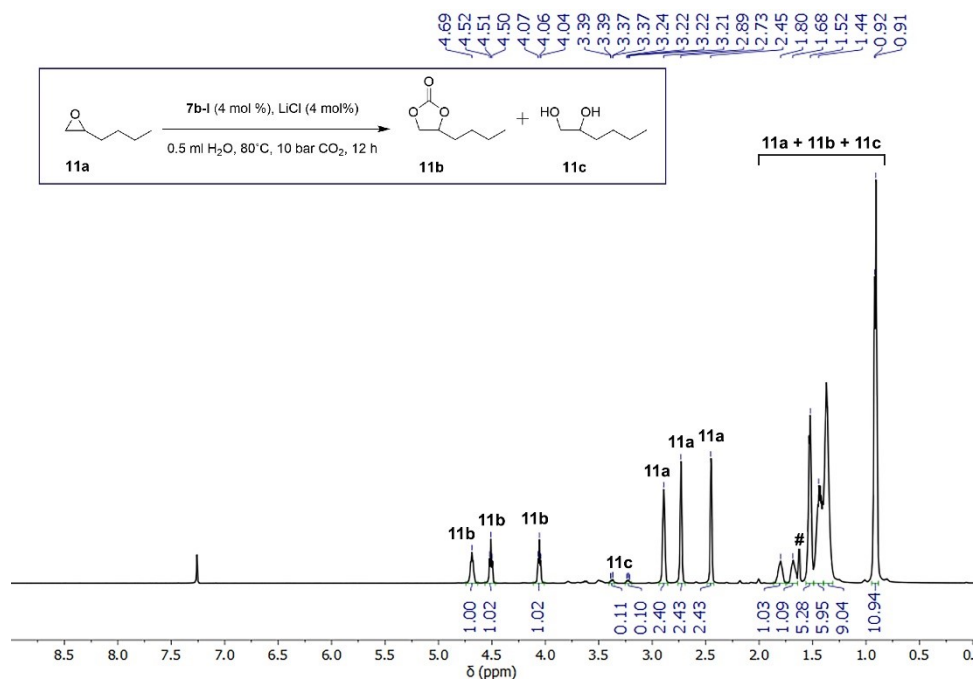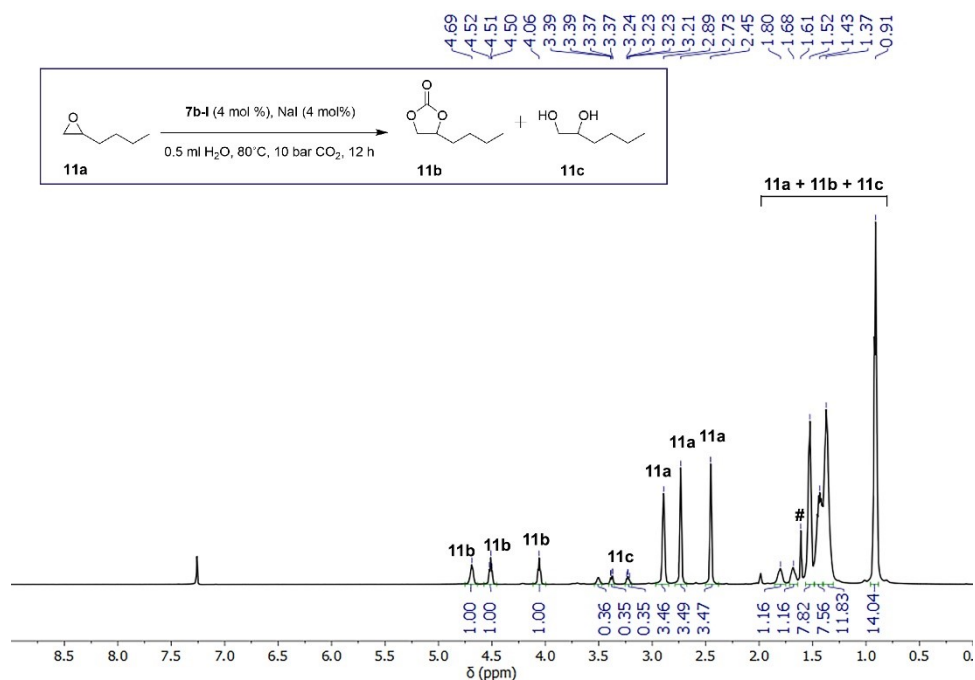



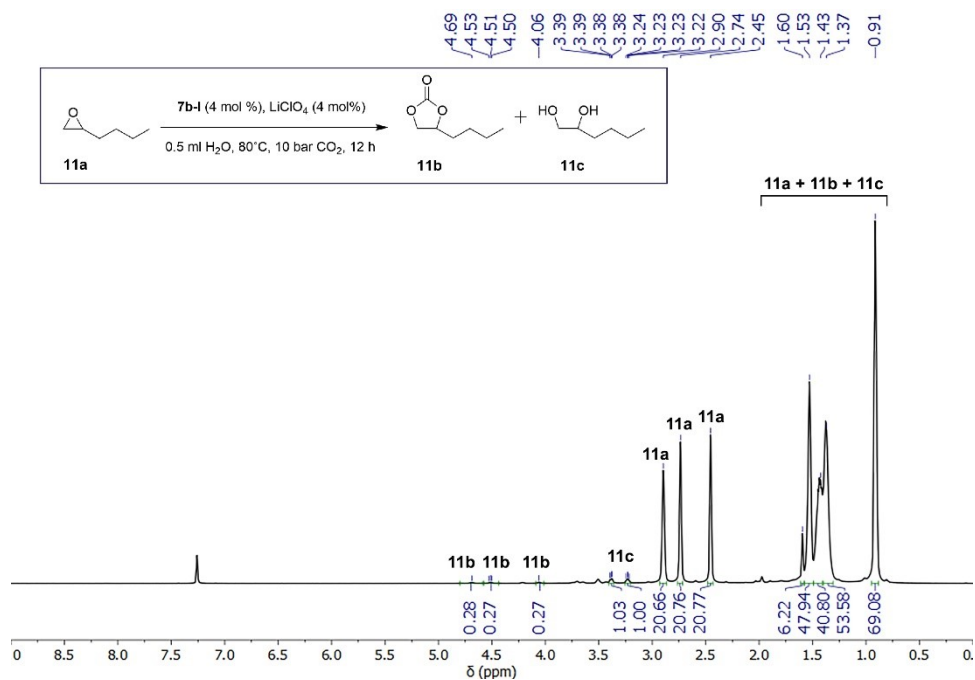

**Figure S106.** <sup>1</sup>H NMR (CDCl<sub>3</sub>) spectrum of crude CO<sub>2</sub> cycloaddition reaction to **11a**; **11a** (10 mmol), 4 mol% **7b-I**, 4 mol% LiClO<sub>4</sub>, 0.5 mL H<sub>2</sub>O, 80 °C, 10 bar CO<sub>2</sub>, 12 h; Table 3, Entry 17.

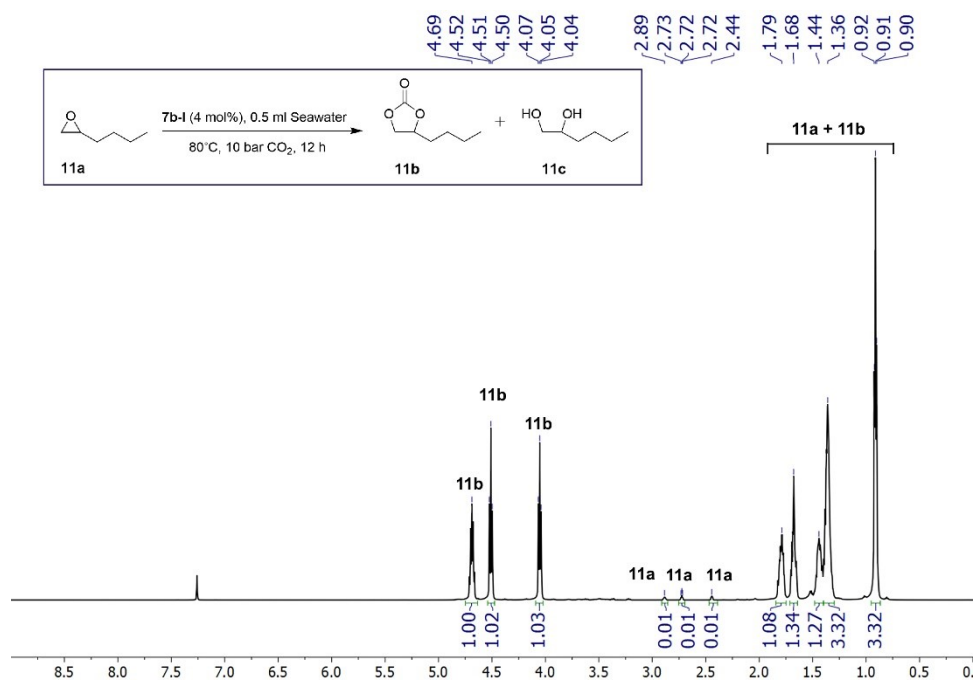

**Figure S107.** <sup>1</sup>H NMR (CDCl<sub>3</sub>) spectrum of crude CO<sub>2</sub> cycloaddition reaction to **11a**; **11a** (10 mmol), 4 mol% **7b-I**, 0.5 mL seawater, 80 °C, 10 bar CO<sub>2</sub>, 12 h; Table 3, Entry 19.

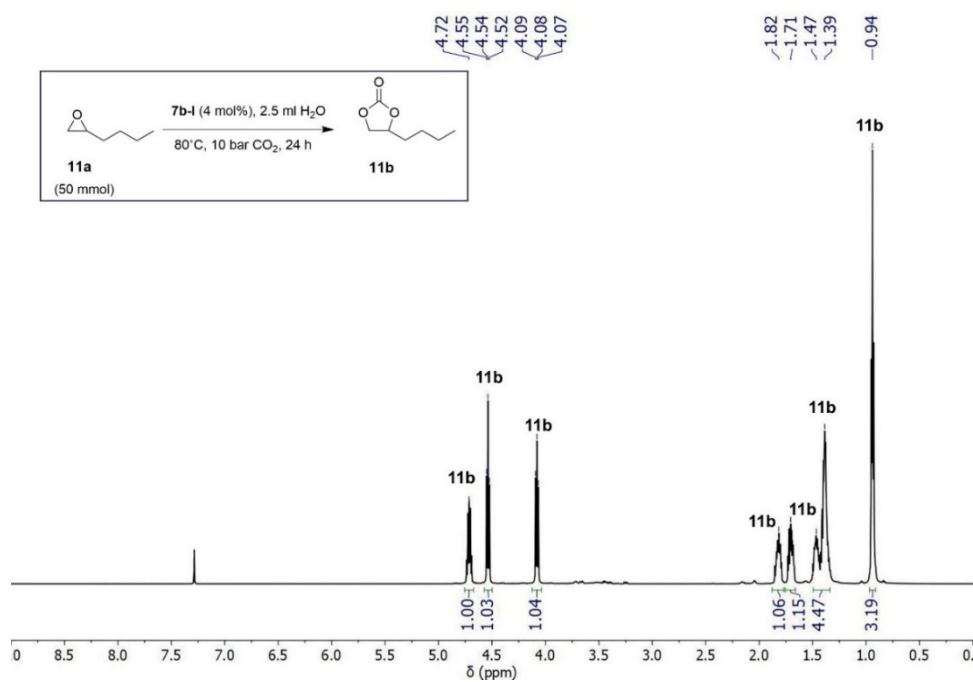

**Figure S108.** <sup>1</sup>H NMR (CDCl<sub>3</sub>) spectrum of the isolated organic layer for the CO<sub>2</sub> cycloaddition reaction to **11a**; **11a** (50 mmol), 4 mol% **7b-I**, 2.5 mL H<sub>2</sub>O, 80 °C, 10 bar CO<sub>2</sub>, 24 h; Table 4, Entry 1. The NMR spectrum matches the literature reference *J. Org. Chem.* 2005, 70, 1, 381–383.

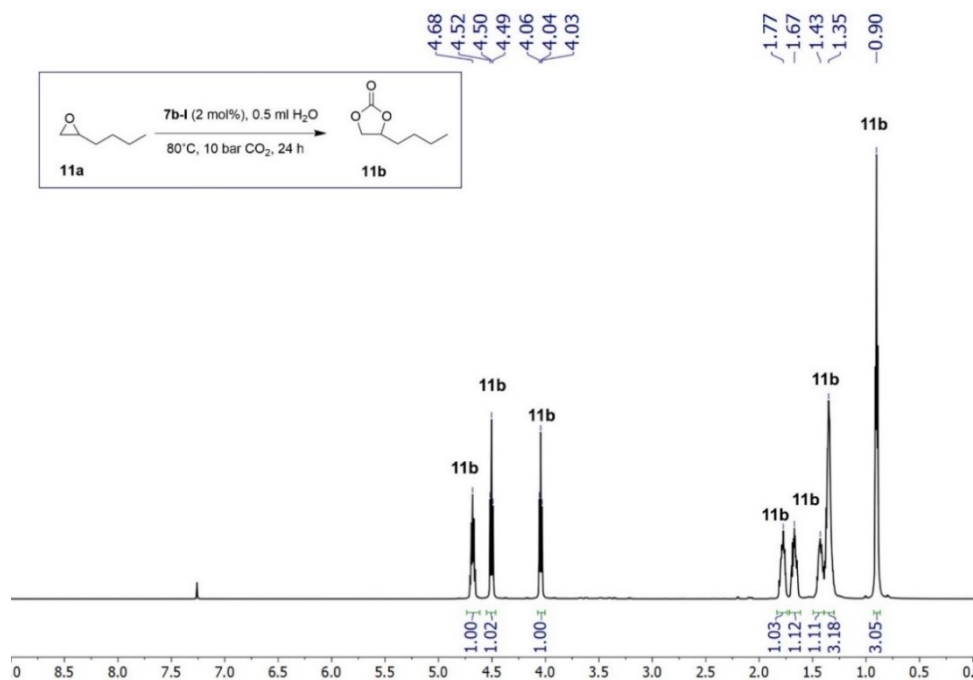

**Figure S109.** <sup>1</sup>H NMR (CDCl<sub>3</sub>) spectrum of the isolated organic layer for the CO<sub>2</sub> cycloaddition reaction to **11a**; **11a** (10 mmol), 2 mol% **7b-I**, 0.5 mL H<sub>2</sub>O, 80 °C, 10 bar CO<sub>2</sub>, 24 h; Table 4, Entry 1a. The NMR spectrum matches the literature reference *J. Org. Chem.* 2005, 70, 1, 381–383.

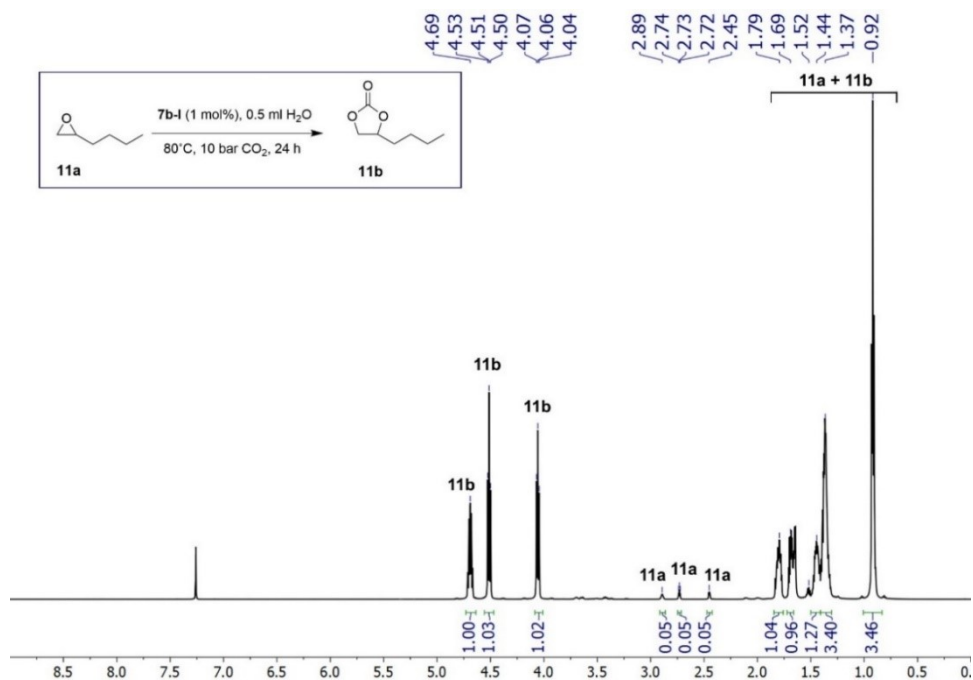

**Figure S110.** <sup>1</sup>H NMR (CDCl<sub>3</sub>) spectrum of the isolated organic layer for the CO<sub>2</sub> cycloaddition reaction to **11a**; **11a** (10 mmol), 1 mol% **7b-I**, 0.5 mL H<sub>2</sub>O, 80 °C, 10 bar CO<sub>2</sub>, 24 h; Table 4, Entry 1b.

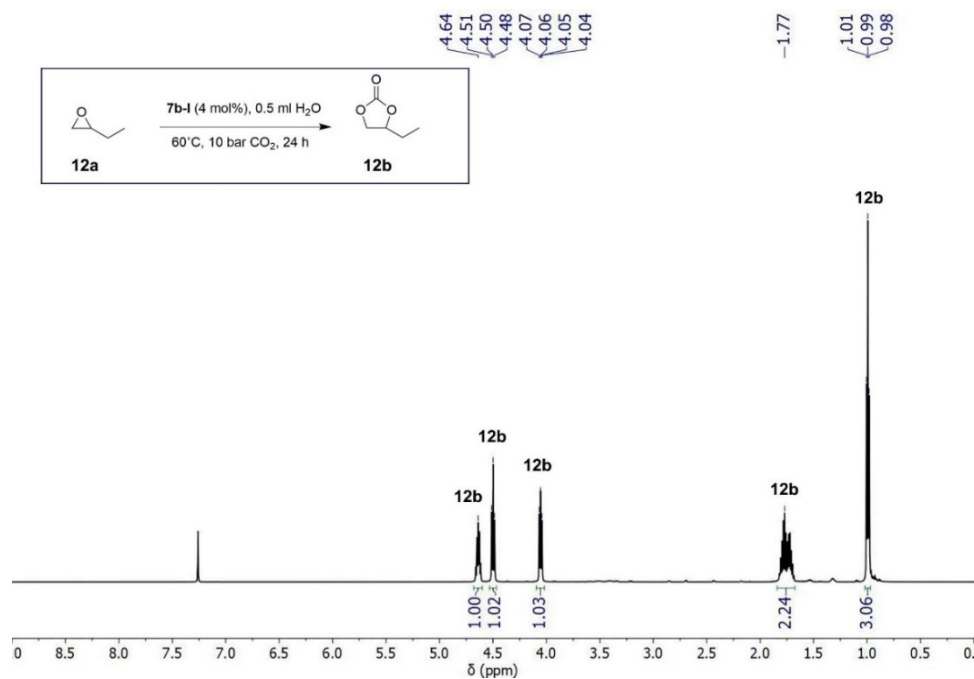

**Figure S111.** <sup>1</sup>H NMR (CDCl<sub>3</sub>) spectrum of the isolated organic layer for the CO<sub>2</sub> cycloaddition reaction to **12a**; **12a** (10 mmol), 4 mol% **7b-I**, 0.5 mL H<sub>2</sub>O, 60 °C, 10 bar CO<sub>2</sub>, 24 h; Table 4, Entry 2. The NMR spectrum matches the literature reference *J. Org. Chem.* 2018, 83, 24, 14969–14977.

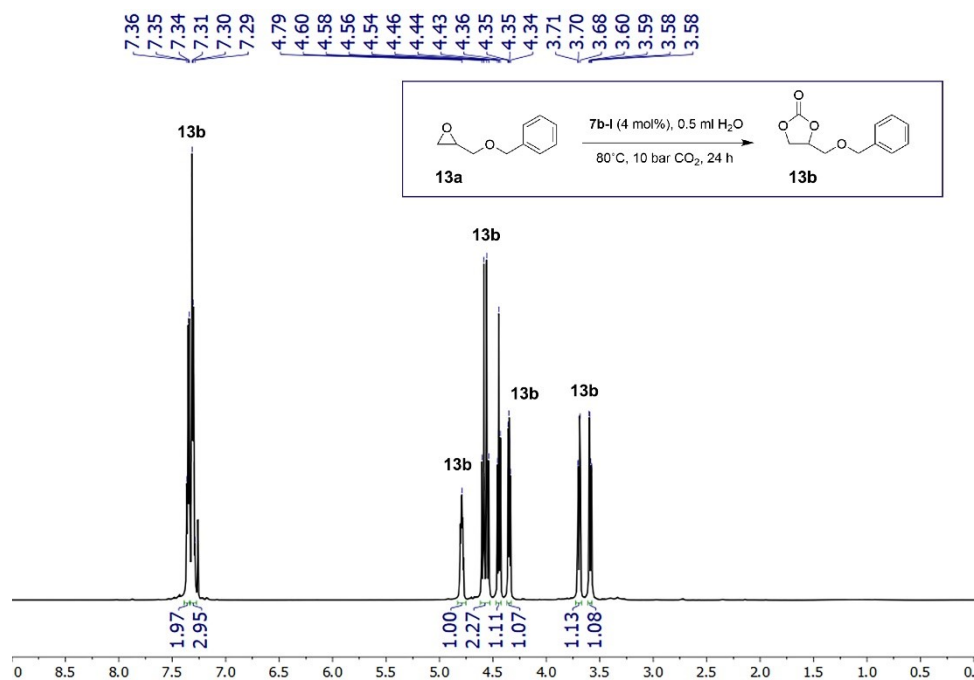

**Figure S112.**  $^1\text{H}$  NMR ( $\text{CDCl}_3$ ) spectrum of the isolated organic phase for the  $\text{CO}_2$  cycloaddition reaction to **13a**; **13a** (10 mmol), 4 mol% **7b-I**, 0.5 mL  $\text{H}_2\text{O}$ , 80 °C, 10 bar  $\text{CO}_2$ , 24 h; Table 4, Entry 3. The NMR spectrum matches the literature reference *J. Org. Chem.* 2019, 84, 23, 15578–15589.

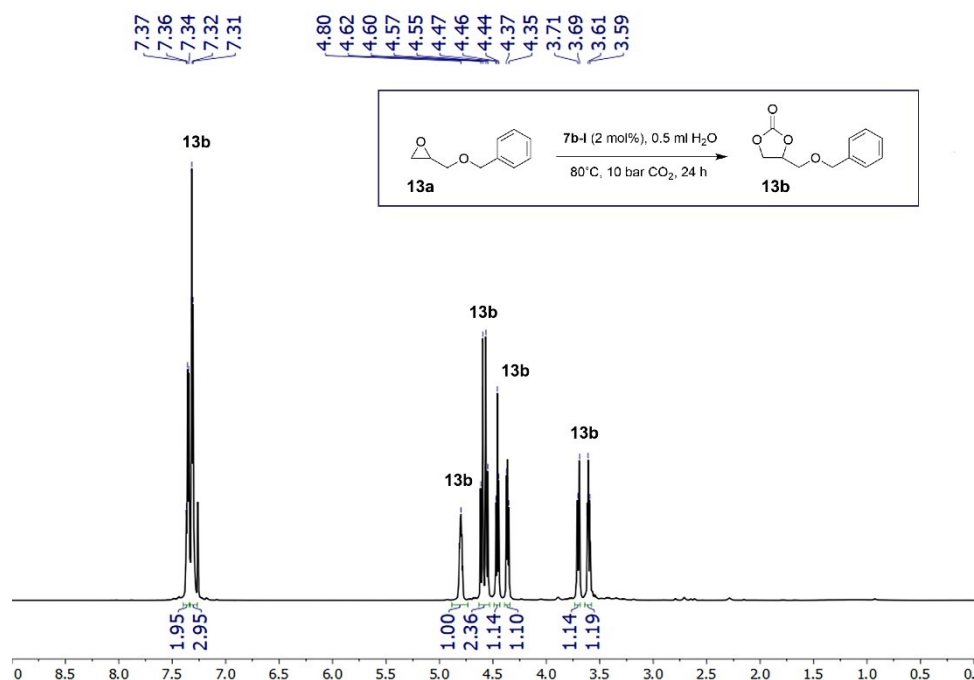

**Figure S113.**  $^1\text{H}$  NMR ( $\text{CDCl}_3$ ) spectrum of the isolated organic phase for the  $\text{CO}_2$  cycloaddition reaction to **13a**; **13a** (10 mmol), 2 mol% **7b-I**, 0.5 mL  $\text{H}_2\text{O}$ , 80 °C, 10 bar  $\text{CO}_2$ , 24 h; Table 4, Entry 3a. The NMR spectrum matches the literature reference *J. Org. Chem.* 2019, 84, 23, 15578–15589.

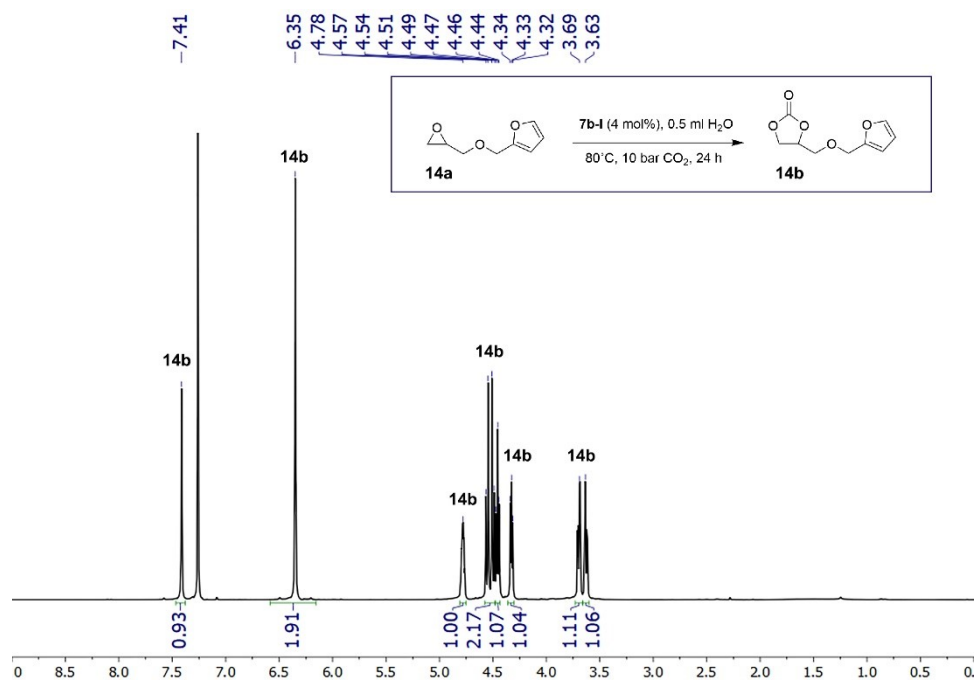

**Figure S114.**  $^1\text{H}$  NMR ( $\text{CDCl}_3$ ) spectrum of the isolated organic layer for the  $\text{CO}_2$  cycloaddition reaction to **14a**; **14a** (10 mmol), 4 mol% **7b-I**, 0.5 mL  $\text{H}_2\text{O}$ , 80 °C, 10 bar  $\text{CO}_2$ , 24 h; Table 4, Entry 4. The NMR spectrum matches the literature reference *Catal. Sci. Technol.* 2018, 8, 1981-1987.

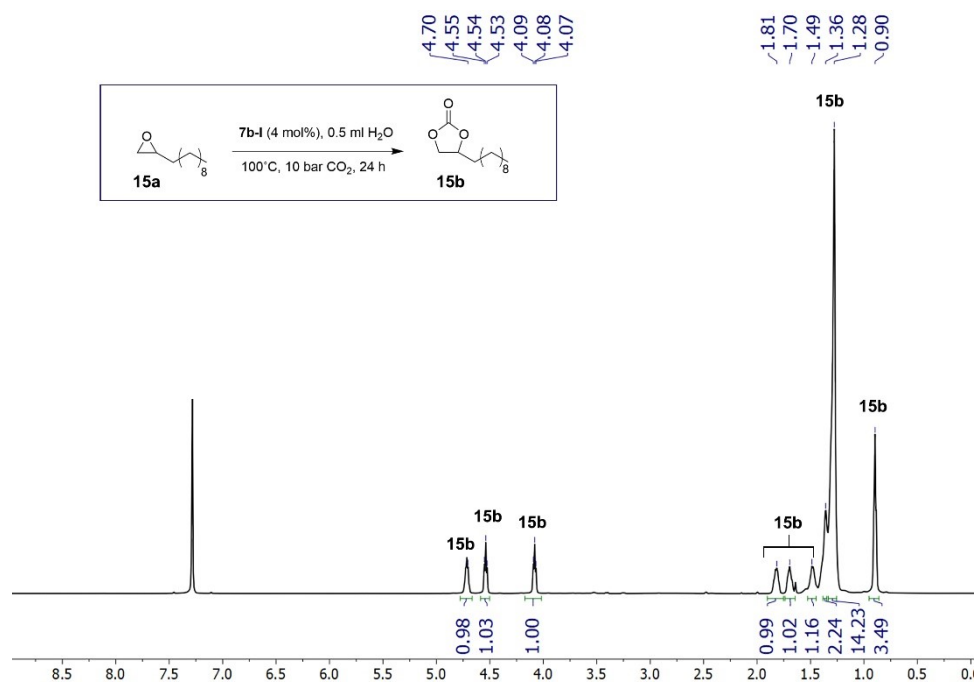

**Figure S115.**  $^1\text{H}$  NMR ( $\text{CDCl}_3$ ) spectrum of the isolated organic layer for the  $\text{CO}_2$  cycloaddition reaction to **15a**; **15a** (10 mmol), 4 mol% **7b-I**, 0.5 mL  $\text{H}_2\text{O}$ , 100 °C, 10 bar  $\text{CO}_2$ , 24 h; Table 4, Entry 5. The NMR spectrum matches the literature reference *ChemSusChem.* 2016, 9, 749-755.

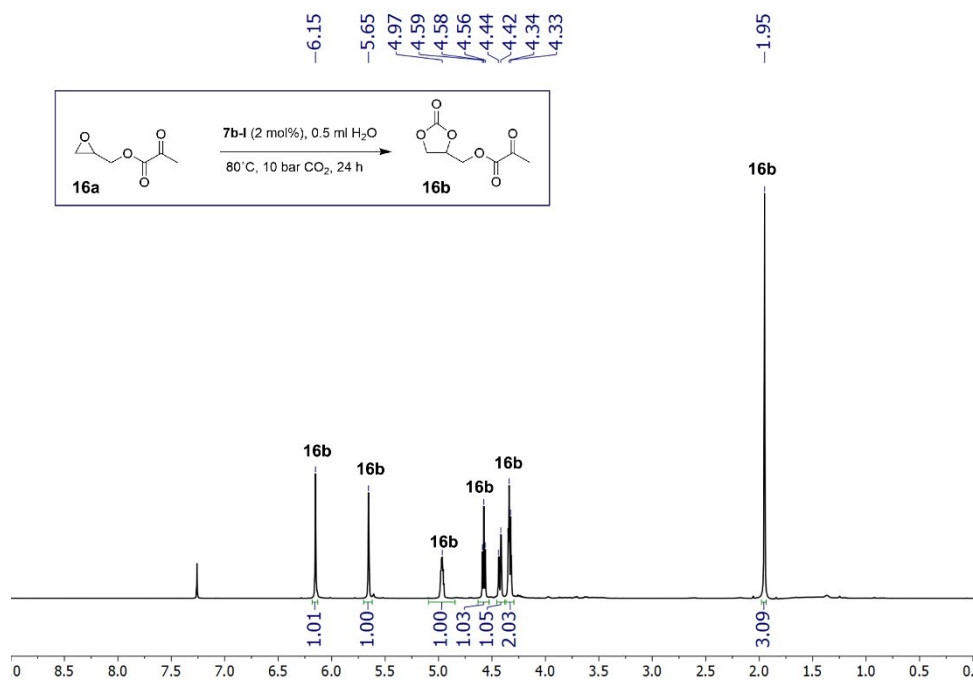

**Figure S116.** <sup>1</sup>H NMR (CDCl<sub>3</sub>) spectrum of the isolated organic layer for the CO<sub>2</sub> cycloaddition reaction to **16a**; **16a** (10 mmol), 2 mol% **7b-I**, 0.5 mL H<sub>2</sub>O, 80 °C, 10 bar CO<sub>2</sub>, 24 h; Table 4, Entry 6. The NMR spectrum matches the literature reference *Eur. Polym. J.* 2014, 61, 133–144.

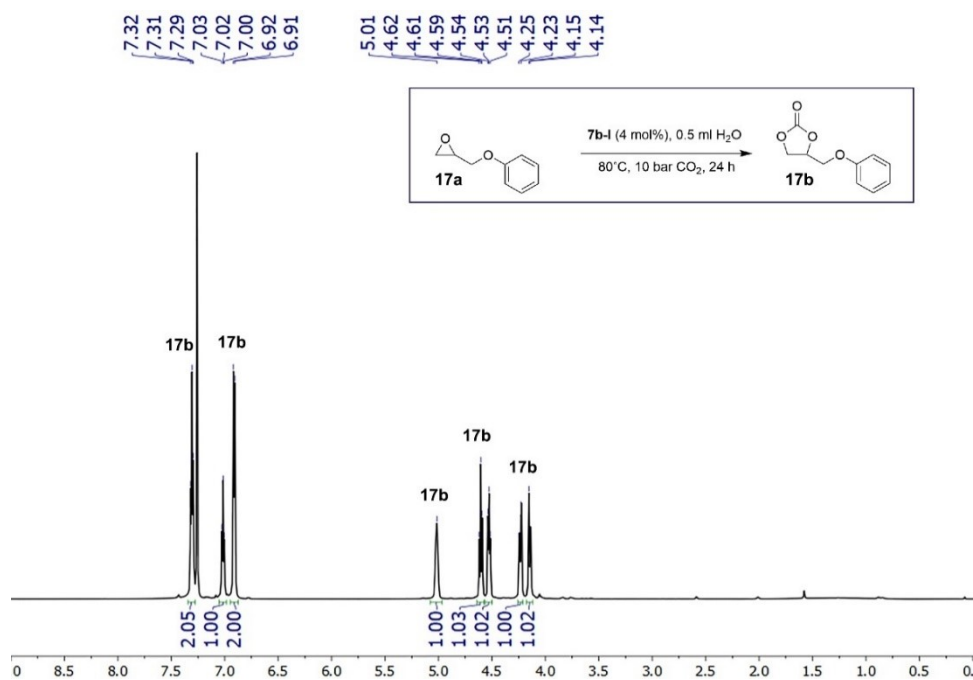

**Figure S117.** <sup>1</sup>H NMR (CDCl<sub>3</sub>) spectrum of the isolated organic layer for the CO<sub>2</sub> cycloaddition reaction to **17a**; **17a** (10 mmol), 4 mol% **7b-I**, 0.5 mL H<sub>2</sub>O, 80 °C, 10 bar CO<sub>2</sub>, 24 h; Table 4, Entry 7. The NMR spectrum matches the literature reference *J. Org. Chem.* 2005, 70, 1, 381–383.

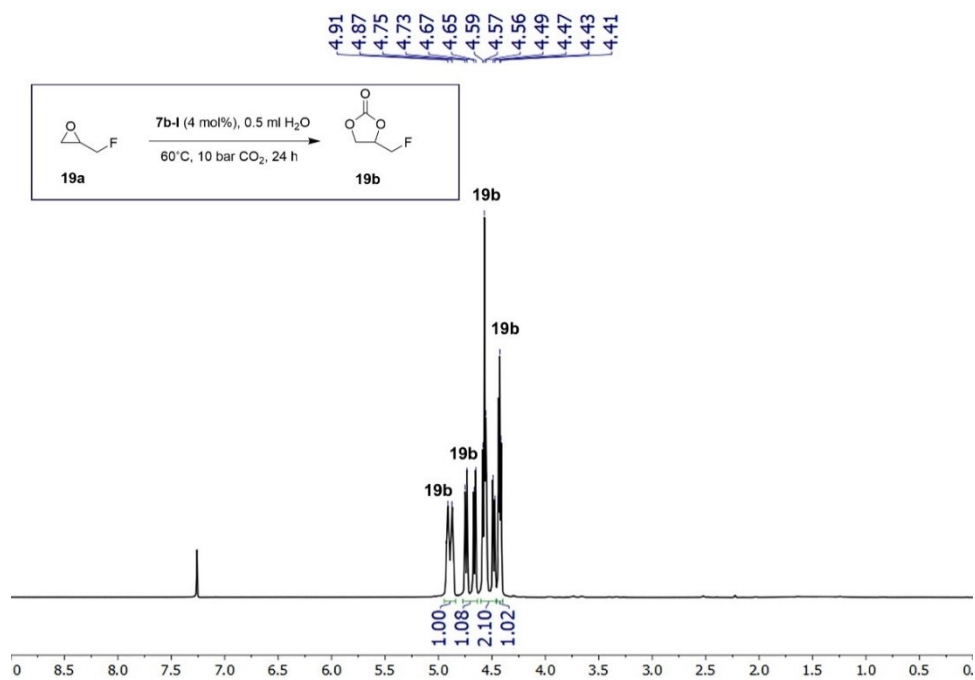

**Figure S118.**  $^1\text{H}$  NMR ( $\text{CDCl}_3$ ) spectrum of the isolated organic phase for the  $\text{CO}_2$  cycloaddition reaction to **19a**; **19a** (10 mmol), 4 mol% **7b-I**, 0.5 mL  $\text{H}_2\text{O}$ , 60 °C, 10 bar  $\text{CO}_2$ , 24 h; Table 4, Entry 8. The NMR spectrum matches the literature reference *J. Am. Chem. Soc.* 2015, 137, 30, 9571–9574.

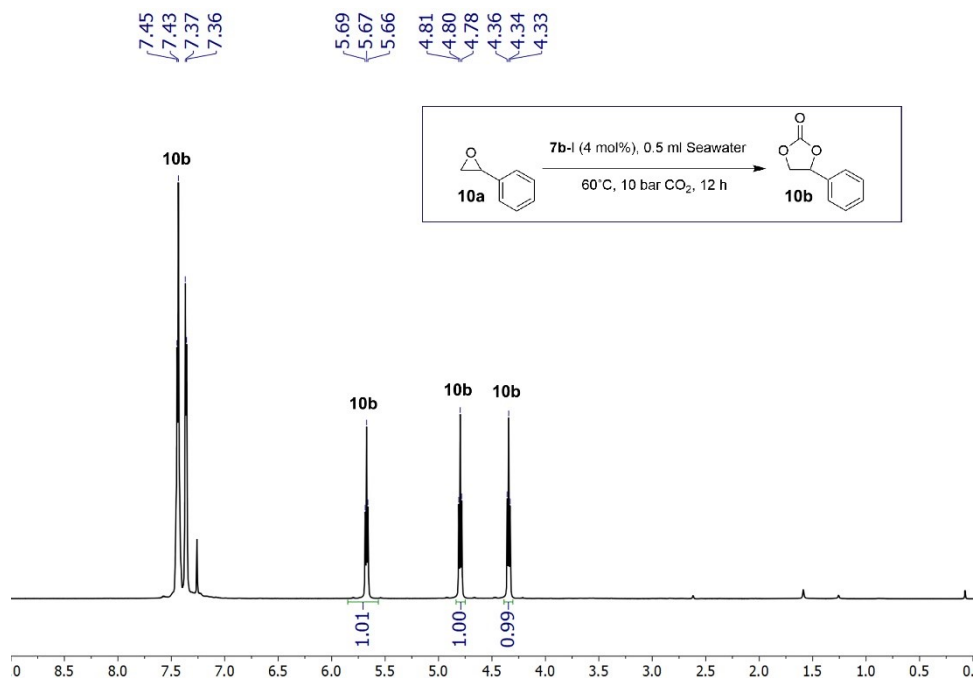

**Figure S119.**  $^1\text{H}$  NMR ( $\text{CDCl}_3$ ) spectrum of the isolated organic layer for the  $\text{CO}_2$  cycloaddition reaction to **10a**; **10a** (10 mmol), 4 mol% **7b-I** (\*), 0.5 mL seawater, 60 °C, 10 bar  $\text{CO}_2$ , 12 h; Table 4, Entry 9. The NMR spectrum matches the literature reference *J. Org. Chem.* 2005, 70, 1, 381–383.

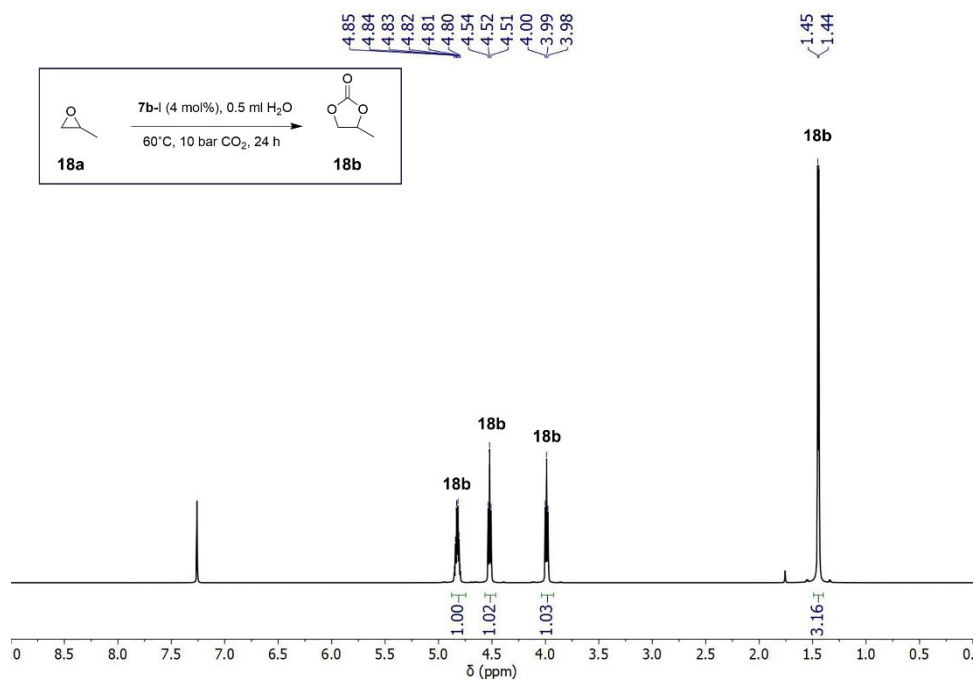

**Figure S120.**  $^1\text{H}$  NMR ( $\text{CDCl}_3$ ) spectrum of the isolated organic layer for the  $\text{CO}_2$  cycloaddition reaction to **18a**; **18a** (10 mmol), 4 mol% **7b-I**, 0.5 mL  $\text{H}_2\text{O}$ , 60 °C, 10 bar  $\text{CO}_2$ , 24 h; Table 4, Entry 10. The NMR spectrum matches the literature reference *J. Org. Chem.* 2005, 70, 1, 381–383.

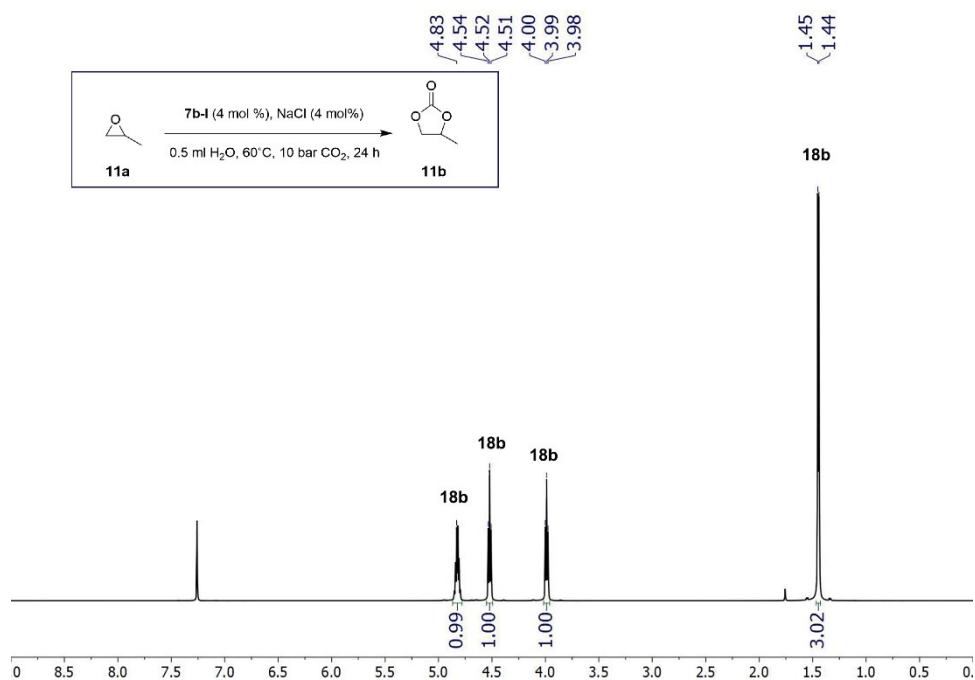

**Figure S121.**  $^1\text{H}$  NMR ( $\text{CDCl}_3$ ) spectrum of the isolated organic layer for the  $\text{CO}_2$  cycloaddition reaction to **18a**; **18a** (10 mmol), 4 mol% **7b-I**, 4 mol% NaCl, 0.5 mL  $\text{H}_2\text{O}$ , 60 °C, 10 bar  $\text{CO}_2$ , 24 h; Table 4, Entry 10a. The NMR spectrum matches the literature reference *J. Org. Chem.* 2005, 70, 1, 381–383.



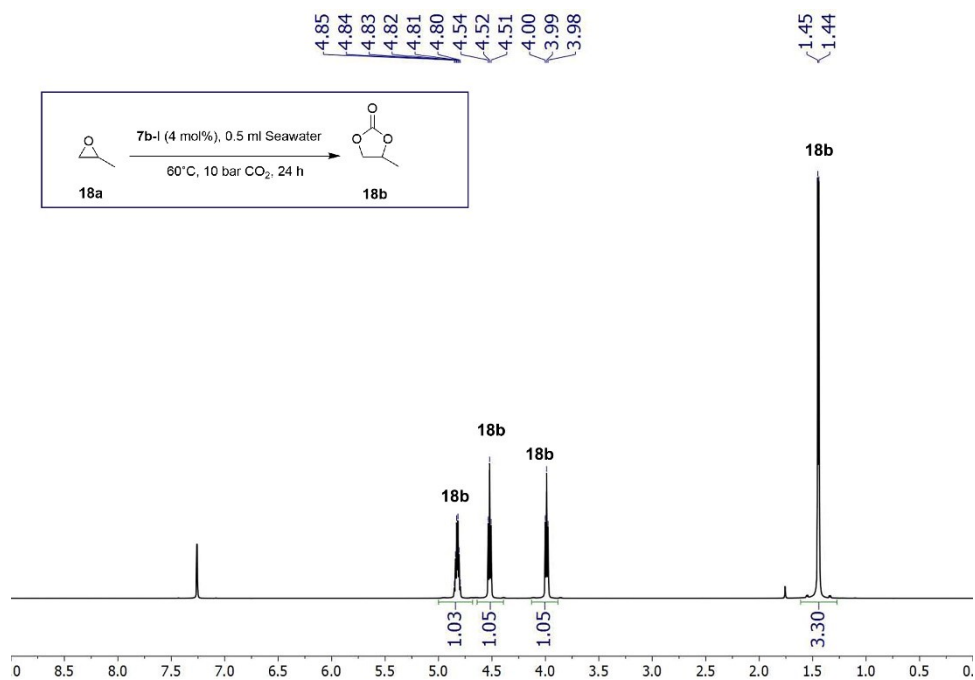

**Figure S122.**  $^1\text{H}$  NMR ( $\text{CDCl}_3$ ) spectrum of the isolated organic layer for the  $\text{CO}_2$  cycloaddition reaction to **18a**; **18a** (10 mmol), 4 mol% **7b-I**, 0.5 mL seawater, 60 °C, 10 bar  $\text{CO}_2$ , 24 h; Table 4, Entry 10b. The NMR spectrum matches the literature reference *J. Org. Chem.* 2005, 70, 1, 381–383.

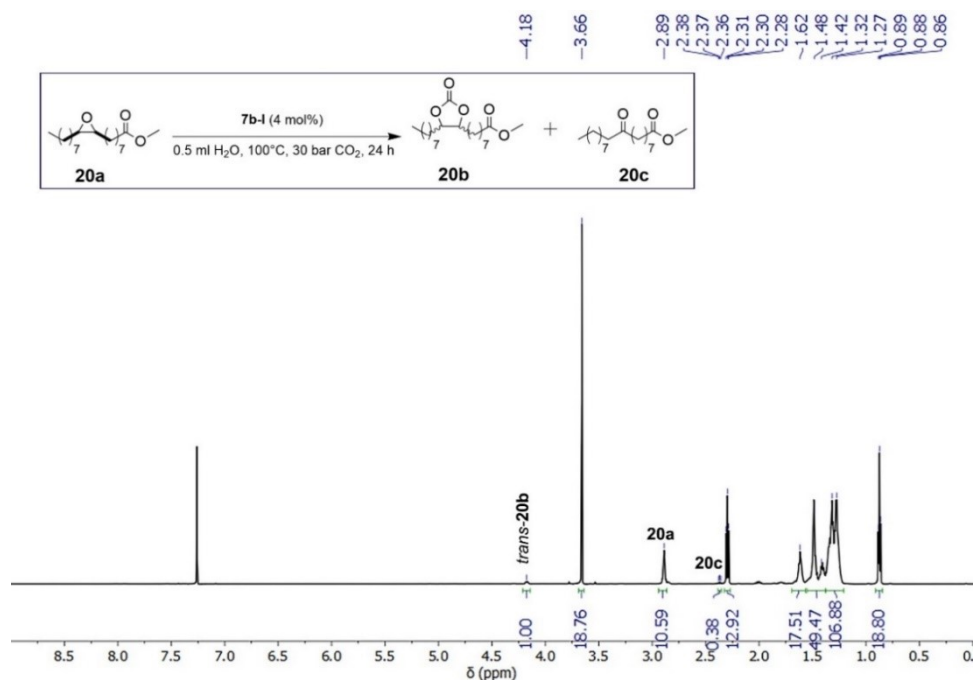

**Figure S123.**  $^1\text{H}$  NMR ( $\text{CDCl}_3$ ) spectrum of crude  $\text{CO}_2$  cycloaddition reaction to **20a**; **20a** (1.5 mmol), 4 mol% **7b-I**, 0.5 mL  $\text{H}_2\text{O}$ , 100 °C, 30 bar  $\text{CO}_2$ , 24 h; Table 5, Entry 1.

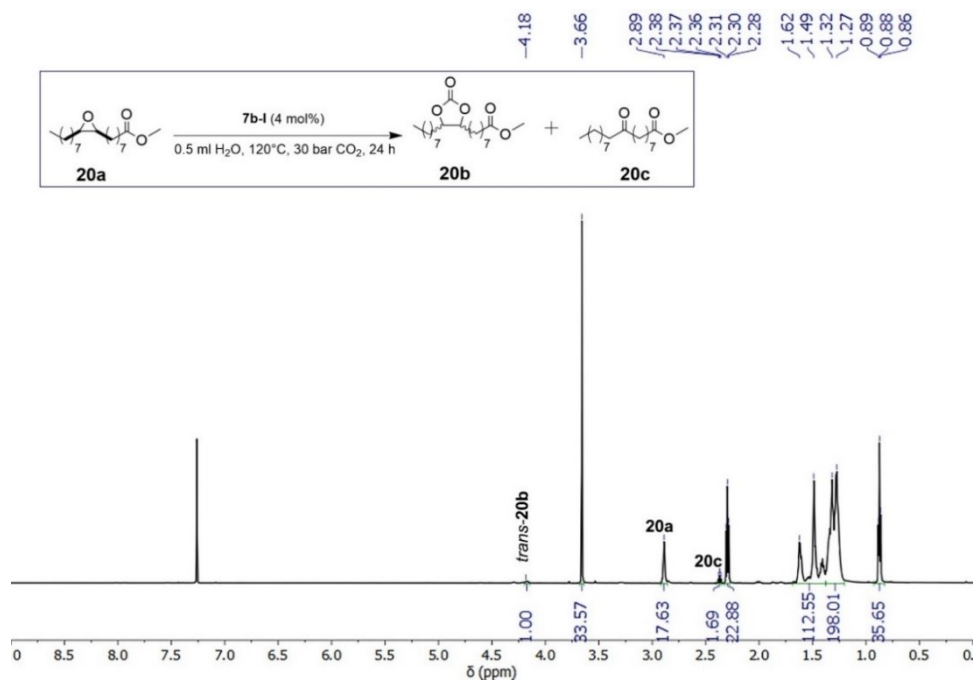

**Figure S124.** <sup>1</sup>H NMR (CDCl<sub>3</sub>) spectrum of crude CO<sub>2</sub> cycloaddition reaction to **20a**; **20a** (1.5 mmol), 4 mol% **7b-I**, 0.5 mL H<sub>2</sub>O, 120 °C, 30 bar CO<sub>2</sub>, 24 h; Table 5, Entry 2.

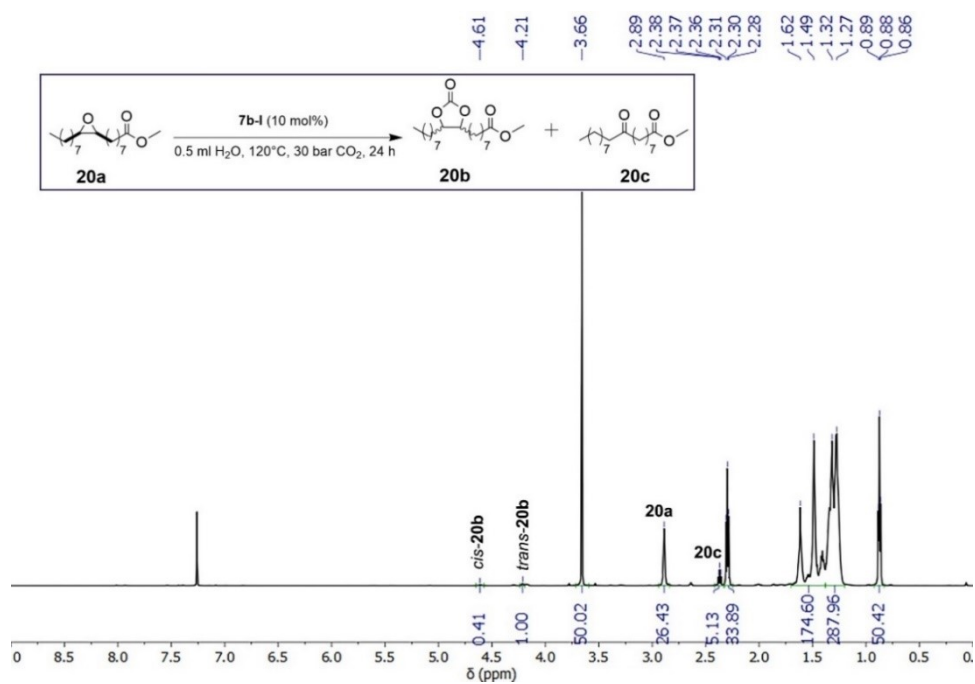

**Figure S125.** <sup>1</sup>H NMR (CDCl<sub>3</sub>) spectrum of crude CO<sub>2</sub> cycloaddition reaction to **20a**; **20a** (1.5 mmol), 10 mol% **7b-I**, 0.5 mL H<sub>2</sub>O, 120 °C, 30 bar CO<sub>2</sub>, 24 h; Table 5, Entry 3.

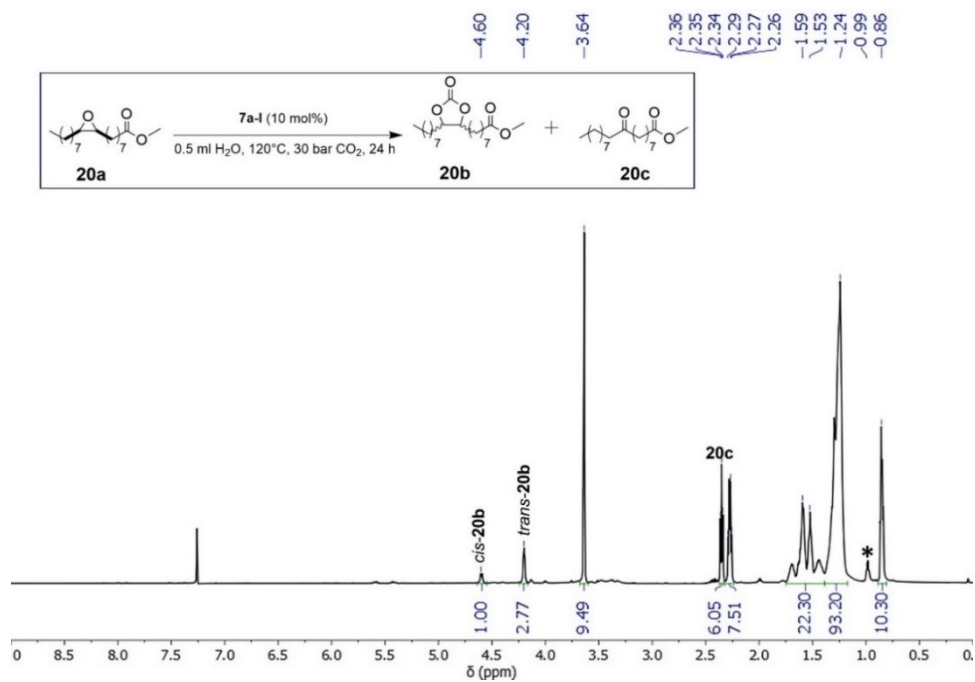

**Figure S126.**  $^1\text{H}$  NMR ( $\text{CDCl}_3$ ) spectrum of crude  $\text{CO}_2$  cycloaddition reaction to **20a**; **20a** (1.5 mmol), 10 mol% **7a-I** (\*), 0.5 mL  $\text{H}_2\text{O}$ , 120 °C, 30 bar  $\text{CO}_2$ , 24 h; Table 5, Entry 6.

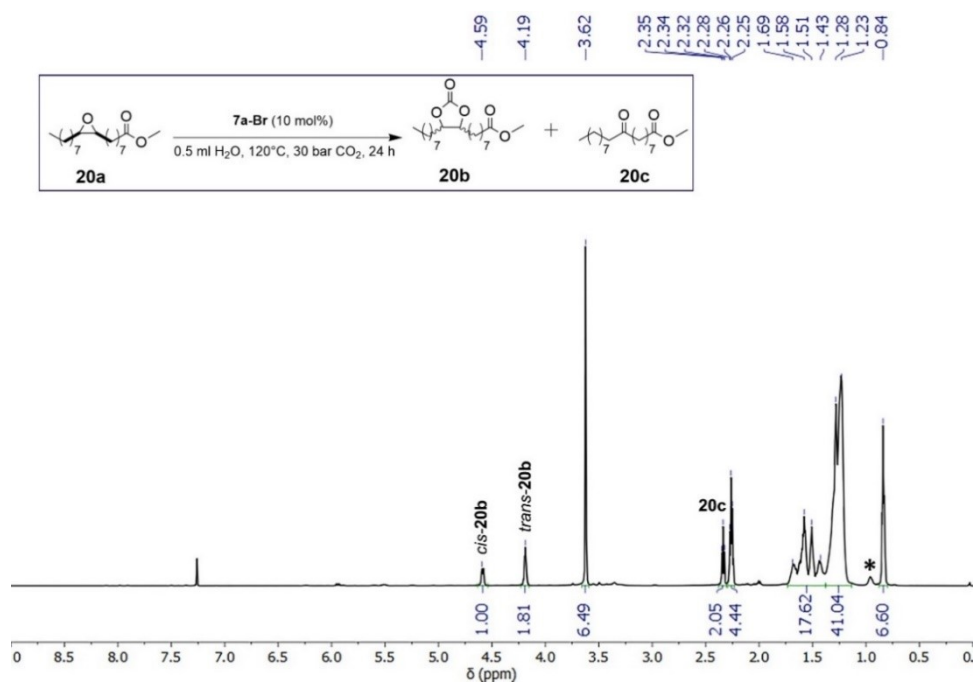

**Figure S127.**  $^1\text{H}$  NMR ( $\text{CDCl}_3$ ) spectrum of crude  $\text{CO}_2$  cycloaddition reaction to **20a**; **20a** (1.5 mmol), 10 mol% **7a-Br** (\*), 0.5 mL  $\text{H}_2\text{O}$ , 120 °C, 30 bar  $\text{CO}_2$ , 24 h; Table 5, Entry 7.

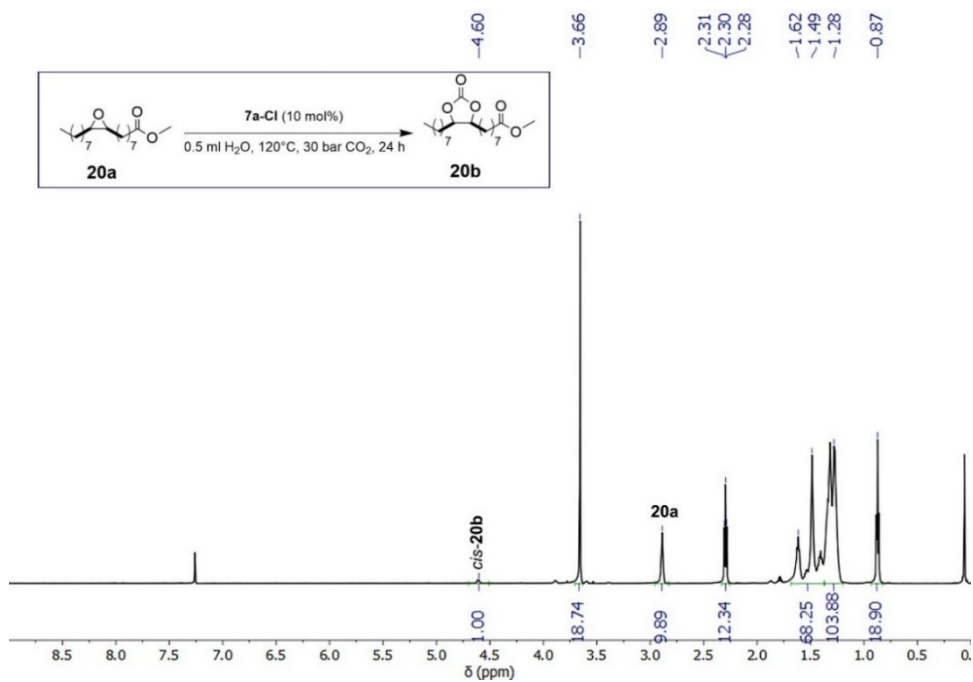

**Figure S128.** <sup>1</sup>H NMR (CDCl<sub>3</sub>) spectrum of crude CO<sub>2</sub> cycloaddition reaction to **20a**; **20a** (1.5 mmol), 10 mol% **7a-Cl**, 0.5 mL H<sub>2</sub>O, 120 °C, 30 bar CO<sub>2</sub>, 24 h; Table 5, Entry 8.

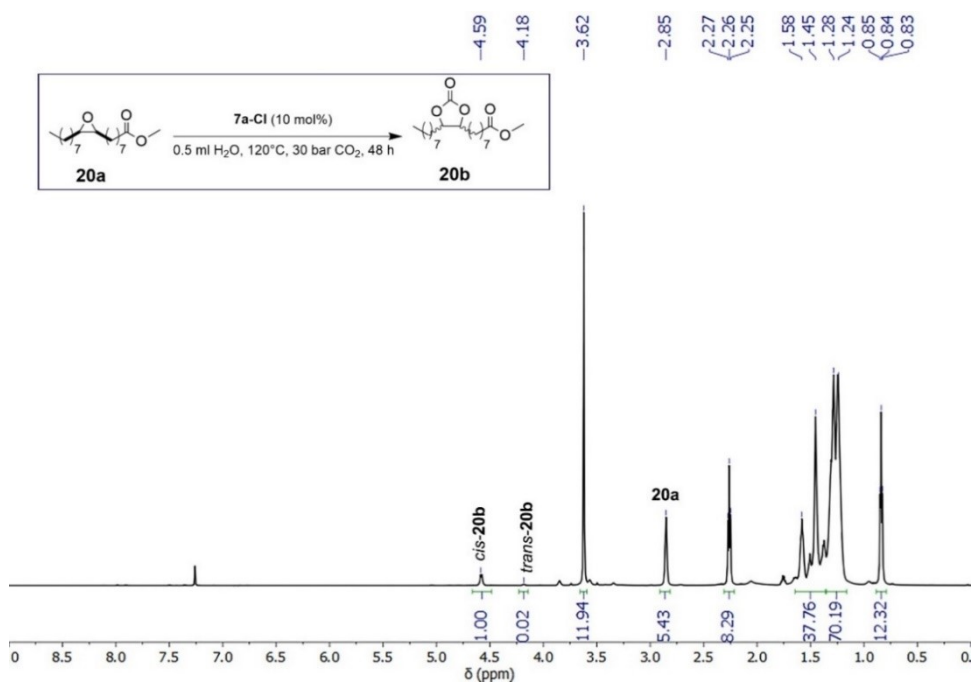

**Figure S129.** <sup>1</sup>H NMR (CDCl<sub>3</sub>) spectrum of crude CO<sub>2</sub> cycloaddition reaction to **16a**; **16a** (1.5 mmol), 10 mol% **7a-Cl**, 0.5 mL H<sub>2</sub>O, 120 °C, 30 bar CO<sub>2</sub>, 48 h; Table 5, Entry 9.

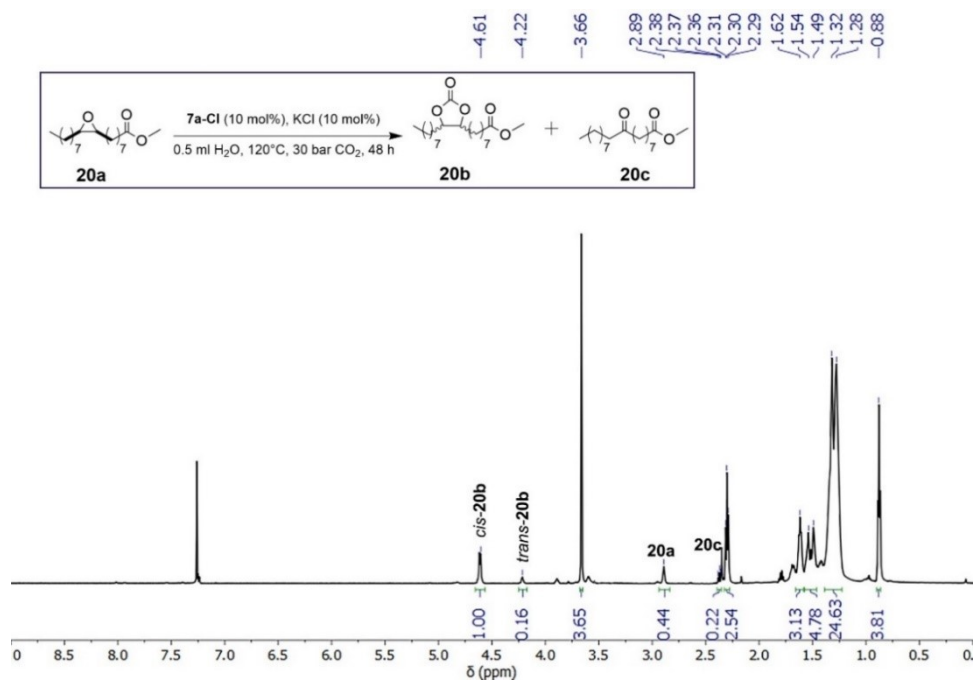

**Figure S130.** <sup>1</sup>H NMR (CDCl<sub>3</sub>) spectrum of crude CO<sub>2</sub> cycloaddition reaction to **20a**; **20a** (1.5 mmol),

10 mol% **7a-Cl**, 10 mol% **KCl**, 0.5 mL H<sub>2</sub>O, 120 °C, 30 bar CO<sub>2</sub>, 48 h; Table 5, Entry 10.

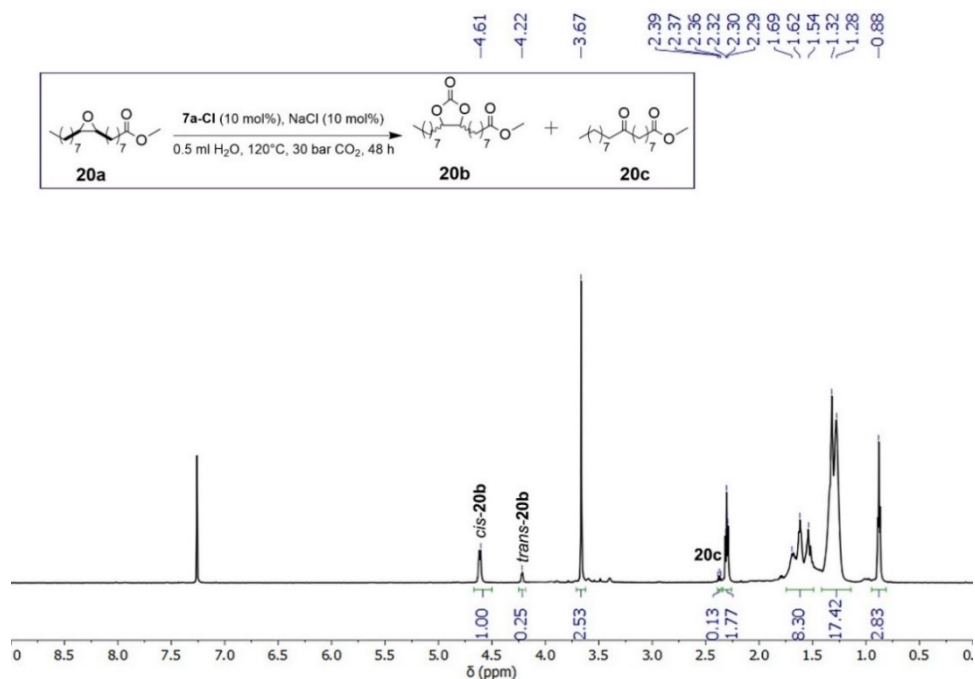

**Figure S131.** <sup>1</sup>H NMR (CDCl<sub>3</sub>) spectrum of crude CO<sub>2</sub> cycloaddition reaction to **20a**; **20a** (1.5 mmol),

10 mol% **7a-Cl**, 10 mol% **NaCl**, 0.5 mL H<sub>2</sub>O, 120 °C, 30 bar CO<sub>2</sub>, 48 h; Table 5, Entry 11.

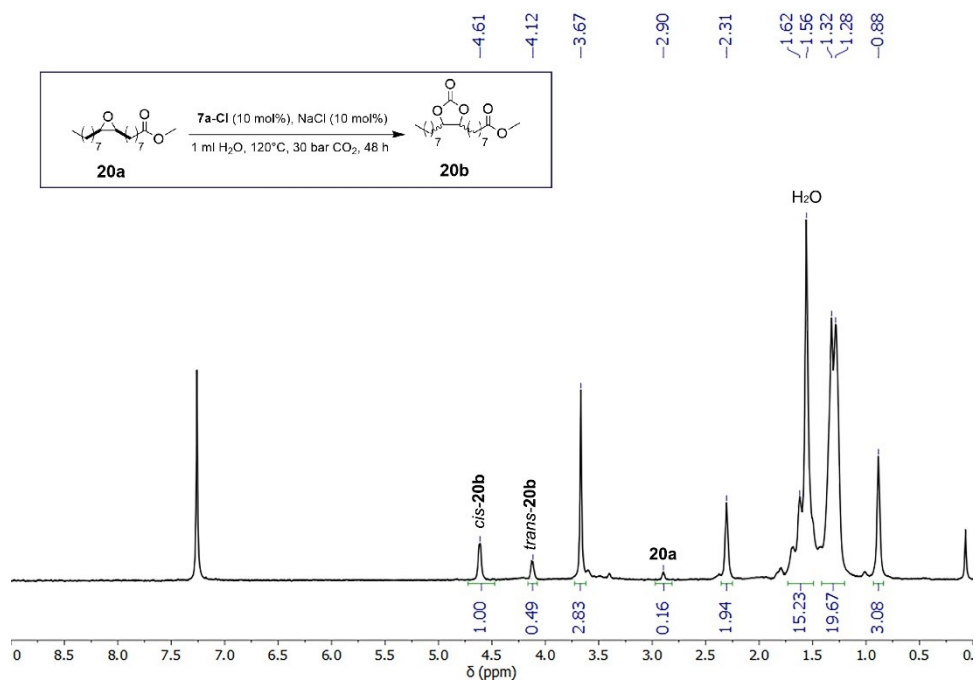

**Figure S132.** <sup>1</sup>H NMR (CDCl<sub>3</sub>) spectrum of crude CO<sub>2</sub> cycloaddition reaction to **20a**; **20a** (1.5 mmol),

10 mol% **7a-Cl**, 10 mol% NaCl, 1 mL H<sub>2</sub>O, 120 °C, 30 bar CO<sub>2</sub>, 48 h; Table 5, Entry 12.

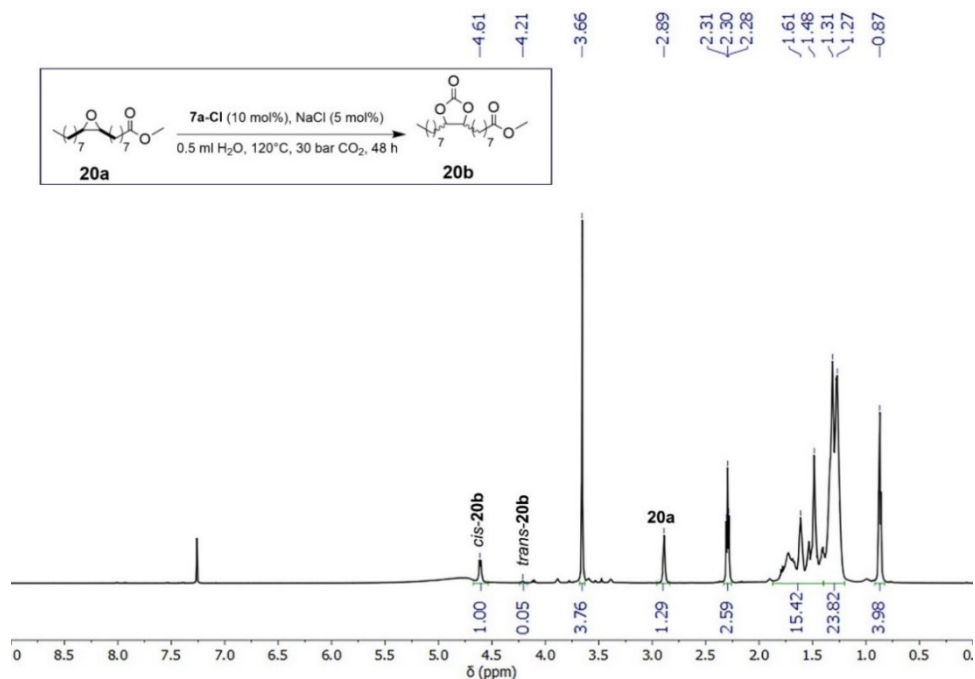

**Figure S133.** <sup>1</sup>H NMR (CDCl<sub>3</sub>) spectrum of crude CO<sub>2</sub> cycloaddition reaction to **20a**; **20a** (1.5 mmol),

10 mol% **7a-Cl**, 5 mol% NaCl, 0.5 mL H<sub>2</sub>O, 120 °C, 30 bar CO<sub>2</sub>, 48 h; Table 5, Entry 14.

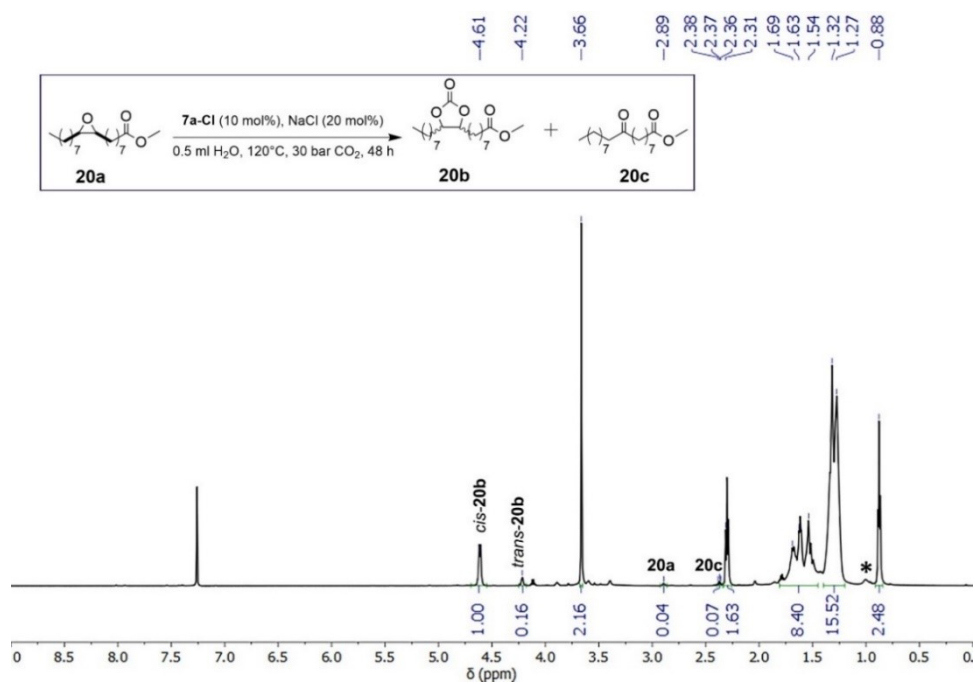

**Figure S134.** <sup>1</sup>H NMR (CDCl<sub>3</sub>) spectrum of crude CO<sub>2</sub> cycloaddition reaction to **20a**; **20a** (1.5 mmol),

10 mol% **7a-Cl** (\*), 20 mol% NaCl, 0.5 mL H<sub>2</sub>O, 120 °C, 30 bar CO<sub>2</sub>, 48 h; Table 5, Entry 15.

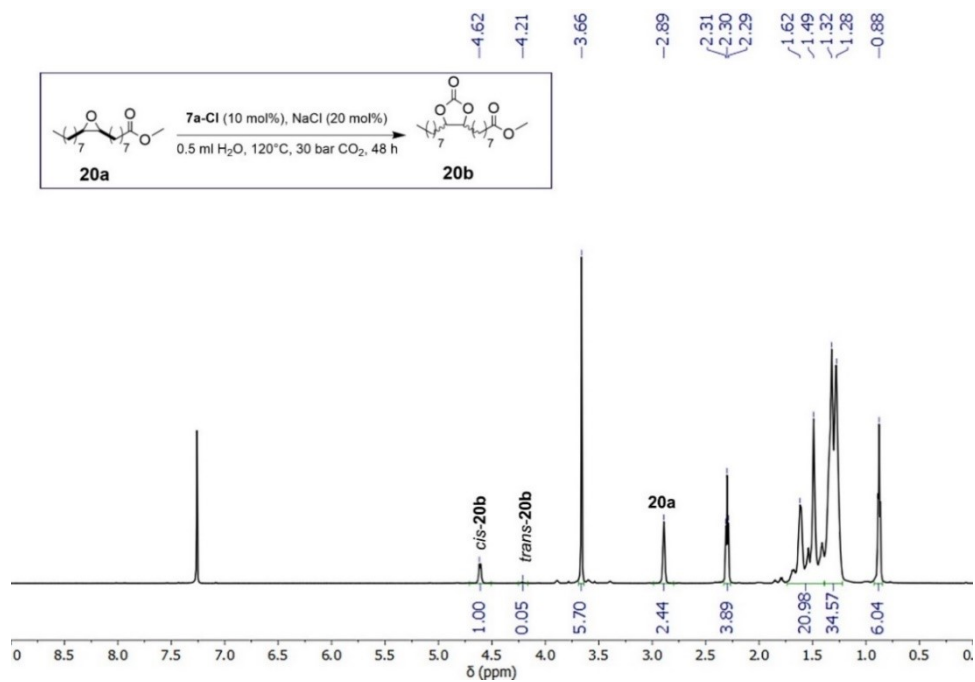

**Figure S135.** <sup>1</sup>H NMR (CDCl<sub>3</sub>) spectrum of crude CO<sub>2</sub> cycloaddition reaction to **20a**; **20a** (1.5 mmol),

10 mol% **7a-Cl**, 20 mol% NaCl, 0.5 mL H<sub>2</sub>O, 120 °C, 30 bar CO<sub>2</sub>, 48 h (2<sup>nd</sup> run); Table 5, Entry 16.

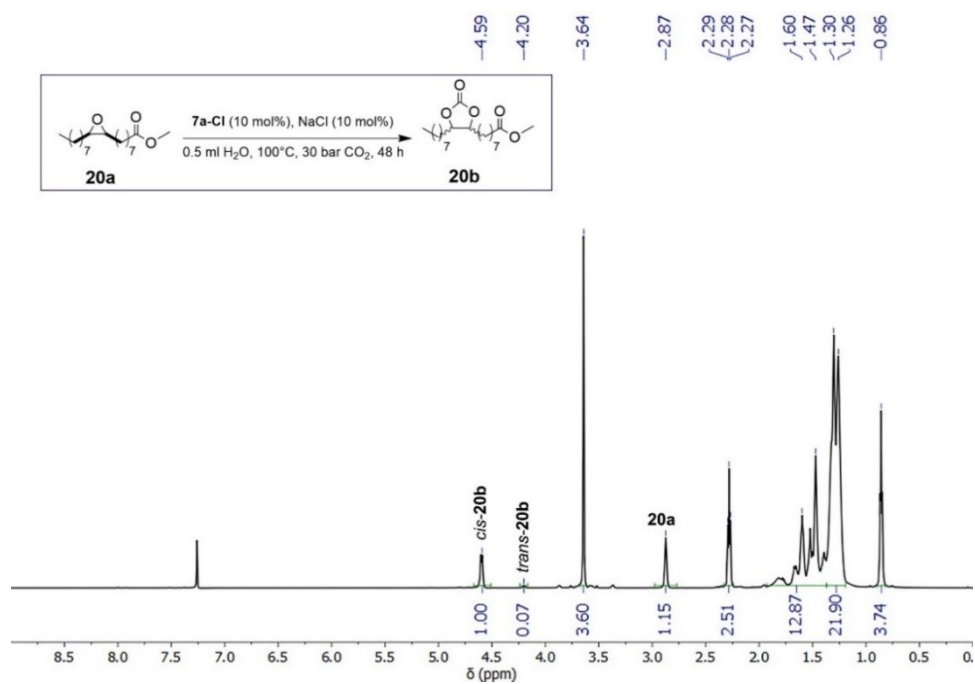

**Figure S136.** <sup>1</sup>H NMR (CDCl<sub>3</sub>) spectrum of crude CO<sub>2</sub> cycloaddition reaction to **20a**; **20a** (1.5 mmol),

10 mol% **7a-Cl**, 10 mol% **NaCl**, 0.5 mL H<sub>2</sub>O, 100 °C, 30 bar CO<sub>2</sub>, 48 h; Table 5, Entry 17.

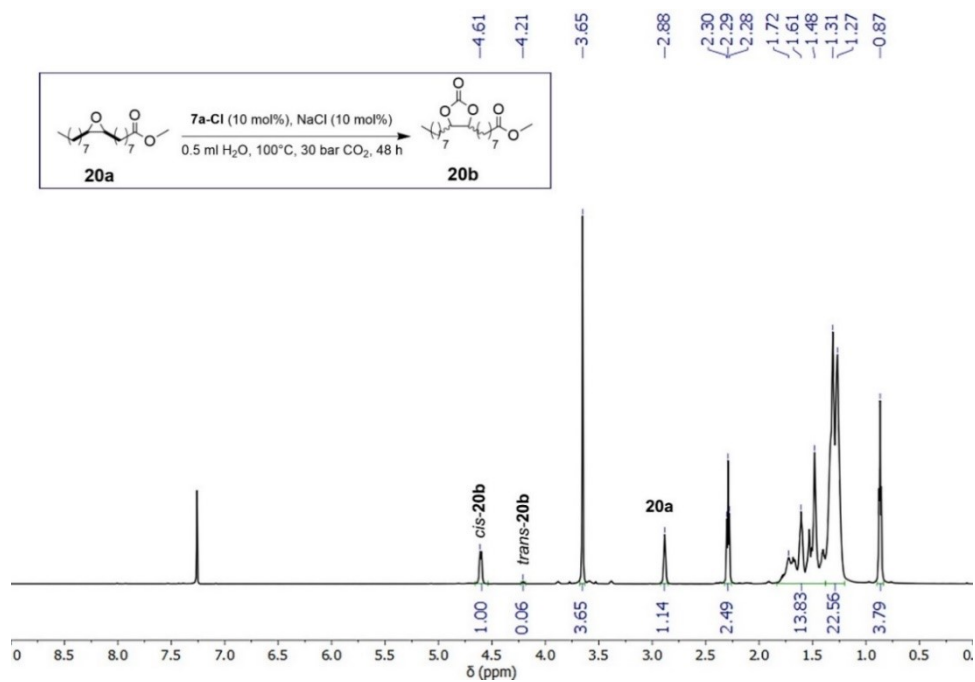

**Figure S137.** <sup>1</sup>H NMR (CDCl<sub>3</sub>) spectrum of crude CO<sub>2</sub> cycloaddition reaction to **20a**; **20a** (1.5 mmol),

10 mol% **7a-Cl**, 10 mol% **NaCl**, 0.5 mL H<sub>2</sub>O, 100 °C, 30 bar CO<sub>2</sub>, 48 h (2<sup>nd</sup> run); Table 5, Entry 18.



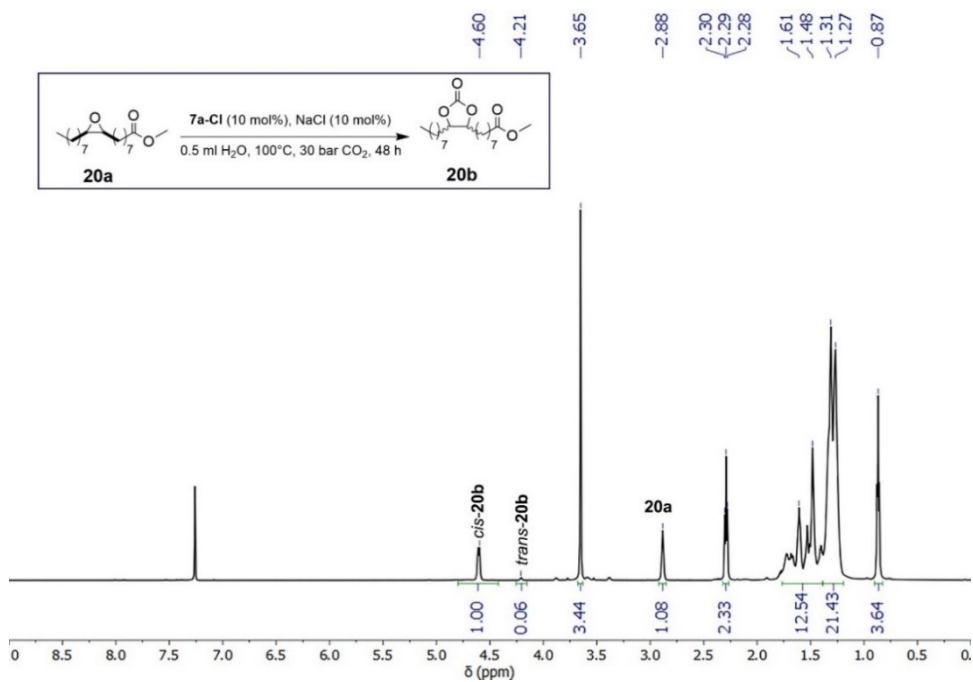

**Figure S138.** <sup>1</sup>H NMR (CDCl<sub>3</sub>) spectrum of crude CO<sub>2</sub> cycloaddition reaction to **20a**; **20a** (1.5 mmol),

10 mol% **7a-Cl**, 10 mol% **NaCl**, 0.5 mL H<sub>2</sub>O, 100 °C, 30 bar CO<sub>2</sub>, 48 h (3<sup>rd</sup> run); Table 5, Entry 19.

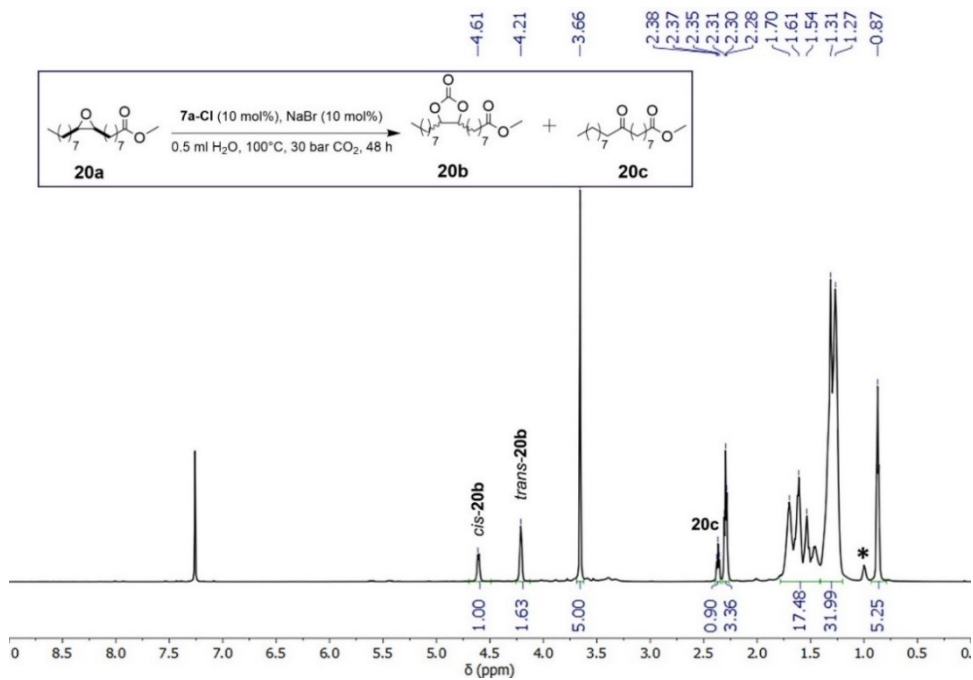

**Figure S139.** <sup>1</sup>H NMR (CDCl<sub>3</sub>) spectrum of crude CO<sub>2</sub> cycloaddition reaction to **20a**; **20a** (1.5 mmol),

10 mol% **7a-Cl** (\*), 10 mol% **NaBr**, 0.5 mL H<sub>2</sub>O, 100 °C, 30 bar CO<sub>2</sub>, 48 h; Table 5, Entry 20.

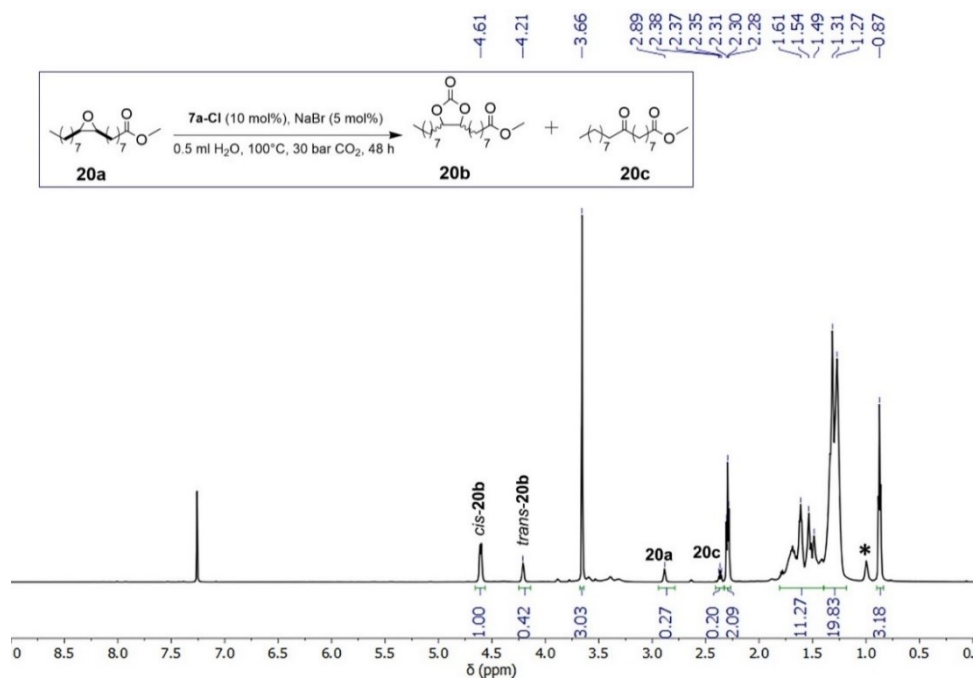

**Figure S140.** <sup>1</sup>H NMR (CDCl<sub>3</sub>) spectrum of crude CO<sub>2</sub> cycloaddition reaction to **20a**; **20a** (1.5 mmol), 10 mol% **7a-Cl** (\*), 5 mol% NaBr, 0.5 mL H<sub>2</sub>O, 100 °C, 30 bar CO<sub>2</sub>, 48 h (1<sup>st</sup> run); Table 5, Entry 21.

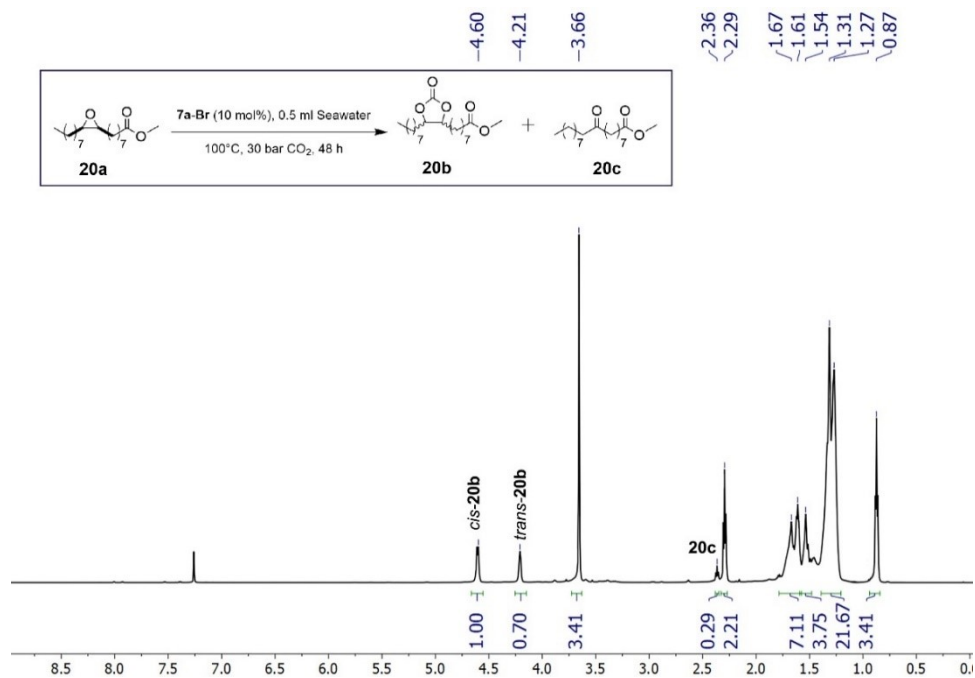

**Figure S141.** <sup>1</sup>H NMR (CDCl<sub>3</sub>) spectrum of crude CO<sub>2</sub> cycloaddition reaction to **20a**; **20a** (1.5 mmol), 10 mol% **7a-Br**, 0.5 mL seawater, 100 °C, 30 bar CO<sub>2</sub>, 48 h ; Table 5, Entry 22. The NMR spectrum of **20b** matches the literature reference *Asian J. Org. Chem.* 2020, 9, 801-810.

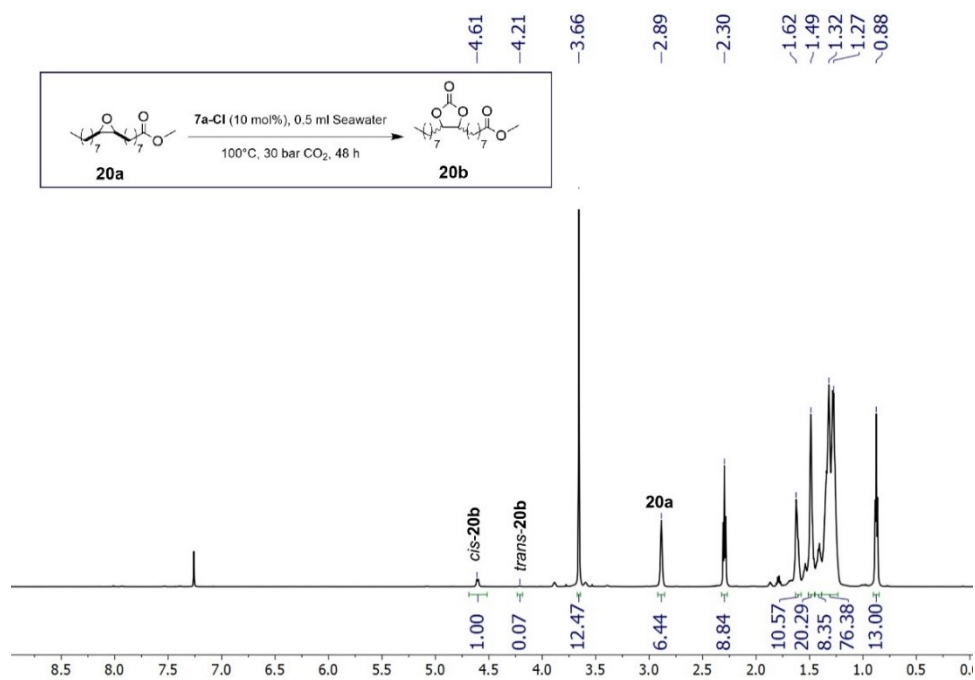

**Figure S142.** <sup>1</sup>H NMR (CDCl<sub>3</sub>) spectrum of crude CO<sub>2</sub> cycloaddition reaction to **20a**; **20a** (1.5 mmol), 10 mol% **7a-Cl** (\*), 0.5 mL seawater, 100 °C, 30 bar CO<sub>2</sub>, 48 h ; Table 5, Entry 23.

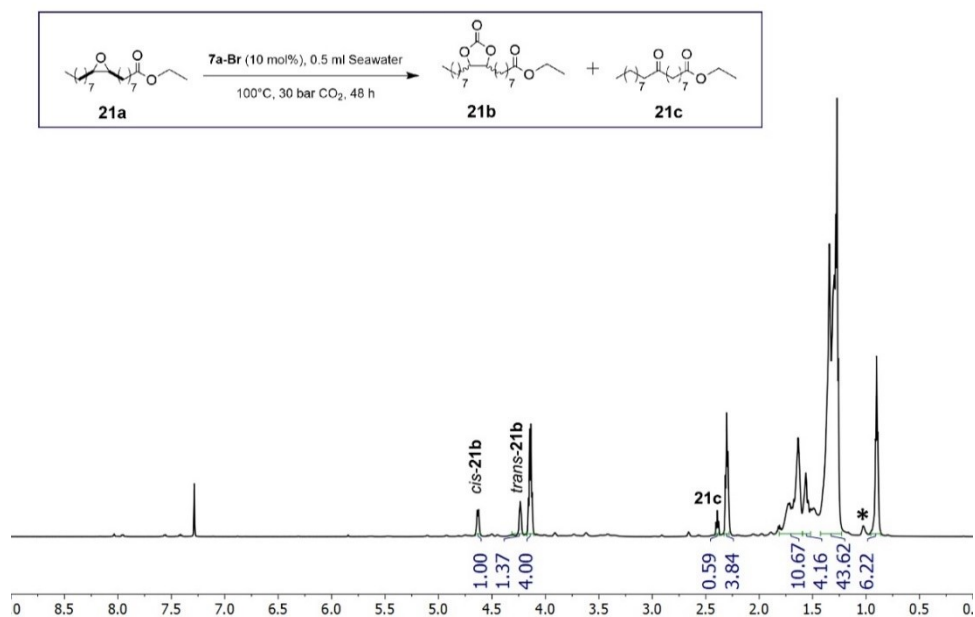

**Figure S143.** <sup>1</sup>H NMR (CDCl<sub>3</sub>) spectrum of crude CO<sub>2</sub> cycloaddition reaction to **21a**; **21a** (1.5 mmol), 10 mol% **7a-Br**, 0.5 mL seawater, 100 °C, 30 bar CO<sub>2</sub>, 48 h; Table S7 Entry 2.

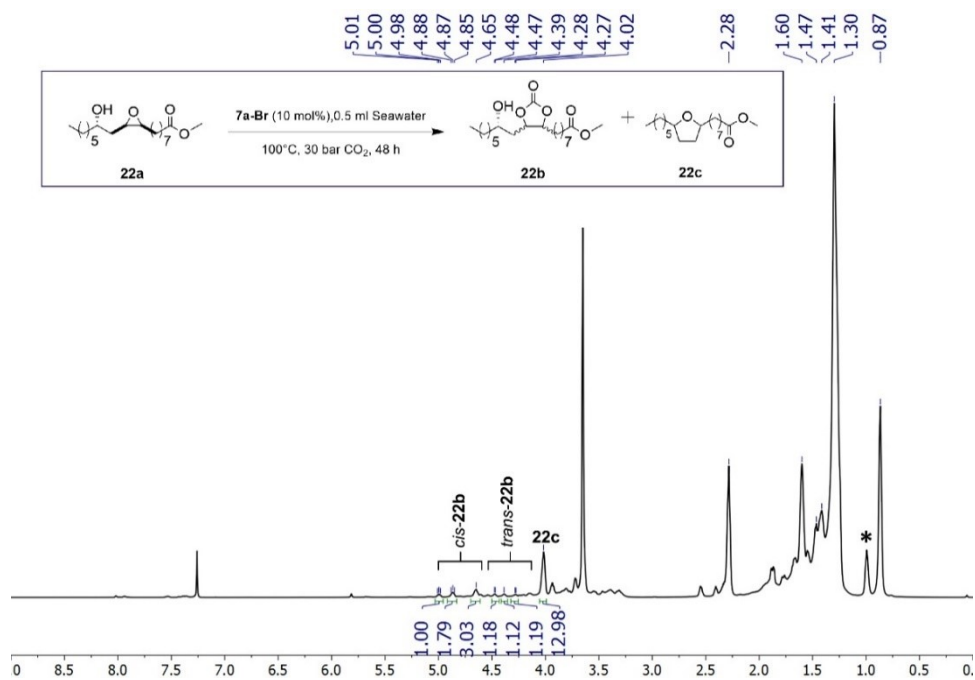

**Figure S144.** <sup>1</sup>H NMR (CDCl<sub>3</sub>) spectrum of crude CO<sub>2</sub> cycloaddition reaction to **22a**; **22a** (1.5 mmol), 10 mol% **7a-Br** (\*), 0.5 mL seawater, 100 °C, 30 bar CO<sub>2</sub>, 48 h; Table S7 Entry 3.

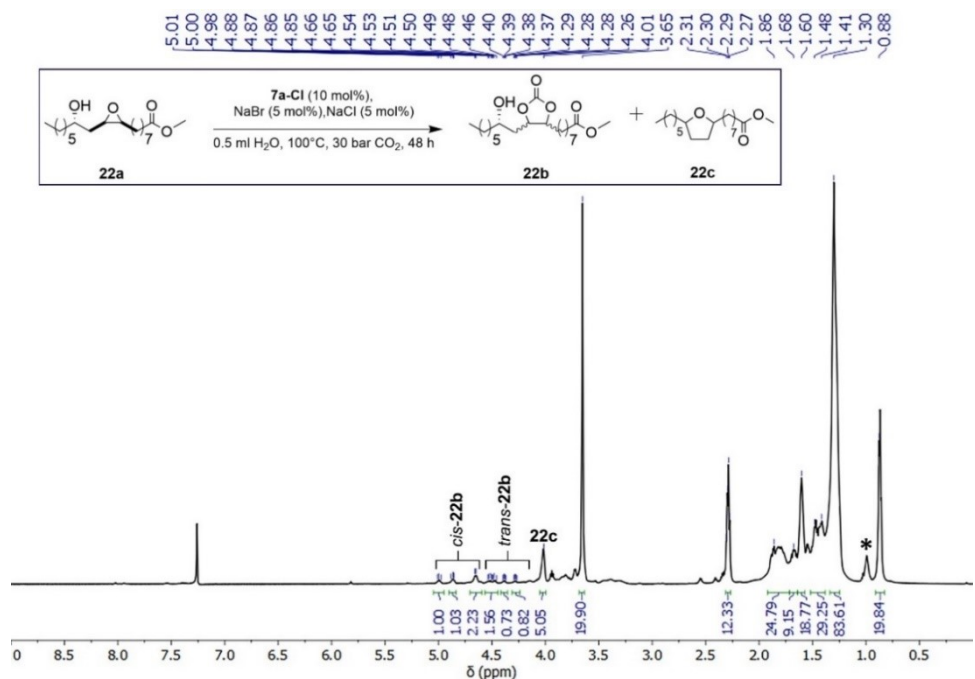

**Figure S145.** <sup>1</sup>H NMR (CDCl<sub>3</sub>) spectrum of crude CO<sub>2</sub> cycloaddition reaction to **22a**; **22a** (1.5 mmol), 10 mol% **7a-Cl** (\*), 5 mol% NaBr, 5 mol% NaCl, 0.5 mL H<sub>2</sub>O, 100 °C, 30 bar CO<sub>2</sub>, 48 h; Table S7 Entry 3.

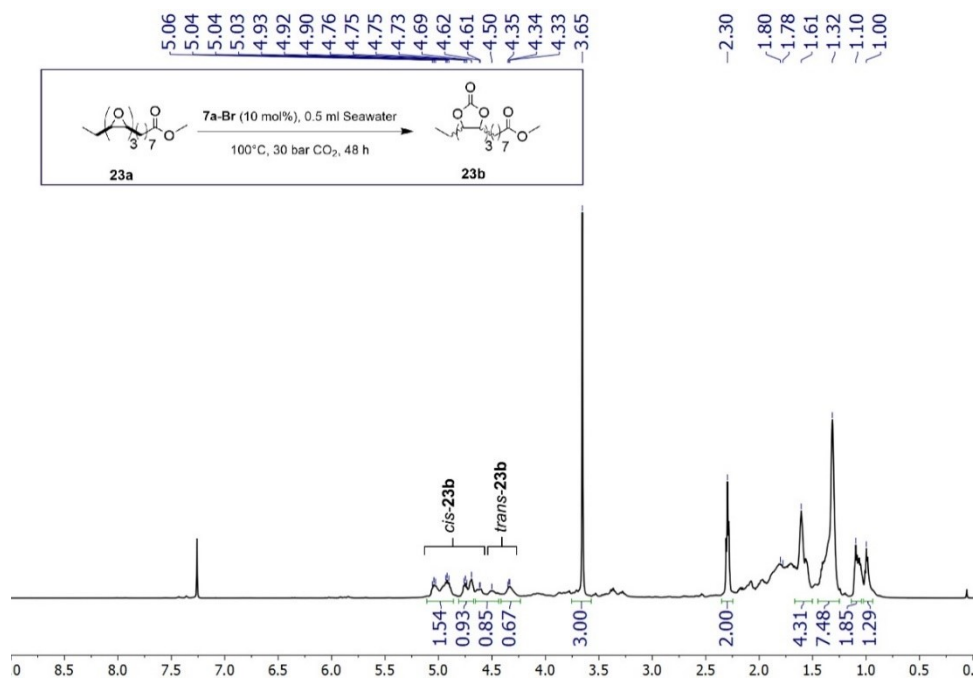

**Figure S146.**  $^1\text{H}$  NMR ( $\text{CDCl}_3$ ) spectrum of crude  $\text{CO}_2$  cycloaddition reaction to **23a**; **23a** (1.5 mmol), 10 mol% **7a-Br**, 0.5 mL seawater, 100 °C, 30 bar  $\text{CO}_2$ , 48 h; Table S7 Entry 4.

## S8. Supplementary Catalytic Results

Several experiments were conducted to investigate the salting in or salting out the behavior of salt additives at different concentrations (Table S3). When using just 1 mol% KI, the conversion of **11a** was basically identical as in the absence of KI but the selectivity for **11b** decreased (Table S3, entries 1, 2), indicating that, at this concentration, KI played a salting-in role similar to  $\text{LiClO}_4$ . Conversely, 2 mol% KI was sufficient to obtain the same enhancement of catalytic performance as when using 4 mol% KI achieving the carbonate product in high selectivity (Table S3, entries 3, 4). As **7b-I** was found to display moderate **11a** conversions to **11b** even when used in low catalytic loadings (0.5 mol%, Table S5), we also tested the effect of the addition of salts (KI, KOAc, 2 mol%) for this reduced **7b-I** loading (Table S3, entries 5-7); in the case of KI, the **11a** conversion even slightly decreased compared to the reaction carried out in the absence of salt indicating that, for this catalyst concentration, KI behaved as a salting-in additive such as NaI and  $\text{LiClO}_4$  (Table 3). In the case of KOAc, instead, the conversion of **11a** increased significantly to about 80% with high **11b** selectivity confirming the positive effect of this salting-out additive even for low **7b-I** loadings.

**Table S3.** Effect of salt addition on the cycloaddition of CO<sub>2</sub> to 1-hexene oxide (**11a**) catalyzed by **7b-I** in the aqueous biphasic environment.<sup>a</sup>

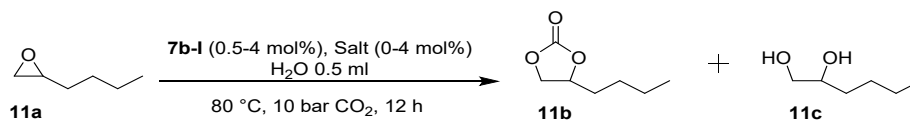

| Entry          | Catalyst (mol%)   | Salt (mol%)     | P <sub>CO2</sub> (bar) | Time (h) | Conversion <sup>b</sup> (%) | Selectivity <sup>c</sup> (%) |
|----------------|-------------------|-----------------|------------------------|----------|-----------------------------|------------------------------|
| 1 <sup>d</sup> | <b>7b-I</b> (4)   | -               | 10                     | 12       | 35±2                        | 94±3                         |
| 2              | <b>7b-I</b> (4)   | <b>KI</b> (1)   | 10                     | 12       | 34±2                        | 85±1                         |
| 3              | <b>7b-I</b> (4)   | <b>KI</b> (2)   | 10                     | 12       | 88±1                        | 97±1                         |
| 4 <sup>f</sup> | <b>7b-I</b> (4)   | <b>KI</b> (4)   | 10                     | 12       | 87±1                        | 98±1                         |
| 5              | <b>7b-I</b> (0.5) | -               | 10                     | 24       | 54±1                        | 99±1                         |
| 6              | <b>7b-I</b> (0.5) | <b>KI</b> (2)   | 10                     | 24       | 27±1                        | 90±1                         |
| 7              | <b>7b-I</b> (0.5) | <b>KOAc</b> (2) | 10                     | 24       | 79±1                        | 97±1                         |

<sup>a</sup> Reaction conditions: epoxide (10 mmol), **7b-I** (4 mol%), salt (0-4 mol%), H<sub>2</sub>O 0.5 mL, at 80 °C, 10 bar CO<sub>2</sub> for 12-24 h. <sup>b</sup> Determined by <sup>1</sup>H NMR. <sup>c</sup>Refers to the selectivity for cyclic carbonate (**11b**) versus the corresponding 1,2-diol (**11c**). <sup>d</sup> Taken from Table 2. <sup>f</sup> Taken from Table 3.

**Table S4** Effect of NaCl concentration on the cycloaddition of CO<sub>2</sub> with **11a** catalyzed by **7b-I**.<sup>a</sup>

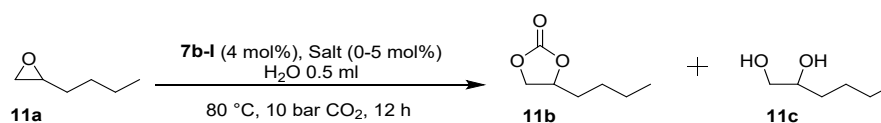

| Entry          | Catalyst (mol%) | Salt (mol%)        | Conversion <sup>b</sup> (%) | Selectivity <sup>c</sup> (%) |
|----------------|-----------------|--------------------|-----------------------------|------------------------------|
| 1 <sup>d</sup> | <b>7b-I</b> (4) | -                  | 35±2                        | 94±3                         |
| 2              | <b>7b-I</b> (4) | <b>NaCl</b> (1)    | 47±1                        | 94±1                         |
| 3              | <b>7b-I</b> (4) | <b>NaCl</b> (2)    | 65±1                        | 96±1                         |
| 4 <sup>e</sup> | <b>7b-I</b> (4) | <b>NaCl</b> (2.45) | 99±1                        | 99±1                         |
| 5              | <b>7b-I</b> (4) | <b>NaCl</b> (2.5)  | 96±1                        | 99±1                         |
| 6 <sup>f</sup> | <b>7b-I</b> (4) | <b>NaCl</b> (4)    | 77±1                        | 97±1                         |
| 7              | <b>7b-I</b> (4) | <b>NaCl</b> (5)    | 66±1                        | 97±1                         |

<sup>a</sup> Reaction conditions: epoxide (10 mmol), **7b-I** (4 mol%), salt (0-4 mol%), H<sub>2</sub>O 0.5 mL, at 80 °C, 10 bar CO<sub>2</sub> for 12 h. <sup>b</sup> Determined by <sup>1</sup>H NMR. <sup>c</sup>Refers to the selectivity for cyclic carbonate (**11b**) versus the corresponding 1,2-diol (**11c**). <sup>d</sup> Taken from Table 2. <sup>e</sup> Using 0.5 mL seawater (2.45 mol% NaCl) instead of DI water. <sup>f</sup> Taken from Table 3.

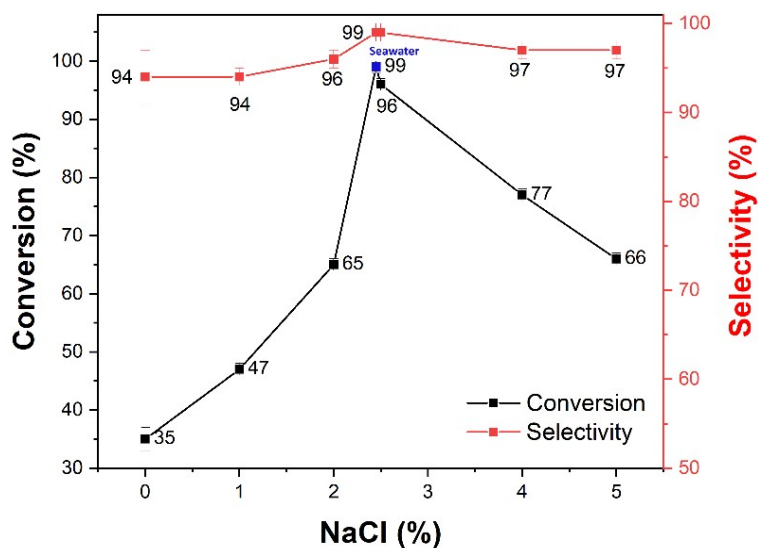

**Figure S147.** The effect of NaCl concentration to the biphasic catalytic system

**Table S5.** Effect of catalyst amount on the cycloaddition of CO<sub>2</sub> to 1-hexene oxide (**11a**) catalyzed by **7b-I** in an aqueous biphasic environment.<sup>a</sup>

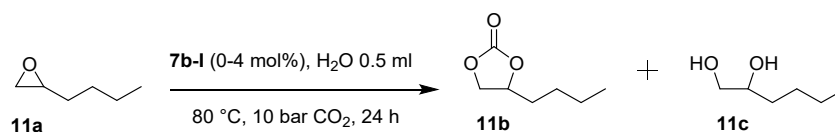

| Entry          | Catalyst (mol%)    | Conversion <sup>b</sup> (%) | Selectivity <sup>c</sup> (%) | TON |
|----------------|--------------------|-----------------------------|------------------------------|-----|
| 1 <sup>d</sup> | -                  | 4±1                         | 0                            | 0   |
| 2              | <b>7b-I</b> (0.25) | 39±1                        | 99±1                         | 156 |
| 3              | <b>7b-I</b> (0.5)  | 54±1                        | 99±1                         | 108 |
| 4              | <b>7b-I</b> (1)    | 95±1                        | 97±1                         | 95  |
| 5              | <b>7b-I</b> (2)    | 99±1                        | 99±1                         | 50  |
| 6 <sup>d</sup> | <b>7b-I</b> (4)    | 99±1                        | 99±1                         | 25  |

<sup>a</sup> Reaction conditions: epoxide (10 mmol), **7b-I** (0-4 mol%), H<sub>2</sub>O 0.5 mL, at 80 °C, 10 bar CO<sub>2</sub> for 24 h. <sup>b</sup> Determined by <sup>1</sup>H NMR. <sup>c</sup>Refers to the selectivity for cyclic carbonate (**11b**) versus the corresponding 1,2-diol (**11c**). <sup>d</sup> Taken from Table 2.

**Table S6** Cycloaddition of CO<sub>2</sub> with internal epoxide catalyzed by **7a-Cl**<sup>a</sup> and **7a-Br**<sup>b</sup>.

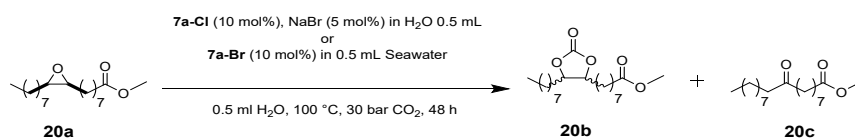

| Entry | Catalyst (mol%)                                     | Additive (mol %) | Conversion <sup>c</sup> (%) | Selectivity <sup>c</sup> (%) | cis/trans <sup>c</sup> (%) |
|-------|-----------------------------------------------------|------------------|-----------------------------|------------------------------|----------------------------|
| 1     | -                                                   | NaCl(10)         | 0                           | 0                            | -                          |
| 2     | -                                                   | NaBr(10)         | 0                           | 0                            | -                          |
| 3     | <b>7a-Cl</b> (10)_(1 <sup>st</sup> run)             | NaBr(5)          | 86±1                        | 88±1                         | 70/30                      |
| 4     | <b>7a-Cl</b> (10)_(2 <sup>nd</sup> run)             | -                | 77±1                        | 90±1                         | 70/30                      |
| 5     | <b>7a-Cl</b> (10)_(3 <sup>rd</sup> run)             | -                | 69±1                        | 92±1                         | 80/20                      |
| 6     | <b>7a-Cl</b> (10)_(4 <sup>th</sup> run)             | -                | 62±1                        | 93±1                         | 85/15                      |
| 7     | <b>7a-Cl</b> (10)_(5 <sup>th</sup> run)             | -                | 55±1                        | 94±1                         | 89/11                      |
| 8     | <b>7a-Br</b> in seawater (10)_(1 <sup>st</sup> run) | -                | 99±1                        | 86±4                         | 35/65                      |
| 9     | <b>7a-Br</b> in seawater (10)_(2 <sup>nd</sup> run) | -                | 99±1                        | 84±1                         | 56/44                      |
| 10    | <b>7a-Br</b> in seawater (10)_(3 <sup>rd</sup> run) | -                | 99±1                        | 85±1                         | 59/41                      |
| 11    | <b>7a-Br</b> in seawater (10)_(4 <sup>th</sup> run) | -                | 90±1                        | 88±1                         | 59/41                      |
| 12    | <b>7a-Br</b> in seawater (10)_(5 <sup>th</sup> run) | -                | 89±1                        | 90±1                         | 66/33                      |

<sup>a</sup> Epoxide **20a** (1.5 mmol), **7a-Cl** (10 mol%), NaBr (5 mol%), T= 100 °C, 30 bar CO<sub>2</sub>, 48 h, 0.5 mL water. <sup>b</sup> Epoxide **20a** (1.5 mmol), **7a-Br** (10 mol%), T= 100 °C, 30 bar CO<sub>2</sub>, 48 h, 0.5 mL seawater. <sup>c</sup> Determined by <sup>1</sup>H NMR, see reference <sup>4</sup>.

**Table S7.** Cycloaddition of CO<sub>2</sub> to epoxidized fatty acids **20a-23a** catalysed by **7a-Br** under optimized biphasic reaction conditions.<sup>a</sup>

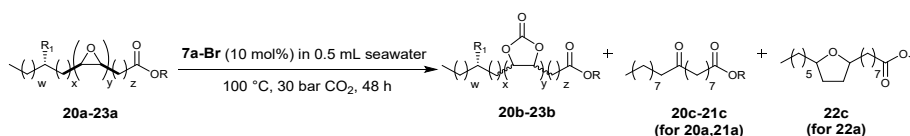

| Entry          | Substrate | Conversion (%) <sup>b</sup> | Selectivity (%) <sup>b</sup> | cis/trans (%) <sup>b</sup> |
|----------------|-----------|-----------------------------|------------------------------|----------------------------|
| 1 <sup>c</sup> |           | 99±1                        | 86±3 <sup>c</sup>            | 35/65                      |
| 2              |           | 99±1                        | 83±1                         | 45/55                      |
| 3              |           | 99±1                        | 47±1 (60±1) <sup>d</sup>     | 62/38 (58/42) <sup>d</sup> |
| 4              |           | 99±1                        | 99±1                         | 65/35                      |

<sup>a</sup> Epoxide (1.5 mmol), catalyst **7a-Br** (10 mol%), seawater 0.5 mL, for at 100 °C, 30 bar CO<sub>2</sub> for 48 h. <sup>b</sup> Determined by <sup>1</sup>H NMR, see reference<sup>4</sup>.

<sup>c</sup> Taken from Table 5. <sup>d</sup> Epoxide (1.5 mmol), catalyst **7a-Cl** (10 mol%), NaBr (5 mol%), NaCl (5 mol%), H<sub>2</sub>O 0.5 mL, at 100 °C, 30 bar CO<sub>2</sub> for 48 h.

For epoxidized ethyl oleate (**21a**), a similar result as for **20a** was observed, although with a slightly lower **21b** selectivity (Table S7, entries 1, 2). For **22a** (Table S7, entry 3), complete substrate conversion was observed but with moderate **22b** selectivity due to the formation of a cyclic ether by-product via intramolecular cycloaddition of the alcohol group to the epoxide.<sup>4,5</sup> The **22b** selectivity could be increased by using **7a-Cl** in the presence of NaBr and NaCl (5 mol% each) in the aqueous layer. For *cis*-epoxidized methyl linolenate (**23a**), a substrate with multiple epoxide functionalities, the triscarbonate **23b** was obtained with quantitative conversion and selectivity as the *cis*-isomer (Table S7, entry 4, Figure S146).



### S9. Control Experiments for the Reaction Phase

The following spectra refer to control experiments to check for the phase in which the catalytic reaction takes place (epoxide phase or aqueous phase); the experimental details for each run are given in the captions of the spectra.

Experiment 1: **11a** (10 mmol), 4 mol% **7b-I** were stirred at 80 °C for 30 min, then the hot organic phase was filtrated and reacted with CO<sub>2</sub> (10 bar) for 24 h (Figure S148).

Experiment 2: **11a** (10 mmol), 4 mol% **7b-I** and H<sub>2</sub>O (0.5 mL) stirred at 80 °C for 30 min, then the hot organic phase was filtrated and reacted with CO<sub>2</sub> (10 bar) for 24 h (Figure S149).

Experiment 3: **11a** (0.1 mmol) in D<sub>2</sub>O (0.5 mL) stirred at 80 °C for 24 h (Figure S150).

Experiment 4: **11a** (0.1 mmol), 4 mol% **7b-I**, and D<sub>2</sub>O (0.5 mL) stirred at 80 °C under 10 bar CO<sub>2</sub> for 24 h (Figure S151).

Experiment 5: **11a** (10 mmol), 4 mol% **7b-I**, 4 mol% KI, and D<sub>2</sub>O (0.5 mL) stirred at 80 °C for 30 min, then the hot organic phase was filtrated and reacted with CO<sub>2</sub> (10 bar) for 24 h (Figure S152).

Experiment 6: **11a** (10 mmol), 4 mol% **7b-I**, 4 mol% KOAc, and D<sub>2</sub>O (0.5 mL) stirred at 80 °C for 30 min, then the hot organic phase was filtrated and reacted with CO<sub>2</sub> (10 bar) for 24 h (Figure S153).

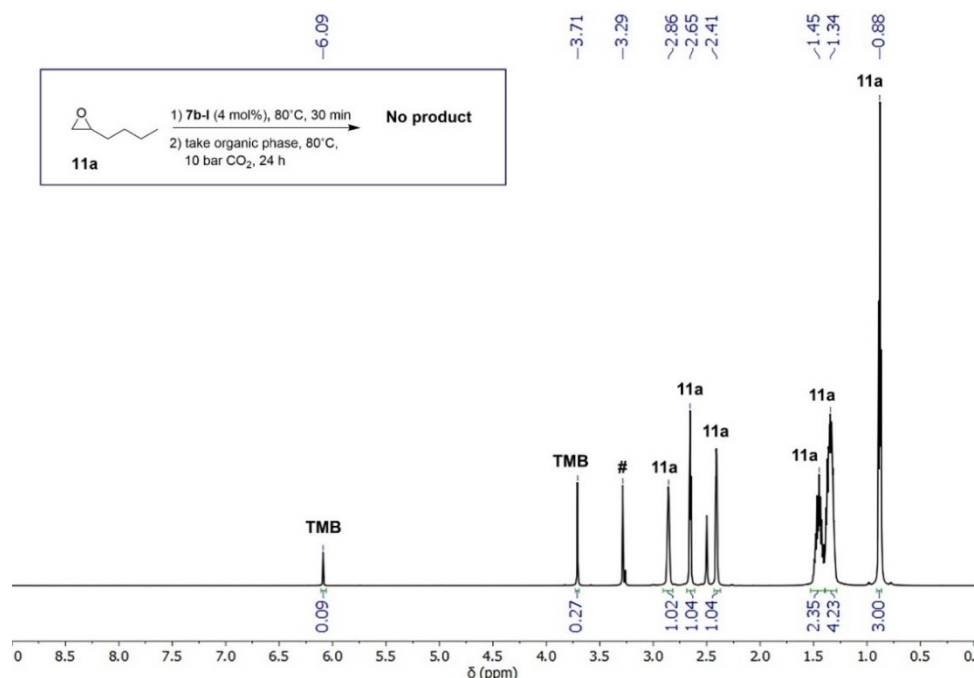

**Figure S148.** <sup>1</sup>H NMR (DMSO-d<sub>6</sub>) spectrum of experiment 1; 1,3,5 trimethoxy benzene (TMB) was added as internal standard; Table 6 Entry 1. (#) residual water signal in DMSO-d<sub>6</sub>.

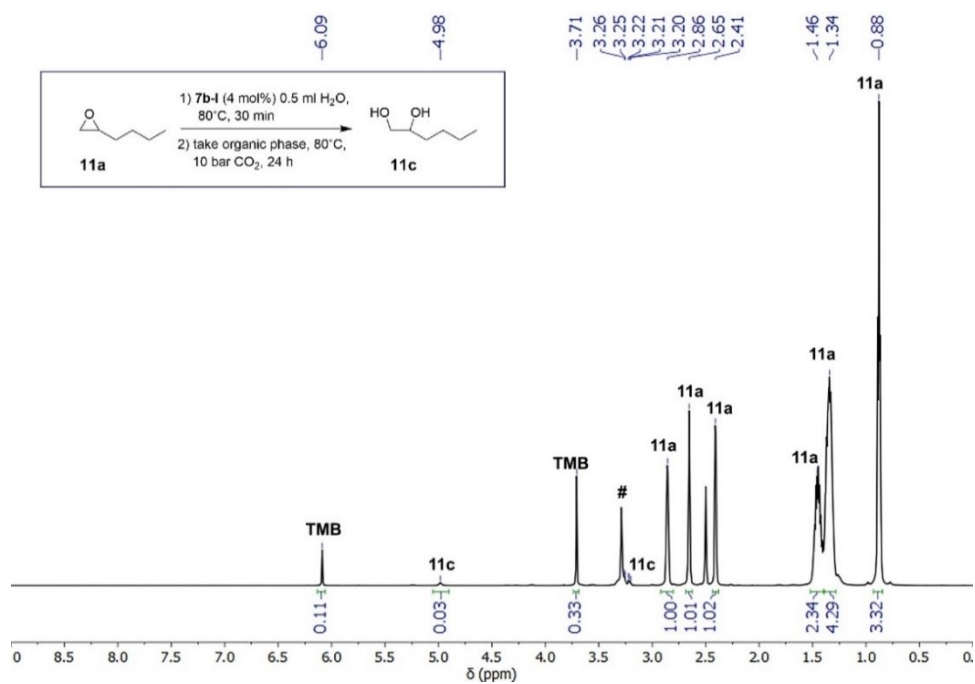

**Figure S149.** <sup>1</sup>H NMR (DMSO-d<sub>6</sub>) spectrum of experiments 2. 1,3,5 trimethoxy benzene (TMB) was added as internal standard; Table 6 Entry 2. (#) residual water signal in DMSO-d<sub>6</sub>.

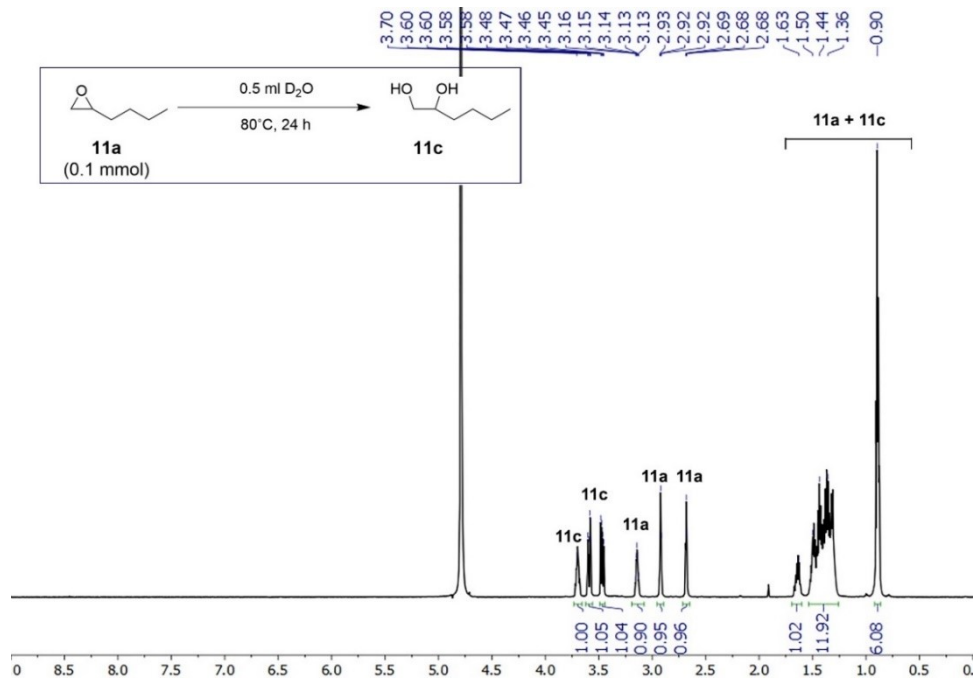

**Figure S150.** <sup>1</sup>H NMR (D<sub>2</sub>O) spectrum of experiment 3; Table 6 Entry 3.

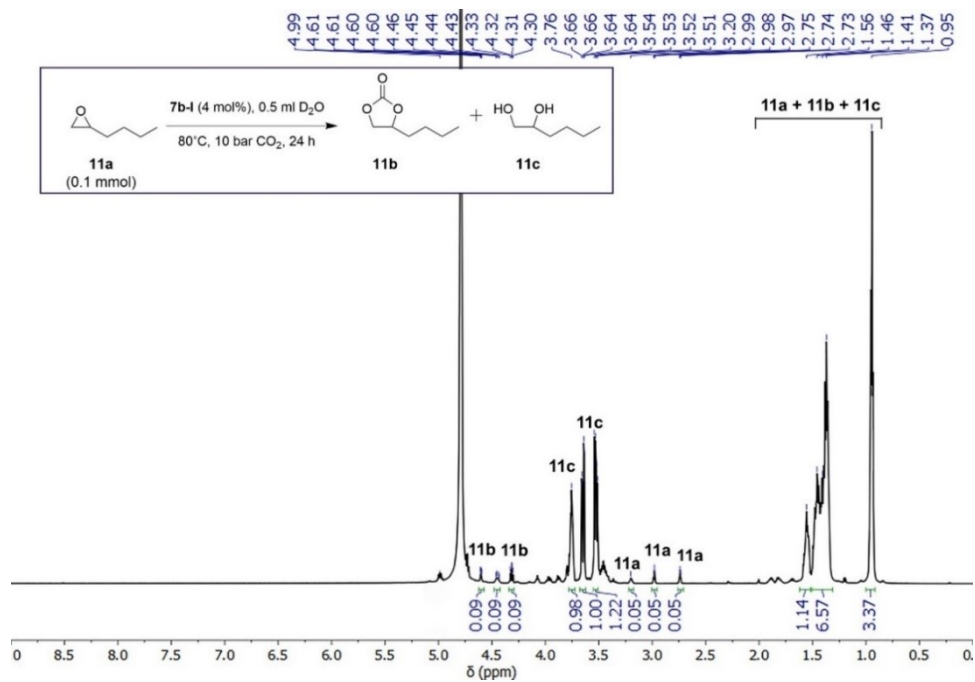

**Figure S151.**  $^1\text{H}$  NMR ( $\text{D}_2\text{O}$ ) spectrum of experiment 4.; Table 6 Entry 4.

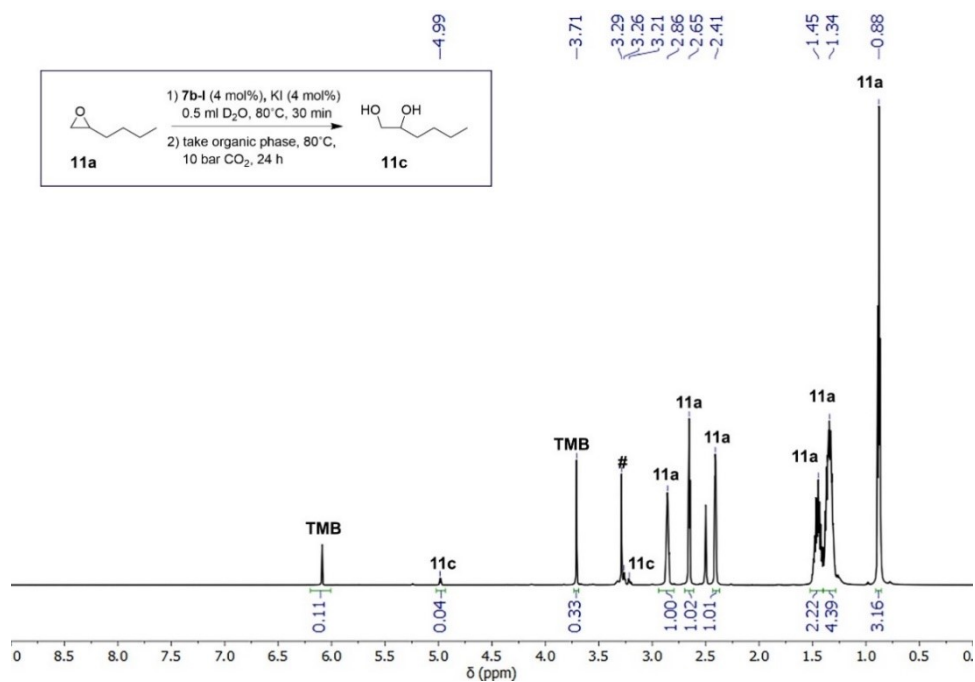

**Figure S152.**  $^1\text{H}$  NMR ( $\text{DMSO-d}_6$ ) spectrum of experiment 5; 1,3,5 trimethoxy benzene (TMB) was added as internal standard; Table 6 Entry 5. (#) residual water signal in  $\text{DMSO-d}_6$ .

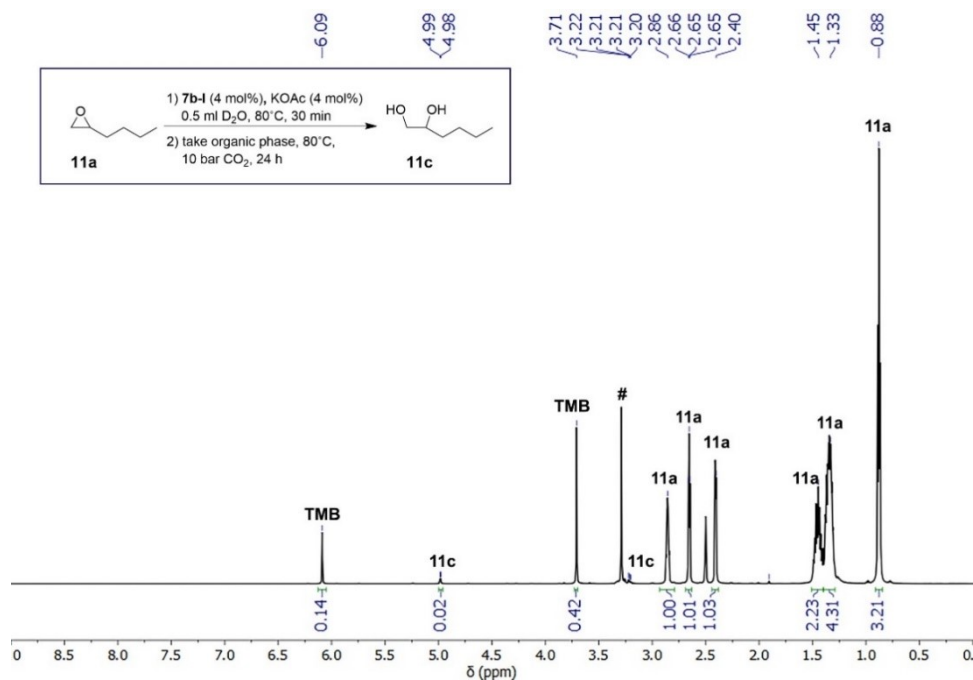

**Figure S153.**  $^1\text{H}$  NMR ( $\text{DMSO-d}_6$ ) spectrum of experiment 6; 1,3,5 trimethoxy benzene (TMB) was added as internal standard; Table 6 Entry 6. (#) residual water signal in  $\text{DMSO-d}_6$ .

### S10. Quantification of Catalyst Concentration in the Aqueous Phase

The variation of catalyst concentration in the aqueous layer after stirring with the epoxide (80 °C, 30 min) or after catalytic reaction (80 °C, 10 bar, 24 h without added salts, and 12 h in the presence of salts; for detailed description of experiments see Table S8) was quantified by  $^1\text{H}$  NMR spectroscopy using  $\text{D}_2\text{O}$  as the aqueous phase. In a general procedure, the aqueous phase after reaction (25  $\mu\text{L}$ ) and 1,3,5 trimethoxy benzene (~3 mg, internal standard) were added into an NMR tube. The catalyst concentration in the aqueous phase was calculated according to Equation (S2) from the  $^1\text{H}$  NMR spectrum (Figure S154) compared to the initial loading. The results are given in Figure S155 and Table S8.

Equation (S2);

$$\text{Concentration of catalyst in the aqueous phase (mol/L)} = \frac{I_a \times H_{\text{std}} \times N_{\text{std}} \times 106}{I_{\text{std}} \times H_a \times 25}$$

Where  $I_a$  is the integral of protons signal  $(\text{CH}_3)_3$  of **7b-I** at 1.35 ppm,  $I_{\text{std}}$  is the integral of protons signal  $(\text{CH}_3)_3$  of 1,3,5 trimethoxy benzene (TMB) at 6.10 ppm,  $H_a$  is the number of protons in **7b-I** ( $H_a=9$ ) at 1.35 ppm,  $H_{\text{std}}$  is the number of protons of TMB ( $H_{\text{std}}=3$ ) at 6.10 ppm,  $N_{\text{std}}$  is the number of moles of TMB.

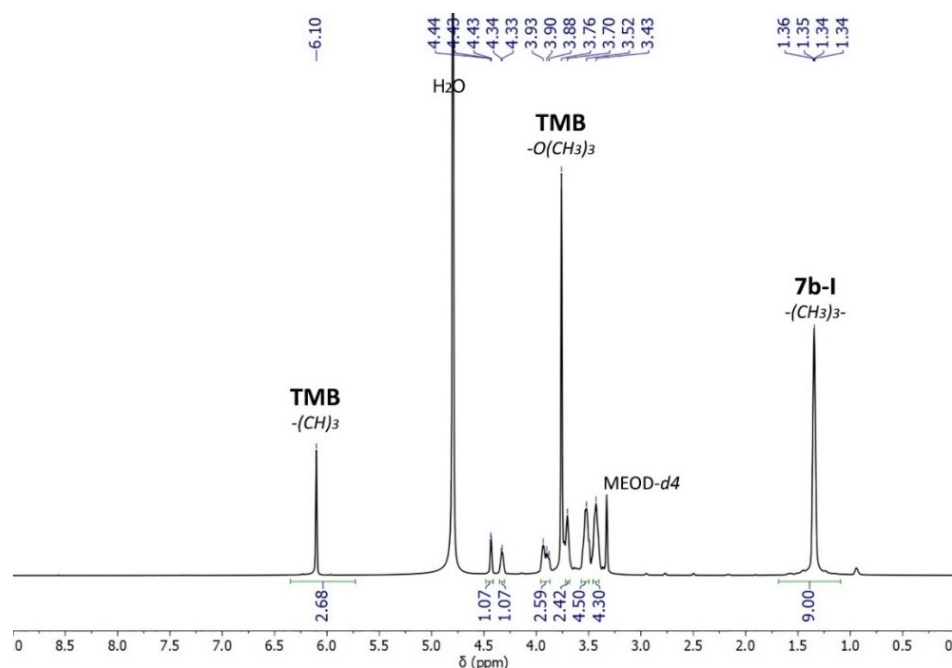

**Figure S154.** Representative  $^1\text{H}$  NMR spectrum of **7b-I** obtained by sampling the aqueous layer to determine  $[\mathbf{7b-I}]$  after the  $\text{CO}_2$  cycloaddition reaction at  $80\text{ }^\circ\text{C}$ , 10 bar  $\text{CO}_2$  for 24 h using 2.94 mg of 1,3,5 trimethoxy benzene (TMB) as an internal standard in  $\text{MeOD-d}_4$ .

**Table S8** Concentration of **7b-I** in aqueous, epoxide **11a**, and carbonate **11b** in different control experiments.

| Entry          | Catalyst (mol%)            | Cycle               | <b>7b-I</b> transfer to epoxide phase (no reaction) <sup>a</sup> |                                                     | <b>7b-I</b> transfer to carbonate phase (after reaction) <sup>b</sup> |                                                       |
|----------------|----------------------------|---------------------|------------------------------------------------------------------|-----------------------------------------------------|-----------------------------------------------------------------------|-------------------------------------------------------|
|                |                            |                     | $[\mathbf{7b-I}]$ (mol/L) <sup>c</sup>                           | $(\Delta[\mathbf{7b-I}])$ -epoxide (%) <sup>d</sup> | $[\mathbf{7b-I}]$ (mol/L) <sup>c</sup>                                | $(\Delta[\mathbf{7b-I}])$ -carbonate (%) <sup>e</sup> |
| 1              | <b>7b-I</b> (4)            | 1 <sup>st</sup> run | 0.80±0.01                                                        | 0                                                   | 0.77±0.01                                                             | 4.34±0.70                                             |
| 2              |                            | 2 <sup>nd</sup> run | -                                                                | -                                                   | 0.75±0.02                                                             | 7.54±0.06                                             |
| 3              |                            | 3 <sup>rd</sup> run | -                                                                | -                                                   | 0.70±0.02                                                             | 13.08±2.04                                            |
| 4 <sup>f</sup> | <b>7b-I</b> (4) + KOAc (4) |                     | 0.69±0.01                                                        | 14.20±0.38                                          | 0.69±0.01                                                             | 15.02±0.33                                            |
| 5 <sup>f</sup> | <b>7b-I</b> (4) + KF (4)   |                     | 0.78±0.01                                                        | 2.16±0.52                                           | 0.73±0.01                                                             | 9.03±0.64                                             |
| 6 <sup>f</sup> | <b>7b-I</b> (4) + KCl (4)  |                     | 0.77±0.01                                                        | 3.24±0.50                                           | 0.74±0.01                                                             | 7.41±0.99                                             |
| 7 <sup>f</sup> | <b>7b-I</b> (4) + KI (4)   |                     | 0.79±0.01                                                        | 1.61±0.78                                           | 0.76±0.01                                                             | 5.24±0.70                                             |
| 8 <sup>g</sup> | <b>7b-I</b> in seawater    |                     | 0.80±0.01                                                        | 0                                                   | 0.78±0.01                                                             | 2.34±1.00                                             |

<sup>a</sup>Reaction mixture of **11a** (10 mmol), **7b-I** (0.4 mmol,  $[\mathbf{7b-I}]_0 = 0.8\text{ M}$ ) in 0.5 mL  $\text{D}_2\text{O}$  heated at  $80\text{ }^\circ\text{C}$  for 30 minutes followed by a sampling of the aqueous layer to determine  $[\mathbf{7b-I}]$ ; the same reaction mixture was used for the  $\text{CO}_2$  cycloaddition reaction under the conditions in footnote b, recovered and reused two times. <sup>b</sup>Reaction conditions at  $80\text{ }^\circ\text{C}$ , 10 bar  $\text{CO}_2$  for 24 h in the absence of salts, 12 h in the presence of salt followed by a sampling of the aqueous layer to determine  $[\mathbf{7b-I}]$ . <sup>c</sup> Residual **7b-I** concentration in the aqueous phase as determined by  $^1\text{H}$  NMR (see section S10) using 1,3,5 trimethoxy benzene as an internal standard in  $\text{MeOD-d}_4$ . <sup>d</sup> Percent loss of **7b-I** to the epoxide phase calculated as  $100 \cdot ([\mathbf{7b-I}]_0 - [\mathbf{7b-I}]) / [\mathbf{7b-I}]_0$ . <sup>e</sup> Percent loss of **7b-I** to the final reaction product calculated as  $100 \cdot ([\mathbf{7b-I}]_0 - [\mathbf{7b-I}]) / [\mathbf{7b-I}]_0$ . <sup>f</sup> Reaction mixture of **11a** (10 mmol), **7b-I** (0.4 mmol,  $[\mathbf{7b-I}]_0 = 0.8\text{ M}$ ) in 0.5 mL  $\text{D}_2\text{O}$  containing 0.4 mmol salt heated at  $80\text{ }^\circ\text{C}$  for 30 minutes. <sup>g</sup> Reaction mixture of **11a** (10 mmol), **7b-I** (0.4 mmol,  $[\mathbf{7b-I}]_0 = 0.8\text{ M}$ ) in 0.5 mL Seawater heated at  $80\text{ }^\circ\text{C}$  for 30 minutes followed by a sampling of the aqueous layer to determine  $[\mathbf{7b-I}]$ ; the same reaction mixture was used for the  $\text{CO}_2$  cycloaddition reaction under the conditions in footnote b.

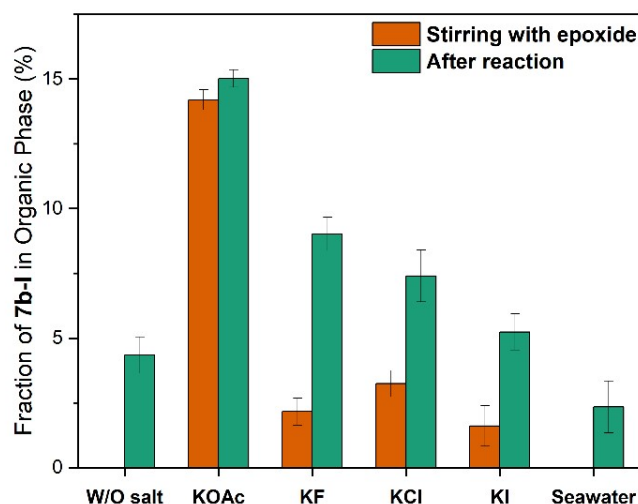

**Figure S155.** Fraction of **7b-I** in the organic phase after stirring with epoxide (80 °C, 30 min) or after catalytic reaction (80 °C, 10 bar, 12-24 h) as calculated from the variation of concentration in the aqueous layer.

### S11. Substrate and Product Concentration Profile in the Aqueous Phase

The concentration of cyclic carbonate and diol in the aqueous layer after the biphasic cycloaddition reaction was quantified by <sup>1</sup>H NMR spectroscopy. In a general procedure, the aqueous phase after reaction (50 μL), 1,3,5 trimethyl benzene (1 uL, internal standard), and 450 uL DMSO-d<sub>6</sub> were added into an NMR tube. The concentration of epoxide, carbonate, and diol in the aqueous phase was calculated according to Equation (S3) from the <sup>1</sup>H NMR spectrum (Figure S156) compared to the initial loading. The results are given in Table S9.

Equation (S3);

$$\text{Concentration of epoxide/carbonate/diol in the aqueous phase (mol/L)} = \frac{I_X \times H_{\text{std}} \times N_{\text{std}} \times 106}{I_{\text{std}} \times H_X \times 50}$$

Where  $I_X$  is the integral value of the protons signal of the epoxide, carbonate, or diol,  $I_{\text{std}}$  is the integral value of protons signal (CH)<sub>3</sub> of 1,3,5 trimethyl benzene at 6.75 ppm,  $H_a$  is the number of protons of epoxide, carbonate, or diol,  $H_{\text{std}}$  is number of protons of 1,3,5 trimethyl benzene ( $H_{\text{std}}=3$ ) at 6.75 ppm,  $N_{\text{std}}$  is the number of moles of 1,3,5 trimethyl benzene.

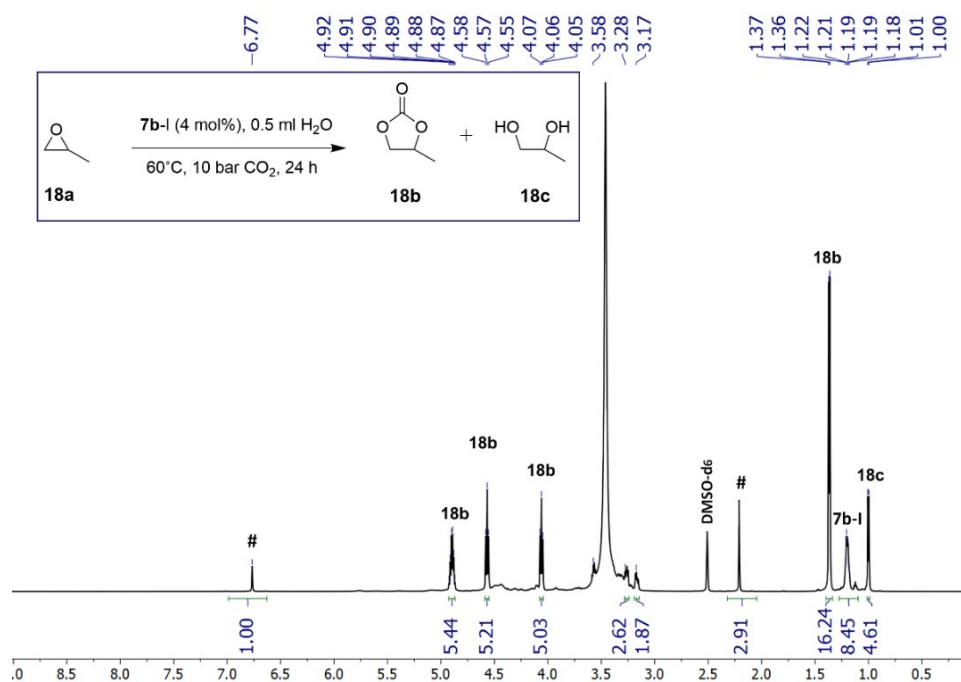

**Figure S156.** Representative  $^1\text{H}$  NMR spectrum of the aqueous layer of crude  $\text{CO}_2$  cycloaddition reaction to **18a**; **18a** (10 mmol), 4 mol% **7b-I**, 0.5 mL  $\text{H}_2\text{O}$ , 60 °C, 10 bar  $\text{CO}_2$ , 24 h by using 1  $\mu\text{L}$  of 1,3,5 trimethyl benzene (#) as an internal standard in  $\text{DMSO-d}_6$ ; Table 4, Entry 10.

**Table S9** Concentration of cyclic carbonate and diol in aqueous layer after the biphasic reaction.<sup>a</sup>

| Entry                | Epoxide<br>(10 mmol) | Conv.<br>(%) | [Carbonate] <sub>aq</sub> |                     | [Diol] <sub>aq</sub> |                     | Selectivity <sup>e</sup><br>(%) |
|----------------------|----------------------|--------------|---------------------------|---------------------|----------------------|---------------------|---------------------------------|
|                      |                      |              | (mmol) <sup>b</sup>       | (mol%) <sup>c</sup> | (mmol) <sup>b</sup>  | (mol%) <sup>d</sup> |                                 |
| <b>1</b>             | <b>11a</b>           | 99±1         | 0.17±0.05                 | 1.69±0.50           | ND <sup>f</sup>      | -                   | 99±1                            |
| <b>2</b>             | <b>14a</b>           | 99±1         | 0.20±0.01                 | 1.95±0.05           | ND <sup>f</sup>      | -                   | 99±1                            |
| <b>3<sup>g</sup></b> | <b>16a</b>           | 99±1         | 0.32±0.02                 | 3.17±0.03           | 0.22±0.01            | 2.20±0.12           | 98±1                            |
| <b>4</b>             | <b>18a</b>           | 99±1         | 1.28±0.15                 | 12.76±1.53          | 0.42±0.12            | 4.15±1.18           | 96±1                            |
| <b>5<sup>h</sup></b> | <b>18a</b>           | 99±1         | 0.77±0.03                 | 7.71±0.27           | 0.36±0.02            | 3.57±0.20           | 96±1                            |

<sup>a</sup> Reaction conditions: Epoxide (10 mmol), catalyst **7b-I** (4 mol%),  $\text{H}_2\text{O}$  0.5 mL, at 60-80 °C, 10 bar  $\text{CO}_2$  for 24 h followed by a sampling of the aqueous layer to determine [Carbonate] and [Diol]. <sup>b</sup> Residual [Carbonate] and [Diol] concentration in the aqueous phase as determined by  $^1\text{H}$  NMR using 1,3,5 trimethyl benzene as an internal standard in  $\text{DMSO-d}_6$ . <sup>c</sup> Percent loss of carbonate to the aqueous phase calculated as  $100 \cdot ([\text{Carbonate}]_{\text{aq}})/[\text{Epoxide}]_0$ . <sup>d</sup> Percent loss of Diol to the aqueous phase calculated as  $100 \cdot ([\text{Diol}]_{\text{aq}})/[\text{Epoxide}]_0$ . <sup>e</sup> The selectivity for cyclic carbonates versus 1,2-diols was calculated as  $100 \cdot ([\text{Epoxide}]_0 - [\text{Diol}]_{\text{aq}})/[\text{Epoxide}]_0$ . <sup>f</sup> ND: Not detected by  $^1\text{H}$ -NMR measurement. <sup>g</sup> Using catalyst **7b-I** (2 mol%) <sup>h</sup> Using 4 mol% NaCl as an additive.

## S12. Calculation of the isolated yield of cyclic carbonate product

The organic phase was isolated and weighed on an analytical balance after completing the biphasic reaction, as shown in Table S10. Equation (S4) was used to calculate the percentage of isolation yield based on the initial concentration of epoxide substrate and weight of isolated cyclic carbonate.

Equation (S4);

$$\text{Isolated yield of cyclic carbonate (\%)} = \frac{g_p}{MW_p \times \text{mol}_s} \times 100$$

Where  $g_p$  is the weight of the isolated cyclic carbonate product,  $MW_p$  is the molecular weight of the cyclic carbonate product, and  $\text{mol}_s$  is the initial mole of the epoxide substrate.

**Table S10** Isolated yield of cyclic carbonate product from the cycloaddition of CO<sub>2</sub> to terminal epoxides catalysed by **7b-I** under biphasic reaction conditions.<sup>a</sup>

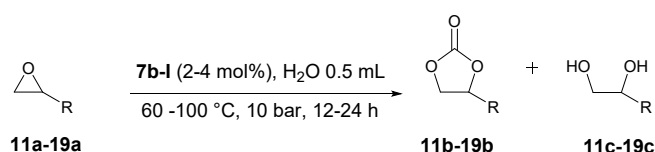

| Entry | Substrate | Catalyst (mol%)             | Temp. (°C) | Isolated Yield (g)         | (%) <sup>b</sup> |
|-------|-----------|-----------------------------|------------|----------------------------|------------------|
| 1     | 11a       | <b>7b-I</b> (4)             | 80         | 1.312±0.020 <sup>e</sup>   | 90±1             |
| 2     | 11a       | <b>7b-I</b> (4)             | 80         | 7.010±0.025 <sup>c,d</sup> | 97±1             |
| 3     | 11a       | <b>7b-I</b> (2)             | 80         | 1.376±0.010 <sup>e</sup>   | 95±1             |
| 4     | 12a       | <b>7b-I</b> (4)             | 60         | 1.051±0.008 <sup>e</sup>   | 90±1             |
| 5     | 13a       | <b>7b-I</b> (4)             | 80         | 1.811±0.059 <sup>e</sup>   | 88±3             |
| 6     | 13a       | <b>7b-I</b> (2)             | 80         | 1.822±0.074 <sup>e</sup>   | 87±3             |
| 7     | 14a       | <b>7b-I</b> (4)             | 80         | 1.793±0.042 <sup>e</sup>   | 91±2             |
| 8     | 15a       | <b>7b-I</b> (4)             | 100        | 2.043±0.016 <sup>e</sup>   | 90±1             |
| 9     | 16a       | <b>7b-I</b> (2)             | 80         | 1.684±0.013 <sup>e</sup>   | 90±1             |
| 10    | 17a       | <b>7b-I</b> (4)             | 80         | 1.842±0.004 <sup>e</sup>   | 95±1             |
| 11    | 19a       | <b>7b-I</b> (4)             | 60         | 1.129±0.013 <sup>e</sup>   | 94±1             |
| 12    | 10a       | <b>7b-I</b> in seawater (4) | 60         | 1.485±0.012 <sup>c,f</sup> | 91±1             |
| 13    | 18a       | <b>7b-I</b> (4)             | 60         | 0.817±0.029 <sup>e</sup>   | 80±3             |
| 14    | 18a       | <b>7b-I</b> +NaCl (4)       | 60         | 0.873±0.007 <sup>e</sup>   | 86±1             |
| 15    | 18a       | <b>7b-I</b> in seawater (4) | 60         | 0.884±0.006 <sup>e</sup>   | 87±1             |

<sup>a</sup> Reaction conditions: Epoxide (10 mmol), Catalyst **7b-I** (4 mol%), 0.5 mL H<sub>2</sub>O, 10 bar CO<sub>2</sub> for 24 h. <sup>b</sup> Calculated according to Equation (S4). <sup>c</sup> Isolated from phase separation. <sup>d</sup> Results for an experiment carried out in a larger scale: Epoxide (50 mmol), **7b-I** (4 mol%), H<sub>2</sub>O (2.5 mL) at 80 °C, 10 bar for 24 h. <sup>e</sup> Due to the solid nature of the product it formed as a precipitate that was filtrated and dried under vacuum. <sup>f</sup> Reaction conditions: Epoxide (10 mmol), Catalyst **7b-I** (4 mol%), Seawater 0.5 mL H<sub>2</sub>O, 10 bar CO<sub>2</sub> for 12 h.



### S13. Determination of Chloride Ion Concentration in Seawater by Titration (Mohr's Method)

The seawater sample was prepared according to the reported procedure. In this study, 20 mL seawater sample was diluted to 100 mL in a volumetric flask. Then 10 mL aliquot of diluted seawater was pipetted into a conical flask and added about 50 mL of distilled water, and 1 mL of  $K_2CrO_4$  ( $C= 0.25$  mol/L) was used as an indicator. The solution was titrated with  $AgNO_3$  solution ( $C= 0.1$  mol/L).

**Table S11.** Titration of seawater Mohr's method.

| Entry          | Volume of seawater (mL) | Volume of $AgNO_3$ (mL) |
|----------------|-------------------------|-------------------------|
| 1              | 10                      | 9.8                     |
| 2              | 10                      | 9.8                     |
| 3              | 10                      | 9.8                     |
| <b>Average</b> |                         | <b>9.8</b>              |

#### Calculation:

Calculate the moles of reacted  $AgNO_3 = 9.8\text{mL} \times \frac{0.1\text{mol}}{1\text{L}} \times \frac{1\text{L}}{1000\text{mL}}$

$$= 0.00098 \text{ mol}$$

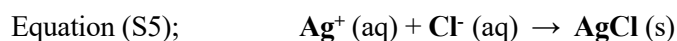

According to Equation (S5), one mole  $Ag^+$  ions consumes one mol of  $Cl^-$  ions.

$$[Cl^-]_{\text{in diluted seawater}} = \frac{0.00098\text{mol}}{10\text{mL}} \times \frac{1000\text{mL}}{1\text{L}} = 0.098 \text{ mol/L}$$

$$[Cl^-]_{\text{in original seawater}} = \frac{C_{\text{diluted}} V_{\text{diluted}}}{V_{\text{original}}} = \frac{0.098\text{mol}}{1\text{L}} \times \frac{100\text{mL}}{20\text{mL}}$$

$$= 0.49 \text{ mol/L}$$

$$[NaCl]_{\text{in original seawater}} = \frac{0.49\text{mol}}{1\text{L}} \times \frac{58.44\text{g}}{1\text{mol}} = 28.64 \text{ g/L}$$

$$= 2.86 \%$$

## S14. Supplementary Computational Results and Data

The reaction barriers for the monomeric **7-Me-X** model catalysts are discussed in this section. All catalysts in this study are supposed to operate through the typical CO<sub>2</sub>-epoxide reaction mechanism and thus, via a succession of three reaction energy barriers relative to three transition states (see Scheme of Table S12); the first corresponding to the opening of the epoxide (**TS1**), the second to the insertion of CO<sub>2</sub> (**TS2**), and finally the closing of the cyclic carbonate ring (**TS3**).<sup>6, 7</sup> First, the analysis of the reaction barriers (Table S12) for the typical neutral ascorbic acid was performed as a reference system to better understand the mechanistic differences with the single-component **7-Me-X** catalysts. Initially, there is the formation of a coordination intermediate **I1** where the epoxide forms a relatively stable adduct with ascorbic acid releasing 0.5 kcal/mol, following which, the opening of the epoxide by the iodide anion provided by tetramethylammonium iodide, as a simplified form of the TBAI reagent, implies to overcome a substantial energy barrier of 27.8 kcal/mol followed by two milder barriers of 10.6 and 7.1 kcal/mol for **TS2** and **TS3**, respectively. Overall, the rate determining step (rds) is the first, *i.e.*, the opening of the epoxide ring. Moving to **7-Me-I**, even though the formation of **I1** was disadvantaged by 1.8 kcal/mol, a strongly reduced kinetic cost of 18.4 kcal/mol was calculated for the epoxide ring-opening, indicating that the latter step is kinetically much more favorable compared to ascorbic acid. The CO<sub>2</sub> insertion step is feasible with an energy barrier of 13.5 kcal/mol while the ring-closure of the cyclic carbonate apparently requires an energy barrier of just 12.7 kcal/mol, that however, increases to 21.4 kcal/mol when calculated from the most stable previous intermediate or computed species, in particular for this system **I0**, thus representing the rds of the reaction. For the catalysts bearing different halides, *i.e.*, **7-Me-Cl** and **7-Me-Br**, the barrier for **TS1** was less energetically favorable when compared to the case of **7-Me-I**, being, respectively, 3.7 and 2.2 kcal/mol higher in energy when calculated from **I0**. For **TS2**, moderate reaction barriers were observed in both cases with no defined trend based on the halogen anion, with the CO<sub>2</sub> insertion barrier being slightly higher for bromine than for chlorine and iodine which displayed identical values. Also for these halides, **TS3** remains the crucial rds with the barriers for chlorine and bromine anions being, respectively, 0.8 and 1.4 kcal/mol higher than for iodine. In addition, for chlorine, the results in Table S12 suggest that the opening of the epoxide is also energetically important, as it is only 0.1 kcal/mol less demanding than the ring closure step, so it is necessary to consider both energy barriers as postulated by Kozuch and Shaik.<sup>8</sup>

In order to understand the different roles of the two parts of the **7-Me-I** catalyst (*i.e.* the ascorbate-based scaffold and the quaternary ammonium salt), the mechanism of the reaction catalyzed only by tetramethylammonium iodide (Me<sub>4</sub>NI) was also calculated. However, the kinetics worsened, with

energy barriers increasing up to energy limits of 28.3, 28.8 and 22.4 kcal/mol for **TS1**, **TS2** and **TS3**, respectively. Thus, the CO<sub>2</sub> insertion step, where the ascorbic acid scaffold participates the most, became the rds. Beside the results for the **7-Me-I** dimer, that is discussed in greater detail in the main text, Table S12 also includes the energy barrier values calculated for the dimeric version of catalyst **7b-I**. For dimeric **7b-I**, a slightly higher rate-limiting barrier for **TS3** compared to the **7-Me-I** dimer was calculated despite a lower energy barrier for **TS1** (ring-opening). Nevertheless, it should be noted that for dimeric **7b-I**, the complex arrangement of the ethyl side chains makes the identification of the most stable conformation much more complex than for the case of dimeric **7-Me-I**.

**Table S12.** Computed free energy surface for the cycloaddition of CO<sub>2</sub> to propylene oxide by several hydrogen bond donor catalysts [cat] in the presence of a nucleophile [Nu]. Free energies in solution are given in kcal/mol relative to the starting point. The cationic tetramethylammonium moiety is omitted for the sake of clarity.

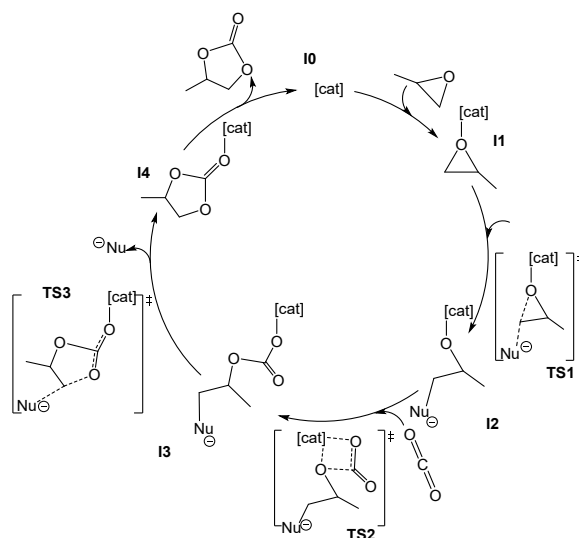

| I or TS | AsA/<br>Me <sub>4</sub> NI | 7-Me-Cl | 7-Me-Br | 7-Me-I | Me <sub>4</sub> NI | 7-Me-I<br>dimer <sup>a</sup> | 7-Et-I<br>dimer <sup>a</sup> |
|---------|----------------------------|---------|---------|--------|--------------------|------------------------------|------------------------------|
| I0      | 0.0                        | 0.0     | 0.0     | 0.0    | 0.0                | 0.0 (4.2)                    | 0.0                          |
| I1      | -0.5                       | 5.6     | 3.8     | 1.8    | 3.4                | 4.7 (12.1)                   | 0.1                          |
| TS1     | 27.3                       | 22.1    | 20.6    | 18.4   | 28.3               | 18.6 (24.5)                  | 14.6                         |
| I2      | 0.1                        | 3.0     | 4.2     | 2.3    | 28.1               | 1.5 (6.6)                    | -1.0                         |
| TS2     | 10.7                       | 15.8    | 17.5    | 15.8   | 28.8               | 13.6 (15.5)                  | 14.5                         |
| I3      | 12.1                       | 8.7     | 10.4    | 8.7    | 16.1               | 2.5 (8.9)                    | 7.0                          |
| TS3     | 19.2                       | 22.2    | 22.8    | 21.4   | 22.4               | 22.1 (21.3)                  | 27.0                         |
| I4      | 1.4                        | 4.2     | 2.9     | 1.5    | 2.5                | -0.2 (3.5)                   | 2.2                          |

<sup>a</sup> The plain values refer to a “stacked” form of the **7-Me-I** dimer; the values in brackets to a “planar” dimer, see Figure 5 of the manuscript.

### Computational details:

All theoretical calculations were performed by means of the Gaussian16 software package.<sup>9</sup> For the geometry optimizations, the B3LYP functional,<sup>10-13</sup> and the 6-31G(d) basis set were used,<sup>14</sup> together with the Grimme D3 correction term for the electronic energy.<sup>15, 16</sup> In addition, for the halides we used the small-core quasi-relativistic Stuttgart/Dresden effective core potential, with an associated valence basis set (standard SDD keywords in Gaussian16).<sup>17, 18</sup>

The stationary points were characterized using analytical frequency calculations. The nature of the transition states was confirmed by the corresponding negative vibrational frequency along with the intrinsic reaction coordinates (IRC). Energies were obtained by single-point calculations on the optimized geometries with the B3LYP-D3 functional and the 6-311+G(d,p) basis set and by estimating solvent effects with the polarizable continuous solvation model (PCM) as implemented in Gaussian16,<sup>19, 20</sup> using water as a solvent.<sup>19, 20</sup> The reported free Gibbs free energies in this work include electronic energies obtained at the B3LYP-d3/6-311+G(d,p)~sdd(pcm-H<sub>2</sub>O)//B3LYP-d3/6-31G(d)~sdd level of theory corrected with zero-point energies, thermal corrections and entropy effects computed with the B3LYP-d3/6-31G(d)~sdd level.

**Table S13.** Coordinate data sets and absolute energies (a.u.) for DFT optimized complexes for the cycloaddition of CO<sub>2</sub> to epoxides “around water”.

### ASCORBIC ACID

| I0                                       | I1                                       |
|------------------------------------------|------------------------------------------|
| 38                                       | 48                                       |
| AsAc-I0 SCF Done: -910.629713244 A.U.    | AsAc-I1 SCF Done: -1103.75017279 A.U.    |
| O -4.566795000 3.581894000 -2.959312000  | O -2.101150000 0.618224000 -1.205936000  |
| O -2.066163000 2.461232000 -4.380848000  | O -3.461787000 -2.253308000 -0.777738000 |
| H -1.521015000 1.742051000 -4.756382000  | H -2.505099000 -2.176032000 -0.564922000 |
| C -4.139589000 2.316062000 -3.052230000  | C -3.346835000 0.143896000 -1.416366000  |
| O -2.006308000 -0.313020000 -3.692529000 | O -6.182518000 -1.827891000 -1.688963000 |
| C -3.054017000 1.828105000 -3.678641000  | C -3.916967000 -1.070252000 -1.241163000 |
| O -3.967290000 0.025630000 -2.563313000  | O -5.559766000 0.308879000 -2.125720000  |
| C -2.921885000 0.411471000 -3.356717000  | C -5.322238000 -0.987767000 -1.678615000 |
| O -5.633957000 2.664517000 -0.698250000  | O -3.641597000 3.201117000 -1.039448000  |
| H -5.918919000 2.679649000 0.239592000   | H -4.054075000 4.035287000 -0.739337000  |
| O -5.728357000 0.987784000 1.353468000   | O -6.096197000 4.259900000 -0.828046000  |
| H -4.875289000 1.150063000 1.814332000   | H -6.494340000 4.059887000 0.034229000   |
| C -4.793468000 1.174681000 -2.300750000  | C -4.374493000 1.095870000 -1.967940000  |
| H -5.806373000 0.967939000 -2.666498000  | H -4.071246000 1.486829000 -2.949965000  |
| C -4.831132000 1.482937000 -0.804906000  | C -4.730681000 2.280394000 -1.062441000  |
| H -3.808950000 1.688113000 -0.459647000  | H -4.919154000 1.890215000 -0.048604000  |
| C -5.432183000 0.398606000 0.094161000   | C -5.974715000 3.030034000 -1.555788000  |
| H -6.385213000 0.049100000 -0.319032000  | H -5.839175000 3.317195000 -2.603524000  |
| H -4.745148000 -0.452388000 0.174657000  | H -6.870338000 2.406647000 -1.476522000  |
| C -1.714871000 4.074020000 -1.110470000  | O -0.836794000 -1.637795000 -0.416823000 |
| N -0.326358000 3.481053000 -1.182439000  | C 0.311386000 -2.408287000 -0.879138000  |
| C 0.371553000 4.006980000 -2.403285000   | H 1.009501000 -1.836499000 -1.486177000  |
| H -0.218683000 3.731756000 -3.279571000  | H 0.050446000 -3.408938000 -1.220037000  |
| H 0.449406000 5.093215000 -2.324953000   | C 0.181129000 -2.071916000 0.543218000   |

|                                              |                             |             |              |                                              |                             |              |              |
|----------------------------------------------|-----------------------------|-------------|--------------|----------------------------------------------|-----------------------------|--------------|--------------|
| H                                            | 1.368636000                 | 3.565042000 | -2.457507000 | H                                            | 0.790160000                 | -1.236784000 | 0.886724000  |
| C                                            | -0.411119000                | 1.973710000 | -1.265751000 | I                                            | 2.526748000                 | 0.767481000  | -0.727187000 |
| H                                            | 0.603962000                 | 1.573304000 | -1.231669000 | C                                            | -0.286734000                | -3.064895000 | 1.570702000  |
| H                                            | -0.987058000                | 1.615404000 | -0.407932000 | H                                            | 0.579846000                 | -3.532035000 | 2.052375000  |
| H                                            | -0.883013000                | 1.701950000 | -2.207485000 | H                                            | -0.878954000                | -2.569077000 | 2.347679000  |
| C                                            | 0.434116000                 | 3.860207000 | 0.063712000  | H                                            | -0.898553000                | -3.849664000 | 1.113293000  |
| H                                            | 0.486204000                 | 4.949191000 | 0.120709000  | C                                            | -0.413656000                | 3.303379000  | -0.487952000 |
| H                                            | -0.101536000                | 3.454753000 | 0.927330000  | N                                            | -0.110734000                | 3.746299000  | -1.904002000 |
| H                                            | 1.438673000                 | 3.437522000 | -0.000028000 | C                                            | -1.108856000                | 4.782922000  | -2.328037000 |
| H                                            | -5.163040000                | 3.622198000 | -2.172374000 | H                                            | -2.104567000                | 4.338806000  | -2.282396000 |
| H                                            | -2.249333000                | 3.835754000 | -2.027737000 | H                                            | -1.042116000                | 5.634250000  | -1.646861000 |
| H                                            | -2.218210000                | 3.655354000 | -0.234399000 | H                                            | -0.873241000                | 5.104401000  | -3.344891000 |
| I                                            | -2.331327000                | 2.005787000 | 2.163730000  | C                                            | -0.201376000                | 2.559496000  | -2.834250000 |
| H                                            | -1.615840000                | 5.156590000 | -1.008236000 | H                                            | -0.012696000                | 2.909762000  | -3.851460000 |
|                                              |                             |             |              | H                                            | 0.555669000                 | 1.832672000  | -2.526741000 |
|                                              |                             |             |              | H                                            | -1.194437000                | 2.124270000  | -2.738102000 |
|                                              |                             |             |              | C                                            | 1.285014000                 | 4.309982000  | -1.959544000 |
|                                              |                             |             |              | H                                            | 1.338443000                 | 5.172481000  | -1.292000000 |
|                                              |                             |             |              | H                                            | 1.981502000                 | 3.529704000  | -1.638043000 |
|                                              |                             |             |              | H                                            | 1.497275000                 | 4.615138000  | -2.986446000 |
|                                              |                             |             |              | H                                            | -1.488831000                | -0.100300000 | -0.908107000 |
|                                              |                             |             |              | H                                            | -1.427802000                | 2.906661000  | -0.461886000 |
|                                              |                             |             |              | H                                            | 0.319211000                 | 2.539804000  | -0.214558000 |
|                                              |                             |             |              | H                                            | -0.316714000                | 4.177006000  | 0.161016000  |
| Zero-point correction=                       | 0.814184 (Hartree/Particle) |             |              | Zero-point correction=                       | 0.812939 (Hartree/Particle) |              |              |
| Thermal correction to Energy=                | 0.340588                    |             |              | Thermal correction to Energy=                | 0.434272                    |              |              |
| Thermal correction to Enthalpy=              | 0.341532                    |             |              | Thermal correction to Enthalpy=              | 0.435216                    |              |              |
| Thermal correction to Gibbs Free Energy=     | 0.267066                    |             |              | Thermal correction to Gibbs Free Energy=     | 0.344292                    |              |              |
| Sum of electronic and zero-point Energies=   | -910.310328                 |             |              | Sum of electronic and zero-point Energies=   | -1103.343285                |              |              |
| Sum of electronic and thermal Energies=      | -910.289125                 |             |              | Sum of electronic and thermal Energies=      | -1103.315901                |              |              |
| Sum of electronic and thermal Enthalpies=    | -910.288181                 |             |              | Sum of electronic and thermal Enthalpies=    | -1103.314957                |              |              |
| Sum of electronic and thermal Free Energies= | -910.362648                 |             |              | Sum of electronic and thermal Free Energies= | -1103.405881                |              |              |

| TS1                                    |              |              |              | I2                                    |              |              |              |
|----------------------------------------|--------------|--------------|--------------|---------------------------------------|--------------|--------------|--------------|
| 48                                     |              |              |              | 48                                    |              |              |              |
| AsAc-TS1 SCF Done: -1103.69690000 A.U. |              |              |              | AsAc-I2 SCF Done: -1103.74752185 A.U. |              |              |              |
| O                                      | -2.622053000 | 1.561457000  | 0.021450000  | O                                     | -1.909030000 | 0.734585000  | -0.938554000 |
| O                                      | -2.744870000 | -1.613423000 | -0.157208000 | O                                     | -3.258156000 | -1.157779000 | 1.130468000  |
| H                                      | -1.912287000 | -1.258541000 | 0.314877000  | H                                     | -2.396302000 | -0.743090000 | 1.346246000  |
| C                                      | -3.442035000 | 0.705951000  | -0.668888000 | C                                     | -3.088818000 | 0.167656000  | -0.962852000 |
| O                                      | -4.955352000 | -2.128437000 | -1.944117000 | O                                     | -5.852499000 | -1.786880000 | -0.104199000 |
| C                                      | -3.451296000 | -0.645698000 | -0.721048000 | C                                     | -3.696428000 | -0.667672000 | -0.069287000 |
| O                                      | -5.205112000 | 0.120566000  | -2.079296000 | O                                     | -5.188007000 | -0.457131000 | -1.821166000 |
| C                                      | -4.573481000 | -1.037390000 | -1.622551000 | C                                     | -5.000495000 | -1.069146000 | -0.571499000 |
| O                                      | -4.763041000 | 3.216654000  | -0.234811000 | O                                     | -3.545720000 | 2.632380000  | -2.856837000 |
| H                                      | -5.419098000 | 3.890061000  | 0.025389000  | H                                     | -4.050248000 | 3.310067000  | -3.348713000 |
| O                                      | -7.364961000 | 3.686889000  | -0.893857000 | O                                     | -6.040779000 | 3.180341000  | -3.667509000 |
| H                                      | -7.978993000 | 3.223207000  | -0.302362000 | H                                     | -6.518539000 | 3.588347000  | -2.927547000 |
| C                                      | -4.532028000 | 1.257414000  | -1.548977000 | C                                     | -4.050914000 | 0.360993000  | -2.122043000 |
| H                                      | -4.123506000 | 1.853136000  | -2.381664000 | H                                     | -3.599684000 | 0.022247000  | -3.065936000 |
| C                                      | -5.525969000 | 2.131941000  | -0.782405000 | C                                     | -4.572443000 | 1.790461000  | -2.324469000 |
| H                                      | -5.959529000 | 1.524729000  | 0.028564000  | H                                     | -4.905550000 | 2.172675000  | -1.343728000 |
| C                                      | -6.645586000 | 2.704871000  | -1.647284000 | C                                     | -5.755461000 | 1.819347000  | -3.301729000 |
| H                                      | -6.214690000 | 3.240355000  | -2.499581000 | H                                     | -5.473766000 | 1.319439000  | -4.233765000 |
| H                                      | -7.291640000 | 1.904282000  | -2.025857000 | H                                     | -6.627129000 | 1.310963000  | -2.880739000 |
| O                                      | -0.605036000 | -0.613978000 | 0.842405000  | O                                     | -0.640843000 | -0.036086000 | 1.161303000  |
| C                                      | 0.312415000  | -1.105064000 | -0.832958000 | C                                     | -0.424616000 | -2.029366000 | -0.145490000 |
| H                                      | -0.130001000 | -0.277309000 | -1.348804000 | H                                     | -0.849869000 | -1.503515000 | -0.997929000 |
| H                                      | -0.065037000 | -2.082047000 | -1.117863000 | H                                     | -1.198225000 | -2.607808000 | 0.359110000  |
| C                                      | 0.726014000  | -0.910792000 | 0.570933000  | C                                     | 0.289321000  | -1.058974000 | 0.800407000  |
| H                                      | 1.401209000  | -0.051114000 | 0.723503000  | H                                     | 1.142033000  | -0.610686000 | 0.262534000  |
| I                                      | 2.400838000  | -0.867295000 | -2.563370000 | I                                     | 0.961294000  | -3.511483000 | -1.060476000 |
| C                                      | 1.288985000  | -2.140100000 | 1.271252000  | C                                     | 0.783019000  | -1.700170000 | 2.089773000  |
| H                                      | 2.293453000  | -2.374025000 | 0.901271000  | H                                     | 1.547161000  | -2.457079000 | 1.892561000  |
| H                                      | 1.338042000  | -1.958721000 | 2.350225000  | H                                     | 1.205012000  | -0.930145000 | 2.743224000  |
| H                                      | 0.634541000  | -3.002144000 | 1.099799000  | H                                     | -0.055749000 | -2.172103000 | 2.613646000  |

|                                                           |              |             |              |                                                           |              |             |              |
|-----------------------------------------------------------|--------------|-------------|--------------|-----------------------------------------------------------|--------------|-------------|--------------|
| C                                                         | -0.642499000 | 1.696316000 | -2.851231000 | C                                                         | 0.744889000  | 2.664517000 | -0.556917000 |
| N                                                         | 0.030328000  | 2.763451000 | -2.020764000 | N                                                         | -0.159563000 | 3.397873000 | -1.513937000 |
| C                                                         | -0.954937000 | 3.863044000 | -1.745275000 | C                                                         | 0.494458000  | 4.675296000 | -1.943888000 |
| H                                                         | -1.284861000 | 4.289033000 | -2.695136000 | H                                                         | 0.667960000  | 5.303556000 | -1.067798000 |
| H                                                         | -1.799199000 | 3.432187000 | -1.206738000 | H                                                         | 1.444161000  | 4.444579000 | -2.430971000 |
| H                                                         | -0.467533000 | 4.631144000 | -1.141777000 | H                                                         | -0.166428000 | 5.188734000 | -2.644197000 |
| C                                                         | 1.214555000  | 3.291339000 | -2.785655000 | C                                                         | -1.465032000 | 3.700169000 | -0.811211000 |
| H                                                         | 1.708868000  | 4.055831000 | -2.183341000 | H                                                         | -2.125139000 | 4.210267000 | -1.510788000 |
| H                                                         | 1.895250000  | 2.457268000 | -2.975747000 | H                                                         | -1.907536000 | 2.738109000 | -0.540290000 |
| H                                                         | 0.865709000  | 3.721064000 | -3.726867000 | H                                                         | -1.242980000 | 4.322618000 | 0.058446000  |
| C                                                         | 0.521325000  | 2.182386000 | -0.709101000 | C                                                         | -0.420032000 | 2.528000000 | -2.727412000 |
| H                                                         | -0.302815000 | 1.687853000 | -0.188396000 | H                                                         | 0.540088000  | 2.331602000 | -3.209788000 |
| H                                                         | 1.311779000  | 1.467462000 | -0.941555000 | H                                                         | -0.915841000 | 1.618473000 | -2.373708000 |
| H                                                         | 0.922604000  | 3.004019000 | -0.112153000 | H                                                         | -1.094810000 | 3.063148000 | -3.394099000 |
| H                                                         | -3.187947000 | 2.311960000 | 0.301136000  | H                                                         | -1.100294000 | 0.297384000 | 0.317434000  |
| H                                                         | -1.003000000 | 2.157415000 | -3.773291000 | H                                                         | 0.989171000  | 3.332467000 | 0.271714000  |
| H                                                         | 0.094433000  | 0.922568000 | -3.081866000 | H                                                         | 0.225701000  | 1.785426000 | -0.177634000 |
| H                                                         | -1.474681000 | 1.284638000 | -2.280386000 | H                                                         | 1.655677000  | 2.377265000 | -1.085833000 |
| Zero-point correction= 0.404739 (Hartree/Particle)        |              |             |              | Zero-point correction= 0.407072 (Hartree/Particle)        |              |             |              |
| Thermal correction to Energy= 0.431268                    |              |             |              | Thermal correction to Energy= 0.433681                    |              |             |              |
| Thermal correction to Enthalpy= 0.432212                  |              |             |              | Thermal correction to Enthalpy= 0.434625                  |              |             |              |
| Thermal correction to Gibbs Free Energy= 0.344673         |              |             |              | Thermal correction to Gibbs Free Energy= 0.346104         |              |             |              |
| Sum of electronic and zero-point Energies= -1103.292161   |              |             |              | Sum of electronic and zero-point Energies= -1103.340450   |              |             |              |
| Sum of electronic and thermal Energies= -1103.265632      |              |             |              | Sum of electronic and thermal Energies= -1103.313841      |              |             |              |
| Sum of electronic and thermal Enthalpies= -1103.264688    |              |             |              | Sum of electronic and thermal Enthalpies= -1103.312896    |              |             |              |
| Sum of electronic and thermal Free Energies= -1103.352227 |              |             |              | Sum of electronic and thermal Free Energies= -1103.401418 |              |             |              |

| <b>TS2</b> |                                        |             |              | <b>I3</b> |                                       |              |              |
|------------|----------------------------------------|-------------|--------------|-----------|---------------------------------------|--------------|--------------|
| 51         | AsAc-TS2 SCF Done: -1292.33288884 A.U. |             |              | 51        | AsAc-I3 SCF Done: -1292.32942907 A.U. |              |              |
| O          | -0.001628000                           | 2.758253000 | -1.123582000 | O         | -2.020159000                          | 1.749913000  | -0.825713000 |
| O          | -3.092490000                           | 3.516160000 | -0.679889000 | O         | -2.022590000                          | 1.302246000  | 2.220661000  |
| H          | -2.479629000                           | 4.053759000 | -0.150528000 | H         | -1.054179000                          | 1.095256000  | 2.020726000  |
| C          | -1.132272000                           | 2.403434000 | -1.748419000 | C         | -2.739964000                          | 0.869304000  | -0.078616000 |
| O          | -4.441444000                           | 1.902156000 | -2.659392000 | O         | -4.083251000                          | -0.818223000 | 2.620867000  |
| C          | -2.435365000                           | 2.716065000 | -1.554778000 | C         | -2.745156000                          | 0.694632000  | 1.254141000  |
| O          | -2.389149000                           | 1.140936000 | -3.256978000 | O         | -4.252181000                          | -0.842089000 | 0.356548000  |
| C          | -3.249941000                           | 1.931869000 | -2.499680000 | C         | -3.719050000                          | -0.375971000 | 1.564280000  |
| O          | 0.952192000                            | 2.419861000 | -3.948138000 | O         | -3.889490000                          | 1.112941000  | -2.681727000 |
| H          | 1.406990000                            | 2.260747000 | -4.798533000 | H         | -4.443037000                          | 1.131597000  | -3.484240000 |
| O          | 0.455631000                            | 1.361628000 | -6.375979000 | O         | -6.161399000                          | -0.149437000 | -3.499235000 |
| H          | -0.066049000                           | 1.988653000 | -6.902044000 | H         | -6.929708000                          | 0.311082000  | -3.125424000 |
| C          | -1.032864000                           | 1.442338000 | -2.904413000 | C         | -3.595129000                          | -0.184444000 | -0.723525000 |
| H          | -0.520823000                           | 0.522592000 | -2.593391000 | H         | -2.949835000                          | -0.904929000 | -1.247708000 |
| C          | -0.384529000                           | 1.984019000 | -4.188864000 | C         | -4.626197000                          | 0.364331000  | -1.706623000 |
| H          | -1.006344000                           | 2.831741000 | -4.526344000 | H         | -5.313624000                          | 1.030679000  | -1.159859000 |
| C          | -0.359285000                           | 0.912552000 | -5.286121000 | C         | -5.422647000                          | -0.727397000 | -2.416904000 |
| H          | 0.133386000                            | 0.012041000 | -4.905368000 | H         | -4.734022000                          | -1.442199000 | -2.878089000 |
| H          | -1.375451000                           | 0.652430000 | -5.599311000 | H         | -6.062767000                          | -1.263313000 | -1.706114000 |
| O          | -0.632659000                           | 3.994981000 | 1.120408000  | O         | 0.398888000                           | 1.021577000  | 1.269718000  |
| C          | -0.799267000                           | 3.847548000 | 3.470738000  | C         | 0.406736000                           | 0.109178000  | 0.383423000  |
| H          | -0.802589000                           | 4.933786000 | 3.533516000  | O         | 1.284973000                           | 0.454288000  | -0.671417000 |
| H          | 0.206583000                            | 3.447539000 | 3.600714000  | O         | -0.237427000                          | -0.936948000 | 0.319247000  |
| C          | -1.432277000                           | 3.388324000 | 2.160592000  | C         | -0.038790000                          | -0.667687000 | -2.388663000 |
| H          | -2.453384000                           | 3.775405000 | 2.100927000  | H         | -0.672846000                          | 0.208321000  | -2.276762000 |
| I          | -1.937578000                           | 3.196824000 | 5.262253000  | H         | -0.529541000                          | -1.546156000 | -1.984650000 |
| C          | -1.400361000                           | 1.884797000 | 1.925321000  | C         | 1.361489000                           | -0.427787000 | -1.807184000 |
| H          | -1.953782000                           | 1.360067000 | 2.708226000  | H         | 1.942963000                           | 0.161016000  | -2.523724000 |
| H          | -1.862529000                           | 1.645972000 | 0.963479000  | I         | 0.029419000                           | -1.019759000 | -4.600146000 |
| H          | -0.366776000                           | 1.520132000 | 1.920754000  | C         | 2.108028000                           | -1.718735000 | -1.484262000 |
| C          | 0.043839000                            | 5.498221000 | -2.852099000 | H         | 2.226756000                           | -2.324170000 | -2.389439000 |
| N          | 1.518387000                            | 5.798610000 | -2.715131000 | H         | 3.101087000                           | -1.483874000 | -1.088256000 |
| C          | 1.682392000                            | 7.175496000 | -2.125434000 | H         | 1.552307000                           | -2.288672000 | -0.736831000 |
| H          | 1.242354000                            | 7.902154000 | -2.812132000 | C         | 0.593405000                           | 3.520923000  | -1.087500000 |
| H          | 1.165671000                            | 7.184906000 | -1.163160000 | N         | 0.671994000                           | 4.235220000  | 0.239264000  |
| H          | 2.748896000                            | 7.376219000 | -2.003026000 | C         | 0.885533000                           | 5.700136000  | 0.012461000  |

|                                                           |              |             |              |                                                           |              |             |              |
|-----------------------------------------------------------|--------------|-------------|--------------|-----------------------------------------------------------|--------------|-------------|--------------|
| C                                                         | 2.159016000  | 5.720539000 | -4.066792000 | H                                                         | 1.825461000  | 5.845402000 | -0.523592000 |
| H                                                         | 3.225962000  | 5.931365000 | -3.969778000 | H                                                         | 0.055562000  | 6.093377000 | -0.578089000 |
| H                                                         | 2.002936000  | 4.711754000 | -4.451887000 | H                                                         | 0.926829000  | 6.207404000 | 0.978216000  |
| H                                                         | 1.693288000  | 6.455855000 | -4.726549000 | C                                                         | 1.822016000  | 3.659820000 | 1.035291000  |
| C                                                         | 2.166217000  | 4.780959000 | -1.797544000 | H                                                         | 1.883830000  | 4.199721000 | 1.982685000  |
| H                                                         | 1.692896000  | 4.884799000 | -0.820123000 | H                                                         | 1.606087000  | 2.595945000 | 1.195923000  |
| H                                                         | 1.983410000  | 3.788940000 | -2.208137000 | H                                                         | 2.739445000  | 3.802145000 | 0.460266000  |
| H                                                         | 3.234091000  | 5.008515000 | -1.754789000 | C                                                         | -0.615079000 | 4.022912000 | 1.001434000  |
| H                                                         | -0.198774000 | 3.219585000 | -0.256707000 | H                                                         | -1.437457000 | 4.432827000 | 0.413712000  |
| H                                                         | -0.393949000 | 6.244807000 | -3.518559000 | H                                                         | -0.761143000 | 2.957140000 | 1.151481000  |
| H                                                         | -0.052729000 | 4.498823000 | -3.266029000 | H                                                         | -0.533992000 | 4.539300000 | 1.959811000  |
| C                                                         | -0.814086000 | 5.455745000 | 0.863583000  | H                                                         | -2.446627000 | 1.768494000 | -1.709431000 |
| O                                                         | 0.127465000  | 5.875347000 | 0.162544000  | H                                                         | 1.502570000  | 3.746380000 | -1.649075000 |
| O                                                         | -1.838123000 | 5.946517000 | 1.319732000  | H                                                         | 0.520565000  | 2.449881000 | -0.902374000 |
| H                                                         | -0.391101000 | 5.557638000 | -1.855489000 | H                                                         | -0.285210000 | 3.883921000 | -1.622421000 |
| Zero-point correction= 0.421726 (Hartree/Particle)        |              |             |              | Zero-point correction= 0.421381 (Hartree/Particle)        |              |             |              |
| Thermal correction to Energy= 0.450409                    |              |             |              | Thermal correction to Energy= 0.450920                    |              |             |              |
| Thermal correction to Enthalpy= 0.451353                  |              |             |              | Thermal correction to Enthalpy= 0.451864                  |              |             |              |
| Thermal correction to Gibbs Free Energy= 0.359761         |              |             |              | Thermal correction to Gibbs Free Energy= 0.356628         |              |             |              |
| Sum of electronic and zero-point Energies= -1291.911163   |              |             |              | Sum of electronic and zero-point Energies= -1291.908048   |              |             |              |
| Sum of electronic and thermal Energies= -1291.882480      |              |             |              | Sum of electronic and thermal Energies= -1291.878509      |              |             |              |
| Sum of electronic and thermal Enthalpies= -1291.881536    |              |             |              | Sum of electronic and thermal Enthalpies= -1291.877565    |              |             |              |
| Sum of electronic and thermal Free Energies= -1291.973128 |              |             |              | Sum of electronic and thermal Free Energies= -1291.972801 |              |             |              |

| <b>TS3</b> |                                        |              |              | <b>I4</b> |                                       |              |               |
|------------|----------------------------------------|--------------|--------------|-----------|---------------------------------------|--------------|---------------|
| 51         | AsAc-TS3 SCF Done: -1292.32272320 A.U. |              |              | 51        | AsAc-I4 SCF Done: -1292.36909062 A.U. |              |               |
| O          | -2.352725000                           | 0.798832000  | 0.029694000  | O         | -3.279715000                          | 2.644233000  | -0.589146000  |
| O          | -3.474525000                           | -2.152650000 | 0.425692000  | O         | -2.553684000                          | 0.937060000  | 1.827375000   |
| H          | -2.612291000                           | -1.955061000 | 0.859633000  | H         | -1.857701000                          | 0.310530000  | 2.120950000   |
| C          | -3.323457000                           | 0.099738000  | -0.591067000 | C         | -3.297413000                          | 1.300947000  | -0.466222000  |
| O          | -5.662269000                           | -2.282227000 | -1.505544000 | O         | -3.090627000                          | -1.851475000 | 0.936948000   |
| C          | -3.803368000                           | -1.152316000 | -0.413417000 | C         | -2.966593000                          | 0.542064000  | 0.594970000   |
| O          | -5.073394000                           | -0.172141000 | -2.097510000 | O         | -3.615090000                          | -0.929269000 | -1.077124000  |
| C          | -4.930346000                           | -1.342535000 | -1.346023000 | C         | -3.205753000                          | -0.869643000 | 0.247090000   |
| O          | -3.646742000                           | 3.091012000  | -1.353943000 | O         | -5.084844000                          | 2.061328000  | -2.529594000  |
| H          | -4.117871000                           | 3.936204000  | -1.494154000 | H         | -5.718131000                          | 2.147357000  | -3.265857000  |
| O          | -6.028409000                           | 3.928896000  | -2.266288000 | O         | -6.520454000                          | 0.350230000  | -4.086923000  |
| H          | -6.678765000                           | 3.981089000  | -1.547691000 | H         | -7.292582000                          | 0.077692000  | -3.565334000  |
| C          | -4.054619000                           | 0.757788000  | -1.727139000 | C         | -3.669395000                          | 0.399129000  | -1.612696000  |
| H          | -3.395372000                           | 0.910804000  | -2.597500000 | H         | -2.917317000                          | 0.498701000  | -2.407157000  |
| C          | -4.689386000                           | 2.112254000  | -1.403270000 | C         | -5.057828000                          | 0.672762000  | -2.189165000  |
| H          | -5.191082000                           | 2.048193000  | -0.424595000 | H         | -5.813634000                          | 0.460718000  | -1.414465000  |
| C          | -5.701285000                           | 2.547437000  | -2.469044000 | C         | -5.347816000                          | -0.156154000 | -3.439882000  |
| H          | -5.239354000                           | 2.493784000  | -3.460115000 | H         | -4.534101000                          | -0.027658000 | -4.160106000  |
| H          | -6.584546000                           | 1.901375000  | -2.462312000 | H         | -5.431549000                          | -1.220373000 | -3.187865000  |
| O          | -1.187874000                           | -1.043292000 | 1.458406000  | O         | 0.039558000                           | -0.107278000 | 1.925781000   |
| C          | 0.031613000                            | -1.038493000 | 1.186007000  | C         | 0.414942000                           | -0.574857000 | 0.871735000   |
| O          | 0.631219000                            | 0.210060000  | 1.172969000  | O         | 1.470396000                           | -0.099073000 | 0.181552000   |
| O          | 0.790908000                            | -2.002223000 | 0.894786000  | O         | -0.166952000                          | -1.602800000 | 0.244588000   |
| C          | 2.312204000                            | -1.018881000 | -0.006146000 | C         | 0.405180000                           | -1.745188000 | -1.076144000  |
| H          | 1.749827000                            | -1.085663000 | -0.922821000 | H         | -0.290537000                          | -1.316649000 | -1.8101678000 |
| H          | 3.003684000                            | -1.818613000 | 0.207606000  | H         | 0.556695000                           | -2.809759000 | -1.263637000  |
| C          | 2.063542000                            | 0.097297000  | 0.993042000  | C         | 1.714149000                           | -0.941451000 | -0.986450000  |
| H          | 2.353279000                            | 1.063173000  | 0.583665000  | H         | 1.814494000                           | -0.267191000 | -1.839085000  |
| I          | 4.219490000                            | 0.216170000  | -1.529848000 | I         | -0.260280000                          | 1.416996000  | -3.333608000  |
| C          | 2.772442000                            | -0.137710000 | 2.320286000  | C         | 2.961341000                           | -1.775563000 | -0.750563000  |
| H          | 3.855872000                            | -0.127019000 | 2.164561000  | H         | 3.176149000                           | -2.378115000 | -1.640152000  |
| H          | 2.507952000                            | 0.652054000  | 3.029183000  | H         | 3.823617000                           | -1.131868000 | -0.552201000  |
| H          | 2.480157000                            | -1.104976000 | 2.738432000  | H         | 2.823300000                           | -2.449857000 | 0.102522000   |
| C          | -0.052668000                           | 1.393930000  | -2.035729000 | C         | -0.666334000                          | 4.534695000  | -0.986440000  |
| N          | 0.107475000                            | 2.857743000  | -1.709395000 | N         | 0.277938000                           | 3.911885000  | 0.012478000   |
| C          | -0.374802000                           | 3.120053000  | -0.298912000 | C         | 0.503685000                           | 4.855215000  | 1.154051000   |
| H          | -1.443078000                           | 2.909400000  | -0.254238000 | H         | 0.942535000                           | 5.780039000  | 0.773827000   |
| H          | 0.155107000                            | 2.451756000  | 0.380339000  | H         | -0.455082000                          | 5.063411000  | 1.632286000   |
| H          | -0.166380000                           | 4.165590000  | -0.063251000 | H         | 1.180042000                           | 4.386020000  | 1.870984000   |

|                                                           |              |             |              |                                                           |              |             |              |
|-----------------------------------------------------------|--------------|-------------|--------------|-----------------------------------------------------------|--------------|-------------|--------------|
| C                                                         | -0.718764000 | 3.671919000 | -2.669248000 | C                                                         | 1.588772000  | 3.599007000 | -0.663226000 |
| H                                                         | -0.563867000 | 4.730010000 | -2.447717000 | H                                                         | 2.242159000  | 3.110530000 | 0.061871000  |
| H                                                         | -0.387243000 | 3.454788000 | -3.686559000 | H                                                         | 1.385378000  | 2.930047000 | -1.504537000 |
| H                                                         | -1.770045000 | 3.408547000 | -2.531545000 | H                                                         | 2.032752000  | 4.533018000 | -1.014333000 |
| C                                                         | 1.559031000  | 3.235425000 | -1.838350000 | C                                                         | -0.323973000 | 2.631435000 | 0.539733000  |
| H                                                         | 2.163257000  | 2.591754000 | -1.197750000 | H                                                         | -1.272731000 | 2.851290000 | 1.023985000  |
| H                                                         | 1.873864000  | 3.084634000 | -2.872090000 | H                                                         | -0.485532000 | 1.966893000 | -0.309908000 |
| H                                                         | 1.675219000  | 4.283357000 | -1.555992000 | H                                                         | 0.368475000  | 2.179552000 | 1.247955000  |
| H                                                         | -1.916634000 | 0.222390000 | 0.724383000  | H                                                         | -3.794082000 | 2.856437000 | -1.397738000 |
| H                                                         | -1.107140000 | 1.140446000 | -1.967909000 | H                                                         | -0.232326000 | 5.475909000 | -1.330920000 |
| H                                                         | 0.346557000  | 1.214776000 | -3.035071000 | H                                                         | -0.788645000 | 3.836281000 | -1.818487000 |
| H                                                         | 0.499341000  | 0.818131000 | -1.296430000 | H                                                         | -1.625017000 | 4.698915000 | -0.494453000 |
| Zero-point correction= 0.421565 (Hartree/Particle)        |              |             |              | Zero-point correction= 0.423635 (Hartree/Particle)        |              |             |              |
| Thermal correction to Energy= 0.450552                    |              |             |              | Thermal correction to Energy= 0.453362                    |              |             |              |
| Thermal correction to Enthalpy= 0.451496                  |              |             |              | Thermal correction to Enthalpy= 0.454306                  |              |             |              |
| Thermal correction to Gibbs Free Energy= 0.357930         |              |             |              | Thermal correction to Gibbs Free Energy= 0.358541         |              |             |              |
| Sum of electronic and zero-point Energies= -1291.901158   |              |             |              | Sum of electronic and zero-point Energies= -1291.945455   |              |             |              |
| Sum of electronic and thermal Energies= -1291.872171      |              |             |              | Sum of electronic and thermal Energies= -1291.915728      |              |             |              |
| Sum of electronic and thermal Enthalpies= -1291.871227    |              |             |              | Sum of electronic and thermal Enthalpies= -1291.914784    |              |             |              |
| Sum of electronic and thermal Free Energies= -1291.964793 |              |             |              | Sum of electronic and thermal Free Energies= -1292.010549 |              |             |              |

### 7-Me-Cl

| <b>I0</b> |                                          |              |              | <b>I1</b> |                                          |              |              |
|-----------|------------------------------------------|--------------|--------------|-----------|------------------------------------------|--------------|--------------|
| 43        | 7-Me-Cl I0 SCF Done: -1511.99908216 A.U. |              |              | 53        | 7-Me-Cl I1 SCF Done: -1705.12827488 A.U. |              |              |
| O         | -2.876651000                             | 1.874170000  | -1.713946000 | O         | -2.380611000                             | 1.067403000  | 0.125256000  |
| O         | -1.999601000                             | -1.028435000 | -1.225855000 | O         | -2.959979000                             | -1.643469000 | 1.054840000  |
| H         | -1.263158000                             | -0.366801000 | -1.308143000 | H         | -2.108818000                             | -1.178532000 | 1.224368000  |
| C         | -3.657744000                             | 0.764033000  | -1.585609000 | C         | -3.429499000                             | 0.324084000  | -0.300316000 |
| O         | -4.412705000                             | -2.613982000 | -1.395434000 | O         | -5.194773000                             | -2.639943000 | -0.643540000 |
| C         | -3.202711000                             | -0.497056000 | -1.422256000 | C         | -3.622497000                             | -0.941107000 | 0.112631000  |
| O         | -5.489055000                             | -0.660723000 | -1.781446000 | O         | -5.048988000                             | -0.617245000 | -1.662841000 |
| C         | -4.363568000                             | -1.418794000 | -1.514674000 | C         | -4.685245000                             | -1.550842000 | -0.712375000 |
| O         | -5.933568000                             | 2.862794000  | -1.069502000 | O         | -4.498956000                             | 2.979179000  | -1.462497000 |
| H         | -6.771845000                             | 3.238737000  | -0.740255000 | H         | -5.089219000                             | 3.635457000  | -1.880332000 |
| O         | -8.372524000                             | 1.981852000  | -0.330474000 | O         | -6.754534000                             | 3.020734000  | -2.940027000 |
| H         | -8.331250000                             | 1.717447000  | 0.602615000  | H         | -7.517552000                             | 2.961837000  | -2.342866000 |
| C         | -5.147191000                             | 0.734060000  | -1.852864000 | C         | -4.245283000                             | 0.579848000  | -1.543025000 |
| H         | -5.371609000                             | 1.104675000  | -2.863058000 | H         | -3.559054000                             | 0.652118000  | -2.401465000 |
| C         | -6.069918000                             | 1.464543000  | -0.867852000 | C         | -5.223456000                             | 1.754954000  | -1.556936000 |
| H         | -5.769734000                             | 1.183209000  | 0.157928000  | H         | -5.909875000                             | 1.649469000  | -0.698210000 |
| C         | -7.542045000                             | 1.082656000  | -1.077346000 | C         | -6.036004000                             | 1.781296000  | -2.856602000 |
| H         | -7.813966000                             | 1.233862000  | -2.126763000 | H         | -5.351021000                             | 1.776962000  | -3.709707000 |
| H         | -7.722447000                             | 0.035591000  | -0.815165000 | H         | -6.696875000                             | 0.911144000  | -2.927120000 |
| C         | -3.041258000                             | 2.962776000  | -0.792303000 | O         | -0.339909000                             | -0.587403000 | 0.703934000  |
| C         | -1.646244000                             | 3.454803000  | -0.383140000 | C         | -0.296147000                             | -1.085397000 | -0.669080000 |
| C         | -0.820505000                             | 3.650125000  | -1.662489000 | H         | 0.003592000                              | -0.358286000 | -1.419602000 |
| N         | 0.542478000                              | 4.341883000  | -1.508192000 | H         | -1.165010000                             | -1.676552000 | -0.949494000 |
| O         | -1.034863000                             | 2.586763000  | 0.539061000  | C         | 0.621937000                              | -1.616452000 | 0.345217000  |
| H         | -0.652508000                             | 1.816592000  | 0.048584000  | H         | 1.648549000                              | -1.246520000 | 0.344534000  |
| C         | 0.348250000                              | 5.822163000  | -1.385299000 | Cl        | -1.162622000                             | 0.883756000  | -3.498406000 |
| H         | -0.159918000                             | 6.193667000  | -2.277291000 | C         | 0.401438000                              | -2.961538000 | 0.987401000  |
| H         | -0.256001000                             | 6.026083000  | -0.500408000 | H         | 0.969121000                              | -3.732848000 | 0.453987000  |
| H         | 1.322620000                              | 6.304383000  | -1.285288000 | H         | 0.733580000                              | -2.954524000 | 2.031832000  |
| C         | 1.327220000                              | 4.023747000  | -2.757353000 | H         | -0.660399000                             | -3.226323000 | 0.959444000  |
| H         | 2.281567000                              | 4.553499000  | -2.718745000 | C         | -2.518709000                             | 2.347776000  | 0.747368000  |
| H         | 1.478711000                              | 2.941051000  | -2.780247000 | C         | -1.205448000                             | 3.058591000  | 0.409536000  |
| H         | 0.751194000                              | 4.348971000  | -3.625974000 | C         | -1.192598000                             | 3.263737000  | -1.113469000 |
| C         | 1.350323000                              | 3.852332000  | -0.321630000 | N         | 0.100563000                              | 3.812674000  | -1.715392000 |
| H         | 0.810469000                              | 4.074766000  | 0.594969000  | O         | -0.088602000                             | 2.338610000  | 0.904337000  |
| H         | 1.475277000                              | 2.772157000  | -0.421205000 | H         | -0.236301000                             | 1.375811000  | 0.765125000  |
| H         | 2.310838000                              | 4.372408000  | -0.353659000 | C         | 0.610118000                              | 4.981134000  | -0.933481000 |
| H         | -3.563365000                             | 2.638736000  | 0.111162000  | H         | -0.186117000                             | 5.723514000  | -0.842939000 |
| H         | -3.630875000                             | 3.752961000  | -1.268907000 | H         | 0.920655000                              | 4.635012000  | 0.052642000  |
| H         | -1.368793000                             | 4.250786000  | -2.393977000 | H         | 1.461945000                              | 5.414491000  | -1.461862000 |



|                                              |                             |             |              |                                              |                             |             |              |
|----------------------------------------------|-----------------------------|-------------|--------------|----------------------------------------------|-----------------------------|-------------|--------------|
| H                                            | -0.611265000                | 2.663724000 | -2.077784000 | C                                            | -0.218949000                | 4.227844000 | -3.132224000 |
| H                                            | -1.794699000                | 4.411123000 | 0.141515000  | H                                            | 0.705028000                 | 4.560868000 | -3.610447000 |
| Cl                                           | 0.601428000                 | 0.691244000 | -1.403206000 | H                                            | -0.631736000                | 3.348930000 | -3.643149000 |
|                                              |                             |             |              | H                                            | -0.941702000                | 5.045939000 | -3.101988000 |
|                                              |                             |             |              | C                                            | 1.169391000                 | 2.739529000 | -1.781471000 |
|                                              |                             |             |              | H                                            | 1.369286000                 | 2.408797000 | -0.765472000 |
|                                              |                             |             |              | H                                            | 0.769246000                 | 1.927702000 | -2.399827000 |
|                                              |                             |             |              | H                                            | 2.057865000                 | 3.183537000 | -2.237314000 |
|                                              |                             |             |              | H                                            | -2.598500000                | 2.214611000 | 1.833517000  |
|                                              |                             |             |              | H                                            | -3.384393000                | 2.890337000 | 0.362075000  |
|                                              |                             |             |              | H                                            | -1.982542000                | 3.969704000 | -1.383432000 |
|                                              |                             |             |              | H                                            | -1.380888000                | 2.328431000 | -1.653667000 |
|                                              |                             |             |              | H                                            | -1.196908000                | 4.025717000 | 0.928270000  |
| Zero-point correction=                       | 0.360191 (Hartree/Particle) |             |              | Zero-point correction=                       | 0.449121 (Hartree/Particle) |             |              |
| Thermal correction to Energy=                | 0.382845                    |             |              | Thermal correction to Energy=                | 0.477635                    |             |              |
| Thermal correction to Enthalpy=              | 0.383789                    |             |              | Thermal correction to Enthalpy=              | 0.478579                    |             |              |
| Thermal correction to Gibbs Free Energy=     | 0.307588                    |             |              | Thermal correction to Gibbs Free Energy=     | 0.388939                    |             |              |
| Sum of electronic and zero-point Energies=   | -1511.638891                |             |              | Sum of electronic and zero-point Energies=   | -1704.679154                |             |              |
| Sum of electronic and thermal Energies=      | -1511.616237                |             |              | Sum of electronic and thermal Energies=      | -1704.650640                |             |              |
| Sum of electronic and thermal Enthalpies=    | -1511.615293                |             |              | Sum of electronic and thermal Enthalpies=    | -1704.649696                |             |              |
| Sum of electronic and thermal Free Energies= | -1511.691494                |             |              | Sum of electronic and thermal Free Energies= | -1704.739336                |             |              |

| <b>TS1</b> |                                           |              |              | <b>I2</b> |                                          |              |              |
|------------|-------------------------------------------|--------------|--------------|-----------|------------------------------------------|--------------|--------------|
| 53         | 7-Me-Cl TS1 SCF Done: -1705.09829096 A.U. |              |              | 53        | 7-Me-Cl I2 SCF Done: -1705.12229892 A.U. |              |              |
| O          | -2.720746000                              | 1.026088000  | -0.869106000 | O         | -2.474199000                             | 1.084292000  | -0.810303000 |
| O          | -3.202082000                              | -1.635118000 | 0.679211000  | O         | -2.750525000                             | -1.555149000 | 0.732236000  |
| H          | -2.275090000                              | -1.269483000 | 0.753037000  | H         | -1.577412000                             | -0.786820000 | 1.153060000  |
| C          | -3.840481000                              | 0.246283000  | -0.794098000 | C         | -3.510056000                             | 0.165023000  | -0.813049000 |
| O          | -5.864088000                              | -2.466637000 | -0.057228000 | O         | -5.284229000                             | -2.750678000 | -0.250138000 |
| C          | -3.976949000                              | -0.924169000 | -0.132925000 | C         | -3.539688000                             | -1.014273000 | -0.124272000 |
| O          | -5.929786000                              | -0.613298000 | -1.355364000 | O         | -5.426162000                             | -0.906201000 | -1.547808000 |
| C          | -5.324320000                              | -1.470300000 | -0.457091000 | C         | -4.807795000                             | -1.697721000 | -0.585020000 |
| O          | -5.107760000                              | 2.880435000  | -1.888335000 | O         | -4.911470000                             | 2.689317000  | -1.808595000 |
| H          | -5.777497000                              | 3.569959000  | -2.059314000 | H         | -5.620985000                             | 3.334391000  | -1.988490000 |
| O          | -7.791465000                              | 3.073893000  | -2.051309000 | O         | -7.587039000                             | 2.652665000  | -2.294685000 |
| H          | -8.157689000                              | 3.208005000  | -1.162498000 | H         | -8.040599000                             | 2.653585000  | -1.436438000 |
| C          | -5.061599000                              | 0.494294000  | -1.648689000 | C         | -4.665739000                             | 0.297318000  | -1.754204000 |
| H          | -4.802795000                              | 0.469711000  | -2.716579000 | H         | -4.347982000                             | 0.335493000  | -2.809108000 |
| C          | -5.857376000                              | 1.779560000  | -1.389882000 | C         | -5.612183000                             | 1.480405000  | -1.515311000 |
| H          | -6.019394000                              | 1.876105000  | -0.301281000 | H         | -5.917064000                             | 1.457269000  | -0.454150000 |
| C          | -7.218830000                              | 1.760461000  | -2.097704000 | C         | -6.861211000                             | 1.417164000  | -2.397169000 |
| H          | -7.076005000                              | 1.537924000  | -3.159747000 | H         | -6.565327000                             | 1.338851000  | -3.448292000 |
| H          | -7.879603000                              | 1.002153000  | -1.666054000 | H         | -7.478804000                             | 0.549993000  | -2.140229000 |
| O          | -0.742499000                              | -0.671971000 | 0.925504000  | O         | -0.647378000                             | -0.338941000 | 1.361768000  |
| C          | -0.294727000                              | -0.834394000 | -0.857136000 | C         | -0.096465000                             | -0.995612000 | -0.874120000 |
| H          | -0.738629000                              | 0.081208000  | -1.173727000 | H         | -0.510671000                             | -0.025847000 | -1.132632000 |
| H          | -0.741696000                              | -1.749536000 | -1.228617000 | H         | -0.805099000                             | -1.781164000 | -1.132171000 |
| C          | 0.534422000                               | -0.899387000 | 0.338721000  | C         | 0.326928000                              | -1.041506000 | 0.598574000  |
| H          | 1.215959000                               | -0.054489000 | 0.485453000  | H         | 1.269074000                              | -0.487116000 | 0.704517000  |
| Cl         | 1.153180000                               | -0.315033000 | -2.843551000 | Cl        | 1.391290000                              | -1.229580000 | -2.019015000 |
| C          | 1.188701000                               | -2.219963000 | 0.684023000  | C         | 0.498477000                              | -2.469329000 | 1.107653000  |
| H          | 2.054809000                               | -2.385817000 | 0.033894000  | H         | 1.233773000                              | -3.013458000 | 0.504282000  |
| H          | 1.518722000                               | -2.218835000 | 1.728249000  | H         | 0.829880000                              | -2.457429000 | 2.150409000  |
| H          | 0.479040000                               | -3.043017000 | 0.547892000  | H         | -0.466045000                             | -2.985426000 | 1.053789000  |
| C          | -2.697626000                              | 2.244884000  | -0.109539000 | C         | -2.558276000                             | 2.127823000  | 0.159328000  |
| C          | -1.241039000                              | 2.709421000  | -0.007641000 | C         | -1.208586000                             | 2.853128000  | 0.161543000  |
| C          | -0.624164000                              | 2.726380000  | -1.426197000 | C         | -0.881228000                             | 3.211892000  | -1.308679000 |
| N          | 0.784676000                               | 3.313623000  | -1.550561000 | N         | 0.585446000                              | 3.546252000  | -1.594089000 |
| O          | -0.492399000                              | 1.986341000  | 0.932832000  | O         | -0.170208000                             | 2.123016000  | 0.760430000  |
| H          | -0.731051000                              | 1.007119000  | 0.936170000  | H         | -0.462741000                             | 1.181632000  | 1.020512000  |
| C          | 0.826083000                               | 4.716908000  | -1.029543000 | C         | 1.152871000                              | 4.446791000  | -0.529740000 |
| H          | 0.041039000                               | 5.302818000  | -1.512691000 | H         | 0.517855000                              | 5.331110000  | -0.446656000 |
| H          | 0.676214000                               | 4.702695000  | 0.049879000  | H         | 1.166697000                              | 3.893433000  | 0.408356000  |
| H          | 1.803287000                               | 5.146338000  | -1.257529000 | H         | 2.162938000                              | 4.738727000  | -0.824337000 |
| C          | 1.139009000                               | 3.299355000  | -3.019756000 | C         | 0.652079000                              | 4.240347000  | -2.924085000 |
| H          | 2.145564000                               | 3.707098000  | -3.134232000 | H         | 1.698831000                              | 4.406530000  | -3.186646000 |

|                                                           |              |             |              |                                                           |              |             |              |
|-----------------------------------------------------------|--------------|-------------|--------------|-----------------------------------------------------------|--------------|-------------|--------------|
| H                                                         | 1.110817000  | 2.258902000 | -3.361479000 | H                                                         | 0.177043000  | 3.606038000 | -3.674228000 |
| H                                                         | 0.419957000  | 3.916789000 | -3.562138000 | H                                                         | 0.126803000  | 5.194902000 | -2.858468000 |
| C                                                         | 1.816735000  | 2.473906000 | -0.820637000 | C                                                         | 1.408521000  | 2.275128000 | -1.673816000 |
| H                                                         | 1.524356000  | 2.411815000 | 0.224495000  | H                                                         | 1.312740000  | 1.764060000 | -0.720239000 |
| H                                                         | 1.825501000  | 1.482752000 | -1.286879000 | H                                                         | 1.015703000  | 1.646287000 | -2.472894000 |
| H                                                         | 2.784397000  | 2.965221000 | -0.946904000 | H                                                         | 2.443985000  | 2.550154000 | -1.885029000 |
| H                                                         | -3.066186000 | 2.064967000 | 0.907919000  | H                                                         | -2.737137000 | 1.714414000 | 1.159730000  |
| H                                                         | -3.328176000 | 2.992594000 | -0.600121000 | H                                                         | -3.371564000 | 2.815326000 | -0.101678000 |
| H                                                         | -1.254949000 | 3.332054000 | -2.084865000 | H                                                         | -1.467162000 | 4.084489000 | -1.611692000 |
| H                                                         | -0.543819000 | 1.729941000 | -1.856954000 | H                                                         | -1.133666000 | 2.377747000 | -1.962812000 |
| H                                                         | -1.292778000 | 3.743969000 | 0.362315000  | H                                                         | -1.341540000 | 3.792167000 | 0.723245000  |
| Zero-point correction= 0.447540 (Hartree/Particle)        |              |             |              | Zero-point correction= 0.447796 (Hartree/Particle)        |              |             |              |
| Thermal correction to Energy= 0.475303                    |              |             |              | Thermal correction to Energy= 0.475501                    |              |             |              |
| Thermal correction to Enthalpy= 0.476248                  |              |             |              | Thermal correction to Enthalpy= 0.476445                  |              |             |              |
| Thermal correction to Gibbs Free Energy= 0.389163         |              |             |              | Thermal correction to Gibbs Free Energy= 0.388578         |              |             |              |
| Sum of electronic and zero-point Energies= -1704.650751   |              |             |              | Sum of electronic and zero-point Energies= -1704.674502   |              |             |              |
| Sum of electronic and thermal Energies= -1704.622988      |              |             |              | Sum of electronic and thermal Energies= -1704.646798      |              |             |              |
| Sum of electronic and thermal Enthalpies= -1704.622043    |              |             |              | Sum of electronic and thermal Enthalpies= -1704.645854    |              |             |              |
| Sum of electronic and thermal Free Energies= -1704.709128 |              |             |              | Sum of electronic and thermal Free Energies= -1704.733721 |              |             |              |

| <b>TS2</b> |                                           |              |              | <b>I3</b> |                                          |              |              |
|------------|-------------------------------------------|--------------|--------------|-----------|------------------------------------------|--------------|--------------|
| 56         | 7-Me-Cl TS2 SCF Done: -1893.70354080 A.U. |              |              | 56        | 7-Me-Cl I3 SCF Done: -1893.72498732 A.U. |              |              |
| O          | -2.226349000                              | 1.256730000  | -0.814084000 | O         | -2.163060000                             | 1.344231000  | -0.554084000 |
| O          | -4.390894000                              | 3.009306000  | 0.593138000  | O         | -2.704479000                             | 0.133364000  | 2.254206000  |
| H          | -3.450938000                              | 3.353071000  | 0.694222000  | H         | -1.765443000                             | 0.458749000  | 2.145482000  |
| C          | -3.454551000                              | 0.944452000  | -0.340880000 | C         | -3.061251000                             | 0.385047000  | -0.167574000 |
| O          | -6.631609000                              | 1.132404000  | 1.004545000  | O         | -4.795315000                             | -1.854408000 | 1.819883000  |
| C          | -4.383105000                              | 1.717390000  | 0.257013000  | C         | -3.244655000                             | -0.126786000 | 1.066369000  |
| O          | -5.272252000                              | -0.429073000 | 0.073957000  | O         | -4.651851000                             | -1.296563000 | -0.370186000 |
| C          | -5.569788000                              | 0.861581000  | 0.515097000  | C         | -4.291177000                             | -1.180956000 | 0.961587000  |
| O          | -2.681517000                              | -1.129895000 | -2.420453000 | O         | -4.225324000                             | 1.372411000  | -2.798502000 |
| H          | -2.785631000                              | -1.816000000 | -3.109820000 | H         | -4.858021000                             | 1.578626000  | -3.511806000 |
| O          | -4.489377000                              | -2.916616000 | -3.286104000 | O         | -6.626719000                             | 0.444912000  | -3.671618000 |
| H          | -5.112427000                              | -2.497244000 | -3.901077000 | H         | -7.323039000                             | 0.868519000  | -3.144469000 |
| C          | -3.945219000                              | -0.465767000 | -0.464843000 | C         | -3.912682000                             | -0.354407000 | -1.164536000 |
| H          | -3.342206000                              | -1.170149000 | 0.127521000  | H         | -3.291652000                             | -0.904712000 | -1.885542000 |
| C          | -4.011736000                              | -0.987751000 | -1.905393000 | C         | -4.931167000                             | 0.484726000  | -1.943518000 |
| H          | -4.574002000                              | -0.257311000 | -2.510133000 | H         | -5.539043000                             | 1.046136000  | -1.210368000 |
| C          | -4.702725000                              | -2.353712000 | -1.984616000 | C         | -5.860322000                             | -0.389262000 | -2.793087000 |
| H          | -4.228292000                              | -3.046894000 | -1.282574000 | H         | -5.261015000                             | -1.031189000 | -3.446523000 |
| H          | -5.764387000                              | -2.271042000 | -1.731090000 | H         | -6.492734000                             | -1.022024000 | -2.161194000 |
| O          | -1.856994000                              | 3.820898000  | 1.017771000  | O         | -0.215817000                             | 1.057654000  | 1.750038000  |
| C          | -1.197799000                              | 2.103827000  | 2.416067000  | C         | 0.160997000                              | 0.189338000  | 0.897969000  |
| H          | -0.397892000                              | 1.900822000  | 1.705455000  | O         | 1.177143000                              | 0.717363000  | 0.049445000  |
| H          | -2.060145000                              | 1.469297000  | 2.205365000  | O         | -0.231460000                             | -0.955822000 | 0.712231000  |
| C          | -1.563476000                              | 3.584467000  | 2.399323000  | C         | 0.422419000                              | -0.537041000 | -1.921631000 |
| H          | -0.686654000                              | 4.179531000  | 2.678585000  | H         | -0.358153000                             | 0.222846000  | -1.950594000 |
| Cl         | -0.548858000                              | 1.548031000  | 4.082466000  | H         | 0.004235000                              | -1.493451000 | -1.625574000 |
| C          | -2.731433000                              | 3.951766000  | 3.307299000  | C         | 1.613013000                              | -0.101621000 | -1.056950000 |
| H          | -2.483029000                              | 3.754693000  | 4.354932000  | H         | 2.209507000                              | 0.596391000  | -1.655980000 |
| H          | -2.942384000                              | 5.016005000  | 3.181779000  | Cl        | 1.003379000                              | -0.751968000 | -3.698853000 |
| H          | -3.626825000                              | 3.378501000  | 3.042756000  | C         | 2.494506000                              | -1.261505000 | -0.608498000 |
| C          | -2.166983000                              | 2.362278000  | -1.727514000 | H         | 2.867367000                              | -1.802093000 | -1.484968000 |
| C          | -0.695746000                              | 2.535379000  | -2.071194000 | H         | 3.349720000                              | -0.885125000 | -0.037713000 |
| C          | -0.174146000                              | 1.268006000  | -2.821638000 | H         | 1.917858000                              | -1.942483000 | 0.020256000  |
| N          | 0.819363000                               | 0.349970000  | -2.106418000 | C         | -2.643383000                             | 2.698137000  | -0.608236000 |
| O          | 0.073161000                               | 2.793855000  | -0.916873000 | C         | -1.617440000                             | 3.609675000  | 0.078666000  |
| H          | -0.455363000                              | 3.424121000  | -0.374786000 | C         | -0.259712000                             | 3.399681000  | -0.608086000 |
| C          | 2.133967000                               | 1.057964000  | -1.886315000 | N         | 0.928085000                              | 4.189455000  | -0.044587000 |
| H          | 2.533637000                               | 1.353723000  | -2.858691000 | O         | -1.569530000                             | 3.395237000  | 1.465114000  |
| H          | 1.943614000                               | 1.933189000  | -1.268836000 | H         | -1.183220000                             | 2.493139000  | 1.609702000  |
| H          | 2.820641000                               | 0.364847000  | -1.396353000 | C         | 0.679915000                              | 5.663092000  | -0.145280000 |
| C          | 1.046637000                               | -0.836515000 | -3.003853000 | H         | 0.469346000                              | 5.920915000  | -1.185460000 |
| H          | 1.787582000                               | -1.490516000 | -2.540239000 | H         | -0.169835000                             | 5.920746000  | 0.486408000  |
| H          | 0.101157000                               | -1.367737000 | -3.121736000 | H         | 1.568608000                              | 6.196021000  | 0.198733000  |

|                                                           |              |              |              |                                                           |              |             |              |
|-----------------------------------------------------------|--------------|--------------|--------------|-----------------------------------------------------------|--------------|-------------|--------------|
| H                                                         | 1.411794000  | -0.491923000 | -3.973107000 | C                                                         | 2.126939000  | 3.812155000 | -0.875084000 |
| C                                                         | 0.280056000  | -0.166500000 | -0.789681000 | H                                                         | 2.988918000  | 4.389353000 | -0.534436000 |
| H                                                         | 0.110165000  | 0.686294000  | -0.141234000 | H                                                         | 2.300845000  | 2.745612000 | -0.731984000 |
| H                                                         | -0.661766000 | -0.674941000 | -0.990687000 | H                                                         | 1.921749000  | 4.029978000 | -1.924805000 |
| H                                                         | 1.024103000  | -0.850233000 | -0.375108000 | C                                                         | 1.243192000  | 3.830797000 | 1.398012000  |
| H                                                         | -2.537781000 | 3.285350000  | -1.281377000 | H                                                         | 0.441441000  | 4.204768000 | 2.027739000  |
| H                                                         | -2.754147000 | 2.127313000  | -2.627067000 | H                                                         | 1.279773000  | 2.744341000 | 1.484329000  |
| H                                                         | 0.337191000  | 1.554614000  | -3.744242000 | H                                                         | 2.201551000  | 4.293537000 | 1.644299000  |
| H                                                         | -1.020463000 | 0.623104000  | -3.068374000 | H                                                         | -3.585414000 | 2.785556000 | -0.058033000 |
| H                                                         | -0.630279000 | 3.379425000  | -2.773285000 | H                                                         | -2.816414000 | 2.972712000 | -1.653912000 |
| C                                                         | -1.594584000 | 5.319223000  | 0.479272000  | H                                                         | -0.326045000 | 3.682128000 | -1.663698000 |
| O                                                         | -1.547910000 | 5.239890000  | -0.747892000 | H                                                         | 0.035993000  | 2.354921000 | -0.531869000 |
| O                                                         | -1.480520000 | 6.135934000  | 1.366655000  | H                                                         | -1.966277000 | 4.641111000 | -0.069708000 |
| Zero-point correction= 0.463291 (Hartree/Particle)        |              |              |              | Zero-point correction= 0.465074 (Hartree/Particle)        |              |             |              |
| Thermal correction to Energy= 0.493735                    |              |              |              | Thermal correction to Energy= 0.495442                    |              |             |              |
| Thermal correction to Enthalpy= 0.494679                  |              |              |              | Thermal correction to Enthalpy= 0.496386                  |              |             |              |
| Thermal correction to Gibbs Free Energy= 0.400531         |              |              |              | Thermal correction to Gibbs Free Energy= 0.402536         |              |             |              |
| Sum of electronic and zero-point Energies= -1893.240250   |              |              |              | Sum of electronic and zero-point Energies= -1893.259913   |              |             |              |
| Sum of electronic and thermal Energies= -1893.209805      |              |              |              | Sum of electronic and thermal Energies= -1893.229545      |              |             |              |
| Sum of electronic and thermal Enthalpies= -1893.208861    |              |              |              | Sum of electronic and thermal Enthalpies= -1893.228601    |              |             |              |
| Sum of electronic and thermal Free Energies= -1893.303010 |              |              |              | Sum of electronic and thermal Free Energies= -1893.322451 |              |             |              |

| TS3                                       | I4                                       |
|-------------------------------------------|------------------------------------------|
| 56                                        | 56                                       |
| 7-Me-Cl TS3 SCF Done: -1893.71218575 A.U. | 7-Me-Cl I4 SCF Done: -1893.75525078 A.U. |
| O -2.178810000 0.954745000 -0.124824000   | O -2.264081000 0.994953000 0.408008000   |
| O -3.294247000 -1.004901000 1.995121000   | O -3.400896000 -1.379600000 1.897802000  |
| H -2.394686000 -0.609408000 2.176561000   | H -2.594143000 -0.932315000 2.230105000  |
| C -3.152464000 0.002381000 -0.233347000   | C -3.149400000 0.071628000 -0.048650000  |
| O -5.325214000 -2.567915000 0.554583000   | O -4.940024000 -2.886739000 -0.145440000 |
| C -3.604122000 -0.844410000 0.709979000   | C -3.596755000 -1.002264000 0.621190000  |
| O -4.739187000 -1.339186000 -1.258948000  | O -4.258488000 -1.264444000 -1.579174000 |
| C -4.644191000 -1.700247000 0.078128000   | C -4.351175000 -1.853582000 -0.331870000 |
| O -3.836823000 2.034663000 -2.305470000   | O -3.899917000 2.355865000 -1.686539000  |
| H -4.323206000 2.562046000 -2.967177000   | H -4.183038000 2.952935000 -2.404554000  |
| O -6.008854000 1.742536000 -3.916014000   | O -4.996411000 2.170170000 -4.172848000  |
| H -6.806516000 1.944804000 -3.401167000   | H -5.950572000 2.037420000 -4.051741000  |
| C -3.842660000 -0.251998000 -1.540230000  | C -3.497704000 -0.038326000 -1.502751000 |
| H -3.135907000 -0.563363000 -2.322001000  | H -2.576376000 -0.134615000 -2.092791000 |
| C -4.686414000 0.917208000 -2.064107000   | C -4.367128000 1.075792000 -2.103246000  |
| H -5.431122000 1.158949000 -1.285032000   | H -5.399529000 0.919214000 -1.745822000  |
| C -5.417044000 0.560719000 -3.361806000   | C -4.323359000 1.024723000 -3.632104000  |
| H -4.692072000 0.218476000 -4.107232000   | H -3.279977000 1.110691000 -3.952439000  |
| H -6.150887000 -0.234986000 -3.191829000  | H -4.741322000 0.081624000 -4.006484000  |
| O -0.827728000 0.074361000 2.325093000    | O -0.652965000 -0.135379000 2.387495000  |
| C -0.136139000 -0.418603000 1.404760000   | C -0.133782000 -0.565410000 1.371647000  |
| O 1.081732000 0.182194000 1.184125000     | O 0.919053000 0.003659000 0.773096000    |
| O -0.436565000 -1.352253000 0.603037000   | O -0.555601000 -1.654252000 0.724941000  |
| C 0.599830000 -0.640650000 -0.982053000   | C 0.125446000 -1.732237000 -0.554101000  |
| H -0.231882000 0.031107000 -1.082061000   | H -0.534623000 -1.335495000 -1.328676000 |
| H 0.573950000 -1.553279000 -1.559480000   | H 0.373886000 -2.778706000 -0.737178000  |
| C 1.711983000 -0.384498000 0.015604000    | C 1.347596000 -0.824407000 -0.357624000  |
| H 2.380952000 0.391537000 -0.346645000    | H 1.453538000 -0.157055000 -1.214708000  |
| Cl 1.468328000 0.620183000 -2.825502000   | Cl -0.272622000 1.001863000 -2.797742000 |
| C 2.517153000 -1.635228000 0.352208000    | C 2.633546000 -1.540114000 0.014564000   |
| H 3.051012000 -1.979267000 -0.540294000   | H 2.986887000 -2.129304000 -0.838924000  |
| H 3.250225000 -1.402134000 1.130168000    | H 3.411994000 -0.819474000 0.283021000   |
| H 1.859253000 -2.431772000 0.707377000    | H 2.474945000 -2.215886000 0.862971000   |
| C -2.585448000 2.148870000 0.554792000    | C -2.749916000 2.155696000 1.092064000   |
| C -1.376580000 3.079289000 0.656502000    | C -1.583179000 3.143094000 1.090650000   |
| C -0.685892000 3.112486000 -0.722343000   | C -1.161081000 3.331072000 -0.381559000  |
| N 0.587224000 3.956214000 -0.794176000    | N 0.176783000 4.025729000 -0.616353000   |
| O -0.494509000 2.784499000 1.714962000    | O -0.527310000 2.741638000 1.948089000   |
| H -0.575781000 1.837386000 1.992206000    | H -0.551647000 1.771814000 2.090109000   |
| C 0.438256000 5.242810000 -0.039023000    | C 0.343861000 5.216174000 0.275839000    |

|                                                           |              |             |              |                                                           |              |             |              |
|-----------------------------------------------------------|--------------|-------------|--------------|-----------------------------------------------------------|--------------|-------------|--------------|
| H                                                         | -0.457903000 | 5.759967000 | -0.388150000 | H                                                         | -0.516767000 | 5.876739000 | 0.148529000  |
| H                                                         | 0.360801000  | 5.014474000 | 1.023871000  | H                                                         | 0.411304000  | 4.871117000 | 1.307336000  |
| H                                                         | 1.318585000  | 5.859641000 | -0.229278000 | H                                                         | 1.258110000  | 5.741812000 | -0.007974000 |
| C                                                         | 0.865176000  | 4.238045000 | -2.249093000 | C                                                         | 0.204485000  | 4.448467000 | -2.065012000 |
| H                                                         | 1.824445000  | 4.754547000 | -2.324536000 | H                                                         | 1.189084000  | 4.868233000 | -2.283351000 |
| H                                                         | 0.910953000  | 3.281709000 | -2.777868000 | H                                                         | 0.017349000  | 3.556110000 | -2.673563000 |
| H                                                         | 0.066622000  | 4.868434000 | -2.645434000 | H                                                         | -0.567799000 | 5.204010000 | -2.224179000 |
| C                                                         | 1.761019000  | 3.175895000 | -0.236720000 | C                                                         | 1.316697000  | 3.052045000 | -0.399772000 |
| H                                                         | 1.477213000  | 2.791944000 | 0.741068000  | H                                                         | 1.248360000  | 2.673077000 | 0.615753000  |
| H                                                         | 1.967797000  | 2.365360000 | -0.937245000 | H                                                         | 1.186658000  | 2.247208000 | -1.128156000 |
| H                                                         | 2.615571000  | 3.853475000 | -0.174781000 | H                                                         | 2.252535000  | 3.591453000 | -0.566132000 |
| H                                                         | -2.940514000 | 1.913034000 | 1.564888000  | H                                                         | -3.019593000 | 1.903735000 | 2.125692000  |
| H                                                         | -3.383453000 | 2.630630000 | -0.020258000 | H                                                         | -3.613263000 | 2.568081000 | 0.564206000  |
| H                                                         | -1.384605000 | 3.520918000 | -1.457928000 | H                                                         | -1.919853000 | 3.935721000 | -0.883836000 |
| H                                                         | -0.390938000 | 2.122595000 | -1.061728000 | H                                                         | -1.090645000 | 2.381991000 | -0.917957000 |
| H                                                         | -1.787264000 | 4.078423000 | 0.861599000  | H                                                         | -1.954715000 | 4.096791000 | 1.489922000  |
| Zero-point correction= 0.464947 (Hartree/Particle)        |              |             |              | Zero-point correction= 0.466350 (Hartree/Particle)        |              |             |              |
| Thermal correction to Energy= 0.494505                    |              |             |              | Thermal correction to Energy= 0.496954                    |              |             |              |
| Thermal correction to Enthalpy= 0.495449                  |              |             |              | Thermal correction to Enthalpy= 0.497898                  |              |             |              |
| Thermal correction to Gibbs Free Energy= 0.405092         |              |             |              | Thermal correction to Gibbs Free Energy= 0.403810         |              |             |              |
| Sum of electronic and zero-point Energies= -1893.247239   |              |             |              | Sum of electronic and zero-point Energies= -1893.288901   |              |             |              |
| Sum of electronic and thermal Energies= -1893.217681      |              |             |              | Sum of electronic and thermal Energies= -1893.258297      |              |             |              |
| Sum of electronic and thermal Enthalpies= -1893.216737    |              |             |              | Sum of electronic and thermal Enthalpies= -1893.257353    |              |             |              |
| Sum of electronic and thermal Free Energies= -1893.307093 |              |             |              | Sum of electronic and thermal Free Energies= -1893.351441 |              |             |              |

### 7-Me-Br

| <b>I0</b> |                                          |              |              | <b>I1</b> |                                          |              |              |
|-----------|------------------------------------------|--------------|--------------|-----------|------------------------------------------|--------------|--------------|
| 43        | 7-Me-Br I0 SCF Done: -1065.19692242 A.U. |              |              | 53        | 7-Me-Br I1 SCF Done: -1258.33245308 A.U. |              |              |
| O         | -2.776409000                             | 1.749541000  | -1.578349000 | O         | -2.354503000                             | 1.072672000  | -0.190695000 |
| O         | -2.090616000                             | -1.190210000 | -1.213883000 | O         | -2.950480000                             | -1.557469000 | 1.097043000  |
| H         | -1.333588000                             | -0.555079000 | -1.236235000 | H         | -2.081420000                             | -1.103587000 | -1.103587000 |
| C         | -3.642526000                             | 0.697859000  | -1.533629000 | C         | -3.428881000                             | 0.281159000  | -0.434255000 |
| O         | -4.577127000                             | -2.641169000 | -1.559510000 | O         | -5.330482000                             | -2.611285000 | -0.327353000 |
| C         | -3.263231000                             | -0.592872000 | -1.422586000 | C         | -3.636077000                             | -0.921760000 | 0.127373000  |
| O         | -5.533951000                             | -0.613902000 | -1.875463000 | O         | -5.191224000                             | -0.711976000 | -1.562835000 |
| C         | -4.461151000                             | -1.446024000 | -1.609216000 | C         | -4.789231000                             | -1.559591000 | -0.549631000 |
| O         | -5.881691000                             | 2.878168000  | -0.989920000 | O         | -4.516520000                             | 2.871124000  | -1.571747000 |
| H         | -6.724586000                             | 3.255362000  | -0.672999000 | H         | -5.105420000                             | 3.538669000  | -1.972676000 |
| O         | -8.354426000                             | 2.036948000  | -0.366967000 | O         | -6.893026000                             | 2.955845000  | -2.866170000 |
| H         | -8.356370000                             | 1.736168000  | 0.555956000  | H         | -7.601920000                             | 2.936780000  | -2.203302000 |
| C         | -5.122769000                             | 0.763974000  | -1.851156000 | C         | -4.354226000                             | 0.465659000  | -1.605621000 |
| H         | -5.292840000                             | 1.203567000  | -2.844076000 | H         | -3.765171000                             | 0.468735000  | -2.534107000 |
| C         | -6.051578000                             | 1.475579000  | -0.855630000 | C         | -5.290958000                             | 1.675422000  | -1.581518000 |
| H         | -5.784657000                             | 1.142673000  | 0.163590000  | H         | -5.908668000                             | 1.611856000  | -0.667860000 |
| C         | -7.527469000                             | 1.139500000  | -1.119670000 | C         | -6.205911000                             | 1.698257000  | -2.810276000 |
| H         | -7.764837000                             | 1.331282000  | -2.170772000 | H         | -5.595554000                             | 1.653579000  | -3.717274000 |
| H         | -7.743441000                             | 0.090399000  | -0.897174000 | H         | -6.894498000                             | 0.846223000  | -2.803351000 |
| C         | -2.995549000                             | 2.888708000  | -0.735722000 | O         | -0.353912000                             | -0.548097000 | 0.708670000  |
| C         | -1.620741000                             | 3.451911000  | -0.356617000 | C         | -0.249849000                             | -1.056179000 | -0.657156000 |
| C         | -0.794968000                             | 3.608069000  | -1.641917000 | H         | 0.120678000                              | -0.342163000 | -1.387783000 |
| N         | 0.528865000                              | 4.374630000  | -1.523956000 | H         | -1.120994000                             | -1.616933000 | -0.987542000 |
| O         | -0.974304000                             | 2.662719000  | 0.613413000  | C         | 0.599067000                              | -1.608579000 | 0.404706000  |
| H         | -0.628765000                             | 1.845953000  | 0.182652000  | H         | 1.632530000                              | -1.263490000 | 0.456660000  |
| C         | 0.262409000                              | 5.846288000  | -1.428033000 | Br        | -1.076705000                             | 0.842453000  | -3.816518000 |
| H         | -0.284563000                             | 6.170760000  | -2.315424000 | C         | 0.309862000                              | -2.942810000 | 1.040870000  |
| H         | -0.329110000                             | 6.041743000  | -0.533023000 | H         | 0.879416000                              | -3.730744000 | 0.534758000  |
| H         | 1.213925000                              | 6.377463000  | -1.362998000 | H         | 0.596032000                              | -2.940463000 | 2.098657000  |
| C         | 1.312485000                              | 4.075076000  | -2.779037000 | H         | -0.756408000                             | -3.178595000 | 0.967017000  |
| H         | 2.238196000                              | 4.654060000  | -2.762593000 | C         | -2.477759000                             | 2.258415000  | 0.601510000  |
| H         | 1.525033000                              | 3.002765000  | -2.790587000 | C         | -1.173243000                             | 3.013081000  | 0.343022000  |
| H         | 0.709281000                              | 4.353263000  | -3.645375000 | C         | -1.116271000                             | 3.296288000  | -1.169071000 |
| C         | 1.373585000                              | 3.947102000  | -0.339435000 | N         | 0.190698000                              | 3.884268000  | -1.698238000 |

|                                              |                             |             |              |                                              |                             |             |              |
|----------------------------------------------|-----------------------------|-------------|--------------|----------------------------------------------|-----------------------------|-------------|--------------|
| H                                            | 0.840814000                 | 4.171076000 | 0.580770000  | O                                            | -0.048549000                | 2.307451000 | 0.838437000  |
| H                                            | 1.540227000                 | 2.870833000 | -0.411249000 | H                                            | -0.187341000                | 1.340035000 | 0.722792000  |
| H                                            | 2.314627000                 | 4.498723000 | -0.400189000 | C                                            | 0.672079000                 | 5.006761000 | -0.833162000 |
| H                                            | -3.513387000                | 2.605043000 | 0.184435000  | H                                            | -0.128686000                | 5.741959000 | -0.726805000 |
| H                                            | -3.607702000                | 3.628032000 | -1.262395000 | H                                            | 0.950853000                 | 4.603729000 | 0.140586000  |
| H                                            | -1.366769000                | 4.131595000 | -2.413501000 | H                                            | 1.539301000                 | 5.469803000 | -1.308431000 |
| H                                            | -0.534205000                | 2.611204000 | -1.999769000 | C                                            | -0.084524000                | 4.384060000 | -3.096346000 |
| H                                            | -1.804278000                | 4.427092000 | 0.117165000  | H                                            | 0.852467000                 | 4.745026000 | -3.525849000 |
| Br                                           | 0.786949000                 | 0.492709000 | -1.310832000 | H                                            | -0.478568000                | 3.544902000 | -3.679424000 |
|                                              |                             |             |              | H                                            | -0.811378000                | 5.196945000 | -3.041405000 |
|                                              |                             |             |              | C                                            | 1.264161000                 | 2.818363000 | -1.790874000 |
|                                              |                             |             |              | H                                            | 1.440404000                 | 2.438175000 | -0.788049000 |
|                                              |                             |             |              | H                                            | 0.889379000                 | 2.033183000 | -2.455121000 |
|                                              |                             |             |              | H                                            | 2.161744000                 | 3.282798000 | -2.205902000 |
|                                              |                             |             |              | H                                            | -2.547225000                | 1.996834000 | 1.665290000  |
|                                              |                             |             |              | H                                            | -3.348098000                | 2.843514000 | 0.293436000  |
|                                              |                             |             |              | H                                            | -1.904706000                | 4.009377000 | -1.425265000 |
|                                              |                             |             |              | H                                            | -1.285398000                | 2.388771000 | -1.755398000 |
|                                              |                             |             |              | H                                            | -1.212286000                | 3.956104000 | 0.903362000  |
| Zero-point correction=                       | 0.359515 (Hartree/Particle) |             |              | Zero-point correction=                       | 0.448888 (Hartree/Particle) |             |              |
| Thermal correction to Energy=                | 0.382666                    |             |              | Thermal correction to Energy=                | 0.477682                    |             |              |
| Thermal correction to Enthalpy=              | 0.383611                    |             |              | Thermal correction to Enthalpy=              | 0.478626                    |             |              |
| Thermal correction to Gibbs Free Energy=     | 0.304844                    |             |              | Thermal correction to Gibbs Free Energy=     | 0.387447                    |             |              |
| Sum of electronic and zero-point Energies=   | -1064.837407                |             |              | Sum of electronic and zero-point Energies=   | -1257.883565                |             |              |
| Sum of electronic and thermal Energies=      | -1064.814256                |             |              | Sum of electronic and thermal Energies=      | -1257.854771                |             |              |
| Sum of electronic and thermal Enthalpies=    | -1064.813312                |             |              | Sum of electronic and thermal Enthalpies=    | -1257.853827                |             |              |
| Sum of electronic and thermal Free Energies= | -1064.892078                |             |              | Sum of electronic and thermal Free Energies= | -1257.945006                |             |              |

| TS1 |                                           |              |              | I2 |                                          |              |              |
|-----|-------------------------------------------|--------------|--------------|----|------------------------------------------|--------------|--------------|
| 53  | 7-Me-Br TS1 SCF Done: -1258.30215417 A.U. |              |              | 53 | 7-Me-Br I2 SCF Done: -1258.32041918 A.U. |              |              |
| O   | -2.702541000                              | 1.046230000  | -0.846811000 | O  | -2.438500000                             | 1.063729000  | -0.781797000 |
| O   | -3.171108000                              | -1.592162000 | 0.747637000  | O  | -2.779704000                             | -1.517385000 | 0.847368000  |
| H   | -2.244201000                              | -1.219428000 | 0.808726000  | H  | -1.571727000                             | -0.779130000 | 1.213195000  |
| C   | -3.811943000                              | 0.250744000  | -0.770339000 | C  | -3.474545000                             | 0.145339000  | -0.786553000 |
| O   | -5.821526000                              | -2.461912000 | 0.001569000  | O  | -5.308179000                             | -2.717407000 | -0.154137000 |
| C   | -3.945036000                              | -0.907006000 | -0.086988000 | C  | -3.539720000                             | -1.003652000 | -0.051737000 |
| O   | -5.888346000                              | -0.635578000 | -1.334855000 | O  | -5.394236000                             | -0.917958000 | -1.519131000 |
| C   | -5.285531000                              | -1.469908000 | -0.413416000 | C  | -4.807973000                             | -1.684672000 | -0.515782000 |
| O   | -5.072412000                              | 2.857838000  | -1.893685000 | O  | -4.803996000                             | 2.663834000  | -1.838955000 |
| H   | -5.740295000                              | 3.544069000  | -2.084204000 | H  | -5.495065000                             | 3.320356000  | -2.047108000 |
| O   | -7.754307000                              | 3.041552000  | -2.116864000 | O  | -7.468185000                             | 2.674791000  | -2.397959000 |
| H   | -8.141629000                              | 3.177178000  | -1.237279000 | H  | -7.945529000                             | 2.693478000  | -1.552912000 |
| C   | -5.025871000                              | 0.473038000  | -1.640375000 | C  | -4.611972000                             | 0.266755000  | -1.749124000 |
| H   | -4.757715000                              | 0.431742000  | -2.705442000 | H  | -4.279676000                             | 0.269402000  | -2.800182000 |
| C   | -5.830849000                              | 1.757096000  | -1.407543000 | C  | -5.538683000                             | 1.472987000  | -1.552472000 |
| H   | -6.017341000                              | 1.858189000  | -0.323308000 | H  | -5.872767000                             | 1.468867000  | -0.499966000 |
| C   | -7.175648000                              | 1.730355000  | -2.145630000 | C  | -6.763759000                             | 1.424795000  | -2.467638000 |
| H   | -7.008044000                              | 1.504783000  | -3.203436000 | H  | -6.440736000                             | 1.329677000  | -3.509376000 |
| H   | -7.842698000                              | 0.970598000  | -1.726085000 | H  | -7.404605000                             | 0.572030000  | -2.218945000 |
| O   | -0.722353000                              | -0.599314000 | 0.922245000  | O  | -0.623795000                             | -0.352536000 | 1.392448000  |
| C   | -0.303811000                              | -0.850286000 | -0.889934000 | C  | -0.111108000                             | -1.036278000 | -0.832961000 |
| H   | -0.708217000                              | 0.081850000  | -1.217891000 | H  | -0.465619000                             | -0.044906000 | -1.095778000 |
| H   | -0.825103000                              | -1.744721000 | -1.211965000 | H  | -0.861935000                             | -1.781471000 | -1.089820000 |
| C   | 0.520202000                               | -0.920881000 | 0.315828000  | C  | 0.319690000                              | -1.105380000 | 0.636277000  |
| H   | 1.256331000                               | -0.114866000 | 0.422036000  | H  | 1.286305000                              | -0.597544000 | 0.747975000  |
| Br  | 1.193593000                               | -0.533738000 | -3.024322000 | Br | 1.457077000                              | -1.379922000 | -2.108806000 |
| C   | 1.100806000                               | -2.265368000 | 0.701195000  | C  | 0.413218000                              | -2.538328000 | 1.151155000  |
| H   | 1.955023000                               | -2.505602000 | 0.059014000  | H  | 1.125208000                              | -3.123605000 | 0.558697000  |
| H   | 1.431021000                               | -2.245890000 | 1.745099000  | H  | 0.735243000                              | -2.537140000 | 2.196847000  |
| H   | 0.343658000                               | -3.049507000 | 0.594323000  | H  | -0.576242000                             | -3.003952000 | 1.091567000  |
| C   | -2.689556000                              | 2.249544000  | -0.063304000 | C  | -2.516733000                             | 2.084042000  | 0.211874000  |
| C   | -1.241181000                              | 2.744673000  | 0.017430000  | C  | -1.179720000                             | 2.830395000  | 0.190729000  |
| C   | -0.651953000                              | 2.777375000  | -1.411954000 | C  | -0.924642000                             | 3.255854000  | -1.275646000 |
| N   | 0.763771000                               | 3.343447000  | -1.550737000 | N  | 0.526037000                              | 3.602440000  | -1.619592000 |

|                                                           |              |             |              |                                                           |              |             |              |
|-----------------------------------------------------------|--------------|-------------|--------------|-----------------------------------------------------------|--------------|-------------|--------------|
| O                                                         | -0.457031000 | 2.033341000 | 0.935780000  | O                                                         | -0.107206000 | 2.082485000 | 0.702813000  |
| H                                                         | -0.678368000 | 1.046294000 | 0.936088000  | H                                                         | -0.402683000 | 1.156641000 | 1.009108000  |
| C                                                         | 0.841974000  | 4.726527000 | -0.979249000 | C                                                         | 1.147600000  | 4.457423000 | -0.547611000 |
| H                                                         | 0.056483000  | 5.342519000 | -1.422362000 | H                                                         | 0.519505000  | 5.337761000 | -0.397134000 |
| H                                                         | 0.715601000  | 4.672261000 | 0.101823000  | H                                                         | 1.205435000  | 3.865620000 | 0.365015000  |
| H                                                         | 1.821340000  | 5.147216000 | -1.213962000 | H                                                         | 2.142757000  | 4.760885000 | -0.878965000 |
| C                                                         | 1.085679000  | 3.377867000 | -3.025826000 | C                                                         | 0.527572000  | 4.352560000 | -2.920703000 |
| H                                                         | 2.098719000  | 3.765568000 | -3.150157000 | H                                                         | 1.560216000  | 4.529275000 | -3.228348000 |
| H                                                         | 1.028264000  | 2.355636000 | -3.411335000 | H                                                         | 0.013215000  | 3.751439000 | -3.672267000 |
| H                                                         | 0.368792000  | 4.028428000 | -3.530640000 | H                                                         | 0.008952000  | 5.303743000 | -2.787859000 |
| C                                                         | 1.796393000  | 2.462139000 | -0.873295000 | C                                                         | 1.340875000  | 2.335354000 | -1.793657000 |
| H                                                         | 1.529450000  | 2.375895000 | 0.176759000  | H                                                         | 1.289622000  | 1.783585000 | -0.859288000 |
| H                                                         | 1.775682000  | 1.484166000 | -1.361566000 | H                                                         | 0.905011000  | 1.745156000 | -2.600321000 |
| H                                                         | 2.772407000  | 2.931674000 | -1.014661000 | H                                                         | 2.365604000  | 2.617538000 | -2.043940000 |
| H                                                         | -3.032205000 | 2.042683000 | 0.957949000  | H                                                         | -2.663662000 | 1.645788000 | 1.206683000  |
| H                                                         | -3.345057000 | 2.992908000 | -0.527557000 | H                                                         | -3.346701000 | 2.764253000 | -0.014530000 |
| H                                                         | -1.286018000 | 3.399632000 | -2.051500000 | H                                                         | -1.523302000 | 4.140849000 | -1.509250000 |
| H                                                         | -0.601987000 | 1.784267000 | -1.853769000 | H                                                         | -1.212430000 | 2.451248000 | -1.952073000 |
| H                                                         | -1.306134000 | 3.777364000 | 0.390446000  | H                                                         | -1.299109000 | 3.741801000 | 0.799714000  |
| Zero-point correction= 0.446914 (Hartree/Particle)        |              |             |              | Zero-point correction= 0.447078 (Hartree/Particle)        |              |             |              |
| Thermal correction to Energy= 0.474996                    |              |             |              | Thermal correction to Energy= 0.475069                    |              |             |              |
| Thermal correction to Enthalpy= 0.475941                  |              |             |              | Thermal correction to Enthalpy= 0.476013                  |              |             |              |
| Thermal correction to Gibbs Free Energy= 0.386807         |              |             |              | Thermal correction to Gibbs Free Energy= 0.386378         |              |             |              |
| Sum of electronic and zero-point Energies= -1257.855240   |              |             |              | Sum of electronic and zero-point Energies= -1257.873341   |              |             |              |
| Sum of electronic and thermal Energies= -1257.827158      |              |             |              | Sum of electronic and thermal Energies= -1257.845350      |              |             |              |
| Sum of electronic and thermal Enthalpies= -1257.826214    |              |             |              | Sum of electronic and thermal Enthalpies= -1257.844406    |              |             |              |
| Sum of electronic and thermal Free Energies= -1257.915347 |              |             |              | Sum of electronic and thermal Free Energies= -1257.934042 |              |             |              |

| <b>TS2</b> |                                           |              |              | <b>I3</b> |                                          |              |              |
|------------|-------------------------------------------|--------------|--------------|-----------|------------------------------------------|--------------|--------------|
| 56         | 7-Me-Br TS2 SCF Done: -1446.90224969 A.U. |              |              | 56        | 7-Me-Br I3 SCF Done: -1446.92371062 A.U. |              |              |
| O          | -2.228339000                              | 1.262083000  | -0.814949000 | O         | -2.162999000                             | 1.354172000  | -0.521005000 |
| O          | -4.397099000                              | 3.015098000  | 0.587610000  | O         | -2.719255000                             | 0.154173000  | 2.283804000  |
| H          | -3.457587000                              | 3.360513000  | 0.689606000  | H         | -1.777987000                             | 0.472668000  | 2.176542000  |
| C          | -3.457036000                              | 0.949824000  | -0.342630000 | C         | -3.060071000                             | 0.391955000  | -0.140115000 |
| O          | -6.635558000                              | 1.136632000  | 0.999508000  | O         | -4.809615000                             | -1.838497000 | 1.842727000  |
| C          | -4.386985000                              | 1.722739000  | 0.253311000  | C         | -3.252366000                             | -0.114481000 | 1.094260000  |
| O          | -5.273592000                              | -0.425054000 | 0.073088000  | O         | -4.644151000                             | -1.293554000 | -0.349410000 |
| C          | -5.573031000                              | 0.865850000  | 0.511639000  | C         | -4.297158000                             | -1.169939000 | 0.985577000  |
| O          | -2.680167000                              | -1.126789000 | -2.418211000 | O         | -4.163010000                             | 1.345303000  | -2.802282000 |
| H          | -2.782710000                              | -1.814770000 | -3.105972000 | H         | -4.773035000                             | 1.536949000  | -3.539020000 |
| O          | -4.483585000                              | -2.919149000 | -3.280490000 | O         | -6.538870000                             | 0.400946000  | -3.729476000 |
| H          | -5.107667000                              | -2.503016000 | -3.896612000 | H         | -7.248546000                             | 0.831539000  | -3.226334000 |
| C          | -3.945948000                              | -0.461291000 | -0.464256000 | C         | -3.891036000                             | -0.361670000 | -1.142784000 |
| H          | -3.342688000                              | -1.163639000 | 0.130262000  | H         | -3.254384000                             | -0.922515000 | -1.842086000 |
| C          | -4.010788000                              | -0.986342000 | -1.903749000 | C         | -4.890668000                             | 0.465763000  | -1.956744000 |
| H          | -4.574395000                              | -0.258297000 | -2.510136000 | H         | -5.518525000                             | 1.034839000  | -1.246794000 |
| C          | -4.698868000                              | -2.353956000 | -1.980334000 | C         | -5.794920000                             | -0.420268000 | -2.820292000 |
| H          | -4.223323000                              | -3.044570000 | -1.276524000 | H         | -5.176979000                             | -1.068979000 | -3.449229000 |
| H          | -5.760834000                              | -2.272995000 | -1.727547000 | H         | -6.442778000                             | -1.046639000 | -2.197558000 |
| O          | -1.866577000                              | 3.827173000  | 1.012811000  | O         | -0.216950000                             | 1.058985000  | 1.777061000  |
| C          | -1.215570000                              | 2.097631000  | 2.379595000  | C         | 0.147409000                              | 0.193322000  | 0.918061000  |
| H          | -0.433538000                              | 1.895149000  | 1.651426000  | O         | 1.163678000                              | 0.716185000  | 0.065532000  |
| H          | -2.085819000                              | 1.468287000  | 2.192150000  | O         | -0.256191000                             | -0.947148000 | 0.724383000  |
| C          | -1.567648000                              | 3.581164000  | 2.391559000  | C         | 0.347835000                              | -0.512586000 | -1.890556000 |
| H          | -0.686354000                              | 4.170050000  | 2.669676000  | H         | -0.447261000                             | 0.229582000  | -1.855855000 |
| Br         | -0.458357000                              | 1.437267000  | 4.150398000  | H         | -0.037094000                             | -1.495506000 | -1.642114000 |
| C          | -2.731239000                              | 3.950609000  | 3.304104000  | C         | 1.568223000                              | -0.098335000 | -1.056951000 |
| H          | -2.480952000                              | 3.760035000  | 4.352550000  | H         | 2.165738000                              | 0.598555000  | -1.654902000 |
| H          | -2.942091000                              | 5.014381000  | 3.174495000  | Br        | 0.864509000                              | -0.631623000 | -3.866548000 |
| H          | -3.627717000                              | 3.376657000  | 3.044811000  | C         | 2.442601000                              | -1.273402000 | -0.633881000 |
| C          | -2.167492000                              | 2.366213000  | -1.729525000 | H         | 2.801192000                              | -1.808662000 | -1.519783000 |
| C          | -0.695778000                              | 2.537676000  | -2.072366000 | H         | 3.308113000                              | -0.911874000 | -0.069219000 |
| C          | -0.173774000                              | 1.268342000  | -2.819201000 | H         | 1.866828000                              | -1.955579000 | -0.005801000 |
| N          | 0.818933000                               | 0.351176000  | -2.101774000 | C         | -2.646206000                             | 2.707111000  | -0.573493000 |

|                                                           |              |              |              |                                                           |              |             |              |
|-----------------------------------------------------------|--------------|--------------|--------------|-----------------------------------------------------------|--------------|-------------|--------------|
| O                                                         | 0.071926000  | 2.799493000  | -0.917850000 | C                                                         | -1.612180000 | 3.619492000 | 0.099808000  |
| H                                                         | -0.455740000 | 3.433871000  | -0.380129000 | C                                                         | -0.261737000 | 3.404265000 | -0.599687000 |
| C                                                         | 2.133465000  | 1.059078000  | -1.880663000 | N                                                         | 0.933408000  | 4.191806000 | -0.049227000 |
| H                                                         | 2.534450000  | 1.353813000  | -2.852808000 | O                                                         | -1.550503000 | 3.409639000 | 1.486541000  |
| H                                                         | 1.942869000  | 1.934924000  | -1.264198000 | H                                                         | -1.168902000 | 2.505427000 | 1.631536000  |
| H                                                         | 2.819255000  | 0.366273000  | -1.389066000 | C                                                         | 0.686529000  | 5.665983000 | -0.146003000 |
| C                                                         | 1.047180000  | -0.836221000 | -2.997913000 | H                                                         | 0.463687000  | 5.924625000 | -1.183409000 |
| H                                                         | 1.787618000  | -1.489717000 | -2.532818000 | H                                                         | -0.154986000 | 5.924545000 | 0.496244000  |
| H                                                         | 0.101832000  | -1.367575000 | -3.116244000 | H                                                         | 1.580288000  | 6.197188000 | 0.187366000  |
| H                                                         | 1.413391000  | -0.492551000 | -3.967090000 | C                                                         | 2.122175000  | 3.813146000 | -0.893456000 |
| C                                                         | 0.278237000  | -0.164435000 | -0.785313000 | H                                                         | 2.989042000  | 4.388343000 | -0.561976000 |
| H                                                         | 0.109591000  | 0.688491000  | -0.137003000 | H                                                         | 2.296271000  | 2.746273000 | -0.753206000 |
| H                                                         | -0.664262000 | -0.671529000 | -0.986470000 | H                                                         | 1.905775000  | 4.031612000 | -1.940760000 |
| H                                                         | 1.021008000  | -0.848906000 | -0.369777000 | C                                                         | 1.263607000  | 3.831047000 | 1.389493000  |
| H                                                         | -2.538597000 | 3.289757000  | -1.284593000 | H                                                         | 0.469030000  | 4.204952000 | 2.028214000  |
| H                                                         | -2.754156000 | 2.130884000  | -2.629289000 | H                                                         | 1.300696000  | 2.744573000 | 1.473963000  |
| H                                                         | 0.338299000  | 1.553055000  | -3.741963000 | H                                                         | 2.225091000  | 4.292329000 | 1.626118000  |
| H                                                         | -1.020194000 | 0.623343000  | -3.065316000 | H                                                         | -3.581291000 | 2.794251000 | -0.011416000 |
| H                                                         | -0.629113000 | 3.379666000  | -2.776864000 | H                                                         | -2.831486000 | 2.978287000 | -1.617984000 |
| C                                                         | -1.592155000 | 5.333852000  | 0.476597000  | H                                                         | -0.337344000 | 3.683210000 | -1.655554000 |
| O                                                         | -1.541950000 | 5.253738000  | -0.749154000 | H                                                         | 0.032071000  | 2.359131000 | -0.522414000 |
| O                                                         | -1.477892000 | 6.143443000  | 1.369259000  | H                                                         | -1.960463000 | 4.651047000 | -0.048388000 |
| Zero-point correction= 0.462598 (Hartree/Particle)        |              |              |              | Zero-point correction= 0.464481 (Hartree/Particle)        |              |             |              |
| Thermal correction to Energy= 0.493310                    |              |              |              | Thermal correction to Energy= 0.495075                    |              |             |              |
| Thermal correction to Enthalpy= 0.494254                  |              |              |              | Thermal correction to Enthalpy= 0.496019                  |              |             |              |
| Thermal correction to Gibbs Free Energy= 0.398627         |              |              |              | Thermal correction to Gibbs Free Energy= 0.400749         |              |             |              |
| Sum of electronic and zero-point Energies= -1446.439652   |              |              |              | Sum of electronic and zero-point Energies= -1446.459230   |              |             |              |
| Sum of electronic and thermal Energies= -1446.408940      |              |              |              | Sum of electronic and thermal Energies= -1446.428635      |              |             |              |
| Sum of electronic and thermal Enthalpies= -1446.407996    |              |              |              | Sum of electronic and thermal Enthalpies= -1446.427691    |              |             |              |
| Sum of electronic and thermal Free Energies= -1446.503623 |              |              |              | Sum of electronic and thermal Free Energies= -1446.522961 |              |             |              |

| <b>TS3</b> |                                           |              |              | <b>I4</b> |                                          |              |              |
|------------|-------------------------------------------|--------------|--------------|-----------|------------------------------------------|--------------|--------------|
| 56         | 7-Me-Br TS3 SCF Done: -1446.91350895 A.U. |              |              | 56        | 7-Me-Br I4 SCF Done: -1446.95821699 A.U. |              |              |
| O          | -2.176855000                              | 0.976206000  | -0.121333000 | O         | -2.222225000                             | 0.990086000  | 0.222947000  |
| O          | -3.297725000                              | -0.936584000 | 2.033064000  | O         | -3.363248000                             | -1.361601000 | 1.794064000  |
| H          | -2.392210000                              | -0.551106000 | 2.203455000  | H         | -2.558641000                             | -0.907432000 | 2.125216000  |
| C          | -3.145144000                              | 0.016757000  | -0.216968000 | C         | -3.116364000                             | 0.051317000  | -0.187714000 |
| O          | -5.325076000                              | -2.532411000 | 0.615740000  | O         | -4.986928000                             | -2.857614000 | -0.172086000 |
| C          | -3.602422000                              | -0.808214000 | 0.742328000  | C         | -3.568994000                             | -0.998684000 | 0.516726000  |
| O          | -4.726491000                              | -1.345033000 | -1.221518000 | O         | -4.334696000                             | -1.264561000 | -1.651213000 |
| C          | -4.639839000                              | -1.676770000 | 0.123964000  | C         | -4.382687000                             | -1.841553000 | -0.395613000 |
| O          | -3.809463000                              | 2.009742000  | -2.319087000 | O         | -3.875304000                             | 2.345564000  | -1.873644000 |
| H          | -4.281925000                              | 2.523556000  | -3.001278000 | H         | -4.256410000                             | 2.923103000  | -2.561817000 |
| O          | -5.953946000                              | 1.689843000  | -3.962760000 | O         | -5.470816000                             | 2.109069000  | -4.064995000 |
| H          | -6.760112000                              | 1.898447000  | -3.463932000 | H         | -6.386663000                             | 2.052999000  | -3.747793000 |
| C          | -3.825673000                              | -0.266627000 | -1.522251000 | C         | -3.562909000                             | -0.044675000 | -1.616309000 |
| H          | -3.114757000                              | -0.598823000 | -2.291689000 | H         | -2.696497000                             | -0.131906000 | -2.285570000 |
| C          | -4.661408000                              | 0.893971000  | -2.077195000 | C         | -4.484046000                             | 1.080041000  | -2.107615000 |
| H          | -5.419174000                              | 1.145636000  | -1.314055000 | H         | -5.427646000                             | 1.002755000  | -1.538617000 |
| C          | -5.369259000                              | 0.517593000  | -3.381709000 | C         | -4.775405000                             | 0.943135000  | -3.604246000 |
| H          | -4.631066000                              | 0.166352000  | -4.109769000 | H         | -3.829583000                             | 0.926164000  | -4.154331000 |
| H          | -6.104196000                              | -0.277404000 | -3.212477000 | H         | -5.327487000                             | 0.018713000  | -3.811737000 |
| O          | -0.810892000                              | 0.128013000  | 2.315196000  | O         | -0.727284000                             | -0.119418000 | 2.327054000  |
| C          | -0.145882000                              | -0.394906000 | 1.389612000  | C         | -0.138656000                             | -0.565404000 | 1.354542000  |
| O          | 1.062982000                               | 0.208737000  | 1.112907000  | O         | 0.943910000                              | 0.003447000  | 0.815783000  |
| O          | -0.462256000                              | -1.357299000 | 0.636047000  | O         | -0.508339000                             | -1.670400000 | 0.707993000  |
| C          | 0.571570000                               | -0.691248000 | -1.028667000 | C         | 0.256044000                              | -1.770038000 | -0.522816000 |
| H          | -0.271361000                              | -0.030263000 | -1.122119000 | H         | -0.361069000                             | -1.403295000 | -1.346559000 |
| H          | 0.518717000                               | -1.640869000 | -1.540652000 | H         | 0.525278000                              | -2.817490000 | -0.665352000 |
| C          | 1.683778000                               | -0.402571000 | -0.037295000 | C         | 1.456300000                              | -0.847738000 | -0.263599000 |
| H          | 2.358308000                               | 0.360180000  | -0.419717000 | H         | 1.625443000                              | -0.195373000 | -1.121713000 |
| Br         | 1.439071000                               | 0.483181000  | -3.066579000 | Br        | -0.024916000                             | 0.950989000  | -3.054075000 |
| C          | 2.488498000                               | -1.643220000 | 0.336706000  | C         | 2.717524000                              | -1.545187000 | 0.212279000  |
| H          | 3.018459000                               | -2.018978000 | -0.545271000 | H         | 3.133462000                              | -2.146559000 | -0.603512000 |
| H          | 3.224717000                               | -1.385176000 | 1.103686000  | H         | 3.469781000                              | -0.812759000 | 0.520142000  |

|                                                           |              |              |              |                                                           |              |              |              |
|-----------------------------------------------------------|--------------|--------------|--------------|-----------------------------------------------------------|--------------|--------------|--------------|
| H                                                         | 1.829591000  | -2.425014000 | 0.720983000  | H                                                         | 2.504207000  | -2.206439000 | 1.060072000  |
| C                                                         | -2.590218000 | 2.166396000  | 0.561598000  | C                                                         | -2.723781000 | 2.128222000  | 0.935639000  |
| C                                                         | -1.387681000 | 3.104507000  | 0.668054000  | C                                                         | -1.565085000 | 3.121190000  | 1.008046000  |
| C                                                         | -0.699343000 | 3.147933000  | -0.711481000 | C                                                         | -1.067332000 | 3.338121000  | -0.435982000 |
| N                                                         | 0.585556000  | 3.975550000  | -0.770455000 | N                                                         | 0.266779000  | 4.065171000  | -0.580251000 |
| O                                                         | -0.499721000 | 2.809543000  | 1.720332000  | O                                                         | -0.546571000 | 2.719955000  | 1.908213000  |
| H                                                         | -0.574753000 | 1.858427000  | 1.994511000  | H                                                         | -0.588434000 | 1.752557000  | 2.065256000  |
| C                                                         | 0.463704000  | 5.242473000  | 0.024468000  | C                                                         | 0.366491000  | 5.228629000  | 0.358879000  |
| H                                                         | -0.424865000 | 5.784824000  | -0.304829000 | H                                                         | -0.499143000 | 5.877682000  | 0.209384000  |
| H                                                         | 0.387186000  | 4.982759000  | 1.080015000  | H                                                         | 0.390114000  | 4.851230000  | 1.380717000  |
| H                                                         | 1.353909000  | 5.848679000  | -0.153553000 | H                                                         | 1.283125000  | 5.778856000  | 0.136650000  |
| C                                                         | 0.856828000  | 4.300349000  | -2.216823000 | C                                                         | 0.363751000  | 4.544828000  | -2.007873000 |
| H                                                         | 1.825995000  | 1.925803000  | -2.286037000 | H                                                         | 1.352094000  | 4.984439000  | -2.158721000 |
| H                                                         | 0.876663000  | 3.364850000  | -2.781682000 | H                                                         | 0.222836000  | 3.681331000  | -2.665731000 |
| H                                                         | 0.067795000  | 4.958480000  | -2.585776000 | H                                                         | -0.411040000 | 5.294955000  | -2.178761000 |
| C                                                         | 1.748757000  | 3.160347000  | -0.244402000 | C                                                         | 1.410864000  | 3.103909000  | -0.332360000 |
| H                                                         | 1.468428000  | 2.757513000  | 0.726644000  | H                                                         | 1.290286000  | 2.686598000  | 0.663395000  |
| H                                                         | 1.934670000  | 2.361119000  | -0.962405000 | H                                                         | 1.346329000  | 2.321879000  | -1.092645000 |
| H                                                         | 2.619310000  | 3.816586000  | -0.178139000 | H                                                         | 2.345094000  | 3.662770000  | -0.425711000 |
| H                                                         | -2.945247000 | 1.925803000  | 1.570413000  | H                                                         | -3.027898000 | 1.841333000  | 1.950460000  |
| H                                                         | -3.390646000 | 2.644300000  | -0.013658000 | H                                                         | -3.570219000 | 2.560064000  | 0.394868000  |
| H                                                         | -1.391987000 | 3.572371000  | -1.443362000 | H                                                         | -1.811327000 | 3.928409000  | -0.976332000 |
| H                                                         | -0.420382000 | 2.154888000  | -1.056042000 | H                                                         | -0.947149000 | 2.395878000  | -0.972536000 |
| H                                                         | -1.804065000 | 4.100367000  | 0.878097000  | H                                                         | -1.968459000 | 4.065478000  | 1.399283000  |
| Zero-point correction= 0.464423 (Hartree/Particle)        |              |              |              | Zero-point correction= 0.466082 (Hartree/Particle)        |              |              |              |
| Thermal correction to Energy= 0.494234                    |              |              |              | Thermal correction to Energy= 0.496903                    |              |              |              |
| Thermal correction to Enthalpy= 0.495178                  |              |              |              | Thermal correction to Enthalpy= 0.497847                  |              |              |              |
| Thermal correction to Gibbs Free Energy= 0.403334         |              |              |              | Thermal correction to Gibbs Free Energy= 0.402409         |              |              |              |
| Sum of electronic and zero-point Energies= -1446.449086   |              |              |              | Sum of electronic and zero-point Energies= -1446.492135   |              |              |              |
| Sum of electronic and thermal Energies= -1446.419275      |              |              |              | Sum of electronic and thermal Energies= -1446.461314      |              |              |              |
| Sum of electronic and thermal Enthalpies= -1446.418330    |              |              |              | Sum of electronic and thermal Enthalpies= -1446.460370    |              |              |              |
| Sum of electronic and thermal Free Energies= -1446.510174 |              |              |              | Sum of electronic and thermal Free Energies= -1446.555808 |              |              |              |

### 7-Me-I

| I0 |                                         |              |              | I1 |                                         |              |              |
|----|-----------------------------------------|--------------|--------------|----|-----------------------------------------|--------------|--------------|
| 43 | 7-Me-I I0 SCF Done: -1063.23179249 A.U. |              |              | 53 | 7-Me-I I1 SCF Done: -1256.37143642 A.U. |              |              |
| O  | -2.695780000                            | 1.645015000  | -1.430167000 | O  | -2.344312000                            | 1.060045000  | -0.328265000 |
| O  | -2.182010000                            | -1.320031000 | -1.272304000 | O  | -2.961947000                            | -1.510396000 | 1.127392000  |
| H  | -1.409778000                            | -0.712272000 | -1.201834000 | H  | -2.080212000                            | -1.074624000 | 1.195136000  |
| C  | -3.631849000                            | 0.657417000  | -1.498890000 | C  | -3.425573000                            | 0.255928000  | -0.495744000 |
| O  | -4.719141000                            | -2.618058000 | -1.839159000 | O  | -5.397734000                            | -2.571635000 | -0.179915000 |
| C  | -3.321931000                            | -0.655870000 | -1.475940000 | C  | -3.648184000                            | -0.907461000 | -0.137991000 |
| O  | -5.565343000                            | -0.525386000 | -2.018571000 | O  | -5.252172000                            | -0.740656000 | -1.514189000 |
| C  | -4.544904000                            | -1.430511000 | -1.780624000 | C  | -4.839319000                            | -1.546619000 | -0.471854000 |
| O  | -5.838948000                            | 2.876383000  | -0.819878000 | O  | -4.501262000                            | 2.826931000  | -1.606516000 |
| H  | -6.685990000                            | 3.238291000  | -0.495155000 | H  | -5.083896000                            | 3.505864000  | -1.997128000 |
| O  | -8.334910000                            | 2.045625000  | -0.333192000 | O  | -6.915401000                            | 2.956892000  | -2.835903000 |
| H  | -8.371396000                            | 1.672786000  | 0.562320000  | H  | -7.605918000                            | 2.952896000  | -2.153662000 |
| C  | -5.098376000                            | 0.824266000  | -1.849032000 | C  | -4.396154000                            | 0.416936000  | -1.631198000 |
| H  | -5.221789000                            | 1.364008000  | -2.798424000 | H  | -3.855182000                            | 0.381486000  | -2.587360000 |
| C  | -6.033476000                            | 1.470725000  | -0.812338000 | C  | -5.303242000                            | 1.649811000  | -1.591911000 |
| H  | -5.793875000                            | 1.046128000  | 0.178840000  | H  | -5.896891000                            | 1.602791000  | -0.661423000 |
| C  | -7.510546000                            | 1.188426000  | -1.133972000 | C  | -6.250330000                            | 1.687395000  | -2.795222000 |
| H  | -7.719319000                            | 1.464012000  | -2.172390000 | H  | -5.665796000                            | 1.629701000  | -3.718403000 |
| H  | -7.754595000                            | 0.131321000  | -0.996332000 | H  | -6.953775000                            | 0.847688000  | -2.767184000 |
| C  | -2.963380000                            | 2.840369000  | -0.690017000 | O  | -0.366811000                            | -0.556224000 | 0.698100000  |
| C  | -1.608723000                            | 3.463725000  | -0.339479000 | C  | -0.245471000                            | -1.106468000 | -0.649931000 |
| C  | -0.767492000                            | 3.555088000  | -1.621559000 | H  | 0.153430000                             | -0.419423000 | -1.391685000 |
| N  | 0.516579000                             | 4.389312000  | -1.543210000 | H  | -1.120100000                            | -1.661749000 | -0.980530000 |
| O  | -0.951093000                            | 2.763816000  | 0.690961000  | C  | 0.575667000                             | -1.641086000 | 0.442250000  |
| H  | -0.620704000                            | 1.907509000  | 0.336145000  | H  | 1.612589000                             | -1.308743000 | 0.502953000  |
| C  | 0.183105000                             | 5.850618000  | -1.527401000 | I  | -1.008992000                            | 0.756270000  | -4.099101000 |
| H  | -0.380982000                            | 6.099511000  | -2.428425000 | C  | 0.255100000                             | -2.951177000 | 1.112019000  |
| H  | -0.412781000                            | 6.070342000  | -0.641139000 | H  | 0.820548000                             | -3.761372000 | 0.637562000  |



|                                                           |              |             |              |                                                           |              |              |              |
|-----------------------------------------------------------|--------------|-------------|--------------|-----------------------------------------------------------|--------------|--------------|--------------|
| H                                                         | 1.110120000  | 6.426339000 | -1.498176000 | H                                                         | 0.525225000  | -2.922397000 | 2.173542000  |
| C                                                         | 1.320908000  | 4.062207000 | -2.778868000 | H                                                         | -0.813256000 | -3.173590000 | 1.028286000  |
| H                                                         | 2.220388000  | 4.681124000 | -2.786422000 | C                                                         | -2.434556000 | 2.192827000  | 0.542604000  |
| H                                                         | 1.581710000  | 3.000924000 | -2.737787000 | C                                                         | -1.137663000 | 2.966079000  | 0.304686000  |
| H                                                         | 0.712064000  | 4.270683000 | -3.660647000 | C                                                         | -1.078602000 | 3.293545000  | -1.198311000 |
| C                                                         | 1.370476000  | 4.062005000 | -0.334067000 | N                                                         | 0.213824000  | 3.938815000  | -1.696106000 |
| H                                                         | 0.822701000  | 4.310535000 | 0.570881000  | O                                                         | -0.001621000 | 2.266454000  | 0.780517000  |
| H                                                         | 1.583970000  | 2.991223000 | -0.347427000 | H                                                         | -0.140558000 | 1.297583000  | 0.676882000  |
| H                                                         | 2.288791000  | 4.647417000 | -0.419139000 | C                                                         | 0.656961000  | 5.044093000  | -0.788284000 |
| H                                                         | -3.493010000 | 2.619507000 | 0.240680000  | H                                                         | -0.166536000 | 5.749928000  | -0.659374000 |
| H                                                         | -3.582211000 | 3.522698000 | -1.282564000 | H                                                         | 0.945279000  | 4.615454000  | 0.171614000  |
| H                                                         | -1.347509000 | 3.988167000 | -2.441539000 | H                                                         | 1.510884000  | 5.550160000  | -1.243124000 |
| H                                                         | -0.454337000 | 2.546481000 | -1.898399000 | C                                                         | -0.064887000 | 4.482473000  | -3.076843000 |
| H                                                         | -1.824039000 | 4.462456000 | 0.065210000  | H                                                         | 0.864882000  | 4.882866000  | -3.486384000 |
| I                                                         | 1.038197000  | 0.304249000 | -1.152476000 | H                                                         | -0.432927000 | 3.657975000  | -3.696500000 |
| Zero-point correction= 0.359243 (Hartree/Particle)        |              |             |              | Zero-point correction= 0.448762 (Hartree/Particle)        |              |              |              |
| Thermal correction to Energy= 0.382588                    |              |             |              | Thermal correction to Energy= 0.477642                    |              |              |              |
| Thermal correction to Enthalpy= 0.383532                  |              |             |              | Thermal correction to Enthalpy= 0.478586                  |              |              |              |
| Thermal correction to Gibbs Free Energy= 0.303389         |              |             |              | Thermal correction to Gibbs Free Energy= 0.386528         |              |              |              |
| Sum of electronic and zero-point Energies= -1062.872549   |              |             |              | Sum of electronic and zero-point Energies= -1255.922675   |              |              |              |
| Sum of electronic and thermal Energies= -1062.849204      |              |             |              | Sum of electronic and thermal Energies= -1255.893795      |              |              |              |
| Sum of electronic and thermal Enthalpies= -1062.848260    |              |             |              | Sum of electronic and thermal Enthalpies= -1255.892850    |              |              |              |
| Sum of electronic and thermal Free Energies= -1062.928404 |              |             |              | Sum of electronic and thermal Free Energies= -1255.984908 |              |              |              |

| TS1 |                                          |              |              | I2 |                                         |              |              |
|-----|------------------------------------------|--------------|--------------|----|-----------------------------------------|--------------|--------------|
| 53  | 7-Me-I TS1 SCF Done: -1256.34167228 A.U. |              |              | 53 | 7-Me-I I2 SCF Done: -1256.35857289 A.U. |              |              |
| O   | -2.691123000                             | 1.054156000  | -0.824612000 | O  | -2.416267000                            | 1.051299000  | -0.765049000 |
| O   | -3.165218000                             | -1.553060000 | 0.820988000  | O  | -2.806279000                            | -1.475333000 | 0.939041000  |
| H   | -2.236928000                             | -1.182998000 | 0.868264000  | H  | -1.565384000                            | -0.768482000 | 1.254067000  |
| C   | -3.795757000                             | 0.252453000  | -0.744408000 | C  | -3.452198000                            | 0.133630000  | -0.765752000 |
| O   | -5.807415000                             | -2.446935000 | 0.065938000  | O  | -5.331502000                            | -2.683443000 | -0.069746000 |
| C   | -3.933450000                             | -0.890099000 | -0.037446000 | C  | -3.544499000                            | -0.987454000 | 0.007582000  |
| O   | -5.864242000                             | -0.649988000 | -1.310807000 | O  | -5.376014000                            | -0.925664000 | -1.490483000 |
| C   | -5.269495000                             | -1.462993000 | -0.365205000 | C  | -4.813352000                            | -1.668258000 | -0.454987000 |
| O   | -5.038088000                             | 2.836844000  | -1.905131000 | O  | -4.731586000                            | 2.643592000  | -1.863802000 |
| H   | -5.700858000                             | 3.521984000  | -2.116320000 | H  | -5.409508000                            | 3.306885000  | -2.092673000 |
| O   | -7.716413000                             | 3.020959000  | -2.184528000 | O  | -7.386670000                            | 2.685022000  | -2.471482000 |
| H   | -8.122304000                             | 3.163090000  | -1.314400000 | H  | -7.878395000                            | 2.719355000  | -1.635210000 |
| C   | -5.001160000                             | 0.454252000  | -1.629990000 | C  | -4.577736000                            | 0.243621000  | -1.742090000 |
| H   | -4.723126000                             | 0.393093000  | -2.691521000 | H  | -4.237230000                            | 0.217153000  | -2.790155000 |
| C   | -5.808700000                             | 1.741304000  | -1.426128000 | C  | -5.489155000                            | 1.466528000  | -1.578245000 |
| H   | -6.017277000                             | 1.851559000  | -0.346838000 | H  | -5.842264000                            | 1.479394000  | -0.532084000 |
| C   | -7.137724000                             | 1.709609000  | -2.191627000 | C  | -6.697731000                            | 1.425242000  | -2.515010000 |
| H   | -6.948180000                             | 1.476343000  | -3.244075000 | H  | -6.357149000                            | 1.314828000  | -3.549647000 |
| H   | -7.813364000                             | 0.952787000  | -1.780363000 | H  | -7.354225000                            | 0.583516000  | -2.269118000 |
| O   | -0.705012000                             | -0.566839000 | 0.928149000  | O  | -0.603629000                            | -0.361735000 | 1.408151000  |
| C   | -0.334316000                             | -0.871511000 | -0.883018000 | C  | -0.120854000                            | -1.070769000 | -0.811840000 |
| H   | -0.691772000                             | 0.072392000  | -1.233677000 | H  | -0.430035000                            | -0.064576000 | -1.075404000 |
| H   | -0.907983000                             | -1.745394000 | -1.169796000 | H  | -0.914061000                            | -1.775370000 | -1.056809000 |
| C   | 0.512695000                              | -0.949401000 | 0.307767000  | C  | 0.312371000                             | -1.153853000 | 0.657378000  |
| H   | 1.280592000                              | -0.168992000 | 0.379439000  | H  | 1.296762000                             | -0.683031000 | 0.773244000  |
| I   | 1.223790000                              | -0.687209000 | -3.240512000 | I  | 1.540526000                             | -1.527167000 | -2.246538000 |
| C   | 1.048509000                              | -2.306162000 | 0.713285000  | C  | 0.345799000                             | -2.586610000 | 1.181099000  |
| H   | 1.881445000                              | -2.593507000 | 0.062799000  | H  | 1.038038000                             | -3.205312000 | 0.599607000  |
| H   | 1.397623000                              | -2.276223000 | 1.750714000  | H  | 0.660160000                             | -2.590058000 | 2.229103000  |
| H   | 0.260013000                              | -3.062420000 | 0.636738000  | H  | -0.661100000                            | -3.012662000 | 1.118460000  |

|                                                           |              |             |              |                                                           |              |             |              |
|-----------------------------------------------------------|--------------|-------------|--------------|-----------------------------------------------------------|--------------|-------------|--------------|
| C                                                         | -2.680459000 | 2.250055000 | -0.030520000 | C                                                         | -2.487210000 | 2.056283000 | 0.243711000  |
| C                                                         | -1.237411000 | 2.762941000 | 0.032033000  | C                                                         | -1.157647000 | 2.814055000 | 0.206824000  |
| C                                                         | -0.667669000 | 2.806689000 | -1.404348000 | C                                                         | -0.950042000 | 3.280941000 | -1.253809000 |
| N                                                         | 0.748331000  | 3.370141000 | -1.551685000 | N                                                         | 0.487633000  | 3.643548000 | -1.633579000 |
| O                                                         | -0.429222000 | 2.060073000 | 0.936087000  | O                                                         | -0.066109000 | 2.055765000 | 0.661298000  |
| H                                                         | -0.640547000 | 1.070620000 | 0.936765000  | H                                                         | -0.359015000 | 1.138470000 | 0.993985000  |
| C                                                         | 0.845347000  | 4.732627000 | -0.934051000 | C                                                         | 1.139737000  | 4.470576000 | -0.557760000 |
| H                                                         | 0.052354000  | 5.366085000 | -1.337330000 | H                                                         | 0.513392000  | 5.343340000 | -0.362593000 |
| H                                                         | 0.743650000  | 4.639747000 | 0.146971000  | H                                                         | 1.228301000  | 3.853394000 | 0.335421000  |
| H                                                         | 1.820789000  | 5.157700000 | -1.176957000 | H                                                         | 2.122806000  | 4.787932000 | -0.911433000 |
| C                                                         | 1.044416000  | 3.454295000 | -3.029638000 | C                                                         | 0.445444000  | 4.430002000 | -2.912310000 |
| H                                                         | 2.059782000  | 3.833971000 | -3.159143000 | H                                                         | 1.467187000  | 4.618568000 | -3.248037000 |
| H                                                         | 0.968627000  | 2.448167000 | -3.452505000 | H                                                         | -0.091934000 | 3.848860000 | -3.663480000 |
| H                                                         | 0.326428000  | 4.130062000 | -3.498365000 | H                                                         | -0.070661000 | 5.375421000 | -2.735795000 |
| C                                                         | 1.787100000  | 2.461531000 | -0.921564000 | C                                                         | 1.300509000  | 2.385161000 | -1.868713000 |
| H                                                         | 1.534989000  | 2.341361000 | 0.128843000  | H                                                         | 1.277193000  | 1.805615000 | -0.950001000 |
| H                                                         | 1.756547000  | 1.500072000 | -1.441322000 | H                                                         | 0.842348000  | 1.819061000 | -2.680466000 |
| H                                                         | 2.763759000  | 2.929700000 | -1.062245000 | H                                                         | 2.316945000  | 2.677768000 | -2.139902000 |
| H                                                         | -3.005001000 | 2.030756000 | 0.994011000  | H                                                         | -2.613524000 | 1.602904000 | 1.234421000  |
| H                                                         | -3.350942000 | 2.989714000 | -0.479372000 | H                                                         | -3.326538000 | 2.732840000 | 0.040720000  |
| H                                                         | -1.308012000 | 3.436331000 | -2.030154000 | H                                                         | -1.558945000 | 4.169281000 | -1.443714000 |
| H                                                         | -0.628593000 | 1.816916000 | -1.855601000 | H                                                         | -1.257070000 | 2.493820000 | -1.942373000 |
| H                                                         | -1.309850000 | 3.793873000 | 0.408107000  | H                                                         | -1.264934000 | 3.707018000 | 0.845122000  |
| Zero-point correction= 0.446613 (Hartree/Particle)        |              |             |              | Zero-point correction= 0.446688 (Hartree/Particle)        |              |             |              |
| Thermal correction to Energy= 0.474820                    |              |             |              | Thermal correction to Energy= 0.474791                    |              |             |              |
| Thermal correction to Enthalpy= 0.475765                  |              |             |              | Thermal correction to Enthalpy= 0.475736                  |              |             |              |
| Thermal correction to Gibbs Free Energy= 0.385559         |              |             |              | Thermal correction to Gibbs Free Energy= 0.385237         |              |             |              |
| Sum of electronic and zero-point Energies= -1255.895059   |              |             |              | Sum of electronic and zero-point Energies= -1255.911885   |              |             |              |
| Sum of electronic and thermal Energies= -1255.866852      |              |             |              | Sum of electronic and thermal Energies= -1255.883782      |              |             |              |
| Sum of electronic and thermal Enthalpies= -1255.865908    |              |             |              | Sum of electronic and thermal Enthalpies= -1255.882837    |              |             |              |
| Sum of electronic and thermal Free Energies= -1255.956113 |              |             |              | Sum of electronic and thermal Free Energies= -1255.973336 |              |             |              |

| <b>TS2</b> |                                          |              |              | <b>I3</b> |                                         |              |              |
|------------|------------------------------------------|--------------|--------------|-----------|-----------------------------------------|--------------|--------------|
| 56         | 7-Me-I TS2 SCF Done: -1444.94049563 A.U. |              |              | 56        | 7-Me-I I3 SCF Done: -1444.96154317 A.U. |              |              |
| O          | -2.230213000                             | 1.265300000  | -0.824887000 | O         | -2.162227000                            | 1.363923000  | -0.510115000 |
| O          | -4.399922000                             | 3.019062000  | 0.578655000  | O         | -2.723466000                            | 0.164494000  | 2.292963000  |
| H          | -3.460763000                             | 3.365289000  | 0.682423000  | H         | -1.781840000                            | 0.482792000  | 2.189224000  |
| C          | -3.457753000                             | 0.953684000  | -0.349926000 | C         | -3.054500000                            | 0.396448000  | -0.132549000 |
| O          | -6.633990000                             | 1.137305000  | 0.997891000  | O         | -4.799949000                            | -1.842864000 | 1.843603000  |
| C          | -4.387994000                             | 1.726116000  | 0.246326000  | C         | -3.249443000                            | -0.109949000 | 1.101373000  |
| O          | -5.270704000                             | -0.423947000 | 0.072669000  | O         | -4.625723000                            | -1.299852000 | -0.348438000 |
| C          | -5.571829000                             | 0.867468000  | 0.508630000  | C         | -4.286874000                            | -1.172255000 | 0.988478000  |
| O          | -2.677693000                             | -1.129934000 | -2.417855000 | O         | -4.145058000                            | 1.341826000  | -2.798924000 |
| H          | -2.779357000                             | -1.820686000 | -3.102950000 | H         | -4.750048000                            | 1.529309000  | -3.540854000 |
| O          | -4.479222000                             | -2.928362000 | -3.272499000 | O         | -6.506469000                            | 0.379806000  | -3.746424000 |
| H          | -5.103751000                             | -2.514707000 | -3.889844000 | H         | -7.223159000                            | 0.804665000  | -3.248370000 |
| C          | -3.943600000                             | -0.458946000 | -0.466009000 | C         | -3.873986000                            | -0.364439000 | -1.138843000 |
| H          | -3.337881000                             | -1.157477000 | 0.130532000  | H         | -3.229204000                            | -0.922249000 | -1.833162000 |
| C          | -4.008326000                             | -0.989597000 | -1.903409000 | C         | -4.873155000                            | 0.455809000  | -1.960421000 |
| H          | -4.573351000                             | -0.264826000 | -2.512413000 | H         | -5.511174000                            | 1.019447000  | -1.255243000 |
| C          | -4.694286000                             | -2.358579000 | -1.974309000 | C         | -5.763245000                            | -0.436373000 | -2.832155000 |
| H          | -4.216992000                             | -3.045764000 | -1.268336000 | H         | -5.135097000                            | -1.079415000 | -3.456804000 |
| H          | -5.756166000                             | -2.278419000 | -1.720901000 | H         | -6.410999000                            | -1.068611000 | -2.215205000 |
| O          | -1.872372000                             | 3.832480000  | 1.008266000  | O         | -0.218016000                            | 1.067739000  | 1.787172000  |
| C          | -1.248169000                             | 2.086561000  | 2.366684000  | C         | 0.146063000                             | 0.194478000  | 0.935311000  |
| H          | -0.489640000                             | 1.872700000  | 1.617730000  | O         | 1.151419000                             | 0.716522000  | 0.068514000  |
| H          | -2.132869000                             | 1.472938000  | 2.195795000  | O         | -0.249760000                            | -0.951507000 | 0.761036000  |
| C          | -1.574309000                             | 3.577463000  | 2.386034000  | C         | 0.311806000                             | -0.498206000 | -1.882137000 |
| H          | -0.684218000                             | 4.154013000  | 2.661991000  | H         | -0.468819000                            | 0.259174000  | -1.847454000 |
| I          | -0.378316000                             | 1.313486000  | 4.269874000  | H         | -0.092319000                            | -1.466462000 | -1.606960000 |
| C          | -2.732367000                             | 3.965527000  | 3.298450000  | C         | 1.545196000                             | -0.095795000 | -1.060952000 |
| H          | -2.485973000                             | 3.778674000  | 4.348569000  | H         | 2.145312000                             | 0.602596000  | -1.654640000 |
| H          | -2.929756000                             | 5.031148000  | 3.163560000  | I         | 0.814743000                             | -0.677436000 | -4.054553000 |
| H          | -3.635811000                             | 3.401411000  | 3.041685000  | C         | 2.416453000                             | -1.276789000 | -0.646778000 |
| C          | -2.167167000                             | 2.372701000  | -1.734966000 | H         | 2.776032000                             | -1.807123000 | -1.535162000 |

|                                                           |              |              |              |                                                           |              |              |              |
|-----------------------------------------------------------|--------------|--------------|--------------|-----------------------------------------------------------|--------------|--------------|--------------|
| C                                                         | -0.694607000 | 2.542123000  | -2.075295000 | H                                                         | 3.281847000  | -0.920268000 | -0.078762000 |
| C                                                         | -0.174017000 | 1.270914000  | -2.820193000 | H                                                         | 1.839084000  | -1.961815000 | -0.023598000 |
| N                                                         | 0.819275000  | 0.354904000  | -2.102084000 | C                                                         | -2.649262000 | 2.715520000  | -0.557813000 |
| O                                                         | 0.071359000  | 2.802874000  | -0.919353000 | C                                                         | -1.612504000 | 3.628068000  | 0.111136000  |
| H                                                         | -0.456243000 | 3.437867000  | -0.382401000 | C                                                         | -0.264300000 | 3.408790000  | -0.591562000 |
| C                                                         | 2.133919000  | 1.063180000  | -1.883039000 | N                                                         | 0.934244000  | 4.194158000  | -0.045634000 |
| H                                                         | 2.534270000  | 1.356282000  | -2.855943000 | O                                                         | -1.547155000 | 3.419781000  | 1.497895000  |
| H                                                         | 1.943779000  | 1.939997000  | -1.267788000 | H                                                         | -1.166276000 | 2.515089000  | 1.642480000  |
| H                                                         | 2.820042000  | 0.371269000  | -1.390653000 | C                                                         | 0.691978000  | 5.668802000  | -0.146004000 |
| C                                                         | 1.046651000  | -0.833906000 | -2.996586000 | H                                                         | 0.468898000  | 5.925415000  | -1.183864000 |
| H                                                         | 1.787482000  | -1.486694000 | -2.531128000 | H                                                         | -0.148133000 | 5.931638000  | 0.496360000  |
| H                                                         | 0.101110000  | -1.365314000 | -3.113145000 | H                                                         | 1.587701000  | 6.198111000  | 0.185119000  |
| H                                                         | 1.411983000  | -0.491778000 | -3.966640000 | C                                                         | 2.120092000  | 3.808985000  | -0.891057000 |
| C                                                         | 0.279790000  | -0.158880000 | -0.784348000 | H                                                         | 2.989294000  | 4.383074000  | -0.563793000 |
| H                                                         | 0.113159000  | 0.694953000  | -0.136860000 | H                                                         | 2.291409000  | 2.742162000  | -0.746892000 |
| H                                                         | -0.663432000 | -0.665321000 | -0.983670000 | H                                                         | 1.901939000  | 4.023913000  | -1.938736000 |
| H                                                         | 1.022446000  | -0.843517000 | -0.368925000 | C                                                         | 1.266244000  | 3.836046000  | 1.393322000  |
| H                                                         | -2.537318000 | 3.295260000  | -1.287258000 | H                                                         | 0.475204000  | 4.215763000  | 2.032986000  |
| H                                                         | -2.753249000 | 2.141640000  | -2.636251000 | H                                                         | 1.297882000  | 2.749588000  | 1.480887000  |
| H                                                         | 0.336870000  | 1.553518000  | -3.744259000 | H                                                         | 2.230623000  | 4.293200000  | 1.626180000  |
| H                                                         | -1.020850000 | 0.625507000  | -3.063757000 | H                                                         | -3.581120000 | 2.799822000  | 0.010070000  |
| H                                                         | -0.624826000 | 3.383739000  | -2.779900000 | H                                                         | -2.840907000 | 2.987633000  | -1.600969000 |
| C                                                         | -1.587359000 | 5.339447000  | 0.476139000  | H                                                         | -0.341840000 | 3.685831000  | -1.647811000 |
| O                                                         | -1.536428000 | 5.261517000  | -0.749572000 | H                                                         | 0.027051000  | 2.363019000  | -0.512425000 |
| O                                                         | -1.468160000 | 6.145766000  | 1.371103000  | H                                                         | -1.959646000 | 4.659934000  | -0.037528000 |
| Zero-point correction= 0.462170 (Hartree/Particle)        |              |              |              | Zero-point correction= 0.464056 (Hartree/Particle)        |              |              |              |
| Thermal correction to Energy= 0.493011                    |              |              |              | Thermal correction to Energy= 0.494778                    |              |              |              |
| Thermal correction to Enthalpy= 0.493956                  |              |              |              | Thermal correction to Enthalpy= 0.495722                  |              |              |              |
| Thermal correction to Gibbs Free Energy= 0.397402         |              |              |              | Thermal correction to Gibbs Free Energy= 0.399527         |              |              |              |
| Sum of electronic and zero-point Energies= -1444.478325   |              |              |              | Sum of electronic and zero-point Energies= -1444.497487   |              |              |              |
| Sum of electronic and thermal Energies= -1444.447484      |              |              |              | Sum of electronic and thermal Energies= -1444.466765      |              |              |              |
| Sum of electronic and thermal Enthalpies= -1444.446540    |              |              |              | Sum of electronic and thermal Enthalpies= -1444.465821    |              |              |              |
| Sum of electronic and thermal Free Energies= -1444.543094 |              |              |              | Sum of electronic and thermal Free Energies= -1444.562016 |              |              |              |
| <b>TS3</b>                                                |              |              |              | <b>I4</b>                                                 |              |              |              |
| 56                                                        |              |              |              | 56                                                        |              |              |              |
| 7-Me-I TS3 SCF Done: -1444.95156612 A.U.                  |              |              |              | 7-Me-I I4 SCF Done: -1444.99662988 A.U.                   |              |              |              |
| O                                                         | -2.169556000 | 0.986530000  | -0.116886000 | O                                                         | -2.203134000 | 0.978055000  | 0.159323000  |
| O                                                         | -3.300819000 | -0.903696000 | 2.050955000  | O                                                         | -3.377434000 | -1.318331000 | 1.810250000  |
| H                                                         | -2.394195000 | -0.522129000 | 2.220934000  | H                                                         | -2.558972000 | -0.878348000 | 2.126455000  |
| C                                                         | -3.134718000 | 0.023441000  | -0.208804000 | C                                                         | -3.113374000 | 0.036486000  | -0.212392000 |
| O                                                         | -5.316650000 | -2.519329000 | 0.636987000  | O                                                         | -5.062704000 | -2.817305000 | -0.094019000 |
| C                                                         | -3.597515000 | -0.791236000 | 0.756413000  | C                                                         | -3.584227000 | -0.981998000 | 0.525873000  |
| O                                                         | -4.706958000 | -1.351161000 | -1.209126000 | O                                                         | -4.395574000 | -1.277501000 | -1.622280000 |
| C                                                         | -4.629349000 | -1.668094000 | 0.140554000  | C                                                         | -4.436027000 | -1.823715000 | -0.352980000 |
| O                                                         | -3.793858000 | 2.000587000  | -2.319755000 | O                                                         | -3.862411000 | 2.318981000  | -1.896182000 |
| H                                                         | -4.260368000 | 2.508154000  | -3.010669000 | H                                                         | -4.232853000 | 2.897453000  | -2.589414000 |
| O                                                         | -5.919200000 | 1.662759000  | -3.985398000 | O                                                         | -5.487683000 | 2.100340000  | -4.068030000 |
| H                                                         | -6.731583000 | 1.868700000  | -3.495628000 | H                                                         | -6.400464000 | 2.064527000  | -3.739246000 |
| C                                                         | -3.806908000 | -0.273612000 | -1.515118000 | C                                                         | -3.594725000 | -0.077017000 | -1.628006000 |
| H                                                         | -3.091475000 | -0.611284000 | -2.277954000 | H                                                         | -2.749671000 | -0.200024000 | -2.318161000 |
| C                                                         | -4.642246000 | 0.880944000  | -2.083492000 | C                                                         | -4.498330000 | 1.064321000  | -2.116171000 |
| H                                                         | -5.409333000 | 1.131040000  | -1.329209000 | H                                                         | -5.436099000 | 1.008479000  | -1.535234000 |
| C                                                         | -5.333935000 | 0.496022000  | -3.394112000 | C                                                         | -4.809453000 | 0.924205000  | -3.608633000 |
| H                                                         | -4.585997000 | 0.146632000  | -4.113058000 | H                                                         | -3.870546000 | 0.886229000  | -4.169465000 |
| H                                                         | -6.066000000 | -0.302719000 | -3.229783000 | H                                                         | -5.381328000 | 0.009074000  | -3.803970000 |
| O                                                         | -0.803810000 | 0.157461000  | 2.320566000  | O                                                         | -0.746146000 | -0.112083000 | 2.312617000  |
| C                                                         | -0.153120000 | -0.386609000 | 1.396263000  | C                                                         | -0.148848000 | -0.571569000 | 1.350978000  |
| O                                                         | 1.046160000  | 0.216660000  | 1.078973000  | O                                                         | 0.934307000  | -0.006470000 | 0.811132000  |
| O                                                         | -0.478076000 | -1.372429000 | 0.679352000  | O                                                         | -0.509283000 | -1.688688000 | 0.721733000  |
| C                                                         | 0.536118000  | -0.755296000 | -1.030868000 | C                                                         | 0.268819000  | -1.811024000 | -0.498148000 |
| H                                                         | -0.306001000 | -0.094523000 | -1.139670000 | H                                                         | -0.344409000 | -1.471878000 | -1.336954000 |
| H                                                         | 0.470407000  | -1.728742000 | -1.493585000 | H                                                         | 0.546998000  | -2.859279000 | -0.614506000 |
| C                                                         | 1.657246000  | -0.424255000 | -0.061380000 | C                                                         | 1.460531000  | -0.874574000 | -0.248121000 |
| H                                                         | 2.320836000  | 0.335140000  | -0.469175000 | H                                                         | 1.634489000  | -0.236140000 | -1.116341000 |

|                                                           |              |              |              |                                                           |              |              |              |
|-----------------------------------------------------------|--------------|--------------|--------------|-----------------------------------------------------------|--------------|--------------|--------------|
| I                                                         | 1.421995000  | 0.385754000  | -3.318895000 | I                                                         | 0.039742000  | 0.913667000  | -3.356324000 |
| C                                                         | 2.477912000  | -1.645800000 | 0.339091000  | C                                                         | 2.723960000  | -1.553447000 | 0.247390000  |
| H                                                         | 3.001244000  | -2.042889000 | -0.537453000 | H                                                         | 3.148806000  | -2.165587000 | -0.555619000 |
| H                                                         | 3.220135000  | -1.359262000 | 1.089945000  | H                                                         | 3.468658000  | -0.809545000 | 0.545718000  |
| H                                                         | 1.829795000  | -2.421367000 | 0.753236000  | H                                                         | 2.510947000  | -2.201124000 | 1.105626000  |
| C                                                         | -2.587938000 | 2.173972000  | 0.568279000  | C                                                         | -2.695545000 | 2.099140000  | 0.905695000  |
| C                                                         | -1.391011000 | 3.118672000  | 0.675117000  | C                                                         | -1.545584000 | 3.100361000  | 0.990634000  |
| C                                                         | -0.710511000 | 3.176909000  | -0.707762000 | C                                                         | -1.047523000 | 3.347811000  | -0.448174000 |
| N                                                         | 0.580448000  | 3.996342000  | -0.759151000 | N                                                         | 0.276247000  | 4.099037000  | -0.570397000 |
| O                                                         | -0.493845000 | 2.821029000  | 1.718238000  | O                                                         | -0.518551000 | 2.699829000  | 1.880730000  |
| H                                                         | -0.569675000 | 1.869569000  | 1.995028000  | H                                                         | -0.574930000 | 1.737036000  | 2.060541000  |
| C                                                         | 0.477982000  | 5.244373000  | 0.069213000  | C                                                         | 0.362164000  | 5.233442000  | 0.406520000  |
| H                                                         | -0.407528000 | 5.803406000  | -0.239617000 | H                                                         | -0.512701000 | 5.874703000  | 5.874703000  |
| H                                                         | 0.406915000  | 4.958394000  | 1.118207000  | H                                                         | 0.394040000  | 4.824279000  | 1.415666000  |
| H                                                         | 1.372860000  | 5.845715000  | -0.101708000 | H                                                         | 1.270225000  | 5.802981000  | 0.198624000  |
| C                                                         | 0.840466000  | 4.358651000  | -2.198233000 | C                                                         | 0.366849000  | 4.630848000  | -1.979621000 |
| H                                                         | 1.814088000  | 4.848617000  | -2.264440000 | H                                                         | 1.350746000  | 5.084598000  | -2.116230000 |
| H                                                         | 0.844223000  | 3.440353000  | -2.790955000 | H                                                         | 0.234111000  | 3.792892000  | -2.670957000 |
| H                                                         | 0.054578000  | 5.034506000  | -2.540777000 | H                                                         | -0.415669000 | 5.378598000  | -2.123088000 |
| C                                                         | 1.740328000  | 3.157389000  | -0.264806000 | C                                                         | 1.432076000  | 3.144370000  | -0.353085000 |
| H                                                         | 1.465885000  | 2.733832000  | 0.699073000  | H                                                         | 1.309728000  | 2.685498000  | 0.624327000  |
| H                                                         | 1.912075000  | 2.372739000  | -1.002627000 | H                                                         | 1.387426000  | 2.391821000  | -1.144418000 |
| H                                                         | 2.618997000  | 3.801987000  | -0.192453000 | H                                                         | 2.359583000  | 3.718069000  | -0.417320000 |
| H                                                         | -2.940838000 | 1.930027000  | 1.576959000  | H                                                         | -2.988536000 | 1.788295000  | 1.916702000  |
| H                                                         | -3.391619000 | 2.647974000  | -0.005757000 | H                                                         | -3.550204000 | 2.539001000  | 0.384387000  |
| H                                                         | -1.403280000 | 3.616588000  | -1.430303000 | H                                                         | -1.798851000 | 3.933771000  | -0.982861000 |
| H                                                         | -0.441875000 | 2.185383000  | -1.066127000 | H                                                         | -0.910719000 | 2.415687000  | -0.997806000 |
| H                                                         | -1.812451000 | 4.110637000  | 0.894204000  | H                                                         | -1.961485000 | 4.034503000  | 1.393721000  |
| Zero-point correction= 0.464067 (Hartree/Particle)        |              |              |              | Zero-point correction= 0.465958 (Hartree/Particle)        |              |              |              |
| Thermal correction to Energy= 0.493988                    |              |              |              | Thermal correction to Energy= 0.496843                    |              |              |              |
| Thermal correction to Enthalpy= 0.494932                  |              |              |              | Thermal correction to Enthalpy= 0.497787                  |              |              |              |
| Thermal correction to Gibbs Free Energy= 0.402217         |              |              |              | Thermal correction to Gibbs Free Energy= 0.401632         |              |              |              |
| Sum of electronic and zero-point Energies= -1444.487499   |              |              |              | Sum of electronic and zero-point Energies= -1444.530672   |              |              |              |
| Sum of electronic and thermal Energies= -1444.457578      |              |              |              | Sum of electronic and thermal Energies= -1444.499787      |              |              |              |
| Sum of electronic and thermal Enthalpies= -1444.456634    |              |              |              | Sum of electronic and thermal Enthalpies= -1444.498842    |              |              |              |
| Sum of electronic and thermal Free Energies= -1444.549349 |              |              |              | Sum of electronic and thermal Free Energies= -1444.594998 |              |              |              |

### 7-Me-I dimeric

| <b>I0</b> |                                        |              |              | <b>I1</b> |                                        |              |              |
|-----------|----------------------------------------|--------------|--------------|-----------|----------------------------------------|--------------|--------------|
| 86        | Dimer I0 SCF Done: -2126.54635114 A.U. |              |              | 96        | Dimer I1 SCF Done: -2319.69218944 A.U. |              |              |
| O         | -2.986011000                           | 1.412160000  | 0.671919000  | O         | -2.811778000                           | 1.308507000  | 1.473300000  |
| O         | -3.943974000                           | -0.915440000 | 2.422992000  | O         | -4.300243000                           | -0.695619000 | 3.207428000  |
| H         | -2.969515000                           | -0.772202000 | 2.432700000  | H         | -3.467519000                           | -0.273929000 | 3.540494000  |
| C         | -4.115898000                           | 0.672465000  | 0.545151000  | C         | -3.949200000                           | 0.629883000  | 1.163783000  |
| O         | -6.531420000                           | -1.684164000 | 1.318925000  | O         | -6.578416000                           | -1.586405000 | 1.623287000  |
| C         | -4.494142000                           | -0.350544000 | 1.335711000  | C         | -4.558699000                           | -0.272579000 | 1.958125000  |
| O         | -6.162485000                           | -0.098357000 | -0.239814000 | O         | -5.799573000                           | -0.201693000 | 0.022951000  |
| C         | -5.807458000                           | -0.826621000 | 0.855267000  | C         | -5.741025000                           | -0.792401000 | 1.247659000  |
| O         | -4.880200000                           | 3.186615000  | -1.100431000 | O         | -4.357442000                           | 2.915110000  | -1.081418000 |
| H         | -5.440749000                           | 3.949062000  | -1.350360000 | H         | -4.876514000                           | 3.655662000  | -1.456125000 |
| O         | -7.482540000                           | 3.740994000  | -1.392758000 | O         | -6.937168000                           | 3.477936000  | -1.563574000 |
| H         | -7.814360000                           | 4.008516000  | -0.512866000 | H         | -7.331427000                           | 3.855546000  | -0.752440000 |
| C         | -5.152635000                           | 0.895171000  | -0.528709000 | C         | -4.727217000                           | 0.758695000  | -0.130805000 |
| H         | -4.758680000                           | 0.705134000  | -1.534124000 | H         | -4.134234000                           | 0.467522000  | -1.005358000 |
| C         | -5.803418000                           | 2.283173000  | -0.512525000 | C         | -5.340657000                           | 2.143699000  | -0.401279000 |
| H         | -6.001203000                           | 2.561526000  | 0.533580000  | H         | -5.594576000                           | 2.615003000  | 0.558132000  |
| C         | -7.130559000                           | 2.366414000  | -1.279430000 | C         | -6.618781000                           | 2.126475000  | -1.251811000 |
| H         | -6.995243000                           | 1.987120000  | -2.298289000 | H         | -6.432565000                           | 1.610996000  | -2.199865000 |
| H         | -7.907294000                           | 1.779134000  | -0.778828000 | H         | -7.434217000                           | 1.621874000  | -0.724520000 |
| I         | -0.222439000                           | -0.777860000 | 2.540864000  | O         | -1.855653000                           | 0.061470000  | 4.052594000  |
| C         | -3.155844000                           | 2.704094000  | 1.299426000  | C         | -1.068010000                           | -0.988930000 | 3.410952000  |
| C         | -1.928011000                           | 2.967252000  | 2.155771000  | H         | -0.120684000                           | -0.635204000 | 3.012404000  |
| C         | -0.671240000                           | 2.826201000  | 1.297599000  | H         | -1.666485000                           | -1.642028000 | 2.778232000  |

|   |              |              |             |   |              |              |              |
|---|--------------|--------------|-------------|---|--------------|--------------|--------------|
| N | 0.605809000  | 3.419577000  | 1.897086000 | C | -1.260528000 | -1.018654000 | 4.862756000  |
| O | -1.893736000 | 2.097451000  | 3.282800000 | H | -0.428566000 | -0.640145000 | 5.455322000  |
| H | -1.580832000 | 1.191968000  | 3.020301000 | I | 1.696977000  | 1.440430000  | 4.423266000  |
| C | 0.585539000  | 4.920382000  | 1.767828000 | C | -2.250820000 | -1.915628000 | 5.552410000  |
| H | 0.524729000  | 5.180925000  | 0.709614000 | H | -1.735792000 | -2.793336000 | 5.958521000  |
| H | -0.278183000 | 5.325606000  | 2.302016000 | H | -2.718068000 | -1.372950000 | 6.381092000  |
| H | 1.507555000  | 5.318141000  | 2.196617000 | H | -3.033670000 | -2.250772000 | 4.865427000  |
| C | 1.761217000  | 2.848186000  | 1.116178000 | C | -2.983122000 | 2.740505000  | 1.629189000  |
| H | 2.686937000  | 3.307474000  | 1.468298000 | C | -1.789632000 | 3.335485000  | 2.348670000  |
| H | 1.781316000  | 1.767412000  | 1.276784000 | C | -0.476206000 | 3.170629000  | 1.574647000  |
| H | 1.612703000  | 3.069361000  | 0.057719000 | N | 0.448744000  | 4.388043000  | 1.658720000  |
| C | 0.793501000  | 3.051845000  | 3.351158000 | O | -1.657819000 | 2.874976000  | 3.684727000  |
| H | 0.013200000  | 3.527765000  | 3.941222000 | H | -1.325346000 | 1.954296000  | 3.683979000  |
| H | 0.731379000  | 1.966318000  | 3.447702000 | C | -0.099152000 | 5.513237000  | 0.821486000  |
| H | 1.777579000  | 3.415900000  | 3.654551000 | H | -0.214885000 | 5.165605000  | -0.207074000 |
| H | -4.035167000 | 2.691644000  | 1.949021000 | H | -1.056900000 | 5.839671000  | 1.233020000  |
| H | -3.301993000 | 3.466780000  | 0.530975000 | H | 0.606373000  | 6.345150000  | 0.859001000  |
| H | -0.805656000 | 3.326679000  | 0.335624000 | C | 1.796695000  | 3.963316000  | 1.135758000  |
| H | -0.475425000 | 1.766507000  | 1.123335000 | H | 2.455789000  | 4.833204000  | 1.119894000  |
| H | -2.033065000 | 3.982772000  | 2.553142000 | H | 2.195242000  | 3.194844000  | 1.803958000  |
| O | -5.586223000 | 3.290679000  | 5.211935000 | H | 1.673464000  | 3.569507000  | 0.124703000  |
| O | -5.949073000 | 4.842412000  | 2.477749000 | C | 0.619197000  | 4.874917000  | 3.081579000  |
| H | -5.232025000 | 5.196325000  | 3.046796000 | H | -0.328281000 | 5.284582000  | 3.433354000  |
| C | -6.477006000 | 3.130005000  | 4.199010000 | H | 0.948987000  | 4.030911000  | 3.690549000  |
| O | -8.301433000 | 3.639506000  | 1.301736000 | H | 1.375990000  | 5.662118000  | 3.067817000  |
| C | -6.619515000 | 3.828967000  | 3.053716000 | H | -3.873743000 | 2.934963000  | 2.231095000  |
| O | -8.310402000 | 2.248258000  | 3.075342000 | H | -3.121946000 | 3.206595000  | 0.649894000  |
| C | -7.802166000 | 3.283211000  | 2.347191000 | H | -0.649601000 | 3.005354000  | 0.508332000  |
| O | -5.926102000 | 0.399929000  | 5.108522000 | H | 0.094805000  | 2.331917000  | 1.981004000  |
| H | -5.785940000 | -0.569334000 | 5.079341000 | H | -2.050371000 | 4.395140000  | 2.445579000  |
| O | -7.077687000 | -1.755638000 | 4.052434000 | O | -5.575572000 | 3.159780000  | 5.146933000  |
| H | -6.709234000 | -1.948047000 | 3.164656000 | O | -5.632988000 | 4.650931000  | 2.416840000  |
| C | -7.470185000 | 1.999705000  | 4.221357000 | H | -5.001561000 | 5.047501000  | 3.063194000  |
| H | -8.093950000 | 1.995428000  | 5.122066000 | C | -6.469890000 | 3.059878000  | 4.124153000  |
| C | -6.806801000 | 0.627657000  | 4.023354000 | O | -7.991024000 | 3.681516000  | 1.071145000  |
| H | -6.246822000 | 0.688555000  | 3.076037000 | C | -6.468518000 | 3.758441000  | 2.970080000  |
| C | -7.803100000 | -0.539741000 | 3.941012000 | O | -8.358445000 | 2.434526000  | 2.911344000  |
| H | -8.484579000 | -0.495938000 | 4.799139000 | C | -7.651435000 | 3.342568000  | 2.184612000  |
| H | -8.388975000 | -0.485682000 | 3.016611000 | O | -6.986517000 | 0.302856000  | 5.500376000  |
| I | -2.738764000 | 6.488536000  | 3.688650000 | H | -7.077553000 | -0.671590000 | 5.510122000  |
| C | -4.240752000 | 2.896577000  | 4.885265000 | O | -8.126015000 | -1.605254000 | 4.000715000  |
| C | -3.417501000 | 2.980228000  | 6.169421000 | H | -7.503356000 | -1.848998000 | 3.286247000  |
| C | -3.625101000 | 4.384697000  | 6.756969000 | C | -7.678763000 | 2.148072000  | 4.154572000  |
| N | -2.640690000 | 4.802607000  | 7.850451000 | H | -8.356345000 | 2.383226000  | 4.983477000  |
| O | -2.048069000 | 2.722404000  | 5.915701000 | C | -7.358915000 | 0.648398000  | 4.174080000  |
| H | -1.935634000 | 2.436548000  | 4.978214000 | H | -6.521342000 | 0.476187000  | 3.485346000  |
| C | -2.430839000 | 3.693433000  | 8.841853000 | C | -8.516763000 | -0.261037000 | 3.741011000  |
| H | -3.402192000 | 3.378134000  | 9.227805000 | H | -9.400576000 | -0.059109000 | 4.356054000  |
| H | -1.937809000 | 2.865189000  | 8.333703000 | H | -8.769749000 | -0.099923000 | 2.688090000  |
| H | -1.806998000 | 4.065951000  | 9.657002000 | I | -2.971513000 | 6.679570000  | 3.689778000  |
| C | -3.224930000 | 6.003556000  | 8.542557000 | C | -4.576470000 | 2.116517000  | 5.204283000  |
| H | -2.508164000 | 6.373135000  | 9.278704000 | C | -3.665938000 | 2.388892000  | 6.400880000  |
| H | -3.422871000 | 6.770998000  | 7.792029000 | C | -3.128902000 | 3.825191000  | 6.319249000  |
| H | -4.153886000 | 5.714193000  | 9.036906000 | N | -1.954720000 | 4.147467000  | 7.244898000  |
| C | -1.311176000 | 5.206977000  | 7.247792000 | O | -2.656560000 | 1.390564000  | 6.454606000  |
| H | -0.900652000 | 4.335649000  | 6.745629000 | H | -2.270731000 | 1.281538000  | 5.567278000  |
| H | -1.492130000 | 5.997997000  | 6.516680000 | C | -2.155118000 | 3.567650000  | 8.614774000  |
| H | -0.665395000 | 5.554545000  | 8.057469000 | H | -3.115606000 | 3.909598000  | 9.005647000  |
| H | -3.823174000 | 3.587907000  | 4.147763000 | H | -2.134576000 | 2.481353000  | 8.541459000  |
| H | -4.231230000 | 1.873941000  | 4.505614000 | H | -1.346177000 | 3.916952000  | 9.259442000  |
| H | -4.622937000 | 4.437568000  | 7.196001000 | C | -1.861723000 | 5.649708000  | 7.345828000  |
| H | -3.535336000 | 5.144795000  | 5.976772000 | H | -0.968372000 | 5.905569000  | 7.919101000  |
| H | -3.805939000 | 2.227625000  | 6.870018000 | H | -1.817556000 | 6.067948000  | 6.337248000  |
|   |              |              |             | H | -2.753707000 | 6.024922000  | 7.850506000  |
|   |              |              |             | C | -0.654219000 | 3.626427000  | 6.662678000  |
|   |              |              |             | H | -0.674736000 | 2.541772000  | 6.653226000  |
|   |              |              |             | H | -0.562874000 | 3.990072000  | 5.642125000  |

|                                              |   |                             |             |                             |
|----------------------------------------------|---|-----------------------------|-------------|-----------------------------|
|                                              | H | 0.168848000                 | 3.985416000 | 7.282682000                 |
|                                              | H | -3.973942000                | 2.138093000 | 4.290124000                 |
|                                              | H | -5.045281000                | 1.139517000 | 5.329615000                 |
|                                              | H | -3.934038000                | 4.517000000 | 6.571867000                 |
|                                              | H | -2.787880000                | 4.064485000 | 5.313886000                 |
|                                              | H | -4.247790000                | 2.264687000 | 7.319803000                 |
| Zero-point correction=                       |   | 0.723947 (Hartree/Particle) |             | 0.813625 (Hartree/Particle) |
| Thermal correction to Energy=                |   | 0.771068                    |             | 0.866353                    |
| Thermal correction to Enthalpy=              |   | 0.772013                    |             | 0.867297                    |
| Thermal correction to Gibbs Free Energy=     |   | 0.638767                    |             | 0.725055                    |
| Sum of electronic and zero-point Energies=   |   | -2125.822404                |             | -2318.878565                |
| Sum of electronic and thermal Energies=      |   | -2125.775283                |             | -2318.825837                |
| Sum of electronic and thermal Enthalpies=    |   | -2125.774339                |             | -2318.824893                |
| Sum of electronic and thermal Free Energies= |   | -2125.907584                |             | -2318.967134                |

| TS1                                     |              |              |              | I2                                     |              |              |              |
|-----------------------------------------|--------------|--------------|--------------|----------------------------------------|--------------|--------------|--------------|
| 96                                      |              |              |              | 96                                     |              |              |              |
| Dimer TS1 SCF Done: -2319.65863300 A.U. |              |              |              | Dimer I2 SCF Done: -2319.67926237 A.U. |              |              |              |
| O                                       | -3.140611000 | 0.543685000  | -0.684206000 | O                                      | -2.951016000 | 1.161585000  | 1.031292000  |
| O                                       | -3.688941000 | -1.066663000 | 1.933038000  | O                                      | -4.356112000 | -1.129837000 | 2.558935000  |
| H                                       | -3.011591000 | -0.335487000 | 2.023833000  | H                                      | -3.377291000 | -0.517438000 | 3.354878000  |
| C                                       | -4.081878000 | -0.408824000 | -0.430514000 | C                                      | -4.083446000 | 0.443549000  | 0.699261000  |
| O                                       | -5.894581000 | -2.779106000 | 1.324091000  | O                                      | -6.756991000 | -1.717367000 | 1.030522000  |
| C                                       | -4.253301000 | -1.091460000 | 0.723898000  | C                                      | -4.648863000 | -0.553776000 | 1.435334000  |
| O                                       | -5.807315000 | -1.939737000 | -0.766040000 | O                                      | -6.012149000 | -0.176493000 | -0.438691000 |
| C                                       | -5.372147000 | -2.036841000 | 0.517467000  | C                                      | -5.900240000 | -0.921830000 | 0.698801000  |
| O                                       | -5.469444000 | 0.764091000  | -3.121608000 | O                                      | -4.520215000 | 3.111428000  | -0.849027000 |
| H                                       | -6.228732000 | 1.183459000  | -3.575437000 | H                                      | -5.027986000 | 3.913859000  | -1.087064000 |
| O                                       | -8.140642000 | 0.594106000  | -3.097088000 | O                                      | -7.051395000 | 3.801539000  | -1.383562000 |
| H                                       | -8.470596000 | 1.181257000  | -2.388856000 | H                                      | -7.440468000 | 4.008598000  | -0.510342000 |
| C                                       | -5.072519000 | -0.909028000 | -1.464245000 | C                                      | -4.929196000 | 0.781861000  | -0.499938000 |
| H                                       | -4.570891000 | -1.370913000 | -2.322909000 | H                                      | -4.412548000 | 0.651081000  | -1.459611000 |
| C                                       | -6.072744000 | 0.130864000  | -1.998918000 | C                                      | -5.537445000 | 2.191786000  | -0.464099000 |
| H                                       | -6.275532000 | 0.869940000  | -1.210700000 | H                                      | -5.857047000 | 2.388131000  | 0.570417000  |
| C                                       | -7.425183000 | -0.447282000 | -2.439981000 | C                                      | -6.755542000 | 2.406177000  | -1.369264000 |
| H                                       | -7.271236000 | -1.245123000 | -3.173846000 | H                                      | -6.513694000 | 2.123817000  | -2.399797000 |
| H                                       | -7.976599000 | -0.850007000 | -1.584935000 | H                                      | -7.604094000 | 1.805478000  | -1.025135000 |
| O                                       | -2.005264000 | 0.928337000  | 2.133242000  | O                                      | -2.565361000 | -0.173489000 | 3.962527000  |
| C                                       | -0.533678000 | 0.280465000  | 1.233113000  | C                                      | -1.181790000 | -1.215094000 | 2.326209000  |
| H                                       | -0.530524000 | -0.797275000 | 1.346803000  | H                                      | -1.206224000 | -0.238873000 | 1.850483000  |
| C                                       | -0.621359000 | 1.123820000  | 2.423271000  | H                                      | -1.847703000 | -1.893654000 | 1.795118000  |
| H                                       | -0.315585000 | 2.164400000  | 2.279479000  | C                                      | -1.508249000 | -1.121937000 | 3.822606000  |
| I                                       | 2.086934000  | 0.613133000  | 0.123018000  | H                                      | -0.645606000 | -0.707867000 | 4.360058000  |
| C                                       | -0.155569000 | 0.564239000  | 3.747520000  | I                                      | 0.885882000  | -1.969695000 | 1.935598000  |
| H                                       | 0.937421000  | 0.596961000  | 3.804946000  | C                                      | -1.911607000 | -2.463929000 | 4.424736000  |
| H                                       | -0.575755000 | 1.157107000  | 4.566783000  | H                                      | -1.111405000 | -3.203754000 | 4.315849000  |
| H                                       | -0.487006000 | -0.473112000 | 3.864416000  | H                                      | -2.138146000 | -2.339530000 | 5.487972000  |
| C                                       | -3.639391000 | 1.867291000  | -0.988380000 | H                                      | -2.810860000 | -2.829649000 | 3.917832000  |
| C                                       | -2.498324000 | 2.856764000  | -0.824482000 | C                                      | -3.233019000 | 2.357204000  | 1.780185000  |
| C                                       | -1.342113000 | 2.506319000  | -1.771171000 | C                                      | -1.953449000 | 2.856706000  | 2.438420000  |
| N                                       | -0.345585000 | 3.637850000  | -2.028793000 | C                                      | -0.885327000 | 2.975946000  | 1.345540000  |
| O                                       | -2.053352000 | 2.946849000  | 0.518120000  | N                                      | 0.517494000  | 3.330131000  | 1.845257000  |
| H                                       | -2.180834000 | 2.079684000  | 1.024916000  | O                                      | -1.509138000 | 2.072594000  | 3.539707000  |
| C                                       | -1.007695000 | 4.768648000  | -2.772126000 | H                                      | -1.996557000 | 1.162743000  | 3.600460000  |
| H                                       | -1.442179000 | 4.376179000  | -3.693591000 | C                                      | 0.462466000  | 4.372379000  | 2.934661000  |
| H                                       | -1.785253000 | 5.222162000  | -2.153367000 | H                                      | -0.143486000 | 5.218211000  | 2.603664000  |
| H                                       | -0.246588000 | 5.514433000  | -3.008559000 | H                                      | 0.003542000  | 3.928014000  | 3.815832000  |
| C                                       | 0.771857000  | 3.066455000  | -2.868692000 | H                                      | 1.484174000  | 4.689735000  | 3.153615000  |
| H                                       | 1.4753472000 | 3.867879000  | -3.101455000 | C                                      | 1.297401000  | 3.875862000  | 0.682518000  |
| H                                       | 1.271990000  | 2.280017000  | -2.295660000 | H                                      | 2.332303000  | 4.034747000  | 0.992142000  |
| H                                       | 0.346571000  | 2.663420000  | -3.789702000 | H                                      | 1.259458000  | 3.154456000  | -0.135618000 |
| C                                       | 0.251681000  | 4.164579000  | -0.743851000 | H                                      | 0.851062000  | 4.821093000  | 0.369344000  |
| H                                       | -0.536041000 | 4.624369000  | -0.152338000 | C                                      | 1.209688000  | 2.090097000  | 2.362115000  |
| H                                       | 0.704639000  | 3.329557000  | -0.204950000 | H                                      | 0.592184000  | 1.675064000  | 3.155161000  |
| H                                       | 1.013383000  | 4.898943000  | -1.013800000 | H                                      | 1.303431000  | 1.368760000  | 1.548643000  |
| H                                       | -4.436465000 | 2.130759000  | -0.287430000 | H                                      | 2.198319000  | 2.373946000  | 2.728976000  |

|                                                           |              |              |              |                                                           |              |              |             |
|-----------------------------------------------------------|--------------|--------------|--------------|-----------------------------------------------------------|--------------|--------------|-------------|
| H                                                         | -4.050070000 | 1.893186000  | -2.001040000 | H                                                         | -3.980746000 | 2.134060000  | 2.544782000 |
| H                                                         | -1.728535000 | 2.227082000  | -2.755265000 | H                                                         | -3.627231000 | 3.129744000  | 1.113171000 |
| H                                                         | -0.750260000 | 1.677275000  | -1.382086000 | H                                                         | -1.186937000 | 3.771694000  | 0.659369000 |
| H                                                         | -2.920790000 | 3.833099000  | -1.084613000 | H                                                         | -0.786199000 | 2.046122000  | 0.784022000 |
| H                                                         | -0.777783000 | 0.669509000  | 0.266499000  | H                                                         | -2.169598000 | 3.863944000  | 2.813849000 |
| O                                                         | -5.805367000 | 3.488401000  | 2.804346000  | O                                                         | -5.523226000 | 3.227405000  | 5.292044000 |
| O                                                         | -6.611719000 | 3.613747000  | -0.274249000 | O                                                         | -5.748628000 | 4.784060000  | 2.514199000 |
| H                                                         | -6.023463000 | 4.354566000  | -0.010496000 | H                                                         | -5.049270000 | 5.150665000  | 3.096464000 |
| C                                                         | -6.688134000 | 2.766894000  | 2.066769000  | C                                                         | -6.350949000 | 3.069368000  | 4.220016000 |
| O                                                         | -8.700533000 | 1.645983000  | -0.519557000 | O                                                         | -8.075673000 | 3.648627000  | 1.271872000 |
| C                                                         | -7.030320000 | 2.865690000  | 0.764274000  | C                                                         | -6.443466000 | 3.779434000  | 3.074846000 |
| O                                                         | -8.367905000 | 1.206593000  | 1.667770000  | O                                                         | -8.198619000 | 2.269649000  | 3.051800000 |
| C                                                         | -8.104100000 | 1.877500000  | 0.510121000  | C                                                         | -7.624449000 | 3.272991000  | 2.332679000 |
| O                                                         | -5.475050000 | 0.801398000  | 3.826437000  | O                                                         | -5.754176000 | 0.319480000  | 4.885574000 |
| H                                                         | -5.104156000 | -0.053329000 | 4.127330000  | H                                                         | -5.500533000 | -0.608112000 | 4.704759000 |
| O                                                         | -6.234145000 | -1.761765000 | 3.933740000  | O                                                         | -7.074125000 | -1.808066000 | 3.863400000 |
| H                                                         | -5.908541000 | -2.228023000 | 3.135188000  | H                                                         | -6.734893000 | -1.951539000 | 2.954363000 |
| C                                                         | -7.424279000 | 1.606885000  | 2.683015000  | C                                                         | -7.365827000 | 1.955482000  | 4.189081000 |
| H                                                         | -7.973488000 | 1.876584000  | 3.591410000  | H                                                         | -7.992227000 | 1.925131000  | 5.087152000 |
| C                                                         | -6.497809000 | 0.406312000  | 2.932723000  | C                                                         | -6.734763000 | 0.582881000  | 3.899855000 |
| H                                                         | -6.074154000 | 0.151149000  | 1.949735000  | H                                                         | -6.265920000 | 0.675876000  | 2.909626000 |
| C                                                         | -7.213125000 | -0.829035000 | 3.502502000  | C                                                         | -7.755209000 | -0.568503000 | 3.868778000 |
| H                                                         | -7.786783000 | -0.538427000 | 4.390915000  | H                                                         | -8.352246000 | -0.540002000 | 4.789355000 |
| H                                                         | -7.899235000 | -1.253601000 | 2.759893000  | H                                                         | -8.427135000 | -0.452615000 | 3.008518000 |
| I                                                         | -4.103375000 | 6.350383000  | -0.462279000 | I                                                         | -2.718830000 | 6.603266000  | 3.615997000 |
| C                                                         | -4.424686000 | 3.312308000  | 2.434561000  | C                                                         | -4.150864000 | 2.869701000  | 5.065247000 |
| C                                                         | -3.579329000 | 4.217509000  | 3.331265000  | C                                                         | -3.358239000 | 3.149399000  | 6.339291000 |
| C                                                         | -4.175938000 | 5.633357000  | 3.261353000  | C                                                         | -3.626805000 | 4.608940000  | 6.731568000 |
| N                                                         | -3.319988000 | 6.752046000  | 3.856910000  | N                                                         | -2.705151000 | 5.202558000  | 7.797464000 |
| O                                                         | -2.217814000 | 4.166169000  | 2.945850000  | O                                                         | -1.979123000 | 2.899315000  | 6.129851000 |
| H                                                         | -2.165719000 | 3.946785000  | 1.986222000  | H                                                         | -1.820122000 | 2.606704000  | 5.197811000 |
| C                                                         | -2.797824000 | 6.367170000  | 5.210523000  | C                                                         | -2.542556000 | 4.258484000  | 8.952589000 |
| H                                                         | -3.637172000 | 6.068816000  | 5.841893000  | H                                                         | -3.530823000 | 3.986900000  | 9.328911000 |
| H                                                         | -2.100792000 | 5.538411000  | 5.089811000  | H                                                         | -2.014557000 | 3.371924000  | 8.601962000 |
| H                                                         | -2.287481000 | 7.227807000  | 5.647795000  | H                                                         | -1.967583000 | 4.757087000  | 9.735734000 |
| C                                                         | -4.199854000 | 7.967849000  | 3.971483000  | C                                                         | -3.336113000 | 6.486715000  | 8.264093000 |
| H                                                         | -3.601695000 | 8.805915000  | 4.334933000  | H                                                         | -2.666124000 | 6.972891000  | 8.976220000 |
| H                                                         | -4.602932000 | 8.193266000  | 2.982224000  | H                                                         | -3.491296000 | 7.127396000  | 7.393702000 |
| H                                                         | -5.011975000 | 7.756575000  | 4.669265000  | H                                                         | -4.291636000 | 6.262191000  | 8.741267000 |
| C                                                         | -2.158904000 | 7.099110000  | 2.947317000  | C                                                         | -1.346199000 | 5.532711000  | 7.215468000 |
| H                                                         | -1.517258000 | 6.224961000  | 2.882303000  | H                                                         | -0.901588000 | 4.602939000  | 6.871711000 |
| H                                                         | -2.558041000 | 7.339834000  | 1.959380000  | H                                                         | -1.493100000 | 6.205655000  | 6.367274000 |
| H                                                         | -1.635755000 | 7.954077000  | 3.381655000  | H                                                         | -0.750901000 | 6.006859000  | 7.999301000 |
| H                                                         | -4.279061000 | 3.618961000  | 1.394911000  | H                                                         | -3.739921000 | 3.496176000  | 4.268169000 |
| H                                                         | -4.125558000 | 2.271409000  | 2.576890000  | H                                                         | -4.084475000 | 1.808974000  | 4.813282000 |
| H                                                         | -5.124270000 | 5.645161000  | 3.802158000  | H                                                         | -4.644531000 | 4.686563000  | 7.119179000 |
| H                                                         | -4.353687000 | 5.924201000  | 2.222865000  | H                                                         | -3.524659000 | 5.265013000  | 5.863208000 |
| H                                                         | -3.638047000 | 3.842427000  | 4.359638000  | H                                                         | -3.723273000 | 2.480221000  | 7.130620000 |
| Zero-point correction= 0.811500 (Hartree/Particle)        |              |              |              | Zero-point correction= 0.811113 (Hartree/Particle)        |              |              |             |
| Thermal correction to Energy= 0.863522                    |              |              |              | Thermal correction to Energy= 0.863002                    |              |              |             |
| Thermal correction to Enthalpy= 0.864466                  |              |              |              | Thermal correction to Enthalpy= 0.863947                  |              |              |             |
| Thermal correction to Gibbs Free Energy= 0.721498         |              |              |              | Thermal correction to Gibbs Free Energy= 0.720662         |              |              |             |
| Sum of electronic and zero-point Energies= -2318.847133   |              |              |              | Sum of electronic and zero-point Energies= -2318.868150   |              |              |             |
| Sum of electronic and thermal Energies= -2318.795111      |              |              |              | Sum of electronic and thermal Energies= -2318.816260      |              |              |             |
| Sum of electronic and thermal Enthalpies= -2318.794167    |              |              |              | Sum of electronic and thermal Enthalpies= -2318.815316    |              |              |             |
| Sum of electronic and thermal Free Energies= -2318.937135 |              |              |              | Sum of electronic and thermal Free Energies= -2318.958601 |              |              |             |

|                                         |              |              |             |                                        |              |              |             |
|-----------------------------------------|--------------|--------------|-------------|----------------------------------------|--------------|--------------|-------------|
| <b>TS2</b>                              |              |              |             | <b>I3</b>                              |              |              |             |
| 99                                      |              |              |             | 99                                     |              |              |             |
| Dimer TS2 SCF Done: -2508.27215629 A.U. |              |              |             | Dimer I3 SCF Done: -2508.27195727 A.U. |              |              |             |
| O                                       | -2.756881000 | 0.935684000  | 1.233905000 | O                                      | -2.742770000 | 0.681940000  | 1.456529000 |
| O                                       | -4.299509000 | -1.443284000 | 2.502093000 | O                                      | -4.412262000 | -1.144927000 | 3.253996000 |
| H                                       | -3.404610000 | -1.181498000 | 2.980673000 | H                                      | -2.927990000 | -0.984170000 | 3.780749000 |
| C                                       | -3.888822000 | 0.305851000  | 0.818915000 | C                                      | -3.939048000 | 0.065693000  | 1.196267000 |
| O                                       | -6.656076000 | -1.760578000 | 0.856906000 | O                                      | -6.870170000 | -1.702785000 | 1.653052000 |
| C                                       | -4.533150000 | -0.724748000 | 1.400370000 | C                                      | -4.650048000 | -0.728350000 | 2.042833000 |

|   |              |              |              |   |              |              |              |
|---|--------------|--------------|--------------|---|--------------|--------------|--------------|
| O | -5.801450000 | -0.101022000 | -0.438222000 | O | -5.910519000 | -0.402921000 | 0.083574000  |
| C | -5.771987000 | -0.971144000 | 0.625995000  | C | -5.916045000 | -1.036654000 | 1.300954000  |
| O | -4.189963000 | 3.142826000  | 0.005247000  | O | -4.042212000 | 2.735708000  | -0.066254000 |
| H | -4.625912000 | 4.007738000  | -0.141393000 | H | -4.424359000 | 3.589213000  | -0.357343000 |
| O | -6.498769000 | 4.088121000  | -0.958946000 | O | -6.288042000 | 3.703039000  | -1.133758000 |
| H | -7.110867000 | 4.146279000  | -0.197312000 | H | -6.860427000 | 3.934944000  | -0.373530000 |
| C | -4.692352000 | 0.817184000  | -0.346448000 | C | -4.731782000 | 0.425039000  | -0.020017000 |
| H | -4.141738000 | 0.803151000  | -1.294679000 | H | -4.234306000 | 0.205063000  | -0.973258000 |
| C | -5.264664000 | 2.218888000  | -0.091361000 | C | -5.188242000 | 1.892918000  | 0.004484000  |
| H | -5.804433000 | 2.156888000  | 0.865910000  | H | -5.703008000 | 2.034654000  | 0.967407000  |
| C | -6.242621000 | 2.704448000  | -1.169630000 | C | -6.151312000 | 2.283924000  | -1.122844000 |
| H | -5.772548000 | 2.618690000  | -2.156258000 | H | -5.720058000 | 2.004203000  | -2.091040000 |
| H | -7.157434000 | 2.101760000  | -1.156298000 | H | -7.112964000 | 1.772645000  | -1.000895000 |
| O | -2.119394000 | -0.887791000 | 3.686646000  | O | -1.949453000 | -0.959177000 | 4.083284000  |
| C | -0.934778000 | -1.803821000 | 1.904582000  | C | -1.348239000 | -2.147477000 | 2.116204000  |
| H | -0.691335000 | -0.775823000 | 1.648797000  | H | -0.975258000 | -1.195934000 | 1.745314000  |
| H | -1.766348000 | -2.158758000 | 1.295269000  | H | -2.333430000 | -2.347859000 | 1.696611000  |
| C | -1.216762000 | -1.947563000 | 3.405932000  | C | -1.351234000 | -2.187405000 | 3.647404000  |
| H | -0.277912000 | -1.780701000 | 3.958515000  | H | -0.318705000 | -2.165425000 | 4.014053000  |
| I | 0.835709000  | -2.979172000 | 1.205578000  | I | -0.000185000 | -3.673826000 | 1.210341000  |
| C | -1.791943000 | -3.313692000 | 3.778831000  | C | -2.105527000 | -3.378083000 | 4.230587000  |
| H | -1.089623000 | -4.116708000 | 3.533087000  | H | -1.659589000 | -4.326024000 | 3.914165000  |
| H | -2.011696000 | -3.349476000 | 4.848525000  | H | -2.086402000 | -3.324938000 | 5.323656000  |
| H | -2.728226000 | -3.485104000 | 3.236203000  | H | -3.149801000 | -3.341512000 | 3.902097000  |
| C | -2.966566000 | 1.730277000  | 2.413843000  | C | -2.835563000 | 1.604206000  | 2.542344000  |
| C | -1.615807000 | 2.278728000  | 2.848567000  | C | -1.425754000 | 2.114657000  | 2.806840000  |
| C | -1.097222000 | 3.154050000  | 1.708624000  | C | -1.024473000 | 2.951414000  | 1.593039000  |
| N | 0.316896000  | 3.701178000  | 1.922488000  | N | 0.454029000  | 3.346438000  | 1.538760000  |
| O | -0.691221000 | 1.268206000  | 3.179414000  | O | -0.502952000 | 1.066161000  | 3.019013000  |
| H | -1.219491000 | 0.448391000  | 3.450736000  | H | -0.993147000 | 0.314739000  | 3.452109000  |
| C | 0.537110000  | 4.096249000  | 3.360106000  | C | 0.991429000  | 3.673464000  | 2.910006000  |
| H | -0.250128000 | 4.797585000  | 3.645158000  | H | 0.365168000  | 4.454449000  | 3.344531000  |
| H | 0.500838000  | 3.193794000  | 3.969855000  | H | 0.962560000  | 2.766188000  | 3.512851000  |
| H | 1.517573000  | 4.572080000  | 3.432996000  | H | 2.016995000  | 4.030774000  | 2.794511000  |
| C | 0.474022000  | 4.917843000  | 1.050824000  | C | 0.567629000  | 4.566571000  | 0.666677000  |
| H | 1.506775000  | 5.267391000  | 1.116487000  | H | 1.624121000  | 4.809275000  | 0.533367000  |
| H | 0.237350000  | 4.639389000  | 0.022315000  | H | 0.108160000  | 4.347677000  | -0.298954000 |
| H | -0.218563000 | 5.687693000  | 1.399178000  | H | 0.042345000  | 5.391663000  | 1.152886000  |
| C | 1.332665000  | 2.658418000  | 1.529252000  | C | 1.257807000  | 2.218903000  | 0.941881000  |
| H | 1.121257000  | 1.757410000  | 2.103123000  | H | 1.071737000  | 1.328195000  | 1.539423000  |
| H | 1.226219000  | 2.459272000  | 0.461421000  | H | 0.922379000  | 2.062323000  | -0.084823000 |
| H | 2.331003000  | 3.048981000  | 1.738865000  | H | 2.313339000  | 2.499529000  | 0.953445000  |
| H | -3.383974000 | 1.110511000  | 3.209893000  | H | -3.236212000 | 1.104346000  | 3.426862000  |
| H | -3.652254000 | 2.549698000  | 2.178531000  | H | -3.498834000 | 2.433195000  | 2.268641000  |
| H | -1.756414000 | 4.016795000  | 1.601006000  | H | -1.596406000 | 3.879691000  | 1.609755000  |
| H | -1.076209000 | 2.594492000  | 0.772981000  | H | -1.243342000 | 2.411818000  | 0.670671000  |
| H | -1.803337000 | 2.921317000  | 3.721564000  | H | -1.468776000 | 2.769750000  | 3.690641000  |
| O | -5.619316000 | 3.529486000  | 5.229422000  | O | -5.581376000 | 3.509551000  | 5.277418000  |
| O | -6.055174000 | 4.892563000  | 2.421232000  | O | -5.577527000 | 4.760216000  | 2.347970000  |
| H | -5.255840000 | 5.220315000  | 2.887088000  | H | -4.822895000 | 5.042670000  | 2.899388000  |
| C | -6.400447000 | 3.163386000  | 4.173025000  | C | -6.351659000 | 3.263517000  | 4.183643000  |
| O | -8.172414000 | 3.382055000  | 1.207425000  | O | -7.952935000 | 3.666580000  | 1.143044000  |
| C | -6.587632000 | 3.806415000  | 3.002271000  | C | -6.358156000 | 3.851126000  | 2.970052000  |
| O | -8.070063000 | 2.031724000  | 3.012984000  | O | -8.226941000 | 2.490828000  | 3.050580000  |
| C | -7.671336000 | 3.103429000  | 2.276105000  | C | -7.556690000 | 3.361834000  | 2.249364000  |
| O | -5.642607000 | 0.445842000  | 5.214300000  | O | -5.747246000 | 0.621654000  | 4.908154000  |
| H | -5.531621000 | -0.527538000 | 5.292196000  | H | -5.303694000 | -0.189851000 | 4.555369000  |
| O | -6.573453000 | -1.797116000 | 4.196002000  | O | -7.430537000 | -1.577387000 | 4.415480000  |
| H | -5.947382000 | -1.942700000 | 3.457151000  | H | -7.142298000 | -1.790243000 | 3.503258000  |
| C | -7.244244000 | 1.912005000  | 4.193274000  | C | -7.433931000 | 2.221518000  | 4.231085000  |
| H | -7.894888000 | 1.860485000  | 5.073368000  | H | -8.079316000 | 2.328939000  | 5.110045000  |
| C | -6.445406000 | 0.604747000  | 4.056144000  | C | -6.888372000 | 0.780821000  | 4.090571000  |
| H | -5.814300000 | 0.711909000  | 3.160607000  | H | -6.605681000 | 0.696505000  | 3.032554000  |
| C | -7.340783000 | -0.640958000 | 3.896657000  | C | -7.959096000 | -0.274894000 | 4.413802000  |
| H | -8.148234000 | -0.607452000 | 4.637552000  | H | -8.328722000 | -0.088279000 | 5.431107000  |
| H | -7.777655000 | -0.677674000 | 2.894051000  | H | -8.803716000 | -0.152085000 | 3.714724000  |
| I | -2.750588000 | 6.436349000  | 3.187107000  | I | -2.116623000 | 6.146650000  | 3.624531000  |



|                                                           |              |              |             |                                                           |              |             |              |
|-----------------------------------------------------------|--------------|--------------|-------------|-----------------------------------------------------------|--------------|-------------|--------------|
| C                                                         | -4.246382000 | 3.106848000  | 5.155264000 | C                                                         | -4.191593000 | 3.167352000 | 5.172864000  |
| C                                                         | -3.541709000 | 3.549509000  | 6.436193000 | C                                                         | -3.474357000 | 3.666309000 | 6.430906000  |
| C                                                         | -3.740165000 | 5.059834000  | 6.567101000 | C                                                         | -4.002417000 | 5.062207000 | 6.791361000  |
| N                                                         | -2.842327000 | 5.788466000  | 7.565084000 | N                                                         | -3.311941000 | 5.753018000 | 7.972503000  |
| O                                                         | -2.158778000 | 3.242916000  | 6.347414000 | O                                                         | -2.068813000 | 3.630948000 | 6.223513000  |
| H                                                         | -2.073391000 | 2.278165000  | 6.201817000 | H                                                         | -1.873934000 | 4.208235000 | 5.448810000  |
| C                                                         | -2.757253000 | 5.040299000  | 8.863590000 | C                                                         | -3.217034000 | 4.828011000 | 9.153118000  |
| H                                                         | -3.768148000 | 4.869652000  | 9.238970000 | H                                                         | -4.210101000 | 4.433154000 | 9.375905000  |
| H                                                         | -2.255018000 | 4.091698000  | 8.676397000 | H                                                         | -2.534864000 | 4.015233000 | 8.907132000  |
| H                                                         | -2.188605000 | 5.638972000  | 9.578075000 | H                                                         | -2.835340000 | 5.390128000 | 10.007615000 |
| C                                                         | -3.444330000 | 7.149872000  | 7.791058000 | C                                                         | -4.149445000 | 6.949425000 | 8.337502000  |
| H                                                         | -2.781729000 | 7.727135000  | 8.438902000 | H                                                         | -3.660429000 | 7.492506000 | 9.148532000  |
| H                                                         | -3.550014000 | 7.643070000  | 6.822649000 | H                                                         | -4.239422000 | 7.590375000 | 7.458946000  |
| H                                                         | -4.421676000 | 7.033772000  | 8.262603000 | H                                                         | -5.136951000 | 6.610955000 | 8.655256000  |
| C                                                         | -1.453503000 | 5.979992000  | 6.990510000 | C                                                         | -1.925093000 | 6.238421000 | 7.605528000  |
| H                                                         | -1.026877000 | 4.997011000  | 6.811367000 | H                                                         | -1.304500000 | 5.369387000 | 7.405495000  |
| H                                                         | -1.549068000 | 6.518644000  | 6.044838000 | H                                                         | -1.993902000 | 6.847436000 | 6.702351000  |
| H                                                         | -0.865672000 | 6.550843000  | 7.712745000 | H                                                         | -1.537957000 | 6.820203000 | 8.444778000  |
| H                                                         | -3.757909000 | 3.593188000  | 4.305373000 | H                                                         | -3.745906000 | 3.658255000 | 4.302383000  |
| H                                                         | -4.197212000 | 2.021238000  | 5.072483000 | H                                                         | -4.098656000 | 2.085866000 | 5.094000000  |
| H                                                         | -4.771378000 | 5.244306000  | 6.872352000 | H                                                         | -5.057954000 | 4.980999000 | 7.054572000  |
| H                                                         | -3.563880000 | 5.551407000  | 5.606839000 | H                                                         | -3.895289000 | 5.741215000 | 5.942717000  |
| H                                                         | -4.000407000 | 3.031951000  | 7.292290000 | H                                                         | -3.672743000 | 2.964461000 | 7.244627000  |
| C                                                         | -2.723837000 | -0.537788000 | 5.649176000 | C                                                         | -1.503603000 | 0.703485000 | 6.291014000  |
| O                                                         | -3.393669000 | -1.472257000 | 5.908752000 | O                                                         | -2.632344000 | 0.640931000 | 6.595281000  |
| O                                                         | -2.187416000 | 0.511528000  | 5.832524000 | O                                                         | -0.368669000 | 0.791346000 | 6.026527000  |
| Zero-point correction= 0.825694 (Hartree/Particle)        |              |              |             | Zero-point correction= 0.826351 (Hartree/Particle)        |              |             |              |
| Thermal correction to Energy= 0.880313                    |              |              |             | Thermal correction to Energy= 0.882192                    |              |             |              |
| Thermal correction to Enthalpy= 0.881257                  |              |              |             | Thermal correction to Enthalpy= 0.883136                  |              |             |              |
| Thermal correction to Gibbs Free Energy= 0.732900         |              |              |             | Thermal correction to Gibbs Free Energy= 0.730490         |              |             |              |
| Sum of electronic and zero-point Energies= -2507.446462   |              |              |             | Sum of electronic and zero-point Energies= -2507.445606   |              |             |              |
| Sum of electronic and thermal Energies= -2507.391843      |              |              |             | Sum of electronic and thermal Energies= -2507.389765      |              |             |              |
| Sum of electronic and thermal Enthalpies= -2507.390899    |              |              |             | Sum of electronic and thermal Enthalpies= -2507.388821    |              |             |              |
| Sum of electronic and thermal Free Energies= -2507.539256 |              |              |             | Sum of electronic and thermal Free Energies= -2507.541467 |              |             |              |

| <b>TS3</b> |                                         |              |              | <b>I4</b> |                                        |              |              |
|------------|-----------------------------------------|--------------|--------------|-----------|----------------------------------------|--------------|--------------|
| 99         | Dimer TS3 SCF Done: -2508.26748556 A.U. |              |              | 99        | Dimer I4 SCF Done: -2508.31443586 A.U. |              |              |
| O          | -2.681262000                            | 0.837038000  | 0.152752000  | O         | -2.569095000                           | 0.587021000  | 0.515175000  |
| O          | -4.123799000                            | -1.694625000 | 1.228886000  | O         | -4.045469000                           | -1.947267000 | 1.409562000  |
| H          | -3.178420000                            | -1.581935000 | 1.560982000  | H         | -3.110689000                           | -1.877188000 | 1.710964000  |
| C          | -3.681997000                            | 0.098644000  | -0.393209000 | C         | -3.560771000                           | -0.086578000 | -0.116264000 |
| O          | -6.177954000                            | -2.261002000 | -0.763308000 | O         | -6.108495000                           | -2.362329000 | -0.638274000 |
| C          | -4.282434000                            | -1.004182000 | 0.096635000  | C         | -4.193320000                           | -1.199617000 | -0.297632000 |
| O          | -5.236206000                            | -0.598729000 | -1.974357000 | O         | -5.106384000                           | -0.662977000 | -1.750264000 |
| C          | -5.325583000                            | -1.403856000 | -0.869489000 | C         | -5.232114000                           | -1.522527000 | -0.696123000 |
| O          | -4.307361000                            | 2.880583000  | -1.336763000 | O         | -3.970865000                           | 2.691273000  | -0.802569000 |
| H          | -4.576224000                            | 3.574540000  | -1.978586000 | H         | -3.185210000                           | 2.861346000  | -1.370085000 |
| O          | -6.258540000                            | 3.410188000  | -3.014970000 | O         | -5.881784000                           | 3.456297000  | -2.720499000 |
| H          | -6.977651000                            | 3.472660000  | -2.350249000 | H         | -6.719102000                           | 3.354785000  | -2.227490000 |
| C          | -4.283797000                            | 0.459386000  | -1.723234000 | C         | -4.091854000                           | 0.330782000  | -1.460394000 |
| H          | -3.547551000                            | 0.480992000  | -2.535318000 | H         | -3.326210000                           | 0.296240000  | -2.242928000 |
| C          | -5.116331000                            | 1.749849000  | -1.696060000 | C         | -4.786113000                           | 1.707188000  | -1.440600000 |
| H          | -5.869993000                            | 1.596627000  | -0.918809000 | H         | -5.654153000                           | 1.587941000  | -0.789737000 |
| C          | -5.828764000                            | 2.054085000  | -3.024239000 | C         | -5.260927000                           | 2.190610000  | -2.815212000 |
| H          | -5.125290000                            | 1.958552000  | -3.859198000 | H         | -4.389594000                           | 2.311963000  | -3.469435000 |
| H          | -6.652417000                            | 1.348169000  | -3.174769000 | H         | -5.915769000                           | 1.422202000  | -3.254013000 |
| O          | -1.609192000                            | -1.298055000 | 1.943203000  | O         | -1.257671000                           | -1.579109000 | 1.839926000  |
| C          | -0.916464000                            | -1.374234000 | 0.899193000  | C         | -0.744425000                           | -1.528605000 | 0.732359000  |
| O          | 0.356444000                             | -0.877225000 | 0.988935000  | O         | 0.363552000                            | -0.837124000 | 0.462435000  |
| O          | -1.266405000                            | -1.794673000 | -0.241751000 | O         | -1.231982000                           | -2.152406000 | -0.339960000 |
| C          | -0.043188000                            | -0.602092000 | -1.337028000 | C         | -0.520777000                           | -1.690384000 | -1.517550000 |
| H          | -0.769255000                            | 0.171693000  | -1.158218000 | H         | -1.146770000                           | -0.961767000 | -2.038733000 |
| H          | -0.147441000                            | -1.196421000 | -2.231838000 | H         | -0.320038000                           | -2.556372000 | -2.149903000 |
| C          | 1.016337000                             | -0.922984000 | -0.298868000 | C         | 0.745054000                            | -1.037205000 | -0.937344000 |

|   |              |              |              |   |              |              |              |
|---|--------------|--------------|--------------|---|--------------|--------------|--------------|
| H | 1.765963000  | -0.137984000 | -0.242028000 | H | 0.890775000  | -0.043301000 | -1.365349000 |
| I | 1.226668000  | 1.372616000  | -2.764280000 | I | -0.837719000 | 2.128703000  | -2.646631000 |
| C | 1.694841000  | -2.266520000 | -0.536712000 | C | 1.999102000  | -1.889014000 | -0.995737000 |
| H | 2.259112000  | -2.232552000 | -1.474708000 | H | 2.315621000  | -2.003432000 | -2.038205000 |
| H | 2.387796000  | -2.480222000 | 0.282235000  | H | 2.811977000  | -1.415002000 | -0.437763000 |
| H | 0.950608000  | -3.064788000 | -0.593575000 | H | 1.816626000  | -2.883813000 | -0.573590000 |
| C | -3.055199000 | 1.604187000  | 1.317009000  | C | -2.970884000 | 1.268382000  | 1.729376000  |
| C | -1.794683000 | 2.188205000  | 1.952344000  | C | -1.735982000 | 1.971942000  | 2.282544000  |
| C | -0.951237000 | 2.836459000  | 0.839601000  | C | -1.194987000 | 2.902072000  | 1.175061000  |
| N | 0.403587000  | 3.383642000  | 1.289839000  | N | 0.230750000  | 3.410407000  | 1.353348000  |
| O | -1.072115000 | 1.289768000  | 2.765134000  | O | -0.770409000 | 1.073580000  | 2.803574000  |
| H | -1.242440000 | 0.351017000  | 2.508551000  | H | -0.945493000 | 0.160337000  | 2.500429000  |
| C | 0.339854000  | 4.009216000  | 2.657580000  | C | 0.490111000  | 3.852999000  | 2.767081000  |
| H | -0.445905000 | 4.766306000  | 2.658620000  | H | -0.261082000 | 4.597221000  | 3.038994000  |
| H | 0.137842000  | 3.223963000  | 3.385075000  | H | 0.441596000  | 2.980335000  | 3.417074000  |
| H | 1.307357000  | 4.473802000  | 2.858389000  | H | 1.485218000  | 4.301175000  | 2.805713000  |
| C | 0.824696000  | 4.425519000  | 0.282733000  | C | 0.410296000  | 4.584435000  | 0.416785000  |
| H | 1.837263000  | 4.752759000  | 0.528372000  | H | 1.455844000  | 4.896944000  | 0.461669000  |
| H | 0.811681000  | 3.968275000  | -0.709509000 | H | 0.153980000  | 4.256863000  | -0.593513000 |
| H | 0.125632000  | 5.262622000  | 0.337565000  | H | -0.243881000 | 5.394660000  | 0.742116000  |
| C | 1.422466000  | 2.271098000  | 1.294430000  | C | 1.212936000  | 2.337006000  | 0.954769000  |
| H | 1.025770000  | 1.448026000  | 1.885826000  | H | 1.031080000  | 1.460848000  | 1.570887000  |
| H | 1.586298000  | 1.967027000  | 0.259231000  | H | 1.043677000  | 2.109740000  | -0.099937000 |
| H | 2.351088000  | 2.659018000  | 1.718793000  | H | 2.221708000  | 2.728946000  | 1.103548000  |
| H | -3.587408000 | 0.973900000  | 2.039198000  | H | -3.378985000 | 0.557246000  | 2.455042000  |
| H | -3.711555000 | 2.415248000  | 0.989168000  | H | -3.743532000 | 1.996087000  | 1.472184000  |
| H | -1.513381000 | 3.679336000  | 0.432907000  | H | -1.832870000 | 3.788496000  | 1.130817000  |
| H | -0.728569000 | 2.139143000  | 0.033801000  | H | -1.206287000 | 2.411254000  | 0.202438000  |
| H | -2.143936000 | 2.995904000  | 2.609293000  | H | -2.073858000 | 2.594016000  | 3.122762000  |
| O | -6.074904000 | 2.737803000  | 3.377670000  | O | -5.846691000 | 2.773817000  | 3.300088000  |
| O | -5.875226000 | 4.178284000  | 0.567641000  | O | -5.801712000 | 4.250721000  | 0.491124000  |
| H | -5.211415000 | 3.806401000  | -0.066894000 | H | -5.152374000 | 3.906664000  | -0.176552000 |
| C | -6.707168000 | 2.552406000  | 2.219810000  | C | -6.535588000 | 2.601919000  | 2.170567000  |
| O | -8.125945000 | 2.927363000  | -0.920682000 | O | -8.058119000 | 2.914893000  | -0.926172000 |
| C | -6.672353000 | 3.164280000  | 1.010168000  | C | -6.554490000 | 3.217373000  | 0.961927000  |
| O | -8.423603000 | 1.654831000  | 0.925372000  | O | -8.292806000 | 1.681133000  | 0.951327000  |
| C | -7.777102000 | 2.620943000  | 0.204343000  | C | -7.676723000 | 2.643034000  | 0.194195000  |
| O | -5.959483000 | -0.068887000 | 2.943728000  | O | -5.905656000 | -0.096635000 | 3.027122000  |
| H | -5.641430000 | -0.988761000 | 2.844806000  | H | -5.719367000 | -1.057297000 | 2.996808000  |
| O | -7.112761000 | -2.340492000 | 1.949029000  | O | -7.118953000 | -2.299049000 | 2.039352000  |
| H | -6.733686000 | -2.490971000 | 1.058291000  | H | -6.738088000 | -2.514466000 | 1.162745000  |
| C | -7.679484000 | 1.404809000  | 2.137680000  | C | -7.521146000 | 1.461568000  | 2.149233000  |
| H | -8.372953000 | 1.362903000  | 2.982728000  | H | -8.189093000 | 1.465743000  | 3.016531000  |
| C | -6.935614000 | 0.067535000  | 1.936114000  | C | -6.830590000 | 0.096014000  | 1.979748000  |
| H | -6.456785000 | 0.156730000  | 0.948344000  | H | -6.309342000 | 0.156310000  | 1.012056000  |
| C | -7.874636000 | -1.150438000 | 1.920396000  | C | -7.827165000 | -1.076486000 | 1.932776000  |
| H | -8.480201000 | -1.145705000 | 2.835135000  | H | -8.487641000 | -1.021426000 | 2.806852000  |
| H | -8.547585000 | -1.092452000 | 1.053619000  | H | -8.439323000 | -1.016705000 | 1.024279000  |
| I | -2.682157000 | 6.310212000  | 1.518847000  | I | -2.391747000 | 6.628099000  | 2.413201000  |
| C | -4.970457000 | 3.656263000  | 3.484145000  | C | -4.913282000 | 3.860637000  | 3.444249000  |
| C | -5.420714000 | 5.005294000  | 4.079486000  | C | -5.609592000 | 5.128169000  | 3.999391000  |
| C | -6.219402000 | 5.781364000  | 3.022157000  | C | -6.183711000 | 5.947418000  | 2.832251000  |
| N | -6.674652000 | 7.188740000  | 3.416515000  | N | -6.779300000 | 7.311148000  | 3.196607000  |
| O | -4.311674000 | 5.718001000  | 4.582052000  | O | -4.751307000 | 5.871640000  | 4.836699000  |
| H | -3.684678000 | 5.874456000  | 3.831814000  | H | -3.938077000 | 6.094427000  | 4.316435000  |
| C | -7.333664000 | 7.185608000  | 4.764949000  | C | -7.674579000 | 7.204946000  | 4.396783000  |
| H | -8.129678000 | 6.438257000  | 4.770271000  | H | -8.421015000 | 6.429061000  | 4.214970000  |
| H | -6.583765000 | 6.947154000  | 5.518555000  | H | -7.062603000 | 6.951433000  | 5.261840000  |
| H | -7.749939000 | 8.176926000  | 4.954327000  | H | -8.166694000 | 8.166976000  | 4.552861000  |
| C | -7.661604000 | 7.636106000  | 2.370276000  | C | -7.578745000 | 7.768343000  | 2.004701000  |
| H | -7.959160000 | 8.665303000  | 2.579630000  | H | -7.960220000 | 8.772896000  | 2.197149000  |
| H | -7.180899000 | 7.573494000  | 1.392776000  | H | -6.925769000 | 7.772756000  | 1.130603000  |
| H | -8.533545000 | 6.980372000  | 2.396837000  | H | -8.406534000 | 7.076332000  | 1.841490000  |
| C | -5.518707000 | 8.168834000  | 3.427861000  | C | -5.700355000 | 8.339058000  | 3.467855000  |
| H | -4.827802000 | 7.869985000  | 4.211024000  | H | -5.154208000 | 8.032360000  | 4.354825000  |
| H | -5.007479000 | 8.120844000  | 2.465150000  | H | -5.015715000 | 8.364173000  | 2.619314000  |
| H | -5.925926000 | 9.165477000  | 3.611419000  | H | -6.186687000 | 9.306285000  | 3.612673000  |

|                                                           |              |             |             |                                                           |              |             |             |
|-----------------------------------------------------------|--------------|-------------|-------------|-----------------------------------------------------------|--------------|-------------|-------------|
| H                                                         | -4.476773000 | 3.806835000 | 2.524233000 | H                                                         | -4.382714000 | 4.059310000 | 2.512034000 |
| H                                                         | -4.275406000 | 3.199550000 | 4.191014000 | H                                                         | -4.208162000 | 3.526018000 | 4.206636000 |
| H                                                         | -7.131118000 | 5.229641000 | 2.780028000 | H                                                         | -6.991635000 | 5.387359000 | 2.358895000 |
| H                                                         | -5.632906000 | 5.893922000 | 2.109992000 | H                                                         | -5.415902000 | 6.142583000 | 2.083699000 |
| H                                                         | -6.056051000 | 4.778247000 | 4.942759000 | H                                                         | -6.421912000 | 4.773534000 | 4.643387000 |
| Zero-point correction= 0.828795 (Hartree/Particle)        |              |             |             | Zero-point correction= 0.830327 (Hartree/Particle)        |              |             |             |
| Thermal correction to Energy= 0.882367                    |              |             |             | Thermal correction to Energy= 0.884786                    |              |             |             |
| Thermal correction to Enthalpy= 0.883311                  |              |             |             | Thermal correction to Enthalpy= 0.885730                  |              |             |             |
| Thermal correction to Gibbs Free Energy= 0.737992         |              |             |             | Thermal correction to Gibbs Free Energy= 0.738351         |              |             |             |
| Sum of electronic and zero-point Energies= -2507.438690   |              |             |             | Sum of electronic and zero-point Energies= -2507.484109   |              |             |             |
| Sum of electronic and thermal Energies= -2507.385119      |              |             |             | Sum of electronic and thermal Energies= -2507.429650      |              |             |             |
| Sum of electronic and thermal Enthalpies= -2507.384174    |              |             |             | Sum of electronic and thermal Enthalpies= -2507.428705    |              |             |             |
| Sum of electronic and thermal Free Energies= -2507.529494 |              |             |             | Sum of electronic and thermal Free Energies= -2507.576085 |              |             |             |

**7b-I dimeric**

| <b>I0</b> |                                           |           |           | <b>I1</b> |                                               |           |           |
|-----------|-------------------------------------------|-----------|-----------|-----------|-----------------------------------------------|-----------|-----------|
| 104       | INT0dREALet SCF Done: -2362.44944248 A.U. |           |           | 114       | INT0dREALetINT1 SCF Done: -2555.60332299 A.U. |           |           |
| O         | -2.956287                                 | 1.291052  | 0.667314  | O         | -2.936280                                     | 1.409490  | 0.948644  |
| O         | -3.934603                                 | -0.917560 | 2.574955  | O         | -3.965371                                     | -1.180556 | 2.116765  |
| H         | -2.952944                                 | -0.817535 | 2.560256  | H         | -3.182898                                     | -0.724786 | 2.524317  |
| C         | -4.099460                                 | 0.562271  | 0.606598  | C         | -4.036161                                     | 0.712757  | 0.557953  |
| O         | -6.533578                                 | -1.713269 | 1.547747  | O         | -6.443282                                     | -1.768673 | 0.722997  |
| C         | -4.483045                                 | -0.406251 | 1.461280  | C         | -4.448318                                     | -0.445661 | 1.105513  |
| O         | -6.169494                                 | -0.223338 | -0.105585 | O         | -5.987092                                     | 0.059611  | -0.529358 |
| C         | -5.808263                                 | -0.891423 | 1.024860  | C         | -5.706328                                     | -0.842349 | 0.453504  |
| O         | -4.884310                                 | 3.023052  | -1.102292 | O         | -4.807466                                     | 3.466620  | -0.855368 |
| H         | -5.444850                                 | 3.785819  | -1.350929 | H         | -5.390372                                     | 4.248228  | -0.948305 |
| O         | -7.494386                                 | 3.575437  | -1.361952 | O         | -7.435619                                     | 3.977430  | -0.943127 |
| H         | -7.830077                                 | 3.849590  | -0.484958 | H         | -7.736398                                     | 4.094136  | -0.018809 |
| C         | -5.156424                                 | 0.747307  | -0.455937 | C         | -4.992356                                     | 1.112562  | -0.547091 |
| H         | -4.785737                                 | 0.513515  | -1.460855 | H         | -4.512872                                     | 1.109672  | -1.533232 |
| C         | -5.801507                                 | 2.138443  | -0.477455 | C         | -5.690109                                     | 2.466721  | -0.354800 |
| H         | -5.986952                                 | 2.447244  | 0.562505  | H         | -5.865795                                     | 2.619083  | 0.718201  |
| C         | -7.136784                                 | 2.203805  | -1.231244 | C         | -7.043835                                     | 2.614621  | -1.061126 |
| H         | -7.009260                                 | 1.808505  | -2.245190 | H         | -6.937273                                     | 2.400819  | -2.129983 |
| H         | -7.906509                                 | 1.622833  | -0.713276 | H         | -7.783535                                     | 1.931460  | -0.631365 |
| I         | -0.290588                                 | -0.928068 | 2.602625  | O         | -1.844009                                     | -0.168489 | 3.447614  |
| C         | -3.093219                                 | 2.608354  | 1.245600  | C         | -0.753060                                     | -1.133657 | 3.549328  |
| C         | -1.856079                                 | 2.888204  | 2.081827  | H         | 0.229868                                      | -0.673041 | 3.622183  |
| C         | -0.598163                                 | 2.733417  | 1.221114  | H         | -0.858873                                     | -1.981224 | 2.873695  |
| N         | 0.645588                                  | 3.449173  | 1.741242  | C         | -1.687780                                     | -0.982995 | 4.666506  |
| O         | -1.815996                                 | 2.050562  | 3.232069  | H         | -1.346522                                     | -0.378376 | 5.500549  |
| H         | -1.512509                                 | 1.134940  | 2.992961  | I         | 1.065574                                      | 1.646979  | 5.666827  |
| C         | 0.413386                                  | 4.963819  | 1.818870  | C         | -2.794715                                     | -1.957424 | 4.957770  |
| H         | -0.250570                                 | 5.142910  | 2.667469  | H         | -2.478989                                     | -2.626725 | 5.765948  |
| H         | 1.387042                                  | 5.398800  | 2.050607  | H         | -3.689112                                     | -1.419582 | 5.286006  |
| C         | 1.786804                                  | 3.168581  | 0.762244  | H         | -3.051735                                     | -2.558469 | 4.080653  |
| H         | 2.590785                                  | 3.859376  | 1.025906  | C         | -3.231130                                     | 2.666347  | 1.617630  |
| H         | 1.411083                                  | 3.460745  | -0.219903 | C         | -1.971155                                     | 3.212848  | 2.258947  |
| C         | 0.984287                                  | 2.929824  | 3.142617  | C         | -0.778971                                     | 3.100344  | 1.294462  |
| H         | 0.140597                                  | 3.206197  | 3.772588  | N         | 0.222427                                      | 4.240730  | 1.394213  |
| H         | 0.985110                                  | 1.839182  | 3.074766  | O         | -1.664744                                     | 2.646598  | 3.515949  |
| H         | -3.968322                                 | 2.640124  | 1.900124  | H         | -1.531509                                     | 1.676929  | 3.440047  |
| H         | -3.232395                                 | 3.343846  | 0.449481  | C         | -0.404225                                     | 5.557465  | 0.907144  |
| H         | -0.776206                                 | 3.119695  | 0.217690  | H         | -1.058964                                     | 5.909475  | 1.708310  |
| H         | -0.356489                                 | 1.673330  | 1.142231  | H         | 0.426826                                      | 6.260167  | 0.824962  |
| H         | -1.966827                                 | 3.913002  | 2.451323  | C         | 1.418799                                      | 3.907135  | 0.510202  |
| O         | -5.485769                                 | 3.473918  | 5.100624  | H         | 2.034768                                      | 4.807587  | 0.481650  |
| O         | -6.023779                                 | 4.797209  | 2.270307  | H         | 1.018514                                      | 3.749228  | -0.493584 |
| H         | -5.278429                                 | 5.205805  | 2.766450  | C         | 0.643788                                      | 4.416141  | 2.860995  |
| C         | -6.411973                                 | 3.210206  | 4.142683  | H         | -0.253241                                     | 4.747897  | 3.383514  |
| O         | -8.382765                                 | 3.442133  | 1.306058  | H         | 0.889323                                      | 3.426632  | 3.248573  |
| C         | -6.629529                                 | 3.814405  | 2.955656  | H         | -3.978628                                     | 2.497198  | 2.397235  |
| O         | -8.272217                                 | 2.197992  | 3.182252  | H         | -3.625385                                     | 3.376935  | 0.888989  |

|   |           |           |           |   |           |           |           |
|---|-----------|-----------|-----------|---|-----------|-----------|-----------|
| C | -7.826675 | 3.183381  | 2.352169  | H | -1.097063 | 3.048473  | 0.253792  |
| O | -5.749290 | 0.555745  | 5.226574  | H | -0.242345 | 2.181510  | 1.525406  |
| H | -5.565977 | -0.406469 | 5.233403  | H | -2.204104 | 4.259920  | 2.476525  |
| O | -6.882457 | -1.690780 | 4.325544  | O | -4.954354 | 2.960139  | 5.200768  |
| H | -6.559839 | -1.914333 | 3.427333  | O | -5.730366 | 4.608581  | 2.748001  |
| C | -7.369462 | 2.059147  | 4.299225  | H | -4.976840 | 4.963968  | 3.275598  |
| H | -7.948070 | 2.106790  | 5.228500  | C | -5.953583 | 2.705883  | 4.320981  |
| C | -6.679644 | 0.692984  | 4.166230  | O | -8.161095 | 3.425698  | 1.739432  |
| H | -6.159372 | 0.703447  | 3.195380  | C | -6.290795 | 3.518926  | 3.293979  |
| C | -7.646297 | -0.500175 | 4.198299  | O | -7.938091 | 1.914492  | 3.392612  |
| H | -8.279274 | -0.429775 | 5.091254  | C | -7.537156 | 3.012938  | 2.695488  |
| H | -8.283964 | -0.506423 | 3.307362  | O | -5.951284 | -0.450899 | 5.244795  |
| I | -2.927325 | 6.537113  | 3.280326  | H | -5.992483 | -1.408254 | 5.039747  |
| C | -4.144265 | 3.067190  | 4.771305  | O | -7.062874 | -2.095485 | 3.487355  |
| C | -3.317422 | 3.141796  | 6.055620  | H | -6.628532 | -2.216288 | 2.618846  |
| C | -3.413911 | 4.567925  | 6.592897  | C | -6.962093 | 1.569675  | 4.404380  |
| N | -2.636264 | 4.896346  | 7.870738  | H | -7.470227 | 1.537101  | 5.374837  |
| O | -1.964314 | 2.798326  | 5.813395  | C | -6.457462 | 0.152550  | 4.061927  |
| H | -1.876725 | 2.427920  | 4.903489  | H | -5.663857 | 0.235612  | 3.306446  |
| C | -3.007406 | 3.912783  | 8.988445  | C | -7.566998 | -0.765875 | 3.512374  |
| H | -2.908546 | 4.460616  | 9.926609  | H | -8.420996 | -0.751625 | 4.198907  |
| H | -4.068325 | 3.698133  | 8.838553  | H | -7.904580 | -0.438549 | 2.525996  |
| C | -3.129166 | 6.290902  | 8.274076  | I | -2.987574 | 6.660544  | 3.722285  |
| H | -3.117330 | 6.890780  | 7.361945  | C | -4.015918 | 1.907358  | 5.537378  |
| H | -4.174242 | 6.153956  | 8.564842  | C | -3.171467 | 2.395003  | 6.719229  |
| C | -1.123469 | 4.899292  | 7.646250  | C | -2.413713 | 3.682258  | 6.375358  |
| H | -0.874720 | 3.893843  | 7.321162  | N | -1.994139 | 4.526098  | 7.582525  |
| H | -0.681638 | 5.083648  | 8.628662  | O | -2.322120 | 1.337910  | 7.140750  |
| H | -3.727839 | 3.744611  | 4.021649  | H | -1.454473 | 1.411311  | 6.684886  |
| H | -4.143853 | 2.038060  | 4.410415  | C | -3.216684 | 4.966454  | 8.386915  |
| H | -4.460114 | 4.784449  | 6.817678  | H | -3.541495 | 4.093355  | 8.956983  |
| H | -3.082597 | 5.270059  | 5.825966  | H | -2.851140 | 5.705059  | 9.102029  |
| H | -3.770438 | 2.432613  | 6.762216  | C | -1.288193 | 5.783493  | 7.064175  |
| C | 2.297388  | 1.731145  | 0.732896  | H | -1.221170 | 6.467769  | 7.912802  |
| H | 1.514023  | 0.994778  | 0.539995  | H | -1.954024 | 6.219609  | 6.318628  |
| H | 3.032378  | 1.661853  | -0.076047 | C | -1.062113 | 3.706773  | 8.477356  |
| H | 2.795968  | 1.443618  | 1.661291  | H | -1.627926 | 2.825524  | 8.778852  |
| C | -0.181144 | 5.614082  | 0.576896  | H | -0.255695 | 3.352602  | 7.831303  |
| H | 0.414857  | 5.448906  | -0.326003 | H | -3.383053 | 1.704824  | 4.672952  |
| H | -1.213143 | 5.303113  | 0.401245  | H | -4.540768 | 1.000546  | 5.837899  |
| H | -0.219500 | 6.690244  | 0.768624  | H | -3.010783 | 4.328789  | 5.733984  |
| C | 2.285126  | 3.457600  | 3.735423  | H | -1.509286 | 3.427172  | 5.824174  |
| H | 2.401647  | 2.986833  | 4.717078  | H | -3.871356 | 2.570684  | 7.544160  |
| H | 3.167587  | 3.193828  | 3.146284  | C | -0.510373 | 4.444937  | 9.690641  |
| H | 2.274458  | 4.540485  | 3.890287  | H | -1.286803 | 4.737651  | 10.403638 |
| C | -0.623068 | 5.897774  | 6.610883  | H | 0.164660  | 3.755141  | 10.207314 |
| H | 0.466801  | 5.792573  | 6.564968  | H | 0.073371  | 5.329970  | 9.422952  |
| H | -1.022941 | 5.697537  | 5.614177  | C | -4.369435 | 5.539865  | 7.567610  |
| H | -0.841910 | 6.939636  | 6.859464  | H | -4.858421 | 4.782027  | 6.951272  |
| C | -2.350322 | 6.987689  | 9.384112  | H | -5.110332 | 5.933206  | 8.271831  |
| H | -2.873413 | 7.921782  | 9.612875  | H | -4.059796 | 6.358137  | 6.911986  |
| H | -2.303342 | 6.406656  | 10.309952 | C | 0.084666  | 5.552045  | 6.448718  |
| H | -1.332753 | 7.247848  | 9.083757  | H | 0.851928  | 5.308301  | 7.188135  |
| C | -2.191652 | 2.623050  | 9.069965  | H | 0.082608  | 4.754686  | 5.703768  |
| H | -1.182909 | 2.805551  | 9.450069  | H | 0.370015  | 6.482544  | 5.947281  |
| H | -2.697345 | 1.964124  | 9.783484  | C | 1.778416  | 5.403298  | 3.094298  |
| H | -2.110697 | 2.098917  | 8.116986  | H | 1.974501  | 5.403218  | 4.170436  |
|   |           |           |           | H | 2.712113  | 5.116061  | 2.602404  |
|   |           |           |           | H | 1.518811  | 6.425872  | 2.805629  |
|   |           |           |           | C | -1.178953 | 5.489531  | -0.404277 |
|   |           |           |           | H | -0.590547 | 5.096431  | -1.239717 |
|   |           |           |           | H | -2.106707 | 4.916908  | -0.321787 |
|   |           |           |           | H | -1.462848 | 6.516122  | -0.657113 |
|   |           |           |           | C | 2.253821  | 2.706745  | 0.947948  |
|   |           |           |           | H | 1.703062  | 1.764767  | 0.893184  |
|   |           |           |           | H | 3.103030  | 2.628030  | 0.261131  |
|   |           |           |           | H | 2.650395  | 2.812269  | 1.960468  |

|                                              |                             |                                              |                             |
|----------------------------------------------|-----------------------------|----------------------------------------------|-----------------------------|
| Zero-point correction=                       | 0.896504 (Hartree/Particle) | Zero-point correction=                       | 0.986129 (Hartree/Particle) |
| Thermal correction to Energy=                | 0.951554                    | Thermal correction to Energy=                | 1.046849                    |
| Thermal correction to Enthalpy=              | 0.952498                    | Thermal correction to Enthalpy=              | 1.047793                    |
| Thermal correction to Gibbs Free Energy=     | 0.802302                    | Thermal correction to Gibbs Free Energy=     | 0.887943                    |
| Sum of electronic and zero-point Energies=   | -2361.552939                | Sum of electronic and zero-point Energies=   | -2554.617194                |
| Sum of electronic and thermal Energies=      | -2361.497889                | Sum of electronic and thermal Energies=      | -2554.556474                |
| Sum of electronic and thermal Enthalpies=    | -2361.496944                | Sum of electronic and thermal Enthalpies=    | -2554.555530                |
| Sum of electronic and thermal Free Energies= | -2361.647141                | Sum of electronic and thermal Free Energies= | -2554.715380                |

| TS1                                          | I2                                            |
|----------------------------------------------|-----------------------------------------------|
| 114                                          | 114                                           |
| INT0dREALetTS1 SCF Done: -2555.56323015 A.U. | INT0dREALetINT2 SCF Done: -2555.58496790 A.U. |
| O -3.147602 0.590832 -0.762862               | O -2.997551 1.205427 1.049988                 |
| O -3.472769 -1.114473 1.818757               | O -4.311567 -0.980991 2.796532                |
| H -2.816475 -0.356318 1.877523               | H -3.287209 -0.271172 3.511417                |
| C -4.046410 -0.395002 -0.485437              | C -4.151688 0.480609 0.835586                 |
| O -5.670080 -2.874628 1.303496               | O -6.771709 -1.700098 1.395628                |
| C -4.120378 -1.121605 0.652524               | C -4.666988 -0.478092 1.657636                |
| O -5.748399 -1.964569 -0.758294              | O -6.113811 -0.233223 -0.180015               |
| C -5.224252 -2.091316 0.489535               | C -5.941301 -0.908367 0.992899                |
| O -5.644668 0.828727 -3.031986               | O -4.673254 2.996306 -0.995228                |
| H -6.442327 1.248748 -3.413348               | H -5.204162 3.770122 -1.273354                |
| O -8.305123 0.574274 -2.834130               | O -7.249387 3.637078 -1.369865                |
| H -8.610226 1.111520 -2.076634               | H -7.561027 3.933149 -0.491643                |
| C -5.091347 -0.889435 -1.467640              | C -5.040700 0.721254 -0.354640                |
| H -4.637174 -1.307934 -2.373826              | H -4.555879 0.513408 -1.317746                |
| C -6.154748 0.135726 -1.897932               | C -5.650189 2.130259 -0.421391                |
| H -6.328473 0.838975 -1.071044               | H -5.879720 2.447816 0.606130                 |
| C -7.514030 -0.469890 -2.275389              | C -6.942731 2.249836 -1.235866                |
| H -7.383198 -1.227996 -3.054623              | H -6.789404 1.860219 -2.248079                |
| H -7.993807 -0.929307 -1.406080              | H -7.754423 1.690716 -0.758799                |
| O -1.852721 0.919662 1.907420                | O -2.472794 0.152444 4.036137                 |
| C -0.230850 0.507945 1.207851                | C -1.148768 -1.039576 2.448488                |
| H -0.199823 -0.570849 1.134822               | H -1.350743 -0.164047 1.839230                |
| C -0.561338 1.140784 2.481865                | H -1.733080 -1.881758 2.080388                |
| H -0.322543 2.205333 2.554843                | C -1.379205 -0.753342 3.940088                |
| I 2.582334 0.836658 0.723702                 | H -0.509907 -0.226944 4.351879                |
| C -0.293681 0.393074 3.766117                | I 0.983796 -1.552674 1.985786                 |
| H 0.768753 0.459356 4.021484                 | C -1.655404 -2.023373 4.738754                |
| H -0.887194 0.826054 4.578349                | H -0.822254 -2.730692 4.658768                |
| H -0.566788 -0.662367 3.659698               | H -1.809654 -1.773247 5.792736                |
| C -3.697957 1.908708 -0.995216               | H -2.565919 -2.497932 4.356885                |
| C -2.574878 2.927170 -0.877469               | C -3.205983 2.507868 1.627695                 |
| C -1.477455 2.596092 -1.899360               | C -1.875689 3.026896 2.161900                 |
| N -0.401632 3.661130 -2.104523               | C -0.832464 2.832088 1.051670                 |
| O -2.062565 3.015707 0.440973                | N 0.534516 3.479218 1.273810                  |
| H -2.079836 2.116807 0.913464                | O -1.466978 2.415415 3.377969                 |
| C -1.035161 5.031506 -2.363651               | H -1.919906 1.514244 3.515682                 |
| H -1.518039 5.334514 -1.432064               | C 0.384077 4.954247 1.662307                  |
| H -0.201276 5.710422 -2.548773               | H -0.108880 4.974107 2.636443                 |
| C 0.440137 3.259778 -3.315377                | H 1.399476 5.334912 1.786079                  |
| H 1.118645 4.094956 -3.498742                | C 1.322228 3.387450 -0.029874                 |
| H -0.250644 3.204792 -4.158331               | H 2.229704 3.976517 0.119857                  |
| C 0.480479 3.754123 -0.847792                | H 0.719430 3.896939 -0.782348                 |
| H -0.187454 4.070103 -0.050328               | C 1.260168 2.733390 2.401159                  |
| H 0.810490 2.741115 -0.613284                | H 0.647470 2.883594 3.287136                  |
| H -4.456855 2.130739 -0.239705               | H 1.195375 1.672010 2.154898                  |
| H -4.173903 1.951080 -1.978565               | H -3.932258 2.437651 2.441080                 |
| H -1.932653 2.428300 -2.877600               | H -3.593697 3.191831 0.867363                 |
| H -0.967569 1.679809 -1.607473               | H -1.221791 3.234398 0.114659                 |
| H -3.035575 3.893657 -1.101843               | H -0.652455 1.769127 0.910573                 |
| H -0.276723 1.078226 0.300388                | H -2.024670 4.091142 2.371327                 |
| O -5.713057 3.353041 2.956854                | O -5.374363 3.369885 5.355642                 |
| O -6.760910 3.460313 -0.055960               | O -5.606064 4.880184 2.563866                 |
| H -6.167145 4.215186 0.152264                | H -4.911352 5.255127 3.148011                 |
| C -6.606312 2.588682 2.275128                | C -6.239805 3.229922 4.316361                 |
| O -8.765830 1.407291 -0.161896               | O -7.996314 3.779617 1.382919                 |

|                                                           |           |           |           |                                                           |           |           |           |
|-----------------------------------------------------------|-----------|-----------|-----------|-----------------------------------------------------------|-----------|-----------|-----------|
| C                                                         | -7.053520 | 2.685477  | 1.004389  | C                                                         | -6.331548 | 3.913433  | 3.155234  |
| O                                                         | -8.239680 | 0.955333  | 1.983769  | O                                                         | -8.125641 | 2.450021  | 3.200834  |
| C                                                         | -8.098841 | 1.651539  | 0.820631  | C                                                         | -7.536789 | 3.421211  | 2.446379  |
| O                                                         | -5.185675 | 0.635773  | 3.924698  | O                                                         | -5.692425 | 0.518958  | 5.074458  |
| H                                                         | -4.758883 | -0.210552 | 4.170316  | H                                                         | -5.418958 | -0.402554 | 4.894478  |
| O                                                         | -5.821320 | -1.965097 | 3.976292  | O                                                         | -7.085408 | -1.631565 | 4.192223  |
| H                                                         | -5.536816 | -2.388057 | 3.138956  | H                                                         | -6.776082 | -1.822839 | 3.280650  |
| C                                                         | -7.236126 | 1.385297  | 2.927322  | C                                                         | -7.289500 | 2.151284  | 4.339232  |
| H                                                         | -7.721924 | 1.616049  | 3.881403  | H                                                         | -7.906788 | 2.175655  | 5.244305  |
| C                                                         | -6.243316 | 0.222614  | 3.080457  | C                                                         | -6.696281 | 0.751468  | 4.103972  |
| H                                                         | -5.869667 | 0.016605  | 2.066451  | H                                                         | -6.253843 | 0.785631  | 3.098670  |
| C                                                         | -6.866375 | -1.061606 | 3.649876  | C                                                         | -7.738931 | -0.378310 | 4.161183  |
| H                                                         | -7.388052 | -0.827948 | 4.585881  | H                                                         | -8.303614 | -0.292620 | 5.098728  |
| H                                                         | -7.583788 | -1.489612 | 2.939913  | H                                                         | -8.439031 | -0.287098 | 3.319670  |
| I                                                         | -4.475557 | 6.299717  | -0.571564 | I                                                         | -2.541767 | 6.618466  | 3.768828  |
| C                                                         | -4.344172 | 3.221018  | 2.527581  | C                                                         | -4.007737 | 3.028064  | 5.056319  |
| C                                                         | -3.486614 | 4.203560  | 3.332821  | C                                                         | -3.183730 | 3.187505  | 6.332412  |
| C                                                         | -4.055472 | 5.603911  | 3.080967  | C                                                         | -3.391863 | 4.613897  | 6.846135  |
| N                                                         | -3.425439 | 6.789874  | 3.805994  | N                                                         | -2.832741 | 4.939098  | 8.227601  |
| O                                                         | -2.130066 | 4.073520  | 2.949995  | O                                                         | -1.818268 | 2.911866  | 6.079439  |
| H                                                         | -2.099479 | 3.904552  | 1.981433  | H                                                         | -1.660467 | 2.903063  | 5.107008  |
| C                                                         | -3.668233 | 6.626349  | 5.301749  | C                                                         | -3.395865 | 3.987069  | 9.277823  |
| H                                                         | -4.726251 | 6.381765  | 5.412223  | H                                                         | -2.944325 | 3.015719  | 9.068632  |
| H                                                         | -3.094986 | 5.746643  | 5.600216  | H                                                         | -3.006733 | 4.325662  | 10.239974 |
| C                                                         | -4.082294 | 8.058029  | 3.250556  | C                                                         | -3.242991 | 6.384263  | 8.503457  |
| H                                                         | -3.506709 | 8.896224  | 3.650735  | H                                                         | -2.893563 | 6.958582  | 7.643481  |
| H                                                         | -3.934465 | 8.015842  | 2.169378  | H                                                         | -4.333375 | 6.399531  | 8.473391  |
| C                                                         | -1.913479 | 6.880955  | 3.562664  | C                                                         | -1.307313 | 4.785206  | 8.263771  |
| H                                                         | -1.493735 | 5.959944  | 3.961487  | H                                                         | -1.113827 | 3.756223  | 7.966223  |
| H                                                         | -1.569674 | 7.728650  | 4.158592  | H                                                         | -1.020756 | 4.918718  | 9.310063  |
| H                                                         | -4.264537 | 3.474405  | 1.466783  | H                                                         | -3.614243 | 3.705807  | 4.293100  |
| H                                                         | -3.990316 | 2.202174  | 2.701612  | H                                                         | -3.957814 | 1.988307  | 4.732189  |
| H                                                         | -5.108470 | 5.600840  | 3.360284  | H                                                         | -4.457358 | 4.836286  | 6.888231  |
| H                                                         | -4.000566 | 5.828118  | 2.013914  | H                                                         | -2.940388 | 5.314191  | 6.142028  |
| H                                                         | -3.550879 | 3.928980  | 4.391624  | H                                                         | -3.555752 | 2.448897  | 7.053920  |
| C                                                         | 1.212984  | 1.952057  | -3.173397 | C                                                         | -0.536856 | 5.729854  | 7.352697  |
| H                                                         | 1.889667  | 1.933134  | -2.314232 | H                                                         | 0.521352  | 5.456995  | 7.427932  |
| H                                                         | 0.552925  | 1.083612  | -3.104224 | H                                                         | -0.834090 | 5.631604  | 6.305956  |
| H                                                         | 1.817267  | 1.828958  | -4.078354 | H                                                         | -0.627064 | 6.780103  | 7.644295  |
| C                                                         | 1.700363  | 4.657745  | -0.954061 | C                                                         | -2.733725 | 6.984092  | 9.807909  |
| H                                                         | 2.223230  | 4.576549  | 0.004098  | H                                                         | -3.107229 | 8.011518  | 9.864849  |
| H                                                         | 2.408837  | 4.329782  | -1.719345 | H                                                         | -3.101408 | 6.455388  | 10.692299 |
| H                                                         | 1.452161  | 5.710755  | -1.117703 | H                                                         | -1.642507 | 7.031291  | 9.852793  |
| C                                                         | -2.039068 | 5.103822  | -3.507994 | C                                                         | -4.915602 | 3.868036  | 9.317141  |
| H                                                         | -1.592488 | 4.892695  | -4.483977 | H                                                         | -5.328946 | 3.460598  | 8.391083  |
| H                                                         | -2.903656 | 4.454515  | -3.354942 | H                                                         | -5.171266 | 3.176017  | 10.126053 |
| H                                                         | -2.429252 | 6.125565  | -3.524053 | H                                                         | -5.408079 | 4.820157  | 9.535522  |
| C                                                         | -5.568671 | 8.220744  | 3.545207  | C                                                         | -0.388332 | 5.822750  | 0.677456  |
| H                                                         | -6.171015 | 7.443882  | 3.068996  | H                                                         | 0.118333  | 5.932888  | -0.285920 |
| H                                                         | -5.800037 | 8.254559  | 4.613813  | H                                                         | -1.409476 | 5.471082  | 0.515992  |
| H                                                         | -5.880474 | 9.175174  | 3.109188  | H                                                         | -0.482022 | 6.811643  | 1.134635  |
| C                                                         | -1.489449 | 7.053695  | 2.109422  | C                                                         | 2.709777  | 3.138856  | 2.637172  |
| H                                                         | -0.398235 | 6.960619  | 2.083112  | H                                                         | 2.820811  | 4.186925  | 2.928711  |
| H                                                         | -1.910116 | 6.288453  | 1.456014  | H                                                         | 3.079351  | 2.529874  | 3.468749  |
| H                                                         | -1.751450 | 8.032619  | 1.701036  | H                                                         | 3.358669  | 2.939786  | 1.779423  |
| C                                                         | -3.304028 | 7.819405  | 6.179766  | C                                                         | 1.661386  | 1.976310  | -0.499617 |
| H                                                         | -3.879832 | 8.715385  | 5.933691  | H                                                         | 2.281750  | 1.425707  | 0.211457  |
| H                                                         | -3.541478 | 7.551147  | 7.214296  | H                                                         | 0.771931  | 1.378715  | -0.711653 |
| H                                                         | -2.239530 | 8.064497  | 6.145487  | H                                                         | 2.225796  | 2.067068  | -1.433508 |
| Zero-point correction= 0.983392 (Hartree/Particle)        |           |           |           | Zero-point correction= 0.983936 (Hartree/Particle)        |           |           |           |
| Thermal correction to Energy= 1.043811                    |           |           |           | Thermal correction to Energy= 1.044173                    |           |           |           |
| Thermal correction to Enthalpy= 1.044756                  |           |           |           | Thermal correction to Enthalpy= 1.045117                  |           |           |           |
| Thermal correction to Gibbs Free Energy= 0.882277         |           |           |           | Thermal correction to Gibbs Free Energy= 0.882881         |           |           |           |
| Sum of electronic and zero-point Energies= -2554.579838   |           |           |           | Sum of electronic and zero-point Energies= -2554.601032   |           |           |           |
| Sum of electronic and thermal Energies= -2554.519419      |           |           |           | Sum of electronic and thermal Energies= -2554.540795      |           |           |           |
| Sum of electronic and thermal Enthalpies= -2554.518475    |           |           |           | Sum of electronic and thermal Enthalpies= -2554.539851    |           |           |           |
| Sum of electronic and thermal Free Energies= -2554.680953 |           |           |           | Sum of electronic and thermal Free Energies= -2554.702087 |           |           |           |

| TS2                                          | I3                                            |
|----------------------------------------------|-----------------------------------------------|
| 117                                          | 117                                           |
| INT0dREALetTS2 SCF Done: -2744.17437977 A.U. | INT0dREALetINT3 SCF Done: -2744.17336580 A.U. |
| O -2.730922 0.867311 1.224629                | O -2.520521 0.918890 1.630999                 |
| O -4.241954 -1.478534 2.562840               | O -4.234597 -1.003794 3.297468                |
| H -3.326401 -1.213891 3.006209               | H -2.797435 -0.780949 3.913394                |
| C -3.872224 0.237640 0.842125                | C -3.658726 0.236181 1.283234                 |
| O -6.659670 -1.796763 0.982736               | O -6.552915 -1.632746 1.526006                |
| C -4.509272 -0.778377 1.455584               | C -4.397506 -0.588877 2.075241                |
| O -5.822498 -0.161522 -0.353901              | O -5.527561 -0.298225 0.030615                |
| C -5.772418 -1.021424 0.720439               | C -5.597786 -0.936853 1.244256                |
| O -4.147524 3.070268 -0.025834               | O -3.654231 2.835140 -0.199597                |
| H -4.581492 3.937385 -0.165908               | H -4.030602 3.674464 -0.537885                |
| O -6.482916 4.023908 -0.923874               | O -5.906194 3.763293 -1.279552                |
| H -7.077360 4.097270 -0.149773               | H -6.474047 4.019204 -0.523068                |
| C -4.697907 0.740779 -0.309840               | C -4.357236 0.544256 -0.002866                |
| H -4.173348 0.700053 -1.272200               | H -3.784458 0.299860 -0.907729                |
| C -5.238267 2.157701 -0.067141               | C -4.811673 2.008609 -0.069004                |
| H -5.746702 2.127545 0.908432                | H -5.321243 2.226160 0.880434                 |
| C -6.244618 2.635094 -1.121983               | C -5.771999 2.344876 -1.213959                |
| H -5.805781 2.530315 -2.121133               | H -5.341491 2.024039 -2.169524                |
| H -7.163378 2.040751 -1.070735               | H -6.733959 1.841575 -1.068541                |
| O -2.023309 -0.909118 3.667388               | O -1.838068 -0.698808 4.262220                |
| C -0.876750 -1.871200 1.888536               | C -1.110846 -1.863939 2.324211                |
| H -0.623760 -0.852271 1.606311               | H -0.849713 -0.879459 1.947716                |
| H -1.724417 -2.227299 1.302436               | H -2.057602 -2.183661 1.890658                |
| C -1.132645 -1.980108 3.397364               | C -1.137648 -1.879247 3.855675                |
| H -0.182801 -1.806947 3.929033               | H -0.117733 -1.769950 4.240741                |
| I 0.864094 -3.086757 1.179486                | I 0.425226 -3.222869 1.455187                 |
| C -1.709995 -3.333031 3.813071               | C -1.805194 -3.121019 4.437657                |
| H -1.014841 -4.146801 3.582732               | H -1.282781 -4.033520 4.133092                |
| H -1.918601 -3.336438 4.885711               | H -1.806835 -3.061445 5.530465                |
| H -2.653011 -3.514522 3.285379               | H -2.844031 -3.167737 4.092827                |
| C -2.917485 1.663988 2.407368                | C -2.732582 1.845191 2.702274                 |
| C -1.564680 2.248338 2.786970                | C -1.370311 2.444874 3.016917                 |
| C -1.152985 3.152186 1.621763                | C -0.976828 3.328455 1.791910                 |
| N 0.237746 3.783872 1.709198                 | N 0.407615 3.164647 1.182439                  |
| O -0.603091 1.254659 3.059699                | O -0.428307 1.433279 3.322148                 |
| H -1.104484 0.436107 3.367913                | H -0.922409 0.662630 3.710822                 |
| C 0.468867 4.222991 3.160480                 | C 1.503945 3.297416 2.241185                  |
| H 0.714454 3.307247 3.701265                 | H 1.324251 2.479167 2.936460                  |
| H -0.501648 4.581538 3.507151                | H 2.447523 3.113719 1.722655                  |
| C 0.248548 5.007823 0.795828                 | C 0.526761 4.261145 0.131315                  |
| H 1.266796 5.398239 0.809896                 | H -0.311144 4.113446 -0.551522                |
| H -0.411362 5.734640 1.277402                | H 0.355507 5.204923 0.651267                  |
| C 1.240392 2.718762 1.259185                 | C 0.542444 1.771527 0.543943                  |
| H 0.989434 1.836120 1.847899                 | H 0.284283 1.086175 1.347795                  |
| H 0.988250 2.505607 0.219107                 | H 1.602260 1.651519 0.306905                  |
| H -3.292390 1.039419 3.219680                | H -3.149996 1.324144 3.565825                 |
| H -3.631955 2.464162 2.193565                | H -3.432986 2.629246 2.388256                 |
| H -1.865878 3.976418 1.565586                | H -1.069270 4.375940 2.080551                 |
| H -1.189569 2.585814 0.693444                | H -1.680406 3.151290 0.979189                 |
| H -1.728974 2.864437 3.680337                | H -1.478896 3.117088 3.879673                 |
| O -5.469289 3.591674 5.223337                | O -5.637810 3.524125 5.333707                 |
| O -6.012138 4.894052 2.386767                | O -5.329832 4.794578 2.413698                 |
| H -5.208719 5.260765 2.819337                | H -4.671064 5.132209 3.053915                 |
| C -6.286641 3.211181 4.199461                | C -6.294273 3.302956 4.165705                 |
| O -8.131922 3.327146 1.274399                | O -7.586329 3.728673 0.982732                 |
| C -6.512241 3.821790 3.017745                | C -6.177464 3.896254 2.958962                 |
| O -7.975317 2.031183 3.116768                | O -8.052788 2.544917 2.846457                 |
| C -7.605255 3.084989 2.339631                | C -7.301398 3.417505 2.121845                 |
| O -5.455024 0.550532 5.288443                | O -5.746330 0.664975 4.900713                 |
| H -5.340007 -0.418695 5.405516               | H -5.254573 -0.123716 4.564236                |
| O -6.389885 -1.741263 4.395760               | O -7.361868 -1.539571 4.230656                |
| H -5.777305 -1.903977 3.647825               | H -6.993803 -1.732906 3.343637                |
| C -7.116471 1.953723 4.275969                | C -7.378525 2.263917 4.095464                 |
| H -7.742225 1.918013 5.174879                | H -8.106648 2.359678 4.908444                 |

|                                                           |           |           |           |                                                           |           |           |           |
|-----------------------------------------------------------|-----------|-----------|-----------|-----------------------------------------------------------|-----------|-----------|-----------|
| C                                                         | -6.301691 | 0.654887  | 4.155249  | C                                                         | -6.813829 | 0.826722  | 3.990490  |
| H                                                         | -5.704562 | 0.740464  | 3.234387  | H                                                         | -6.439905 | 0.756031  | 2.960020  |
| C                                                         | -7.182038 | -0.609142 | 4.070796  | C                                                         | -7.899186 | -0.240186 | 4.207723  |
| H                                                         | -7.970576 | -0.556971 | 4.830889  | H                                                         | -8.351819 | -0.073791 | 5.194340  |
| H                                                         | -7.644714 | -0.692502 | 3.082459  | H                                                         | -8.685375 | -0.111501 | 3.444250  |
| I                                                         | -2.797005 | 6.534607  | 3.041804  | I                                                         | -2.237209 | 6.323826  | 4.024376  |
| C                                                         | -4.083660 | 3.236927  | 5.060600  | C                                                         | -4.234217 | 3.218533  | 5.347440  |
| C                                                         | -3.331651 | 3.656195  | 6.324322  | C                                                         | -3.642705 | 3.671593  | 6.685669  |
| C                                                         | -3.491936 | 5.162166  | 6.465715  | C                                                         | -4.232521 | 5.038930  | 7.061213  |
| N                                                         | -2.951876 | 5.825192  | 7.726889  | N                                                         | -3.646761 | 5.725631  | 8.304196  |
| O                                                         | -1.953949 | 3.342972  | 6.185142  | O                                                         | -2.224414 | 3.670306  | 6.598461  |
| H                                                         | -1.874563 | 2.374589  | 6.068360  | H                                                         | -1.970248 | 4.283924  | 5.873796  |
| C                                                         | -3.511551 | 5.155137  | 8.976643  | C                                                         | -3.611591 | 4.694424  | 9.429367  |
| H                                                         | -3.072214 | 4.155950  | 8.995838  | H                                                         | -4.618862 | 4.268755  | 9.465686  |
| H                                                         | -3.106553 | 5.704821  | 9.828453  | H                                                         | -2.927056 | 3.916995  | 9.090332  |
| C                                                         | -3.382354 | 7.288977  | 7.629086  | C                                                         | -4.596369 | 6.859899  | 8.671673  |
| H                                                         | -3.032010 | 7.635115  | 6.654530  | H                                                         | -4.148375 | 7.383837  | 9.514419  |
| H                                                         | -4.472420 | 7.280943  | 7.588494  | H                                                         | -5.512946 | 6.380444  | 9.027830  |
| C                                                         | -1.424125 | 5.707161  | 7.806574  | C                                                         | -2.231164 | 6.257662  | 7.985799  |
| H                                                         | -1.220225 | 4.638266  | 7.779077  | H                                                         | -1.574724 | 5.396283  | 8.093832  |
| H                                                         | -1.146219 | 6.102645  | 8.786474  | H                                                         | -2.238420 | 6.518884  | 6.926094  |
| H                                                         | -3.663669 | 3.765514  | 4.199612  | H                                                         | -3.725459 | 3.756404  | 4.542849  |
| H                                                         | -3.995543 | 2.157080  | 4.945208  | H                                                         | -4.108473 | 2.143499  | 5.234997  |
| H                                                         | -4.552747 | 5.403923  | 6.416199  | H                                                         | -5.301118 | 4.917826  | 7.246632  |
| H                                                         | -3.014103 | 5.651353  | 5.615672  | H                                                         | -4.094085 | 5.731658  | 6.231891  |
| H                                                         | -3.778764 | 3.117754  | 7.173183  | H                                                         | -3.892661 | 2.922861  | 7.439803  |
| C                                                         | -2.554927 | -0.474475 | 5.638256  | C                                                         | -1.577072 | 0.782680  | 6.575400  |
| O                                                         | -3.213850 | -1.397583 | 5.960711  | O                                                         | -2.717727 | 0.678505  | 6.819464  |
| O                                                         | -2.014089 | 0.581214  | 5.757409  | O                                                         | -0.431806 | 0.901444  | 6.377112  |
| C                                                         | 2.716944  | 3.066231  | 1.385981  | C                                                         | -3.191174 | 5.181846  | 10.810949 |
| H                                                         | 3.038532  | 3.133149  | 2.428093  | H                                                         | -3.812917 | 5.995876  | 11.192635 |
| H                                                         | 3.281508  | 2.248800  | 0.925184  | H                                                         | -3.303977 | 4.336700  | 11.497933 |
| H                                                         | 2.993949  | 3.988765  | 0.866228  | H                                                         | -2.143246 | 5.486267  | 10.841838 |
| C                                                         | -0.208659 | 4.760912  | -0.638725 | C                                                         | -4.901877 | 7.830487  | 7.532474  |
| H                                                         | 0.421991  | 4.043550  | -1.172568 | H                                                         | -3.999975 | 8.185900  | 7.027066  |
| H                                                         | -1.249064 | 4.432227  | -0.697289 | H                                                         | -5.558283 | 7.392999  | 6.777632  |
| H                                                         | -0.137322 | 5.716723  | -1.168014 | H                                                         | -5.415410 | 8.698393  | 7.958218  |
| C                                                         | 1.483427  | 5.337267  | 3.403791  | C                                                         | -1.738514 | 7.452752  | 8.795745  |
| H                                                         | 2.476892  | 5.143511  | 2.997533  | H                                                         | -2.294998 | 8.368246  | 8.579582  |
| H                                                         | 1.124458  | 6.298731  | 3.027894  | H                                                         | -1.732213 | 7.293065  | 9.875506  |
| H                                                         | 1.584263  | 5.435620  | 4.490385  | H                                                         | -0.703889 | 7.629422  | 8.482848  |
| C                                                         | -0.657058 | 6.406727  | 6.692839  | C                                                         | -0.321177 | 1.526087  | -0.687238 |
| H                                                         | 0.402336  | 6.165686  | 6.832494  | H                                                         | -0.232205 | 0.461179  | -0.927936 |
| H                                                         | -0.951568 | 6.059252  | 5.699964  | H                                                         | -1.378972 | 1.730162  | -0.508874 |
| H                                                         | -0.753398 | 7.495671  | 6.721091  | H                                                         | 0.016168  | 2.089698  | -1.562937 |
| C                                                         | -2.893635 | 8.198324  | 8.748532  | C                                                         | 1.847191  | 4.295974  | -0.627480 |
| H                                                         | -3.263862 | 7.897583  | 9.733164  | H                                                         | 2.696691  | 4.526956  | 0.021404  |
| H                                                         | -1.803645 | 8.271908  | 8.788097  | H                                                         | 2.052675  | 3.361930  | -1.157350 |
| H                                                         | -3.280785 | 9.202433  | 8.548357  | H                                                         | 1.781126  | 5.091862  | -1.376233 |
| C                                                         | -5.031873 | 5.074152  | 9.058249  | C                                                         | 1.536795  | 4.634165  | 2.971654  |
| H                                                         | -5.467659 | 4.493265  | 8.241407  | H                                                         | 0.591017  | 4.872552  | 3.466322  |
| H                                                         | -5.285516 | 4.567650  | 9.995014  | H                                                         | 2.306058  | 4.562475  | 3.747872  |
| H                                                         | -5.505272 | 6.059806  | 9.083082  | H                                                         | 1.805496  | 5.472034  | 2.320915  |
| Zero-point correction= 0.998579 (Hartree/Particle)        |           |           |           | Zero-point correction= 0.999380 (Hartree/Particle)        |           |           |           |
| Thermal correction to Energy= 1.061218                    |           |           |           | Thermal correction to Energy= 1.063164                    |           |           |           |
| Thermal correction to Enthalpy= 1.062162                  |           |           |           | Thermal correction to Enthalpy= 1.064108                  |           |           |           |
| Thermal correction to Gibbs Free Energy= 0.896198         |           |           |           | Thermal correction to Gibbs Free Energy= 0.894151         |           |           |           |
| Sum of electronic and zero-point Energies= -2743.175801   |           |           |           | Sum of electronic and zero-point Energies= -2743.173986   |           |           |           |
| Sum of electronic and thermal Energies= -2743.113162      |           |           |           | Sum of electronic and thermal Energies= -2743.110202      |           |           |           |
| Sum of electronic and thermal Enthalpies= -2743.112218    |           |           |           | Sum of electronic and thermal Enthalpies= -2743.109258    |           |           |           |
| Sum of electronic and thermal Free Energies= -2743.278182 |           |           |           | Sum of electronic and thermal Free Energies= -2743.279215 |           |           |           |

|                                              |                                               |
|----------------------------------------------|-----------------------------------------------|
| <b>TS3</b>                                   | <b>I4</b>                                     |
| 117                                          | 117                                           |
| INT0dREALetTS3 SCF Done: -2744.12783185 A.U. | INT0dREALetINT4 SCF Done: -2744.21786791 A.U. |
| O -3.003588 1.332642 0.225353                | O -2.479384 0.416195 0.608759                 |
| O -4.680831 -0.489223 2.077597               | O -4.073153 -2.071816 1.407646                |



|   |           |           |           |   |           |           |           |
|---|-----------|-----------|-----------|---|-----------|-----------|-----------|
| H | -3.887409 | -0.028950 | 2.463613  | H | -3.139256 | -2.053513 | 1.717418  |
| C | -3.999721 | 0.454729  | -0.086939 | C | -3.496744 | -0.185808 | -0.052118 |
| O | -6.279473 | -2.119382 | 0.282247  | O | -6.158414 | -2.305774 | -0.653709 |
| C | -4.675994 | -0.352806 | 0.751940  | C | -4.186574 | -1.278069 | 0.322318  |
| O | -5.350101 | -0.912708 | -1.393225 | O | -5.091861 | -0.593385 | -1.683891 |
| C | -5.535484 | -1.236078 | -0.071018 | C | -5.245605 | -1.503324 | -0.675118 |
| O | -3.906938 | 2.224942  | -2.553804 | O | -3.786072 | 2.658206  | -0.578614 |
| H | -4.175559 | 2.686042  | -3.372226 | H | -2.980983 | 2.761523  | -1.132521 |
| O | -5.662346 | 1.888376  | -4.571550 | O | -5.925994 | 3.481031  | -2.381760 |
| H | -6.538155 | 2.237281  | -4.341082 | H | -6.868469 | 3.230045  | -2.287206 |
| C | -4.348369 | 0.115447  | -1.511330 | C | -4.027303 | 0.335060  | -1.356567 |
| H | -3.480134 | -0.304919 | -2.037400 | H | -3.278892 | 0.314506  | -2.156232 |
| C | -4.927632 | 1.248608  | -2.361353 | C | -4.651442 | 1.745212  | -1.228570 |
| H | -5.784293 | 1.684255  | -1.818245 | H | -5.508053 | 1.629353  | -0.561131 |
| C | -5.398114 | 0.756369  | -3.735381 | C | -5.145332 | 2.294326  | -2.570233 |
| H | -4.586743 | 0.208688  | -4.225226 | H | -4.281374 | 2.566146  | -3.185950 |
| H | -6.263331 | 0.091618  | -3.641932 | H | -5.725222 | 1.527315  | -3.097392 |
| O | -2.388247 | 0.621058  | 2.991626  | O | -1.263874 | -1.767426 | 1.977283  |
| C | -1.518401 | -0.077039 | 2.416242  | C | -0.723811 | -1.681792 | 0.884035  |
| O | -0.219517 | 0.148443  | 2.792119  | O | 0.397575  | -0.994893 | 0.665391  |
| O | -1.680846 | -0.926120 | 1.495672  | O | -1.192493 | -2.262318 | -0.220351 |
| C | 0.155971  | -0.958245 | 0.717729  | C | -0.452740 | -1.766871 | -1.366232 |
| H | -0.160625 | -0.112676 | 0.134823  | H | -1.070453 | -1.032627 | -1.889217 |
| H | 0.042961  | -1.935554 | 0.273311  | H | -0.226536 | -2.616641 | -2.012179 |
| C | 0.674451  | -0.795676 | 2.135143  | C | 0.792747  | -1.114790 | -0.739131 |
| H | 1.641671  | -0.297404 | 2.147699  | H | 0.917383  | -0.096831 | -1.114879 |
| I | 2.488324  | -0.537053 | -0.696571 | I | -0.715007 | 2.027216  | -2.510057 |
| C | 0.726130  | -2.108336 | 2.908079  | C | 2.068534  | -1.930017 | -0.830361 |
| H | 1.405556  | -2.805122 | 2.406732  | H | 2.393929  | -1.983779 | -1.874988 |
| H | 1.104030  | -1.927094 | 3.919089  | H | 2.865453  | -1.462723 | -0.244113 |
| H | -0.270163 | -2.555381 | 2.982040  | H | 1.910527  | -2.948925 | -0.458878 |
| C | -3.364828 | 2.704769  | 0.436541  | C | -2.866613 | 0.979894  | 1.883200  |
| C | -2.087012 | 3.428814  | 0.876771  | C | -1.671863 | 1.744409  | 2.441692  |
| C | -0.984835 | 3.055882  | -0.135448 | C | -1.221380 | 2.753444  | 1.365180  |
| N | 0.420821  | 3.613866  | 0.070113  | N | 0.138269  | 3.417408  | 1.550191  |
| O | -1.749411 | 3.171231  | 2.223450  | O | -0.627172 | 0.897677  | 2.893939  |
| H | -2.040498 | 2.262126  | 2.480626  | H | -0.832285 | -0.036755 | 2.692933  |
| C | 0.407644  | 5.129916  | 0.268314  | C | 0.367824  | 3.838290  | 2.990635  |
| H | -0.358417 | 5.509565  | -0.411107 | H | 0.373690  | 2.913741  | 3.570251  |
| H | 1.372811  | 5.490236  | -0.094222 | H | 1.369491  | 4.265306  | 3.032148  |
| C | 1.237550  | 3.283095  | -1.192160 | C | 0.111842  | 4.620276  | 0.594345  |
| H | 2.244784  | 3.647314  | -0.989148 | H | -0.154774 | 4.202538  | -0.380297 |
| H | 1.290311  | 2.191662  | -1.242599 | H | -0.711651 | 5.257774  | 0.917016  |
| C | 1.072996  | 2.874639  | 1.247954  | C | 1.199751  | 2.394792  | 1.087055  |
| H | 0.446262  | 3.086812  | 2.109113  | H | 0.812264  | 1.422930  | 1.380697  |
| H | 0.965238  | 1.815563  | 1.014098  | H | 1.187471  | 2.457959  | -0.003439 |
| H | -4.111059 | 2.787518  | 1.236245  | H | -3.172484 | 0.189319  | 2.575384  |
| H | -3.758735 | 3.131405  | -0.491096 | H | -3.714110 | 1.645656  | 1.719576  |
| H | -1.320707 | 3.387434  | -1.118076 | H | -1.967140 | 3.548098  | 1.303837  |
| H | -0.873278 | 1.974205  | -0.173498 | H | -1.172072 | 2.274352  | 0.387975  |
| H | -2.292959 | 4.504025  | 0.802522  | H | -2.040571 | 2.295307  | 3.318307  |
| O | -2.792565 | -1.904362 | 6.408354  | O | -6.004535 | 2.976248  | 2.928999  |
| O | -4.342111 | -3.270080 | 8.636862  | O | -6.240652 | 4.399646  | 0.138055  |
| H | -3.658919 | -2.608069 | 8.893258  | H | -5.915111 | 4.188150  | -0.783581 |
| C | -3.467508 | -3.084643 | 6.356640  | C | -6.754285 | 2.723439  | 1.848616  |
| O | -5.468024 | -5.703144 | 7.417439  | O | -8.375738 | 2.801287  | -1.210750 |
| C | -4.141831 | -3.655899 | 7.370570  | C | -6.885908 | 3.318111  | 0.638363  |
| O | -4.358663 | -5.067330 | 5.544837  | O | -8.495485 | 1.652437  | 0.732998  |
| C | -4.747515 | -4.913961 | 6.865781  | C | -7.967810 | 2.618042  | -0.078945 |
| O | -2.809999 | -2.586008 | 3.396906  | O | -5.983889 | 0.072595  | 2.825124  |
| H | -2.953854 | -2.449429 | 2.440710  | H | -5.809045 | -0.890605 | 2.868103  |
| O | -4.248118 | -3.818498 | 1.474397  | O | -7.163583 | -2.206569 | 2.016654  |
| H | -5.103805 | -3.360230 | 1.386903  | H | -6.788185 | -2.462992 | 1.148729  |
| C | -3.464648 | -4.007209 | 5.164277  | C | -7.680073 | 1.536338  | 1.917422  |
| H | -2.465360 | -4.439411 | 5.007491  | H | -8.325690 | 1.553600  | 2.802166  |
| C | -3.897013 | -3.399393 | 3.828459  | C | -6.944672 | 0.188070  | 1.798062  |
| H | -4.800693 | -2.785298 | 3.972217  | H | -6.455462 | 0.207359  | 0.812578  |

|                                                           |           |           |           |                                                           |           |           |           |
|-----------------------------------------------------------|-----------|-----------|-----------|-----------------------------------------------------------|-----------|-----------|-----------|
| C                                                         | -4.180582 | -4.451531 | 2.749583  | C                                                         | -7.908365 | -1.013033 | 1.844147  |
| H                                                         | -3.341913 | -5.154442 | 2.697102  | H                                                         | -8.556154 | -0.921025 | 2.724650  |
| H                                                         | -5.089654 | -5.015609 | 2.989165  | H                                                         | -8.535932 | -1.029389 | 0.944957  |
| I                                                         | -1.499476 | -1.156052 | 9.847817  | I                                                         | -2.717933 | 7.318413  | 1.039939  |
| C                                                         | -3.473248 | -0.776074 | 5.823415  | C                                                         | -4.851282 | 3.840979  | 2.841975  |
| C                                                         | -2.750715 | 0.500553  | 6.271061  | C                                                         | -5.150101 | 5.177649  | 3.545657  |
| C                                                         | -1.247051 | 0.211061  | 6.182111  | C                                                         | -6.043363 | 6.003499  | 2.614255  |
| N                                                         | -0.261488 | 1.379594  | 6.316856  | N                                                         | -6.670006 | 7.272849  | 3.175720  |
| O                                                         | -3.165750 | 0.952842  | 7.539119  | O                                                         | -3.955903 | 5.820151  | 3.931209  |
| H                                                         | -2.868842 | 0.307688  | 8.226179  | H                                                         | -3.512806 | 6.194790  | 3.125218  |
| C                                                         | -0.637249 | 2.457022  | 5.315925  | C                                                         | -7.423773 | 6.988630  | 4.469449  |
| H                                                         | -0.850543 | 1.936783  | 4.384115  | H                                                         | -6.658714 | 6.800790  | 5.225398  |
| H                                                         | -1.568630 | 2.893386  | 5.671535  | H                                                         | -7.931871 | 7.917536  | 4.735404  |
| C                                                         | 1.107799  | 0.812058  | 5.934617  | C                                                         | -7.650709 | 7.798789  | 2.125925  |
| H                                                         | 1.824303  | 1.620215  | 6.090992  | H                                                         | -8.090022 | 8.703219  | 2.550812  |
| H                                                         | 1.051017  | 0.601677  | 4.863856  | H                                                         | -8.440610 | 7.050289  | 2.046974  |
| C                                                         | -0.168856 | 1.916890  | 7.764371  | C                                                         | -5.564940 | 8.304111  | 3.459477  |
| H                                                         | -0.357908 | 1.057560  | 8.413269  | H                                                         | -4.973330 | 7.873302  | 4.266353  |
| H                                                         | 0.871578  | 2.224688  | 7.893989  | H                                                         | -4.918841 | 8.312335  | 2.579388  |
| H                                                         | -4.508329 | -0.729038 | 6.180310  | H                                                         | -4.531662 | 3.976086  | 1.805191  |
| H                                                         | -3.448696 | -0.866418 | 4.736131  | H                                                         | -4.067179 | 3.342698  | 3.414939  |
| H                                                         | -1.029945 | -0.240008 | 5.213515  | H                                                         | -6.873397 | 5.394416  | 2.262791  |
| H                                                         | -0.997048 | -0.493775 | 6.972891  | H                                                         | -5.455164 | 6.297220  | 1.745757  |
| H                                                         | -3.046061 | 1.276856  | 5.557984  | H                                                         | -5.669151 | 4.922601  | 4.475974  |
| C                                                         | 0.731522  | 3.873464  | -2.503159 | C                                                         | -7.046218 | 8.058868  | 0.749301  |
| H                                                         | 1.471580  | 3.619733  | -3.269019 | H                                                         | -6.166817 | 8.706867  | 0.782976  |
| H                                                         | -0.220821 | 3.448354  | -2.829445 | H                                                         | -6.771299 | 7.130845  | 0.242370  |
| H                                                         | 0.647672  | 4.964107  | -2.479000 | H                                                         | -7.811075 | 8.556704  | 0.144052  |
| C                                                         | 2.545443  | 3.187110  | 1.486311  | C                                                         | -0.637040 | 4.845374  | 3.539928  |
| H                                                         | 2.810742  | 2.769744  | 2.463507  | H                                                         | -0.602449 | 5.805810  | 3.020286  |
| H                                                         | 3.193160  | 2.705623  | 0.749764  | H                                                         | -1.671061 | 4.495760  | 3.511693  |
| H                                                         | 2.765359  | 4.258390  | 1.519658  | H                                                         | -0.385289 | 5.022817  | 4.591108  |
| C                                                         | 0.172567  | 5.640725  | 1.688737  | C                                                         | 1.392679  | 5.431345  | 0.491669  |
| H                                                         | -0.728412 | 5.240084  | 2.151834  | H                                                         | 1.743722  | 5.805292  | 1.458869  |
| H                                                         | 1.016550  | 5.420396  | 2.346378  | H                                                         | 2.200943  | 4.885499  | -0.001470 |
| H                                                         | 0.078063  | 6.730127  | 1.629410  | H                                                         | 1.157474  | 6.304451  | -0.125343 |
| C                                                         | 1.537607  | -0.428756 | 6.713678  | C                                                         | 2.606919  | 2.555106  | 1.651688  |
| H                                                         | 0.970675  | -1.317391 | 6.429037  | H                                                         | 2.649611  | 2.328905  | 2.720796  |
| H                                                         | 2.592486  | -0.615082 | 6.485077  | H                                                         | 3.236752  | 1.818342  | 1.140403  |
| H                                                         | 1.441165  | -0.306327 | 7.795620  | H                                                         | 3.048610  | 3.538400  | 1.479425  |
| C                                                         | -1.102731 | 3.059081  | 8.140267  | C                                                         | -8.422045 | 5.833468  | 4.426739  |
| H                                                         | -0.874611 | 3.995762  | 7.621730  | H                                                         | -9.224308 | 5.990093  | 3.700913  |
| H                                                         | -2.145343 | 2.777921  | 7.990269  | H                                                         | -7.946656 | 4.871297  | 4.221278  |
| H                                                         | -0.960221 | 3.230559  | 9.212785  | H                                                         | -8.887931 | 5.766417  | 5.415318  |
| C                                                         | 0.408325  | 3.545580  | 5.096687  | C                                                         | -6.043669 | 9.709859  | 3.794174  |
| H                                                         | 0.746360  | 4.004612  | 6.029978  | H                                                         | -6.526090 | 10.205615 | 2.947085  |
| H                                                         | 1.284755  | 3.178654  | 4.553973  | H                                                         | -6.711603 | 9.753581  | 4.660427  |
| H                                                         | -0.056106 | 4.325326  | 4.485486  | H                                                         | -5.152171 | 10.295328 | 4.041108  |
| Zero-point correction= 0.998967 (Hartree/Particle)        |           |           |           | Zero-point correction= 1.003542 (Hartree/Particle)        |           |           |           |
| Thermal correction to Energy= 1.061748                    |           |           |           | Thermal correction to Energy= 1.065868                    |           |           |           |
| Thermal correction to Enthalpy= 1.062692                  |           |           |           | Thermal correction to Enthalpy= 1.066813                  |           |           |           |
| Thermal correction to Gibbs Free Energy= 0.895725         |           |           |           | Thermal correction to Gibbs Free Energy= 0.902150         |           |           |           |
| Sum of electronic and zero-point Energies= -2743.128864   |           |           |           | Sum of electronic and zero-point Energies= -2743.214326   |           |           |           |
| Sum of electronic and thermal Energies= -2743.066084      |           |           |           | Sum of electronic and thermal Energies= -2743.151999      |           |           |           |
| Sum of electronic and thermal Enthalpies= -2743.065139    |           |           |           | Sum of electronic and thermal Enthalpies= -2743.151055    |           |           |           |
| Sum of electronic and thermal Free Energies= -2743.232107 |           |           |           | Sum of electronic and thermal Free Energies= -2743.315718 |           |           |           |

## I0 (isomer plane)

104

INT0det SCF Done: -2362.43479391 A.U.

|   |           |           |           |
|---|-----------|-----------|-----------|
| O | -3.823625 | 1.629528  | 0.986012  |
| O | -3.665590 | -1.228977 | 1.931523  |
| H | -3.283197 | -0.521836 | 2.512106  |
| C | -4.368737 | 0.549654  | 0.384653  |
| O | -5.113219 | -2.804100 | -0.047625 |
| C | -4.319187 | -0.702856 | 0.873395  |
| O | -5.566592 | -0.831651 | -1.054413 |

|   |           |           |           |
|---|-----------|-----------|-----------|
| C | -5.018724 | -1.596202 | -0.055344 |
| O | -6.024755 | 2.762283  | -0.827486 |
| H | -6.788736 | 3.271618  | -1.156834 |
| O | -8.355734 | 2.196478  | -2.107144 |
| H | -9.034100 | 1.976305  | -1.448665 |
| C | -5.191083 | 0.544280  | -0.885050 |
| H | -4.601399 | 0.826825  | -1.766886 |
| C | -6.451865 | 1.410925  | -0.845938 |
| H | -7.014084 | 1.161295  | 0.070894  |
| C | -7.350623 | 1.179632  | -2.066943 |
| H | -6.764661 | 1.306328  | -2.983002 |
| H | -7.774942 | 0.169415  | -2.060487 |
| I | -1.701558 | 0.564216  | 4.151088  |
| C | -3.203026 | 2.649442  | 0.186500  |
| C | -1.674048 | 2.599247  | 0.336496  |
| C | -1.157094 | 1.216603  | -0.095039 |
| N | 0.363318  | 0.983585  | -0.169156 |
| O | -1.256306 | 3.001011  | 1.619233  |
| H | -1.615608 | 2.389771  | 2.303731  |
| C | 1.082000  | 2.159895  | -0.823433 |
| H | 0.427681  | 2.471478  | -1.642856 |
| H | 1.984313  | 1.747668  | -1.276300 |
| C | 0.503087  | -0.240973 | -1.094135 |
| H | -0.284523 | -0.928029 | -0.778097 |
| H | 0.238968  | 0.132863  | -2.088976 |
| C | 0.861291  | 0.673304  | 1.251189  |
| H | 0.416479  | 1.447862  | 1.869497  |
| H | 0.378742  | -0.271736 | 1.512254  |
| H | -3.552003 | 3.606137  | 0.578436  |
| H | -3.510482 | 2.576392  | -0.859243 |
| H | -1.540650 | 0.997201  | -1.094605 |
| H | -1.538703 | 0.451124  | 0.580646  |
| H | -1.293514 | 3.363951  | -0.352238 |
| O | -0.553221 | -3.045230 | 1.949998  |
| O | 1.006122  | -5.691515 | 2.352942  |
| H | 1.888788  | -5.224473 | 2.367438  |
| C | -0.260269 | -4.038200 | 1.073537  |
| O | 0.727360  | -7.065270 | -0.292265 |
| C | 0.363122  | -5.213871 | 1.246398  |
| O | -0.318997 | -5.162982 | -0.961907 |
| C | 0.322231  | -5.965062 | -0.030315 |
| O | -2.051380 | -1.999127 | -0.289097 |
| H | -2.208107 | -1.972921 | 0.671232  |
| O | -3.544124 | -2.803892 | -2.531150 |
| H | -4.239920 | -3.115538 | -1.925665 |
| C | -0.594580 | -3.877391 | -0.387662 |
| H | 0.105059  | -3.161538 | -0.839940 |
| C | -2.010223 | -3.368154 | -0.693149 |
| H | -2.761215 | -3.944469 | -0.136221 |
| C | -2.328594 | -3.436462 | -2.188714 |
| H | -1.542172 | -2.908798 | -2.744132 |
| H | -2.296933 | -4.491988 | -2.497116 |
| I | 3.519077  | -3.301465 | 2.010111  |
| C | -1.402722 | -3.372846 | 3.088942  |
| C | -0.658430 | -3.646042 | 4.407781  |
| C | 0.559646  | -2.716844 | 4.468084  |
| N | 1.224252  | -2.528699 | 5.833146  |
| O | -0.363361 | -5.007635 | 4.634678  |
| H | 0.140840  | -5.354089 | 3.864488  |
| C | 0.234409  | -1.828786 | 6.764314  |
| H | -0.188149 | -0.996385 | 6.198192  |
| H | -0.568802 | -2.546896 | 6.937363  |
| C | 2.480439  | -1.681914 | 5.611665  |
| H | 3.039383  | -1.720297 | 6.550002  |
| H | 3.056541  | -2.199267 | 4.841386  |
| C | 1.633988  | -3.860267 | 6.469180  |
| H | 0.713802  | -4.431521 | 6.581774  |

|                                              |           |           |                             |
|----------------------------------------------|-----------|-----------|-----------------------------|
| H                                            | 2.024007  | -3.604620 | 7.456240                    |
| H                                            | -2.023866 | -4.240309 | 2.846232                    |
| H                                            | -2.032175 | -2.492130 | 3.209772                    |
| H                                            | 0.251506  | -1.720679 | 4.150673                    |
| H                                            | 1.332467  | -3.064991 | 3.781461                    |
| H                                            | -1.382618 | -3.376134 | 5.185338                    |
| C                                            | 2.235306  | -0.241900 | 5.177410                    |
| H                                            | 3.217509  | 0.215167  | 5.017540                    |
| H                                            | 1.686981  | -0.179626 | 4.236374                    |
| H                                            | 1.698514  | 0.355033  | 5.918394                    |
| C                                            | 0.792787  | -1.346334 | 8.099166                    |
| H                                            | -0.029061 | -0.857393 | 8.632357                    |
| H                                            | 1.156853  | -2.158471 | 8.734467                    |
| H                                            | 1.589125  | -0.606942 | 7.983546                    |
| C                                            | 2.656667  | -4.680183 | 5.696182                    |
| H                                            | 2.793552  | -5.620358 | 6.241061                    |
| H                                            | 2.314471  | -4.927593 | 4.693021                    |
| H                                            | 3.630608  | -4.193780 | 5.613484                    |
| C                                            | 1.848111  | -0.952916 | -1.127719                   |
| H                                            | 2.085890  | -1.475049 | -0.197837                   |
| H                                            | 1.777732  | -1.714933 | -1.912205                   |
| H                                            | 2.686920  | -0.302413 | -1.391740                   |
| C                                            | 2.382788  | 0.595893  | 1.462870                    |
| H                                            | 2.656607  | 1.225107  | 2.314656                    |
| H                                            | 2.704548  | -0.426158 | 1.677167                    |
| H                                            | 2.967603  | 0.940529  | 0.608747                    |
| C                                            | 1.448630  | 3.343056  | 0.072553                    |
| H                                            | 0.628135  | 3.681427  | 0.703978                    |
| H                                            | 2.293130  | 3.108352  | 0.722561                    |
| H                                            | 1.754595  | 4.166591  | -0.581726                   |
| Zero-point correction=                       |           |           | 0.894898 (Hartree/Particle) |
| Thermal correction to Energy=                |           |           | 0.950630                    |
| Thermal correction to Enthalpy=              |           |           | 0.951574                    |
| Thermal correction to Gibbs Free Energy=     |           |           | 0.801640                    |
| Sum of electronic and zero-point Energies=   |           |           | -2361.539896                |
| Sum of electronic and thermal Energies=      |           |           | -2361.484164                |
| Sum of electronic and thermal Enthalpies=    |           |           | -2361.483220                |
| Sum of electronic and thermal Free Energies= |           |           | -2361.633154                |

### 7-Me-I tetramer

|                                     |           |           |           |
|-------------------------------------|-----------|-----------|-----------|
| <b>II</b>                           |           |           |           |
| 172                                 |           |           |           |
| INT1q SCF Done: -4253.14559194 A.U. |           |           |           |
| O                                   | -3.543811 | -0.226755 | 2.811847  |
| O                                   | -2.749782 | -2.990270 | 1.838715  |
| H                                   | -2.457175 | -2.736483 | 2.754666  |
| C                                   | -3.966953 | -0.849487 | 1.690493  |
| O                                   | -4.142175 | -3.360704 | -0.686738 |
| C                                   | -3.632425 | -2.103259 | 1.327649  |
| O                                   | -5.078837 | -1.341821 | -0.294658 |
| C                                   | -4.275797 | -2.401700 | 0.041481  |
| O                                   | -6.147499 | 1.208016  | 2.057004  |
| H                                   | -7.029974 | 1.621057  | 2.105394  |
| O                                   | -8.495308 | 0.977856  | 0.709087  |
| H                                   | -9.024594 | 0.268435  | 1.107685  |
| C                                   | -4.943242 | -0.293354 | 0.677447  |
| H                                   | -4.543875 | 0.583282  | 0.150957  |
| C                                   | -6.322428 | 0.066595  | 1.235489  |
| H                                   | -6.692814 | -0.791103 | 1.823551  |
| C                                   | -7.329970 | 0.390103  | 0.125043  |
| H                                   | -6.912733 | 1.155319  | -0.537532 |
| H                                   | -7.561650 | -0.499633 | -0.471073 |
| I                                   | -1.228267 | -2.552519 | 4.935514  |
| C                                   | -3.211690 | 1.172497  | 2.772675  |
| C                                   | -1.687601 | 1.343261  | 2.714423  |
| C                                   | -1.147447 | 0.782477  | 1.377872  |

|   |           |           |           |
|---|-----------|-----------|-----------|
| N | 0.361613  | 0.579131  | 1.294832  |
| O | -1.055702 | 0.828881  | 3.861849  |
| H | -1.397763 | -0.067891 | 4.086199  |
| C | 1.123261  | 1.714744  | 1.917247  |
| H | 0.799808  | 2.650660  | 1.456220  |
| H | 0.922538  | 1.722042  | 2.987446  |
| H | 2.185181  | 1.551899  | 1.723962  |
| C | 0.735791  | 0.473171  | -0.165687 |
| H | 1.775867  | 0.142940  | -0.236268 |
| H | 0.073078  | -0.262747 | -0.618596 |
| H | 0.603372  | 1.451784  | -0.631992 |
| C | 0.754468  | -0.715380 | 1.972860  |
| H | 0.460217  | -0.663511 | 3.016720  |
| H | 0.242242  | -1.531008 | 1.466647  |
| H | 1.830943  | -0.847565 | 1.849966  |
| H | -3.571896 | 1.590863  | 3.713890  |
| H | -3.722021 | 1.683832  | 1.953266  |
| H | -1.411336 | 1.478875  | 0.575631  |
| H | -1.576187 | -0.186731 | 1.126176  |
| H | -1.491386 | 2.423637  | 2.734926  |
| O | 0.332825  | -3.956472 | 0.800269  |
| O | 2.456199  | -5.986849 | -0.351474 |
| H | 3.396141  | -5.768764 | -0.619587 |
| C | 0.824020  | -4.152240 | -0.432468 |
| O | 2.281728  | -5.497905 | -3.260203 |
| C | 1.678721  | -5.048662 | -0.959849 |
| O | 0.891806  | -3.791032 | -2.731756 |
| C | 1.690242  | -4.851754 | -2.415599 |
| O | -1.342873 | -2.048181 | -0.402653 |
| H | -1.477291 | -2.631102 | 0.368289  |
| O | -2.853613 | -1.641722 | -2.727729 |
| H | -3.422632 | -2.359509 | -2.396864 |
| C | 0.400992  | -3.194312 | -1.514228 |
| H | 0.948873  | -2.253151 | -1.380664 |
| C | -1.099239 | -2.873895 | -1.541126 |
| H | -1.693844 | -3.793624 | -1.463603 |
| C | -1.523026 | -2.109664 | -2.796055 |
| H | -0.887995 | -1.221640 | -2.912317 |
| H | -1.343756 | -2.756018 | -3.668832 |
| I | 4.039842  | -2.033845 | 0.330256  |
| C | 0.127851  | -5.074803 | 1.707055  |
| C | 1.257251  | -5.273632 | 2.733655  |
| C | 1.838198  | -3.896267 | 3.059898  |
| N | 2.859395  | -3.864276 | 4.190661  |
| O | 2.225712  | -6.229306 | 2.370590  |
| H | 2.445379  | -6.118628 | 1.420856  |
| C | 2.408319  | -4.684970 | 5.369347  |
| H | 1.389447  | -4.388277 | 5.629587  |
| H | 2.471237  | -5.741624 | 5.108293  |
| H | 3.088277  | -4.484884 | 6.199338  |
| C | 2.997989  | -2.425564 | 4.609226  |
| H | 3.777770  | -2.359158 | 5.370727  |
| H | 3.285374  | -1.844109 | 3.730058  |
| H | 2.040164  | -2.084077 | 5.009001  |
| C | 4.199473  | -4.360165 | 3.705714  |
| H | 4.059467  | -5.365008 | 3.316535  |
| H | 4.542488  | -3.683032 | 2.921869  |
| H | 4.894630  | -4.366955 | 4.544771  |
| H | -0.017741 | -5.994636 | 1.132980  |
| H | -0.796285 | -4.808019 | 2.223575  |
| H | 1.021173  | -3.244819 | 3.375406  |
| H | 2.340453  | -3.465604 | 2.190700  |
| H | 0.759600  | -5.678648 | 3.621281  |
| O | 5.510456  | -6.658314 | 1.102591  |
| O | 5.303359  | -9.606592 | 1.748373  |
| H | 5.054935  | -8.967195 | 2.457776  |
| C | 5.636971  | -7.692386 | 0.234474  |

|   |           |            |           |
|---|-----------|------------|-----------|
| O | 5.798957  | -11.006762 | -0.757923 |
| C | 5.481007  | -8.989010  | 0.557735  |
| O | 5.970672  | -8.957183  | -1.692614 |
| C | 5.735609  | -9.802791  | -0.641401 |
| O | 4.838274  | -5.520651  | -1.438702 |
| H | 4.757926  | -4.858970  | -2.161939 |
| O | 4.908880  | -5.360844  | -4.051614 |
| H | 3.936770  | -5.457778  | -4.111119 |
| C | 5.963041  | -7.595708  | -1.241923 |
| H | 6.976515  | -7.201913  | -1.398079 |
| C | 4.973271  | -6.789443  | -2.085544 |
| H | 4.003263  | -7.301946  | -2.083257 |
| C | 5.454360  | -6.564641  | -3.535922 |
| H | 6.541474  | -6.428922  | -3.553416 |
| H | 5.209738  | -7.441724  | -4.147894 |
| I | 4.789461  | -8.053604  | 4.940003  |
| C | 6.402839  | -5.526788  | 1.001475  |
| C | 7.469901  | -5.620343  | 2.097930  |
| C | 8.413558  | -6.806171  | 1.803346  |
| N | 9.358138  | -7.221435  | 2.928502  |
| O | 6.904643  | -5.643312  | 3.391982  |
| H | 6.221796  | -6.347420  | 3.460303  |
| C | 9.965084  | -6.034793  | 3.620622  |
| H | 10.448874 | -5.399769  | 2.875322  |
| H | 9.173808  | -5.491141  | 4.134729  |
| H | 10.704435 | -6.402298  | 4.334559  |
| C | 10.455278 | -8.061012  | 2.316688  |
| H | 11.030470 | -8.526207  | 3.121438  |
| H | 9.975702  | -8.822481  | 1.702487  |
| H | 11.091036 | -7.417733  | 1.704854  |
| C | 8.635639  | -8.076896  | 3.946390  |
| H | 7.840829  | -7.491051  | 4.397276  |
| H | 8.230137  | -8.946934  | 3.433751  |
| H | 9.362871  | -8.415301  | 4.687658  |
| H | 5.790445  | -4.635138  | 1.147102  |
| H | 6.846359  | -5.455076  | 0.007205  |
| H | 9.046746  | -6.541356  | 0.950956  |
| H | 7.869856  | -7.713058  | 1.538603  |
| H | 8.048776  | -4.689766  | 2.053638  |
| O | 7.787340  | -11.301407 | 3.508622  |
| O | 9.288176  | -13.615693 | 4.971888  |
| H | 9.912694  | -13.070182 | 5.511137  |
| C | 8.810045  | -12.093974 | 3.115118  |
| O | 11.086893 | -14.681882 | 2.822109  |
| C | 9.416574  | -13.141893 | 3.691537  |
| O | 10.335018 | -12.932644 | 1.577528  |
| C | 10.380011 | -13.716026 | 2.721910  |
| O | 8.116818  | -10.058480 | 1.017815  |
| H | 7.374033  | -10.194717 | 1.632191  |
| O | 8.606080  | -10.646830 | -1.683509 |
| H | 7.717025  | -11.043922 | -1.686389 |
| C | 9.522510  | -11.776918 | 1.826788  |
| H | 10.207915 | -10.938769 | 2.011965  |
| C | 8.616222  | -11.355758 | 0.665373  |
| H | 7.775312  | -12.051021 | 0.545087  |
| C | 9.371212  | -11.242856 | -0.658319 |
| H | 10.251519 | -10.601951 | -0.518017 |
| H | 9.737302  | -12.246034 | -0.925843 |
| I | 11.057376 | -10.533385 | 5.875961  |
| C | 6.561788  | -11.907987 | 4.005934  |
| C | 6.450934  | -11.960931 | 5.541764  |
| C | 7.221351  | -10.764554 | 6.099547  |
| N | 7.114071  | -10.535960 | 7.604423  |
| O | 6.812524  | -13.201928 | 6.113017  |
| H | 7.692937  | -13.460604 | 5.758482  |
| C | 5.685610  | -10.599076 | 8.067346  |
| H | 5.085577  | -9.934458  | 7.441014  |

|   |          |            |          |
|---|----------|------------|----------|
| H | 5.335468 | -11.628032 | 7.986742 |
| H | 5.648467 | -10.277560 | 9.110161 |
| C | 7.661743 | -9.154898  | 7.867853 |
| H | 7.659225 | -8.979507  | 8.945784 |
| H | 8.683231 | -9.118309  | 7.480516 |
| H | 7.022659 | -8.429398  | 7.358990 |
| C | 7.947219 | -11.542191 | 8.361772 |
| H | 7.575936 | -12.535649 | 8.118566 |
| H | 8.985951 | -11.432109 | 8.040908 |
| H | 7.852161 | -11.329398 | 9.428913 |
| H | 6.460908 | -12.919029 | 3.599796 |
| H | 5.777717 | -11.266887 | 3.599373 |
| H | 6.833272 | -9.856895  | 5.634210 |
| H | 8.289164 | -10.847474 | 5.889788 |
| H | 5.382072 | -11.844346 | 5.751656 |

## S15. Supporting References

1. J. D. McClure, *The Journal of Organic Chemistry*, 1970, **35**, 2059-2061.
2. M. Yoshioka, N. Taira, M. Wakita, *Cationic ascorbic acid derivative and cosmetic incorporating the compound*, JP2016121099A, 2016.
3. S. Arayachukiat, C. Kongtes, A. Barthel, S. V. C. Vummaleti, A. Poater, S. Wannakao, L. Cavallo and V. D'Elia, *ACS Sustainable Chemistry & Engineering*, 2017, **5**, 6392-6397.
4. W. Natongchai, S. Pornpraprom and V. D' Elia, *Asian Journal of Organic Chemistry*, 2020, **9**, 801-810.
5. H. Büttner, C. Grimmer, J. Steinbauer and T. Werner, *ACS Sustainable Chemistry & Engineering*, 2016, **4**, 4805-4814.
6. W. Natongchai, S. Posada-Pérez, C. Phungpanya, J. A. Luque-Urrutia, M. Solà, V. D'Elia and A. Poater, *The Journal of Organic Chemistry*, 2022, **87**, 2873-2886.
7. F. Castro-Gómez, G. Salassa, A. W. Kleij and C. Bo, *Chemistry - A European Journal*, 2013, **19**, 6289-6298.
8. S. Kozuch and S. Shaik, *Accounts of Chemical Research*, 2011, **44**, 101-110.
9. M. J. Frisch, G. W. Trucks, H. B. Schlegel, G. E. Scuseria, M. A. Robb, J. R. Cheeseman, G. Scalmani, V. Barone, G. A. Petersson, H. Nakatsuji, X. Li, M. Caricato, A. Marenich, J. Bloino, B. G. Janesko, R. Gomperts, B. Mennucci, H. P. Hratchian, J. V. Ortiz, A. F. Izmaylov, J. L. Sonnenberg, D. Williams-Young, F. Ding, F. Lipparini, F. Egidi, J. Goings, B. Peng, A. Petrone, T. Henderson, D. Ranasinghe, V. G. Zakrzewski, J. Gao, N. Rega, G. Zheng, W. Liang, M. Hada, M. Ehara, K. Toyota, R. Fukuda, J. Hasegawa, M. Ishida, T. Nakajima, Y. Honda, O. Kitao, H. Nakai, T. Vreven, K. Throssell, J. A. Montgomery, Jr., J. E. Peralta, F. Ogliaro, M. Bearpark, J. J. Heyd, E. Brothers, K. N. Kudin, V. N. Staroverov, T. Keith, R. Kobayashi, J. Normand, K. Raghavachari, A. Rendell, J. C. Burant, S. S. Iyengar, J. Tomasi, M. Cossi, J. M. Millam, M. Klene, C. Adamo, R. Cammi, J. W. Ochterski, R. L. Martin, K. Morokuma, O. Farkas, J. B. Foresman, and D. J. Fox, "*Gaussian 09*," Revision A.1, Gaussian, Inc., Wallingford, 2009.
10. A. D. Becke, *The Journal of Chemical Physics*, 1993, **98**, 5648-5652.
11. C. Lee, W. Yang and R. G. Parr, *Physical Review B*, 1988, **37**, 785-789.
12. S. H. Vosko, L. Wilk and M. Nusair, *Canadian Journal of Physics*, 1980, **58**, 1200-1211.
13. P. J. Stephens, F. J. Devlin, C. F. Chabalowski and M. J. Frisch, *The Journal of Physical Chemistry*, 1994, **98**, 11623-11627.
14. W. J. Hehre, R. Ditchfield and J. A. Pople, *The Journal of Chemical Physics*, 1972, **56**, 2257-2261.
15. S. Grimme, J. Antony, S. Ehrlich and H. Krieg, *The Journal of Chemical Physics*, 2010, **132**, 154104.

16. S. Grimme, S. Ehrlich and L. Goerigk, *Journal of Computational Chemistry*, 2011, **32**, 1456-1465.
17. U. Häussermann, M. Dolg, H. Stoll, H. Preuss, P. Schwerdtfeger and R. M. Pitzer, *Molecular Physics*, 1993, **78**, 1211-1224.
18. W. Küchle, M. Dolg, H. Stoll and H. Preuss, *The Journal of Chemical Physics*, 1994, **100**, 7535-7542.
19. V. Barone and M. Cossi, *The Journal of Physical Chemistry A*, 1998, **102**, 1995-2001.
20. J. Tomasi and M. Persico, *Chemical Reviews*, 1994, **94**, 2027-2094.
